# Supplementary material for: Macrophage Resistance to Ionizing Radiation Exposure Is Accompanied by Decreased Cathepsin D and Increased Transferrin Receptor 1 Expression
Source: MDPI journal article supplement (doi:10.3390/cancers15010270), 2022-12-30
Supplement: s1 [file s1]

# Macrophage resistance to ionizing radiation exposure is accompanied by decreased Cathepsin D and increased Transferrin receptor 1 expression

Ana Teresa Pinto<sup>1,2,3\*</sup>, Ana Beatriz Machado<sup>1,2,4</sup>, Hugo Osório<sup>1,5,6</sup>, Marta Laranjeira Pinto<sup>1,2</sup>, Rui Vitorino<sup>3</sup>, Gonçalo Justino<sup>7</sup>, Cátia Santa<sup>8,9</sup>, Flávia Castro<sup>1,2</sup>, Tânia Cruz<sup>1,2</sup>, Carla Rodrigues<sup>10</sup>, Jorge Lima<sup>1,5</sup>, José Luís R Sousa<sup>11</sup>, Ana Patrícia Cardoso<sup>1,2</sup>, Rita Figueira<sup>12</sup>, Armanda Monteiro<sup>12</sup>, Margarida Marques<sup>12</sup>, Bruno Manadas<sup>9</sup>, Jarne Pauwels<sup>13,14</sup>, Kris Gevaert<sup>13,14</sup>, Marc Mareel<sup>15</sup>, Sónia Rocha<sup>16</sup>, Tiago Duarte<sup>1,17</sup>, Maria José Oliveira<sup>1,2,6</sup>

<sup>1</sup> i3S - Instituto de Investigação e Inovação em Saúde, Universidade do Porto, 4200-135 Porto, Portugal

<sup>2</sup> INEB - Instituto de Engenharia Biomédica, Universidade do Porto, 4200-135 Porto, Portugal

<sup>3</sup> Department of Medical Sciences, Institute of Biomedicine (iBiMED), Universidade de Aveiro, 3810-193 Aveiro, Portugal

<sup>4</sup> Champalimaud Centre for the Unknown, Fundação Champalimaud, 1400-038 Lisboa, Portugal

<sup>5</sup> IPATIMUP - Instituto de Patologia e Imunologia Molecular da Universidade do Porto, 4200-135 Porto, Portugal

<sup>6</sup> Department of Pathology, Faculdade de Medicina, Universidade do Porto, 4200-319 Porto, Portugal

<sup>7</sup> Centro de Química Estrutural – Institute of Molecular Sciences, Instituto Superior Técnico, Universidade Técnica de Lisboa, 1049-001 Lisboa, Portugal

<sup>8</sup> CNC - Center for Neuroscience and Cell Biology, Universidade de Coimbra, 3004-504 Coimbra, Portugal

<sup>9</sup> Institute for Interdisciplinary Research (III), Universidade de Coimbra, 3030-789 Coimbra, Portugal

<sup>10</sup> REQUIMTE - LAQV, Chemistry Department, NOVA School of Science and Technology, Universidade de Lisboa, 2829-516 Caparica, Portugal

<sup>11</sup> Personal Health Data Science Group, Sano-Centre for Computational Personalised Medicine, 30-054 Krakow, Poland

<sup>12</sup> Radiotherapy Service, Centro Hospitalar Universitário São João (CHUSJ), EPE, 4200-319 Porto, Portugal

<sup>13</sup> VIB-UGent Center for Medical Biotechnology, 9052 Ghent, Belgium

<sup>14</sup> Department of Biomolecular Medicine, Ghent University, 9052 Ghent, Belgium

<sup>15</sup> Department of Radiation Oncology and Experimental Cancer Research, Ghent University Hospital, 9000 Ghent, Belgium

<sup>16</sup> Institute of System, Molecular and Integrative Biology, University of Liverpool, L69 3GE Liverpool, UK

<sup>17</sup> IBMC - Instituto de Biologia Molecular e Celular, Universidade do Porto, 4200-135 Porto, Portugal

\* Correspondence: [anapinto@ua.pt](mailto:anapinto@ua.pt)

# Supplementary Figures

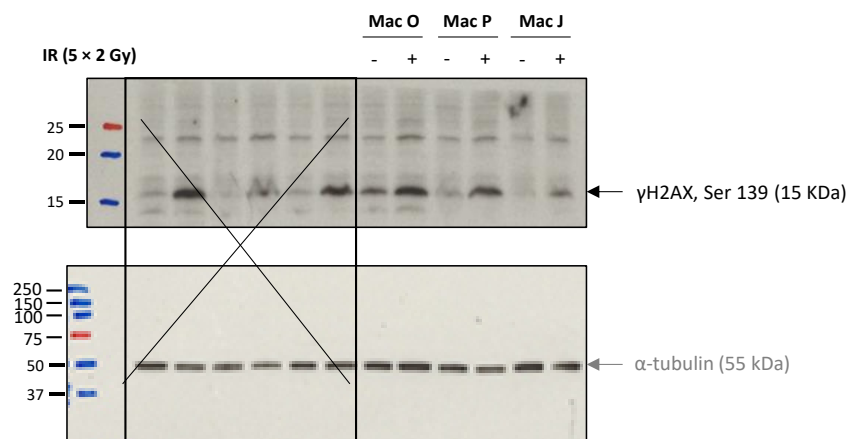

**Figure S1** – Chemiluminescent/scanned images derived from immunoblotting of macrophages nuclear extracts for γH2AX (Ser 139) 40 min after exposure to 5 x 2 Gy IR doses. Loading control: α-tubulin.

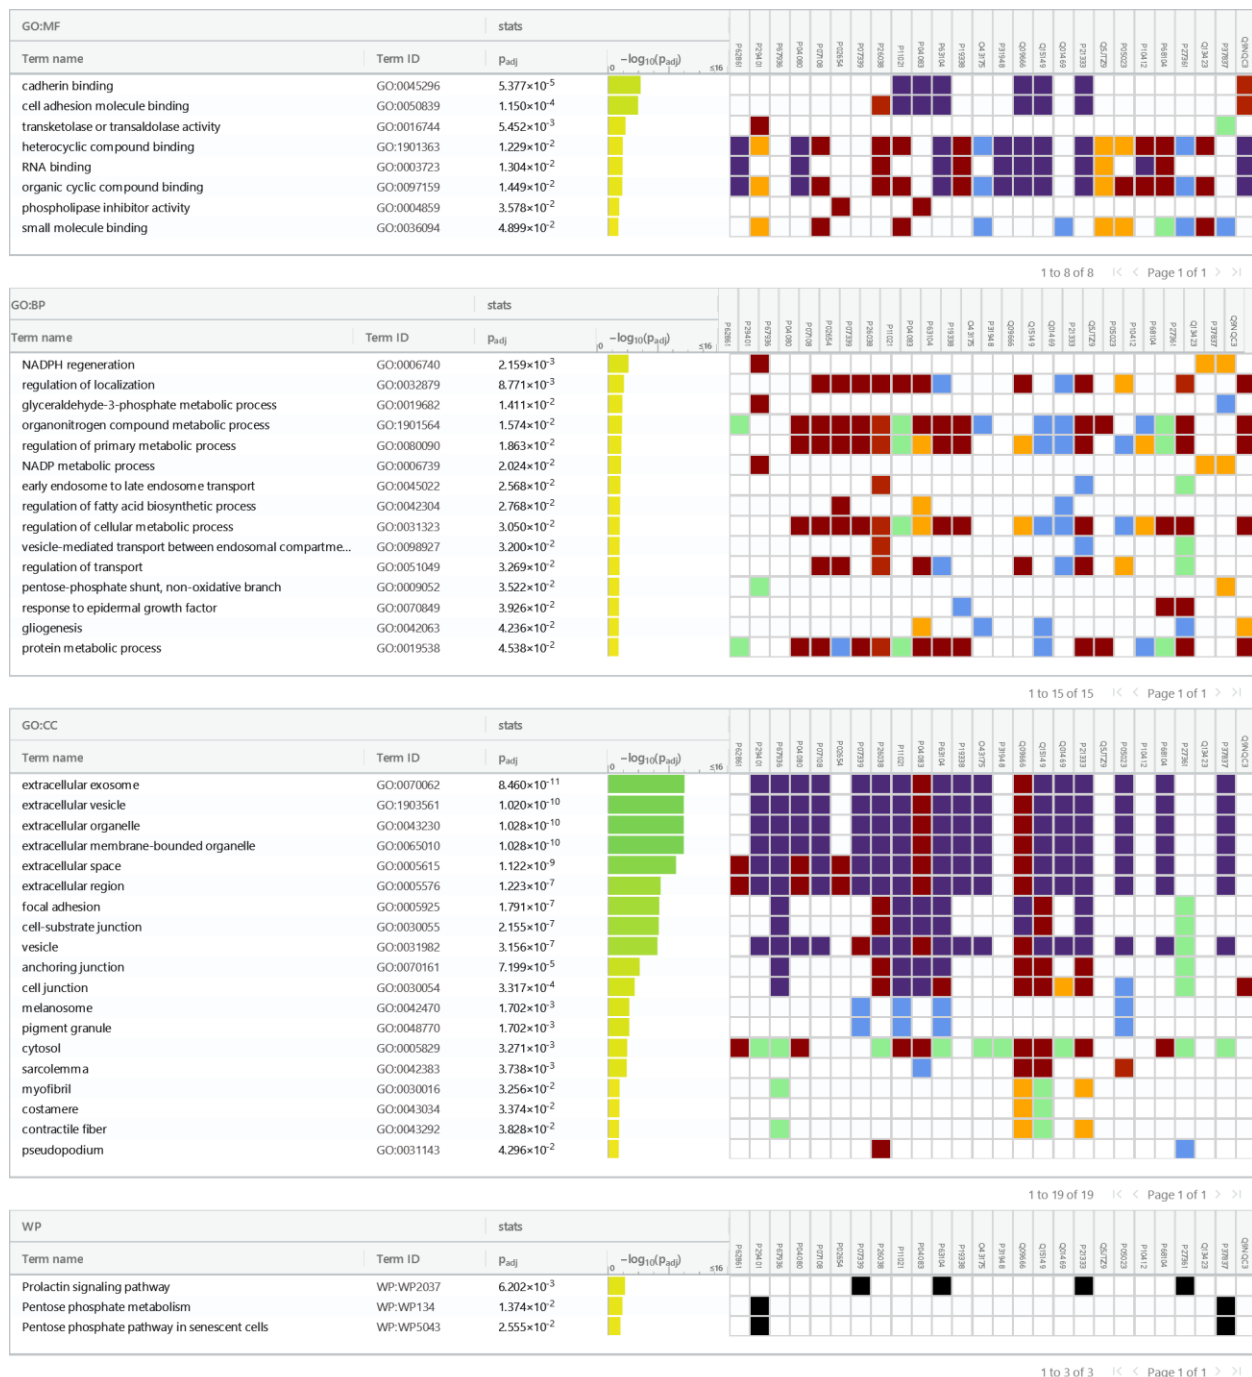

**Figure S2 - Gene Ontology analysis of the proteins differentially expressed between irradiated (5 × 2 Gy) and non-irradiated macrophages.** Data obtained from GProfile (on October 22, 2022). MF: Molecular Function; BP: Biological Process; CC: Cellular Component; WP: WikiPathways. Meaning of the different colors used:

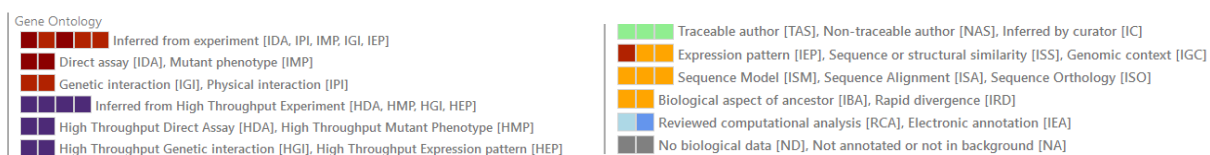



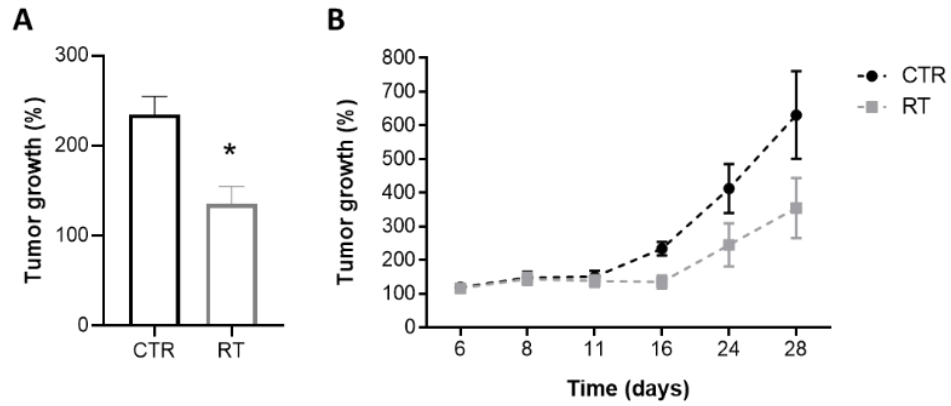

**Figure S5** – Radiotherapy ( $2 \times 5$  Gy) significantly reduced relative tumor growth in 4T1 mouse breast tumor model. The relative (%) tumor growth was calculated based on the normalization of tumor volume ( $\text{mm}^3$ ) at certain time-point to the initial tumor volume for each animal. Graphs depict tumor growth in irradiated animals (RT) (A) at 6 days after irradiation (d16 post-4T1 injection) and (B) tumor progression 4T1 injection until the end of the experiment, when compared with non-irradiated animals (CTR). Data show the mean  $\pm$  SEM. Statistical analysis was performed using two-way ANOVA, Sidak's multiple comparison test, according to [37].

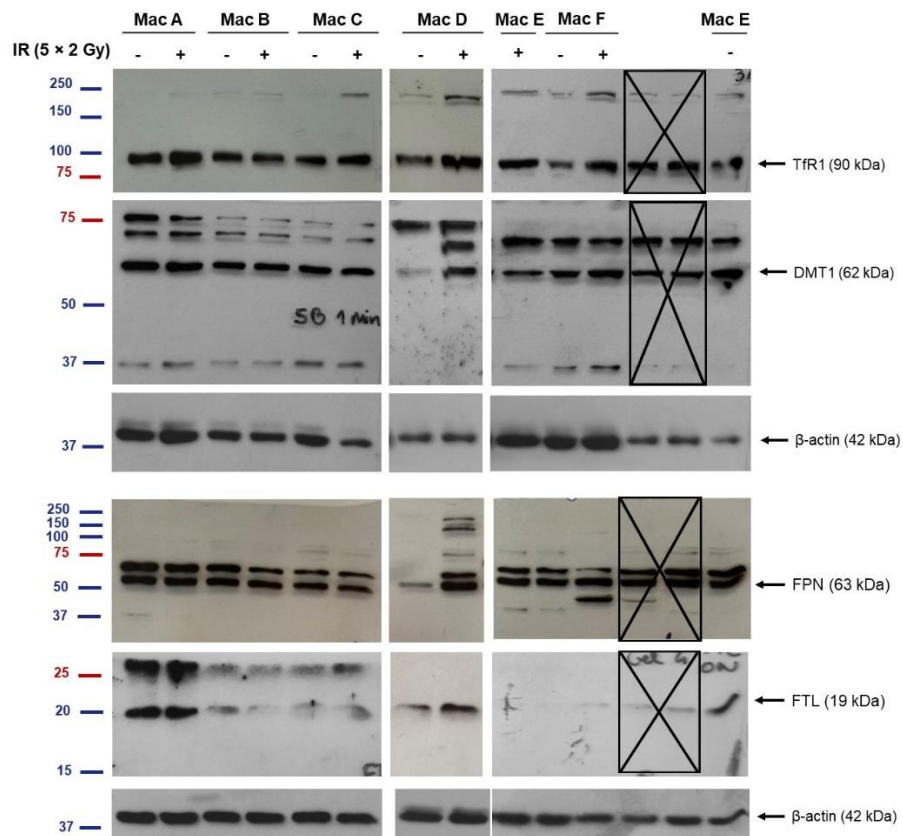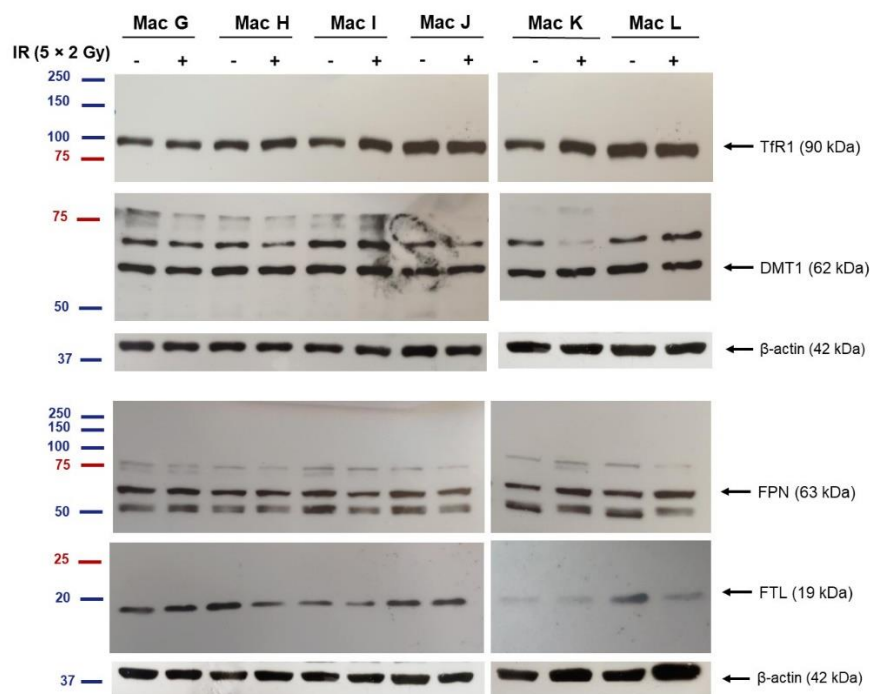



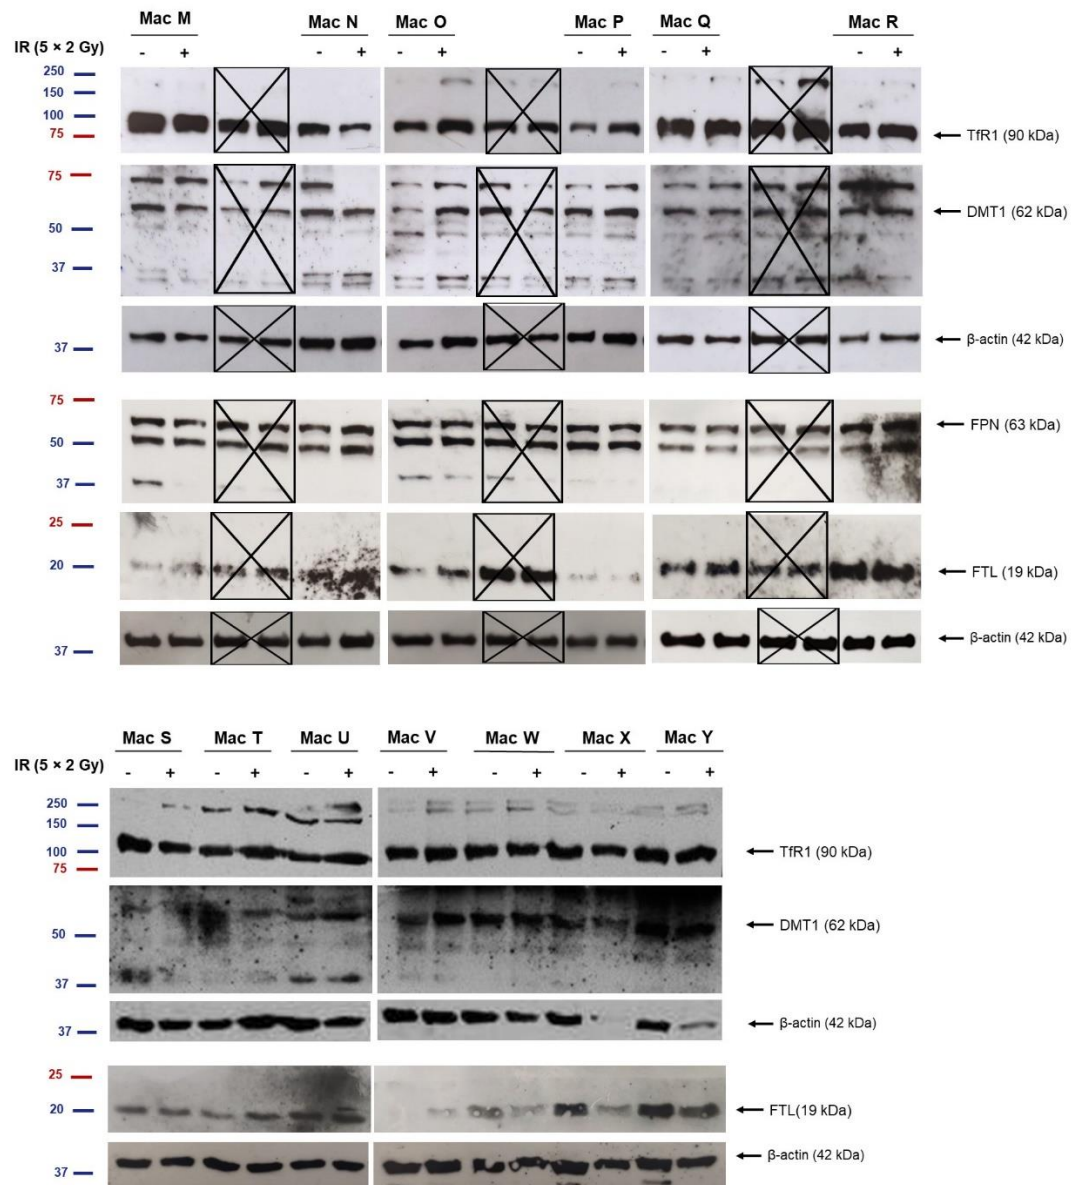

**Figure S6** – Chemiluminescent/scanned images derived from immunoblotting of macrophages whole-cell lysates for TfR1, DMT1, FPN and FTL after exposure to  $5 \times 2$  Gy IR doses. Data were obtained from 5 independent irradiation experiments ( $n = 17-24$  macrophage donors, Mac A-Y). Loading control:  $\beta$ -actin.
