# Supplementary material for: Macrophage Resistance to Ionizing Radiation Exposure Is Accompanied by Decreased Cathepsin D and Increased Transferrin Receptor 1 Expression
Source: Cancers (Basel). 2022 Dec 30;15(1):270. doi: 10.3390/cancers15010270 (PMC9818572; doi:10.3390/cancers15010270)
Supplement: Supplementary file 1 [file cancers-15-00270-s001.zip › cancers-2037154-supplementary/Supplementary Tables.xlsx]

## Sheet: Cover page
Macrophage resistance to ionizing radiation exposure is accompanied by decreased Cathepsin D and increased Transferrin receptor 1 expression
Table of Contents	Page
Supplementary Table S1 - List of proteins identified in irradiated (5 x 2 Gy) and non-irradiated macrophages. Considering 5% local FDR, 1,343 protein groups were identified. Additional information is provided, namely the protein group, unused protein score, total protein score, percentage of sequence coverage, protein accession number and name, protein molecular weight and the number of unique pe…	S1
Supplementary Table S2 - Detailed information on the peptides used to identify proteins.	S2
Supplementary Table S3 - List of proteins quantified in irradiated (5 x 2 Gy) and non-irradiated macrophages. Only proteins with at least 2 peptides used for quantification were considered, totalizing 1,117 protein groups for further analysis.	S3
Supplementary Table S4 - Detailed information on the peptides used to quantify proteins.	S4
Supplementary Table S5 - Detailed information on protein average ratio, after outlier exclusion.	S5

## Sheet: S1
Protein Group	Unused Protein Score	Total Protein Score	% Seq. Cov. (95%)	Accession Number	Accession Name	Accession Name	Molecular Weight (KDa)	Unique Peptides (95% FDR)
1	207.11	207.11	27.69	Q15149	PLEC_HUMAN	Plectin OS=Homo sapiens GN=PLEC PE=1 SV=3	531.791	118
2	172.85	173.19	51.63	Q9Y490	TLN1_HUMAN	Talin-1 OS=Homo sapiens GN=TLN1 PE=1 SV=3	269.767	97
3	166.51	166.69	47.11	P21333	FLNA_HUMAN	Filamin-A OS=Homo sapiens GN=FLNA PE=1 SV=4	280.739	101
4	135.98	136.58	84.98	P08670	VIME_HUMAN	Vimentin OS=Homo sapiens GN=VIM PE=1 SV=4	53.652	85
5	129.88	129.88	92	P60709	ACTB_HUMAN	Actin, cytoplasmic 1 OS=Homo sapiens GN=ACTB PE=1 SV=1	41.737	95
6	129.53	129.54	39.39	Q09666	AHNK_HUMAN	Neuroblast differentiation-associated protein AHNAK OS=Homo sapiens GN=AHNAK PE=1 SV=2	629.101	105
7	121.58	121.74	70.84	P06396	GELS_HUMAN	Gelsolin OS=Homo sapiens GN=GSN PE=1 SV=1	85.698	81
8	105.6	105.6	84.37	P14618	KPYM_HUMAN	Pyruvate kinase isozymes M1/M2 OS=Homo sapiens GN=PKM2 PE=1 SV=4	57.937	61
9	101.66	102.03	34.13	P35579	MYH9_HUMAN	Myosin-9 OS=Homo sapiens GN=MYH9 PE=1 SV=4	226.532	65
10	89.07	89.07	82.39	P04406	G3P_HUMAN	Glyceraldehyde-3-phosphate dehydrogenase OS=Homo sapiens GN=GAPDH PE=1 SV=3	36.053	60
11	88.68	88.86	80.88	P06733	ENOA_HUMAN	Alpha-enolase OS=Homo sapiens GN=ENO1 PE=1 SV=2	47.169	62
12	84.05	84.05	76.11	P07355	ANXA2_HUMAN	Annexin A2 OS=Homo sapiens GN=ANXA2 PE=1 SV=2	38.604	47
13	81.02	81.4	72.09	P13796	PLSL_HUMAN	Plastin-2 OS=Homo sapiens GN=LCP1 PE=1 SV=6	70.288	50
14	77.71	77.88	62.39	P26038	MOES_HUMAN	Moesin OS=Homo sapiens GN=MSN PE=1 SV=3	67.82	41
15	72.76	72.76	65.23	P40121	CAPG_HUMAN	Macrophage-capping protein OS=Homo sapiens GN=CAPG PE=1 SV=2	38.499	51
16	70.17	70.18	48.14	P13639	EF2_HUMAN	Elongation factor 2 OS=Homo sapiens GN=EEF2 PE=1 SV=4	95.338	35
17	67.43	67.57	71.37	P67936	TPM4_HUMAN	Tropomyosin alpha-4 chain OS=Homo sapiens GN=TPM4 PE=1 SV=3	28.522	36
18	67.11	67.28	55.83	P55072	TERA_HUMAN	Transitional endoplasmic reticulum ATPase OS=Homo sapiens GN=VCP PE=1 SV=4	89.322	43
19	66.01	66.41	50.62	Q14764	MVP_HUMAN	Major vault protein OS=Homo sapiens GN=MVP PE=1 SV=4	99.327	39
20	65.01	65.02	52.75	P11021	GRP78_HUMAN	78 kDa glucose-regulated protein OS=Homo sapiens GN=HSPA5 PE=1 SV=2	72.333	38
21	64.83	65.49	57.69	P25705	ATPA_HUMAN	ATP synthase subunit alpha, mitochondrial OS=Homo sapiens GN=ATP5A1 PE=1 SV=1	59.751	38
22	63.89	64.73	32.83	P46940	IQGA1_HUMAN	Ras GTPase-activating-like protein IQGAP1 OS=Homo sapiens GN=IQGAP1 PE=1 SV=1	189.252	44
23	60.26	60.26	61.36	Q15942	ZYX_HUMAN	Zyxin OS=Homo sapiens GN=ZYX PE=1 SV=1	61.277	36
24	60.11	60.38	50.22	P38646	GRP75_HUMAN	Stress-70 protein, mitochondrial OS=Homo sapiens GN=HSPA9 PE=1 SV=2	73.68	34
25	58.01	58.31	70.52	P04083	ANXA1_HUMAN	Annexin A1 OS=Homo sapiens GN=ANXA1 PE=1 SV=2	38.714	30
26	57.14	57.14	80	P62937	PPIA_HUMAN	Peptidyl-prolyl cis-trans isomerase A OS=Homo sapiens GN=PPIA PE=1 SV=2	18.012	40
27	56.9	57.09	72.02	P06576	ATPB_HUMAN	ATP synthase subunit beta, mitochondrial OS=Homo sapiens GN=ATP5B PE=1 SV=3	56.56	34
28	55.35	55.35	69.78	P04075	ALDOA_HUMAN	Fructose-bisphosphate aldolase A OS=Homo sapiens GN=ALDOA PE=1 SV=2	39.42	34
29	55.02	55.42	69.47	P21281	VATB2_HUMAN	V-type proton ATPase subunit B, brain isoform OS=Homo sapiens GN=ATP6V1B2 PE=1 SV=3	56.501	31
30	54.25	54.73	21.79	Q9NZM1	MYOF_HUMAN	Myoferlin OS=Homo sapiens GN=MYOF PE=1 SV=1	234.709	35
31	54.12	54.32	33.55	P22314	UBA1_HUMAN	Ubiquitin-like modifier-activating enzyme 1 OS=Homo sapiens GN=UBA1 PE=1 SV=3	117.849	29
32	53.71	53.89	45.96	P12814	ACTN1_HUMAN	Alpha-actinin-1 OS=Homo sapiens GN=ACTN1 PE=1 SV=2	103.058	36
33	52.84	53.02	58.88	P09467	F16P1_HUMAN	Fructose-1,6-bisphosphatase 1 OS=Homo sapiens GN=FBP1 PE=1 SV=5	36.842	32
34	52.64	60.81	57.43	P11142	HSP7C_HUMAN	Heat shock cognate 71 kDa protein OS=Homo sapiens GN=HSPA8 PE=1 SV=1	70.898	36
35	52.25	52.37	42.08	P07900	HS90A_HUMAN	Heat shock protein HSP 90-alpha OS=Homo sapiens GN=HSP90AA1 PE=1 SV=5	84.66	30
36	52.19	52.3	50.39	P07237	PDIA1_HUMAN	Protein disulfide-isomerase OS=Homo sapiens GN=P4HB PE=1 SV=3	57.116	27
37	49.56	49.56	49.81	Q14847	LASP1_HUMAN	LIM and SH3 domain protein 1 OS=Homo sapiens GN=LASP1 PE=1 SV=2	29.717	30
38	49.36	49.39	37.97	P05107	ITB2_HUMAN	Integrin beta-2 OS=Homo sapiens GN=ITGB2 PE=1 SV=2	84.782	23
39	49.34	49.36	42.48	P07858	CATB_HUMAN	Cathepsin B OS=Homo sapiens GN=CTSB PE=1 SV=3	37.822	29
40	48.52	48.54	42.26	P51659	DHB4_HUMAN	Peroxisomal multifunctional enzyme type 2 OS=Homo sapiens GN=HSD17B4 PE=1 SV=3	79.686	25
41	47.7	47.7	69.3	P00558	PGK1_HUMAN	Phosphoglycerate kinase 1 OS=Homo sapiens GN=PGK1 PE=1 SV=3	44.615	29
42	46.51	46.81	45.06	P38606	VATA_HUMAN	V-type proton ATPase catalytic subunit A OS=Homo sapiens GN=ATP6V1A PE=1 SV=2	68.304	25
43	45.64	45.7	73.26	P68371	TBB4B_HUMAN	Tubulin beta-4B chain OS=Homo sapiens GN=TUBB4B PE=1 SV=1	49.831	30
44	45.56	46.24	31.28	Q9P2E9	RRBP1_HUMAN	Ribosome-binding protein 1 OS=Homo sapiens GN=RRBP1 PE=1 SV=4	152.472	26
45	42.98	43.36	45.94	Q16822	PCKGM_HUMAN	Phosphoenolpyruvate carboxykinase [GTP], mitochondrial OS=Homo sapiens GN=PCK2 PE=1 SV=3	70.73	26
46	42.63	43.05	68.12	P08758	ANXA5_HUMAN	Annexin A5 OS=Homo sapiens GN=ANXA5 PE=1 SV=2	35.937	24
47	42.41	42.53	68.53	P60174	TPIS_HUMAN	Triosephosphate isomerase OS=Homo sapiens GN=TPI1 PE=1 SV=3	30.791	23
48	42.05	42.33	44.43	P40939	ECHA_HUMAN	Trifunctional enzyme subunit alpha, mitochondrial OS=Homo sapiens GN=HADHA PE=1 SV=2	83	29
49	42.02	42.08	34.18	Q7KZF4	SND1_HUMAN	Staphylococcal nuclease domain-containing protein 1 OS=Homo sapiens GN=SND1 PE=1 SV=1	101.997	25
50	41.81	42.18	43.55	P00367	DHE3_HUMAN	Glutamate dehydrogenase 1, mitochondrial OS=Homo sapiens GN=GLUD1 PE=1 SV=2	61.398	23
51	41.71	43.49	30.51	P14625	ENPL_HUMAN	Endoplasmin OS=Homo sapiens GN=HSP90B1 PE=1 SV=1	92.469	24
52	41.62	42.03	24.05	P11215	ITAM_HUMAN	Integrin alpha-M OS=Homo sapiens GN=ITGAM PE=1 SV=2	127.179	23
53	41.13	41.62	27.74	P52790	HXK3_HUMAN	Hexokinase-3 OS=Homo sapiens GN=HK3 PE=1 SV=2	99.025	28
54	39.83	41.52	45.35	P30101	PDIA3_HUMAN	Protein disulfide-isomerase A3 OS=Homo sapiens GN=PDIA3 PE=1 SV=4	56.782	23
55	39.6	40.01	49.33	Q86UX7	URP2_HUMAN	Fermitin family homolog 3 OS=Homo sapiens GN=FERMT3 PE=1 SV=1	75.953	23
56	37.99	38.52	28.64	P05023	AT1A1_HUMAN	Sodium/potassium-transporting ATPase subunit alpha-1 OS=Homo sapiens GN=ATP1A1 PE=1 SV=1	112.896	24
57	36.49	36.59	45.02	P19971	TYPH_HUMAN	Thymidine phosphorylase OS=Homo sapiens GN=TYMP PE=1 SV=2	49.955	18
58	36.39	36.53	46.82	Q99536	VAT1_HUMAN	Synaptic vesicle membrane protein VAT-1 homolog OS=Homo sapiens GN=VAT1 PE=1 SV=2	41.92	19
59	36.33	36.46	47.09	P07339	CATD_HUMAN	Cathepsin D OS=Homo sapiens GN=CTSD PE=1 SV=1	44.552	24
60	36.13	36.67	49.31	P50995	ANX11_HUMAN	Annexin A11 OS=Homo sapiens GN=ANXA11 PE=1 SV=1	54.39	24
61	35.7	35.7	80.9	P37802	TAGL2_HUMAN	Transgelin-2 OS=Homo sapiens GN=TAGLN2 PE=1 SV=3	22.391	24
62	35.68	35.68	73.47	P63104	1433Z_HUMAN	14-3-3 protein zeta/delta OS=Homo sapiens GN=YWHAZ PE=1 SV=1	27.745	20
63	35.38	35.6	34.23	Q99798	ACON_HUMAN	Aconitate hydratase, mitochondrial OS=Homo sapiens GN=ACO2 PE=1 SV=2	85.425	21
64	35.36	35.62	35.54	P02545	LMNA_HUMAN	Prelamin-A/C OS=Homo sapiens GN=LMNA PE=1 SV=1	74.139	23
65	35.23	35.45	47.29	P10809	CH60_HUMAN	60 kDa heat shock protein, mitochondrial OS=Homo sapiens GN=HSPD1 PE=1 SV=2	61.055	25
66	35.04	35.2	31.3	P29401	TKT_HUMAN	Transketolase OS=Homo sapiens GN=TKT PE=1 SV=3	67.878	20
67	34.92	35.12	44.2	O75874	IDHC_HUMAN	Isocitrate dehydrogenase [NADP] cytoplasmic OS=Homo sapiens GN=IDH1 PE=1 SV=2	46.659	18
68	34.68	35.07	6.995	Q14204	DYHC1_HUMAN	Cytoplasmic dynein 1 heavy chain 1 OS=Homo sapiens GN=DYNC1H1 PE=1 SV=5	532.408	26
69	33.14	33.77	25.57	P18206	VINC_HUMAN	Vinculin OS=Homo sapiens GN=VCL PE=1 SV=4	123.799	24
70	32.82	32.94	78.57	P07737	PROF1_HUMAN	Profilin-1 OS=Homo sapiens GN=PFN1 PE=1 SV=2	15.054	27
71	32.7	32.79	58.28	P40926	MDHM_HUMAN	Malate dehydrogenase, mitochondrial OS=Homo sapiens GN=MDH2 PE=1 SV=3	35.503	18
72	32.54	32.61	56.68	O60664	PLIN3_HUMAN	Perilipin-3 OS=Homo sapiens GN=PLIN3 PE=1 SV=3	47.075	18
73	32.46	32.46	40.26	P68104	EF1A1_HUMAN	Elongation factor 1-alpha 1 OS=Homo sapiens GN=EEF1A1 PE=1 SV=1	50.141	22
74	32.39	32.56	56.78	P02649	APOE_HUMAN	Apolipoprotein E OS=Homo sapiens GN=APOE PE=1 SV=1	36.154	18
75	32.15	32.36	22.83	Q9BSJ8	ESYT1_HUMAN	Extended synaptotagmin-1 OS=Homo sapiens GN=ESYT1 PE=1 SV=1	122.856	18
76	32.03	32.04	53.95	Q9UJU6	DBNL_HUMAN	Drebrin-like protein OS=Homo sapiens GN=DBNL PE=1 SV=1	48.207	22
77	31.73	32.35	22.41	P11498	PYC_HUMAN	Pyruvate carboxylase, mitochondrial OS=Homo sapiens GN=PC PE=1 SV=2	129.634	21
78	31.65	31.85	39.51	Q16555	DPYL2_HUMAN	Dihydropyrimidinase-related protein 2 OS=Homo sapiens GN=DPYSL2 PE=1 SV=1	62.294	18
79	31.5	31.5	50.6	P40925	MDHC_HUMAN	Malate dehydrogenase, cytoplasmic OS=Homo sapiens GN=MDH1 PE=1 SV=4	36.426	19
80	31.36	31.36	55.16	Q01518	CAP1_HUMAN	Adenylyl cyclase-associated protein 1 OS=Homo sapiens GN=CAP1 PE=1 SV=5	51.901	22
81	30.91	45.51	48.05	P08107	HSP71_HUMAN	Heat shock 70 kDa protein 1A/1B OS=Homo sapiens GN=HSPA1A PE=1 SV=5	70.052	19
82	30.79	30.89	43.46	P68363	TBA1B_HUMAN	Tubulin alpha-1B chain OS=Homo sapiens GN=TUBA1B PE=1 SV=1	50.152	17
83	30.67	30.8	44.89	Q9Y6N5	SQRD_HUMAN	Sulfide:quinone oxidoreductase, mitochondrial OS=Homo sapiens GN=SQRDL PE=1 SV=1	49.961	16
84	30.59	30.79	48.2	P23381	SYWC_HUMAN	Tryptophan--tRNA ligase, cytoplasmic OS=Homo sapiens GN=WARS PE=1 SV=2	53.165	21
85	30.58	30.59	60.84	P23528	COF1_HUMAN	Cofilin-1 OS=Homo sapiens GN=CFL1 PE=1 SV=3	18.502	19
86	30.48	30.53	53.94	P18669	PGAM1_HUMAN	Phosphoglycerate mutase 1 OS=Homo sapiens GN=PGAM1 PE=1 SV=2	28.804	17
87	29.31	29.61	37.98	P50395	GDIB_HUMAN	Rab GDP dissociation inhibitor beta OS=Homo sapiens GN=GDI2 PE=1 SV=2	50.663	17
88	29.3	29.65	41.23	P28838	AMPL_HUMAN	Cytosol aminopeptidase OS=Homo sapiens GN=LAP3 PE=1 SV=3	56.166	19
89	29.09	30.98	15.46	Q00610	CLH1_HUMAN	Clathrin heavy chain 1 OS=Homo sapiens GN=CLTC PE=1 SV=5	191.615	18
90	28.97	29.42	29.09	P11940	PABP1_HUMAN	Polyadenylate-binding protein 1 OS=Homo sapiens GN=PABPC1 PE=1 SV=2	70.671	17
91	28.92	29.27	26.52	P31948	STIP1_HUMAN	Stress-induced-phosphoprotein 1 OS=Homo sapiens GN=STIP1 PE=1 SV=1	62.639	16
92	28.8	28.94	52.15	P61158	ARP3_HUMAN	Actin-related protein 3 OS=Homo sapiens GN=ACTR3 PE=1 SV=3	47.371	18
93	28.69	28.85	28.85	P14780	MMP9_HUMAN	Matrix metalloproteinase-9 OS=Homo sapiens GN=MMP9 PE=1 SV=3	78.458	16
94	28.29	28.66	23.21	P11586	C1TC_HUMAN	C-1-tetrahydrofolate synthase, cytoplasmic OS=Homo sapiens GN=MTHFD1 PE=1 SV=3	101.559	20
95	28.19	28.19	74.15	P04792	HSPB1_HUMAN	Heat shock protein beta-1 OS=Homo sapiens GN=HSPB1 PE=1 SV=2	22.783	26
96	27.78	53.14	45.44	P08238	HS90B_HUMAN	Heat shock protein HSP 90-beta OS=Homo sapiens GN=HSP90AB1 PE=1 SV=4	83.264	17
97	27.61	28.06	21.08	Q8WUM4	PDC6I_HUMAN	Programmed cell death 6-interacting protein OS=Homo sapiens GN=PDCD6IP PE=1 SV=1	96.023	15
98	27.3	27.69	20.59	Q0VD83	APOBR_HUMAN	Apolipoprotein B receptor OS=Homo sapiens GN=APOBR PE=1 SV=1	114.874	16
99	27.06	27.22	36.12	P11413	G6PD_HUMAN	Glucose-6-phosphate 1-dehydrogenase OS=Homo sapiens GN=G6PD PE=1 SV=4	59.257	17
100	27	27.06	33.88	P09960	LKHA4_HUMAN	Leukotriene A-4 hydrolase OS=Homo sapiens GN=LTA4H PE=1 SV=2	69.285	19
101	26.87	26.87	55.78	Q06830	PRDX1_HUMAN	Peroxiredoxin-1 OS=Homo sapiens GN=PRDX1 PE=1 SV=1	22.11	15
102	26.73	26.82	39.34	P52209	6PGD_HUMAN	6-phosphogluconate dehydrogenase, decarboxylating OS=Homo sapiens GN=PGD PE=1 SV=3	53.14	17
103	26.68	30.67	47.65	P09525	ANXA4_HUMAN	Annexin A4 OS=Homo sapiens GN=ANXA4 PE=1 SV=4	35.883	15
104	25.9	26.07	31.48	P14317	HCLS1_HUMAN	Hematopoietic lineage cell-specific protein OS=Homo sapiens GN=HCLS1 PE=1 SV=3	54.014	16
105	25.5	25.51	76.3	Q01469	FABP5_HUMAN	Fatty acid-binding protein, epidermal OS=Homo sapiens GN=FABP5 PE=1 SV=3	15.164	12
106	24.38	24.63	16.27	P36776	LONM_HUMAN	Lon protease homolog, mitochondrial OS=Homo sapiens GN=LONP1 PE=1 SV=2	106.489	14
107	24.35	24.57	22.52	P29350	PTN6_HUMAN	Tyrosine-protein phosphatase non-receptor type 6 OS=Homo sapiens GN=PTPN6 PE=1 SV=1	67.561	13
108	24.32	25.05	14.09	Q14697	GANAB_HUMAN	Neutral alpha-glucosidase AB OS=Homo sapiens GN=GANAB PE=1 SV=3	106.874	16
109	24.17	24.26	28.69	P55084	ECHB_HUMAN	Trifunctional enzyme subunit beta, mitochondrial OS=Homo sapiens GN=HADHB PE=1 SV=3	51.294	15
110	24.01	28.62	16.51	P20702	ITAX_HUMAN	Integrin alpha-X OS=Homo sapiens GN=ITGAX PE=1 SV=3	127.829	13
111	23.95	24.35	37.71	Q07065	CKAP4_HUMAN	Cytoskeleton-associated protein 4 OS=Homo sapiens GN=CKAP4 PE=1 SV=2	66.022	19
112	23.9	24.18	26.12	P41250	SYG_HUMAN	Glycine--tRNA ligase OS=Homo sapiens GN=GARS PE=1 SV=3	83.166	14
113	23.75	23.92	15.38	Q13423	NNTM_HUMAN	NAD(P) transhydrogenase, mitochondrial OS=Homo sapiens GN=NNT PE=1 SV=3	113.896	16
114	23.52	23.66	54.18	Q99623	PHB2_HUMAN	Prohibitin-2 OS=Homo sapiens GN=PHB2 PE=1 SV=2	33.296	15
115	23.5	23.64	20.7	P21399	ACOC_HUMAN	Cytoplasmic aconitate hydratase OS=Homo sapiens GN=ACO1 PE=1 SV=3	98.399	14
116	23.45	23.52	30.46	P36957	ODO2_HUMAN	Dihydrolipoyllysine-residue succinyltransferase component of 2-oxoglutarate dehydrogenase complex, mitochondrial OS=Homo sapiens GN=DLST PE=1 SV=4	48.755	13
117	23.4	23.77	44.33	Q9BWD1	THIC_HUMAN	Acetyl-CoA acetyltransferase, cytosolic OS=Homo sapiens GN=ACAT2 PE=1 SV=2	41.351	14
118	23.36	23.42	37.71	P31930	QCR1_HUMAN	Cytochrome b-c1 complex subunit 1, mitochondrial OS=Homo sapiens GN=UQCRC1 PE=1 SV=3	52.646	12
119	23.35	37.65	36.69	P15311	EZRI_HUMAN	Ezrin OS=Homo sapiens GN=EZR PE=1 SV=4	69.413	14
120	23.13	23.22	23	Q9Y3Z3	SAMH1_HUMAN	SAM domain and HD domain-containing protein 1 OS=Homo sapiens GN=SAMHD1 PE=1 SV=2	72.201	14
121	22.79	22.79	28.13	O60749	SNX2_HUMAN	Sorting nexin-2 OS=Homo sapiens GN=SNX2 PE=1 SV=2	58.471	13
122	22.55	23.04	41.59	Q9UI08	EVL_HUMAN	Ena/VASP-like protein OS=Homo sapiens GN=EVL PE=1 SV=2	44.62	13
123	22.41	22.53	28.64	Q15084	PDIA6_HUMAN	Protein disulfide-isomerase A6 OS=Homo sapiens GN=PDIA6 PE=1 SV=1	48.121	14
124	22.36	22.51	38.2	Q13231	CHIT1_HUMAN	Chitotriosidase-1 OS=Homo sapiens GN=CHIT1 PE=1 SV=1	51.681	14
125	22.21	23.23	48.15	P23284	PPIB_HUMAN	Peptidyl-prolyl cis-trans isomerase B OS=Homo sapiens GN=PPIB PE=1 SV=2	23.743	11
126	22.1	22.73	22.58	P06744	G6PI_HUMAN	Glucose-6-phosphate isomerase OS=Homo sapiens GN=GPI PE=1 SV=4	63.147	13
127	22.09	22.29	34.13	P61978	HNRPK_HUMAN	Heterogeneous nuclear ribonucleoprotein K OS=Homo sapiens GN=HNRNPK PE=1 SV=1	50.976	16
128	22.02	22.25	31.84	Q8TD55	PKHO2_HUMAN	Pleckstrin homology domain-containing family O member 2 OS=Homo sapiens GN=PLEKHO2 PE=1 SV=1	53.35	15
129	21.75	21.82	37.66	Q13561	DCTN2_HUMAN	Dynactin subunit 2 OS=Homo sapiens GN=DCTN2 PE=1 SV=4	44.231	13
130	21.69	31.58	52.23	P61981	1433G_HUMAN	14-3-3 protein gamma OS=Homo sapiens GN=YWHAG PE=1 SV=2	28.303	11
131	21.6	21.83	30.91	P31939	PUR9_HUMAN	Bifunctional purine biosynthesis protein PURH OS=Homo sapiens GN=ATIC PE=1 SV=3	64.616	14
132	21.45	21.81	35.91	P37837	TALDO_HUMAN	Transaldolase OS=Homo sapiens GN=TALDO1 PE=1 SV=2	37.54	13
133	21.3	21.56	26.97	P49368	TCPG_HUMAN	T-complex protein 1 subunit gamma OS=Homo sapiens GN=CCT3 PE=1 SV=4	60.534	14
134	21.28	21.49	22.74	P20810	ICAL_HUMAN	Calpastatin OS=Homo sapiens GN=CAST PE=1 SV=4	76.573	12
135	21.12	21.26	23.46	P23368	MAOM_HUMAN	NAD-dependent malic enzyme, mitochondrial OS=Homo sapiens GN=ME2 PE=1 SV=1	65.444	13
136	21.1	21.1	54.8	P17931	LEG3_HUMAN	Galectin-3 OS=Homo sapiens GN=LGALS3 PE=1 SV=5	26.152	13
137	20.96	21.5	74.44	P05413	FABPH_HUMAN	Fatty acid-binding protein, heart OS=Homo sapiens GN=FABP3 PE=1 SV=4	14.858	13
138	20.9	21.32	19.17	P08133	ANXA6_HUMAN	Annexin A6 OS=Homo sapiens GN=ANXA6 PE=1 SV=3	75.873	12
139	20.85	21.5	15.53	O00754	MA2B1_HUMAN	Lysosomal alpha-mannosidase OS=Homo sapiens GN=MAN2B1 PE=1 SV=3	113.744	13
140	20.73	20.77	31.88	P21980	TGM2_HUMAN	Protein-glutamine gamma-glutamyltransferase 2 OS=Homo sapiens GN=TGM2 PE=1 SV=2	77.329	19
141	20.69	21.2	12.81	Q9Y4L1	HYOU1_HUMAN	Hypoxia up-regulated protein 1 OS=Homo sapiens GN=HYOU1 PE=1 SV=1	111.335	10
142	20.6	20.74	48.31	P14550	AK1A1_HUMAN	Alcohol dehydrogenase [NADP(+)] OS=Homo sapiens GN=AKR1A1 PE=1 SV=3	36.573	13
143	20.57	20.65	52.24	O00764	PDXK_HUMAN	Pyridoxal kinase OS=Homo sapiens GN=PDXK PE=1 SV=1	35.102	13
144	20.54	21.04	11.73	Q02218	ODO1_HUMAN	2-oxoglutarate dehydrogenase, mitochondrial OS=Homo sapiens GN=OGDH PE=1 SV=3	115.935	12
145	20.53	20.56	43.38	Q96CX2	KCD12_HUMAN	BTB/POZ domain-containing protein KCTD12 OS=Homo sapiens GN=KCTD12 PE=1 SV=1	35.701	13
146	20.51	20.81	29.71	P08567	PLEK_HUMAN	Pleckstrin OS=Homo sapiens GN=PLEK PE=1 SV=3	40.125	14
147	20.23	20.3	26.46	P36578	RL4_HUMAN	60S ribosomal protein L4 OS=Homo sapiens GN=RPL4 PE=1 SV=5	47.697	11
148	20.11	20.14	31.41	P27797	CALR_HUMAN	Calreticulin OS=Homo sapiens GN=CALR PE=1 SV=1	48.142	12
149	20.03	20.16	55.06	Q15365	PCBP1_HUMAN	Poly(rC)-binding protein 1 OS=Homo sapiens GN=PCBP1 PE=1 SV=2	37.498	13
150	19.95	21.19	10.08	O94979	SC31A_HUMAN	Protein transport protein Sec31A OS=Homo sapiens GN=SEC31A PE=1 SV=3	133.015	10
151	19.95	20.06	26.55	Q02318	CP27A_HUMAN	Sterol 26-hydroxylase, mitochondrial OS=Homo sapiens GN=CYP27A1 PE=1 SV=1	60.235	13
152	19.91	19.91	76.81	P29373	RABP2_HUMAN	Cellular retinoic acid-binding protein 2 OS=Homo sapiens GN=CRABP2 PE=1 SV=2	15.693	13
153	19.88	19.94	49.63	P35232	PHB_HUMAN	Prohibitin OS=Homo sapiens GN=PHB PE=1 SV=1	29.804	12
154	19.62	19.69	41.99	P29692	EF1D_HUMAN	Elongation factor 1-delta OS=Homo sapiens GN=EEF1D PE=1 SV=5	31.122	11
155	19.52	20.18	25.6	P34897	GLYM_HUMAN	Serine hydroxymethyltransferase, mitochondrial OS=Homo sapiens GN=SHMT2 PE=1 SV=3	55.993	12
156	19.41	21.7	9.381	Q04637	IF4G1_HUMAN	Eukaryotic translation initiation factor 4 gamma 1 OS=Homo sapiens GN=EIF4G1 PE=1 SV=4	175.491	12
157	19.19	19.19	58.22	P48047	ATPO_HUMAN	ATP synthase subunit O, mitochondrial OS=Homo sapiens GN=ATP5O PE=1 SV=1	23.277	10
158	19.13	19.26	27.29	Q92945	FUBP2_HUMAN	Far upstream element-binding protein 2 OS=Homo sapiens GN=KHSRP PE=1 SV=4	73.115	16
159	18.95	19.32	29.24	Q9BR76	COR1B_HUMAN	Coronin-1B OS=Homo sapiens GN=CORO1B PE=1 SV=1	54.235	12
160	18.94	19.32	18.19	Q9Y5S1	TRPV2_HUMAN	Transient receptor potential cation channel subfamily V member 2 OS=Homo sapiens GN=TRPV2 PE=1 SV=1	85.981	10
161	18.92	19.02	15.71	P34932	HSP74_HUMAN	Heat shock 70 kDa protein 4 OS=Homo sapiens GN=HSPA4 PE=1 SV=4	94.331	10
162	18.88	19.53	11.21	Q68CZ2	TENS3_HUMAN	Tensin-3 OS=Homo sapiens GN=TNS3 PE=1 SV=2	155.266	10
163	18.83	18.96	53.17	P62820	RAB1A_HUMAN	Ras-related protein Rab-1A OS=Homo sapiens GN=RAB1A PE=1 SV=3	22.678	10
164	18.82	29.5	8.57	O75369	FLNB_HUMAN	Filamin-B OS=Homo sapiens GN=FLNB PE=1 SV=2	278.164	12
165	18.81	18.81	93.14	P61604	CH10_HUMAN	10 kDa heat shock protein, mitochondrial OS=Homo sapiens GN=HSPE1 PE=1 SV=2	10.932	12
166	18.8	19.08	29.42	P49411	EFTU_HUMAN	Elongation factor Tu, mitochondrial OS=Homo sapiens GN=TUFM PE=1 SV=2	49.542	11
167	18.78	21.76	30.71	P61160	ARP2_HUMAN	Actin-related protein 2 OS=Homo sapiens GN=ACTR2 PE=1 SV=1	44.761	9
168	18.76	18.82	37.1	Q15056	IF4H_HUMAN	Eukaryotic translation initiation factor 4H OS=Homo sapiens GN=EIF4H PE=1 SV=5	27.385	10
169	18.67	18.71	16.58	P52272	HNRPM_HUMAN	Heterogeneous nuclear ribonucleoprotein M OS=Homo sapiens GN=HNRNPM PE=1 SV=3	77.516	11
170	18.64	19.64	7.657	Q01082	SPTB2_HUMAN	Spectrin beta chain, brain 1 OS=Homo sapiens GN=SPTBN1 PE=1 SV=2	274.609	14
171	18.61	18.84	50	O14818	PSA7_HUMAN	Proteasome subunit alpha type-7 OS=Homo sapiens GN=PSMA7 PE=1 SV=1	27.887	9
172	18.6	31.6	67.26	Q9BUF5	TBB6_HUMAN	Tubulin beta-6 chain OS=Homo sapiens GN=TUBB6 PE=1 SV=1	49.857	15
173	18.51	25.24	19.63	P19367	HXK1_HUMAN	Hexokinase-1 OS=Homo sapiens GN=HK1 PE=1 SV=3	102.486	14
174	18.46	18.58	45.1	P46782	RS5_HUMAN	40S ribosomal protein S5 OS=Homo sapiens GN=RPS5 PE=1 SV=4	22.876	9
175	18.46	18.53	27.34	P07686	HEXB_HUMAN	Beta-hexosaminidase subunit beta OS=Homo sapiens GN=HEXB PE=1 SV=3	63.111	13
176	18.39	18.6	9.922	Q15075	EEA1_HUMAN	Early endosome antigen 1 OS=Homo sapiens GN=EEA1 PE=1 SV=2	162.466	13
177	18.39	18.44	71.13	Q14019	COTL1_HUMAN	Coactosin-like protein OS=Homo sapiens GN=COTL1 PE=1 SV=3	15.945	11
178	18.35	18.51	62.07	P39019	RS19_HUMAN	40S ribosomal protein S19 OS=Homo sapiens GN=RPS19 PE=1 SV=2	16.06	12
179	18.28	18.65	20.09	O00571	DDX3X_HUMAN	ATP-dependent RNA helicase DDX3X OS=Homo sapiens GN=DDX3X PE=1 SV=3	73.243	12
180	18.28	18.31	42.89	P50552	VASP_HUMAN	Vasodilator-stimulated phosphoprotein OS=Homo sapiens GN=VASP PE=1 SV=3	39.83	10
181	18.27	18.41	54.16	P42765	THIM_HUMAN	3-ketoacyl-CoA thiolase, mitochondrial OS=Homo sapiens GN=ACAA2 PE=1 SV=2	41.924	12
182	18.23	18.74	22.78	P31146	COR1A_HUMAN	Coronin-1A OS=Homo sapiens GN=CORO1A PE=1 SV=4	51.026	11
183	18.2	18.2	45	P00918	CAH2_HUMAN	Carbonic anhydrase 2 OS=Homo sapiens GN=CA2 PE=1 SV=2	29.246	11
184	18.17	18.23	47.29	P16152	CBR1_HUMAN	Carbonyl reductase [NADPH] 1 OS=Homo sapiens GN=CBR1 PE=1 SV=3	30.375	10
185	18.05	18.17	32.15	P78371	TCPB_HUMAN	T-complex protein 1 subunit beta OS=Homo sapiens GN=CCT2 PE=1 SV=4	57.488	13
186	18	18.03	88.08	P60660	MYL6_HUMAN	Myosin light polypeptide 6 OS=Homo sapiens GN=MYL6 PE=1 SV=2	16.93	12
187	17.98	18.36	15.07	P19338	NUCL_HUMAN	Nucleolin OS=Homo sapiens GN=NCL PE=1 SV=3	76.614	10
188	17.82	17.88	33.43	Q9UJ70	NAGK_HUMAN	N-acetyl-D-glucosamine kinase OS=Homo sapiens GN=NAGK PE=1 SV=4	37.376	11
189	17.8	17.91	31.45	P13489	RINI_HUMAN	Ribonuclease inhibitor OS=Homo sapiens GN=RNH1 PE=1 SV=2	49.973	11
190	17.72	17.72	54.5	Q99497	PARK7_HUMAN	Protein DJ-1 OS=Homo sapiens GN=PARK7 PE=1 SV=2	19.891	11
191	17.65	17.68	50.39	P10606	COX5B_HUMAN	Cytochrome c oxidase subunit 5B, mitochondrial OS=Homo sapiens GN=COX5B PE=1 SV=2	13.696	10
192	17.62	17.62	34.46	Q9BWM7	SFXN3_HUMAN	Sideroflexin-3 OS=Homo sapiens GN=SFXN3 PE=2 SV=2	35.979	9
193	17.44	17.5	22.53	Q96KP4	CNDP2_HUMAN	Cytosolic non-specific dipeptidase OS=Homo sapiens GN=CNDP2 PE=1 SV=2	52.878	10
194	17.37	17.37	52.05	P19105	ML12A_HUMAN	Myosin regulatory light chain 12A OS=Homo sapiens GN=MYL12A PE=1 SV=2	19.794	11
194	0	17.37	51.74	O14950	ML12B_HUMAN	Myosin regulatory light chain 12B OS=Homo sapiens GN=MYL12B PE=1 SV=2	19.779	11
195	17.35	17.35	40.71	P33241	LSP1_HUMAN	Lymphocyte-specific protein 1 OS=Homo sapiens GN=LSP1 PE=1 SV=1	37.192	10
196	17.29	17.62	11.89	P27816	MAP4_HUMAN	Microtubule-associated protein 4 OS=Homo sapiens GN=MAP4 PE=1 SV=3	121.005	10
197	17.14	17.67	8.991	Q00341	VIGLN_HUMAN	Vigilin OS=Homo sapiens GN=HDLBP PE=1 SV=2	141.456	10
198	17.13	17.2	4.269	Q07954	LRP1_HUMAN	Prolow-density lipoprotein receptor-related protein 1 OS=Homo sapiens GN=LRP1 PE=1 SV=2	504.606	16
199	16.84	16.95	13.89	P43304	GPDM_HUMAN	Glycerol-3-phosphate dehydrogenase, mitochondrial OS=Homo sapiens GN=GPD2 PE=1 SV=3	80.853	9
200	16.83	17.03	51.61	Q9H299	SH3L3_HUMAN	SH3 domain-binding glutamic acid-rich-like protein 3 OS=Homo sapiens GN=SH3BGRL3 PE=1 SV=1	10.438	9
201	16.81	17.17	11.23	P26006	ITA3_HUMAN	Integrin alpha-3 OS=Homo sapiens GN=ITGA3 PE=1 SV=5	116.612	10
202	16.79	21.04	34.98	A6NL28	TPM3L_HUMAN	Putative tropomyosin alpha-3 chain-like protein OS=Homo sapiens PE=5 SV=2	26.269	11
203	16.77	16.81	24.73	P49748	ACADV_HUMAN	Very long-chain specific acyl-CoA dehydrogenase, mitochondrial OS=Homo sapiens GN=ACADVL PE=1 SV=1	70.39	11
204	16.74	16.84	28.74	P07195	LDHB_HUMAN	L-lactate dehydrogenase B chain OS=Homo sapiens GN=LDHB PE=1 SV=2	36.638	8
205	16.69	16.7	38.07	Q15907	RB11B_HUMAN	Ras-related protein Rab-11B OS=Homo sapiens GN=RAB11B PE=1 SV=4	24.489	10
206	16.57	16.63	20.38	Q15233	NONO_HUMAN	Non-POU domain-containing octamer-binding protein OS=Homo sapiens GN=NONO PE=1 SV=4	54.232	9
207	16.51	17.28	22.63	P50991	TCPD_HUMAN	T-complex protein 1 subunit delta OS=Homo sapiens GN=CCT4 PE=1 SV=4	57.924	9
208	16.48	16.55	21.53	P22626	ROA2_HUMAN	Heterogeneous nuclear ribonucleoproteins A2/B1 OS=Homo sapiens GN=HNRNPA2B1 PE=1 SV=2	37.43	9
209	16.46	16.5	33.25	P11310	ACADM_HUMAN	Medium-chain specific acyl-CoA dehydrogenase, mitochondrial OS=Homo sapiens GN=ACADM PE=1 SV=1	46.588	10
210	16.41	16.87	6.213	P49327	FAS_HUMAN	Fatty acid synthase OS=Homo sapiens GN=FASN PE=1 SV=3	273.427	12
211	16.39	16.51	22.11	O75083	WDR1_HUMAN	WD repeat-containing protein 1 OS=Homo sapiens GN=WDR1 PE=1 SV=4	66.194	11
212	16.37	16.42	35.91	P05141	ADT2_HUMAN	ADP/ATP translocase 2 OS=Homo sapiens GN=SLC25A5 PE=1 SV=7	32.852	12
213	16.37	16.37	27.9	Q04826	1B40_HUMAN	HLA class I histocompatibility antigen, B-40 alpha chain OS=Homo sapiens GN=HLA-B PE=1 SV=1	40.505	8
214	16.33	19.33	27.21	P48735	IDHP_HUMAN	Isocitrate dehydrogenase [NADP], mitochondrial OS=Homo sapiens GN=IDH2 PE=1 SV=2	50.909	9
215	16.32	16.46	32.69	Q15019	SEPT2_HUMAN	Septin-2 OS=Homo sapiens GN=SEPT2 PE=1 SV=1	41.487	8
216	16.28	16.4	35.61	P09110	THIK_HUMAN	3-ketoacyl-CoA thiolase, peroxisomal OS=Homo sapiens GN=ACAA1 PE=1 SV=2	44.292	8
217	16.28	16.34	89.93	P62158	CALM_HUMAN	Calmodulin OS=Homo sapiens GN=CALM1 PE=1 SV=2	16.838	10
218	16.28	16.32	37.43	Q96C23	GALM_HUMAN	Aldose 1-epimerase OS=Homo sapiens GN=GALM PE=1 SV=1	37.766	9
219	16.23	16.32	27.47	O75390	CISY_HUMAN	Citrate synthase, mitochondrial OS=Homo sapiens GN=CS PE=1 SV=2	51.712	10
220	16.22	22.46	51.37	P62258	1433E_HUMAN	14-3-3 protein epsilon OS=Homo sapiens GN=YWHAE PE=1 SV=1	29.174	11
221	16.15	16.48	34.38	P30048	PRDX3_HUMAN	Thioredoxin-dependent peroxide reductase, mitochondrial OS=Homo sapiens GN=PRDX3 PE=1 SV=3	27.693	8
222	16.11	16.45	21.35	P50990	TCPQ_HUMAN	T-complex protein 1 subunit theta OS=Homo sapiens GN=CCT8 PE=1 SV=4	59.621	11
223	16.03	16.31	20.31	P13667	PDIA4_HUMAN	Protein disulfide-isomerase A4 OS=Homo sapiens GN=PDIA4 PE=1 SV=2	72.932	11
224	16.02	16.39	27.3	Q9UHD8	SEPT9_HUMAN	Septin-9 OS=Homo sapiens GN=SEPT9 PE=1 SV=2	65.401	11
225	15.87	16.01	11.91	Q9NQC3	RTN4_HUMAN	Reticulon-4 OS=Homo sapiens GN=RTN4 PE=1 SV=2	129.931	8
226	15.78	15.92	17.21	O00160	MYO1F_HUMAN	Unconventional myosin-If OS=Homo sapiens GN=MYO1F PE=1 SV=3	124.844	14
227	15.77	15.85	28.74	Q86TX2	ACOT1_HUMAN	Acyl-coenzyme A thioesterase 1 OS=Homo sapiens GN=ACOT1 PE=1 SV=1	46.277	10
228	15.71	15.75	42.15	O15400	STX7_HUMAN	Syntaxin-7 OS=Homo sapiens GN=STX7 PE=1 SV=4	29.816	11
229	15.65	15.73	15.38	Q14956	GPNMB_HUMAN	Transmembrane glycoprotein NMB OS=Homo sapiens GN=GPNMB PE=1 SV=2	63.923	12
230	15.61	15.67	32.49	Q99541	PLIN2_HUMAN	Perilipin-2 OS=Homo sapiens GN=PLIN2 PE=1 SV=2	48.075	10
231	15.49	15.52	18.43	O43776	SYNC_HUMAN	Asparagine--tRNA ligase, cytoplasmic OS=Homo sapiens GN=NARS PE=1 SV=1	62.943	8
232	15.35	15.76	6.704	Q7L576	CYFP1_HUMAN	Cytoplasmic FMR1-interacting protein 1 OS=Homo sapiens GN=CYFIP1 PE=1 SV=1	145.182	8
233	15.35	15.4	26.48	P04899	GNAI2_HUMAN	Guanine nucleotide-binding protein G(i) subunit alpha-2 OS=Homo sapiens GN=GNAI2 PE=1 SV=3	40.451	9
234	15.35	15.38	39.71	P47756	CAPZB_HUMAN	F-actin-capping protein subunit beta OS=Homo sapiens GN=CAPZB PE=1 SV=4	31.35	10
235	15.23	15.23	80.74	P09382	LEG1_HUMAN	Galectin-1 OS=Homo sapiens GN=LGALS1 PE=1 SV=2	14.716	11
236	15.21	15.32	18.47	O14773	TPP1_HUMAN	Tripeptidyl-peptidase 1 OS=Homo sapiens GN=TPP1 PE=1 SV=2	61.248	11
237	15.18	15.21	60.53	P22392	NDKB_HUMAN	Nucleoside diphosphate kinase B OS=Homo sapiens GN=NME2 PE=1 SV=1	17.298	9
238	15.15	15.37	8.945	Q00722	PLCB2_HUMAN	1-phosphatidylinositol 4,5-bisphosphate phosphodiesterase beta-2 OS=Homo sapiens GN=PLCB2 PE=1 SV=2	134.024	11
239	14.99	15.17	52.41	P30086	PEBP1_HUMAN	Phosphatidylethanolamine-binding protein 1 OS=Homo sapiens GN=PEBP1 PE=1 SV=3	21.057	8
240	14.99	14.99	33.2	Q9Y5K8	VATD_HUMAN	V-type proton ATPase subunit D OS=Homo sapiens GN=ATP6V1D PE=1 SV=1	28.263	10
241	14.96	15.01	23.88	P10644	KAP0_HUMAN	cAMP-dependent protein kinase type I-alpha regulatory subunit OS=Homo sapiens GN=PRKAR1A PE=1 SV=1	42.982	8
242	14.84	15.17	28.17	P04843	RPN1_HUMAN	Dolichyl-diphosphooligosaccharide--protein glycosyltransferase subunit 1 OS=Homo sapiens GN=RPN1 PE=1 SV=1	68.569	14
243	14.83	15.12	7.591	Q8TDZ2	MICA1_HUMAN	Protein-methionine sulfoxide oxidase MICAL1 OS=Homo sapiens GN=MICAL1 PE=1 SV=2	117.875	8
244	14.79	17.69	8.508	Q13576	IQGA2_HUMAN	Ras GTPase-activating-like protein IQGAP2 OS=Homo sapiens GN=IQGAP2 PE=1 SV=4	180.578	10
245	14.79	14.82	34.33	Q16698	DECR_HUMAN	2,4-dienoyl-CoA reductase, mitochondrial OS=Homo sapiens GN=DECR1 PE=1 SV=1	36.068	10
246	14.78	14.85	46.43	P30049	ATPD_HUMAN	ATP synthase subunit delta, mitochondrial OS=Homo sapiens GN=ATP5D PE=1 SV=2	17.49	13
247	14.76	14.76	63.81	P31949	S10AB_HUMAN	Protein S100-A11 OS=Homo sapiens GN=S100A11 PE=1 SV=2	11.74	9
248	14.71	15.08	11.61	Q16891	IMMT_HUMAN	Mitochondrial inner membrane protein OS=Homo sapiens GN=IMMT PE=1 SV=1	83.678	8
249	14.68	14.69	21.05	P26641	EF1G_HUMAN	Elongation factor 1-gamma OS=Homo sapiens GN=EEF1G PE=1 SV=3	50.119	10
250	14.64	14.72	13.38	P55786	PSA_HUMAN	Puromycin-sensitive aminopeptidase OS=Homo sapiens GN=NPEPPS PE=1 SV=2	103.276	11
251	14.63	14.83	18.42	Q99832	TCPH_HUMAN	T-complex protein 1 subunit eta OS=Homo sapiens GN=CCT7 PE=1 SV=2	59.367	8
252	14.6	15.12	7.59	Q14203	DCTN1_HUMAN	Dynactin subunit 1 OS=Homo sapiens GN=DCTN1 PE=1 SV=3	141.695	9
253	14.57	14.8	18.48	P48643	TCPE_HUMAN	T-complex protein 1 subunit epsilon OS=Homo sapiens GN=CCT5 PE=1 SV=1	59.671	7
254	14.54	14.61	52.21	P36543	VATE1_HUMAN	V-type proton ATPase subunit E 1 OS=Homo sapiens GN=ATP6V1E1 PE=1 SV=1	26.145	12
255	14.44	14.8	15.19	P33121	ACSL1_HUMAN	Long-chain-fatty-acid--CoA ligase 1 OS=Homo sapiens GN=ACSL1 PE=1 SV=1	77.943	9
256	14.42	14.61	17.47	P31040	DHSA_HUMAN	Succinate dehydrogenase [ubiquinone] flavoprotein subunit, mitochondrial OS=Homo sapiens GN=SDHA PE=1 SV=2	72.692	9
257	14.39	14.64	37.25	Q6IBS0	TWF2_HUMAN	Twinfilin-2 OS=Homo sapiens GN=TWF2 PE=1 SV=2	39.548	11
258	14.3	14.37	24.06	P22695	QCR2_HUMAN	Cytochrome b-c1 complex subunit 2, mitochondrial OS=Homo sapiens GN=UQCRC2 PE=1 SV=3	48.443	8
259	14.3	14.36	30.29	P78417	GSTO1_HUMAN	Glutathione S-transferase omega-1 OS=Homo sapiens GN=GSTO1 PE=1 SV=2	27.566	8
260	14.28	14.59	18.8	Q16881	TRXR1_HUMAN	Thioredoxin reductase 1, cytoplasmic OS=Homo sapiens GN=TXNRD1 PE=1 SV=3	70.906	7
261	14.26	14.36	37.24	P54819	KAD2_HUMAN	Adenylate kinase 2, mitochondrial OS=Homo sapiens GN=AK2 PE=1 SV=2	26.478	8
262	14.25	14.44	16.03	P08195	4F2_HUMAN	4F2 cell-surface antigen heavy chain OS=Homo sapiens GN=SLC3A2 PE=1 SV=3	67.994	8
263	14.22	14.47	19.75	Q9UNF0	PACN2_HUMAN	Protein kinase C and casein kinase substrate in neurons protein 2 OS=Homo sapiens GN=PACSIN2 PE=1 SV=2	55.739	8
264	14.21	14.36	31.48	Q9NUQ9	FA49B_HUMAN	Protein FAM49B OS=Homo sapiens GN=FAM49B PE=1 SV=1	36.748	7
265	14.2	14.22	12.36	P19878	NCF2_HUMAN	Neutrophil cytosol factor 2 OS=Homo sapiens GN=NCF2 PE=1 SV=2	59.762	7
266	14.14	15.11	7.606	Q92974	ARHG2_HUMAN	Rho guanine nucleotide exchange factor 2 OS=Homo sapiens GN=ARHGEF2 PE=1 SV=4	111.543	6
267	14.11	14.17	16.51	P28331	NDUS1_HUMAN	NADH-ubiquinone oxidoreductase 75 kDa subunit, mitochondrial OS=Homo sapiens GN=NDUFS1 PE=1 SV=3	79.468	10
268	14.04	14.06	10.51	P16070	CD44_HUMAN	CD44 antigen OS=Homo sapiens GN=CD44 PE=1 SV=3	81.538	7
269	13.88	13.89	21.7	P12955	PEPD_HUMAN	Xaa-Pro dipeptidase OS=Homo sapiens GN=PEPD PE=1 SV=3	54.548	9
270	13.85	14.01	16.31	O95831	AIFM1_HUMAN	Apoptosis-inducing factor 1, mitochondrial OS=Homo sapiens GN=AIFM1 PE=1 SV=1	66.901	9
271	13.81	13.91	19.43	P49189	AL9A1_HUMAN	4-trimethylaminobutyraldehyde dehydrogenase OS=Homo sapiens GN=ALDH9A1 PE=1 SV=3	53.802	9
272	13.77	13.85	50.97	P30043	BLVRB_HUMAN	Flavin reductase (NADPH) OS=Homo sapiens GN=BLVRB PE=1 SV=3	22.119	7
273	13.74	13.84	36.1	P20618	PSB1_HUMAN	Proteasome subunit beta type-1 OS=Homo sapiens GN=PSMB1 PE=1 SV=2	26.489	7
274	13.72	13.85	31.24	P09622	DLDH_HUMAN	Dihydrolipoyl dehydrogenase, mitochondrial OS=Homo sapiens GN=DLD PE=1 SV=2	54.177	11
275	13.71	13.72	51.87	P30044	PRDX5_HUMAN	Peroxiredoxin-5, mitochondrial OS=Homo sapiens GN=PRDX5 PE=1 SV=4	22.086	13
276	13.7	13.85	38.87	P21796	VDAC1_HUMAN	Voltage-dependent anion-selective channel protein 1 OS=Homo sapiens GN=VDAC1 PE=1 SV=2	30.773	9
277	13.68	13.71	58.93	P30041	PRDX6_HUMAN	Peroxiredoxin-6 OS=Homo sapiens GN=PRDX6 PE=1 SV=3	25.035	13
278	13.62	13.99	9.875	O60763	USO1_HUMAN	General vesicular transport factor p115 OS=Homo sapiens GN=USO1 PE=1 SV=2	107.895	9
279	13.58	13.86	16.41	P33176	KINH_HUMAN	Kinesin-1 heavy chain OS=Homo sapiens GN=KIF5B PE=1 SV=1	109.685	13
280	13.42	15.8	23.86	Q02818	NUCB1_HUMAN	Nucleobindin-1 OS=Homo sapiens GN=NUCB1 PE=1 SV=4	53.879	10
281	13.39	13.56	42.91	P30040	ERP29_HUMAN	Endoplasmic reticulum resident protein 29 OS=Homo sapiens GN=ERP29 PE=1 SV=4	28.993	10
282	13.37	13.57	17.58	P30038	AL4A1_HUMAN	Delta-1-pyrroline-5-carboxylate dehydrogenase, mitochondrial OS=Homo sapiens GN=ALDH4A1 PE=1 SV=3	61.719	8
283	13.3	13.3	23.39	P54920	SNAA_HUMAN	Alpha-soluble NSF attachment protein OS=Homo sapiens GN=NAPA PE=1 SV=3	33.233	7
284	13.28	28.31	43.78	P09104	ENOG_HUMAN	Gamma-enolase OS=Homo sapiens GN=ENO2 PE=1 SV=3	47.269	9
285	13.28	13.44	23.91	P04040	CATA_HUMAN	Catalase OS=Homo sapiens GN=CAT PE=1 SV=3	59.756	8
286	13.27	13.45	11.89	P08575	PTPRC_HUMAN	Receptor-type tyrosine-protein phosphatase C OS=Homo sapiens GN=PTPRC PE=1 SV=2	147.254	12
287	13.27	13.3	20.37	P30153	2AAA_HUMAN	Serine/threonine-protein phosphatase 2A 65 kDa regulatory subunit A alpha isoform OS=Homo sapiens GN=PPP2R1A PE=1 SV=4	65.309	10
288	13.13	13.9	39.81	P26373	RL13_HUMAN	60S ribosomal protein L13 OS=Homo sapiens GN=RPL13 PE=1 SV=4	24.261	10
289	13.1	13.17	14	Q14247	SRC8_HUMAN	Src substrate cortactin OS=Homo sapiens GN=CTTN PE=1 SV=2	61.586	8
290	13.1	13.16	51.21	P51149	RAB7A_HUMAN	Ras-related protein Rab-7a OS=Homo sapiens GN=RAB7A PE=1 SV=1	23.49	9
291	13.09	13.25	49.05	P25786	PSA1_HUMAN	Proteasome subunit alpha type-1 OS=Homo sapiens GN=PSMA1 PE=1 SV=1	29.556	10
292	13.01	13.2	23.65	P60842	IF4A1_HUMAN	Eukaryotic initiation factor 4A-I OS=Homo sapiens GN=EIF4A1 PE=1 SV=1	46.154	7
293	12.97	13.16	22.18	Q9H223	EHD4_HUMAN	EH domain-containing protein 4 OS=Homo sapiens GN=EHD4 PE=1 SV=1	61.175	10
294	12.84	12.91	35.71	P09211	GSTP1_HUMAN	Glutathione S-transferase P OS=Homo sapiens GN=GSTP1 PE=1 SV=2	23.356	7
295	12.83	12.84	25.38	P25774	CATS_HUMAN	Cathepsin S OS=Homo sapiens GN=CTSS PE=1 SV=3	37.496	12
296	12.81	12.84	40	P14174	MIF_HUMAN	Macrophage migration inhibitory factor OS=Homo sapiens GN=MIF PE=1 SV=4	12.476	8
297	12.79	13.24	9.425	P50570	DYN2_HUMAN	Dynamin-2 OS=Homo sapiens GN=DNM2 PE=1 SV=2	98.064	8
298	12.76	13.37	19.17	P35998	PRS7_HUMAN	26S protease regulatory subunit 7 OS=Homo sapiens GN=PSMC2 PE=1 SV=3	48.634	7
299	12.76	12.76	33.79	P10412	H14_HUMAN	Histone H1.4 OS=Homo sapiens GN=HIST1H1E PE=1 SV=2	21.865	8
300	12.71	13.08	37.4	O95571	ETHE1_HUMAN	Protein ETHE1, mitochondrial OS=Homo sapiens GN=ETHE1 PE=1 SV=2	27.873	7
301	12.67	12.71	52.7	O00299	CLIC1_HUMAN	Chloride intracellular channel protein 1 OS=Homo sapiens GN=CLIC1 PE=1 SV=4	26.923	10
302	12.64	12.75	19.01	Q9Y3I0	RTCB_HUMAN	tRNA-splicing ligase RtcB homolog OS=Homo sapiens GN=C22orf28 PE=1 SV=1	55.21	8
303	12.62	12.62	43.24	Q04837	SSBP_HUMAN	Single-stranded DNA-binding protein, mitochondrial OS=Homo sapiens GN=SSBP1 PE=1 SV=1	17.26	6
304	12.6	12.77	14.05	P49588	SYAC_HUMAN	Alanine--tRNA ligase, cytoplasmic OS=Homo sapiens GN=AARS PE=1 SV=2	106.81	10
305	12.58	12.81	21.08	P05091	ALDH2_HUMAN	Aldehyde dehydrogenase, mitochondrial OS=Homo sapiens GN=ALDH2 PE=1 SV=2	56.381	10
306	12.56	12.69	19.44	P23526	SAHH_HUMAN	Adenosylhomocysteinase OS=Homo sapiens GN=AHCY PE=1 SV=4	47.716	8
307	12.55	12.56	76.53	P04080	CYTB_HUMAN	Cystatin-B OS=Homo sapiens GN=CSTB PE=1 SV=2	11.14	8
308	12.54	47.52	48.59	P06753	TPM3_HUMAN	Tropomyosin alpha-3 chain OS=Homo sapiens GN=TPM3 PE=1 SV=1	32.95	7
309	12.52	12.81	40.76	P61224	RAP1B_HUMAN	Ras-related protein Rap-1b OS=Homo sapiens GN=RAP1B PE=1 SV=1	20.825	8
310	12.51	12.58	35.1	P62263	RS14_HUMAN	40S ribosomal protein S14 OS=Homo sapiens GN=RPS14 PE=1 SV=3	16.273	7
311	12.5	12.56	18.71	P31943	HNRH1_HUMAN	Heterogeneous nuclear ribonucleoprotein H OS=Homo sapiens GN=HNRNPH1 PE=1 SV=4	49.229	6
312	12.47	16.85	14.95	Q92841	DDX17_HUMAN	Probable ATP-dependent RNA helicase DDX17 OS=Homo sapiens GN=DDX17 PE=1 SV=2	80.272	9
313	12.47	12.62	17.99	P17987	TCPA_HUMAN	T-complex protein 1 subunit alpha OS=Homo sapiens GN=TCP1 PE=1 SV=1	60.344	8
314	12.44	12.54	9.954	Q9Y678	COPG1_HUMAN	Coatomer subunit gamma-1 OS=Homo sapiens GN=COPG1 PE=1 SV=1	97.718	7
315	12.43	12.74	8.538	Q14152	EIF3A_HUMAN	Eukaryotic translation initiation factor 3 subunit A OS=Homo sapiens GN=EIF3A PE=1 SV=1	166.569	10
316	12.41	16.3	43	P30405	PPIF_HUMAN	Peptidyl-prolyl cis-trans isomerase F, mitochondrial OS=Homo sapiens GN=PPIF PE=1 SV=1	22.04	6
317	12.36	12.36	23.73	Q16658	FSCN1_HUMAN	Fascin OS=Homo sapiens GN=FSCN1 PE=1 SV=3	54.53	10
318	12.32	12.48	14.15	Q8NBJ5	GT251_HUMAN	Procollagen galactosyltransferase 1 OS=Homo sapiens GN=GLT25D1 PE=1 SV=1	71.636	8
319	12.26	12.26	66.28	P14854	CX6B1_HUMAN	Cytochrome c oxidase subunit 6B1 OS=Homo sapiens GN=COX6B1 PE=1 SV=2	10.192	6
320	12.21	12.34	45.54	P26447	S10A4_HUMAN	Protein S100-A4 OS=Homo sapiens GN=S100A4 PE=1 SV=1	11.729	8
321	12.19	12.28	12.94	P39656	OST48_HUMAN	Dolichyl-diphosphooligosaccharide--protein glycosyltransferase 48 kDa subunit OS=Homo sapiens GN=DDOST PE=1 SV=4	50.801	6
322	12.18	14.34	30.17	P08865	RSSA_HUMAN	40S ribosomal protein SA OS=Homo sapiens GN=RPSA PE=1 SV=4	32.854	6
323	12.17	12.22	43.37	P63220	RS21_HUMAN	40S ribosomal protein S21 OS=Homo sapiens GN=RPS21 PE=1 SV=1	9.111	7
324	12.16	12.49	11.58	P02786	TFR1_HUMAN	Transferrin receptor protein 1 OS=Homo sapiens GN=TFRC PE=1 SV=2	84.871	7
325	12.15	12.26	31.91	P35237	SPB6_HUMAN	Serpin B6 OS=Homo sapiens GN=SERPINB6 PE=1 SV=3	42.622	9
326	12.13	14.95	5.452	P42704	LPPRC_HUMAN	Leucine-rich PPR motif-containing protein, mitochondrial OS=Homo sapiens GN=LRPPRC PE=1 SV=3	157.905	6
327	12.12	12.4	15.54	Q9H4A4	AMPB_HUMAN	Aminopeptidase B OS=Homo sapiens GN=RNPEP PE=1 SV=2	72.596	8
328	12.11	12.18	16.49	Q96TA1	NIBL1_HUMAN	Niban-like protein 1 OS=Homo sapiens GN=FAM129B PE=1 SV=3	84.138	8
329	12.1	12.11	34.42	O75396	SC22B_HUMAN	Vesicle-trafficking protein SEC22b OS=Homo sapiens GN=SEC22B PE=1 SV=4	24.593	7
330	12.02	12.64	34.7	P62333	PRS10_HUMAN	26S protease regulatory subunit 10B OS=Homo sapiens GN=PSMC6 PE=1 SV=1	44.173	9
331	12	16.58	15.28	P23246	SFPQ_HUMAN	Splicing factor, proline- and glutamine-rich OS=Homo sapiens GN=SFPQ PE=1 SV=2	76.149	8
332	11.99	12.13	13.7	O43175	SERA_HUMAN	D-3-phosphoglycerate dehydrogenase OS=Homo sapiens GN=PHGDH PE=1 SV=4	56.651	7
333	11.98	12.02	16.8	P20073	ANXA7_HUMAN	Annexin A7 OS=Homo sapiens GN=ANXA7 PE=1 SV=3	52.739	9
334	11.97	11.99	22.22	P50502	F10A1_HUMAN	Hsc70-interacting protein OS=Homo sapiens GN=ST13 PE=1 SV=2	41.332	9
335	11.91	12.12	12.01	Q8N1G4	LRC47_HUMAN	Leucine-rich repeat-containing protein 47 OS=Homo sapiens GN=LRRC47 PE=1 SV=1	63.473	6
336	11.9	12.06	53.4	O43399	TPD54_HUMAN	Tumor protein D54 OS=Homo sapiens GN=TPD52L2 PE=1 SV=2	22.238	9
337	11.83	12.21	12.63	P46459	NSF_HUMAN	Vesicle-fusing ATPase OS=Homo sapiens GN=NSF PE=1 SV=3	82.594	8
338	11.82	12.24	6.278	Q13464	ROCK1_HUMAN	Rho-associated protein kinase 1 OS=Homo sapiens GN=ROCK1 PE=1 SV=1	158.175	7
339	11.79	11.79	12.96	Q04446	GLGB_HUMAN	1,4-alpha-glucan-branching enzyme OS=Homo sapiens GN=GBE1 PE=1 SV=3	80.474	7
340	11.78	12.11	18.93	Q13838	DX39B_HUMAN	Spliceosome RNA helicase DDX39B OS=Homo sapiens GN=DDX39B PE=1 SV=1	48.991	7
341	11.71	11.97	19.92	Q3KQV9	UAP1L_HUMAN	UDP-N-acetylhexosamine pyrophosphorylase-like protein 1 OS=Homo sapiens GN=UAP1L1 PE=2 SV=2	57.03	9
342	11.69	11.71	16.85	P15586	GNS_HUMAN	N-acetylglucosamine-6-sulfatase OS=Homo sapiens GN=GNS PE=1 SV=3	62.082	8
343	11.68	11.82	25.56	P39023	RL3_HUMAN	60S ribosomal protein L3 OS=Homo sapiens GN=RPL3 PE=1 SV=2	46.109	10
344	11.63	12.09	23.29	O60826	CCD22_HUMAN	Coiled-coil domain-containing protein 22 OS=Homo sapiens GN=CCDC22 PE=1 SV=1	70.756	12
345	11.6	37.09	28.65	O43707	ACTN4_HUMAN	Alpha-actinin-4 OS=Homo sapiens GN=ACTN4 PE=1 SV=2	104.854	7
346	11.59	11.77	12.63	P04839	CY24B_HUMAN	Cytochrome b-245 heavy chain OS=Homo sapiens GN=CYBB PE=1 SV=2	65.336	6
347	11.55	11.66	35.61	P61247	RS3A_HUMAN	40S ribosomal protein S3a OS=Homo sapiens GN=RPS3A PE=1 SV=2	29.945	8
348	11.51	11.87	5.259	Q13813	SPTA2_HUMAN	Spectrin alpha chain, brain OS=Homo sapiens GN=SPTAN1 PE=1 SV=3	284.539	10
349	11.51	11.56	50.91	P30050	RL12_HUMAN	60S ribosomal protein L12 OS=Homo sapiens GN=RPL12 PE=1 SV=1	17.819	7
350	11.5	11.57	30.49	O60784	TOM1_HUMAN	Target of Myb protein 1 OS=Homo sapiens GN=TOM1 PE=1 SV=2	53.818	8
351	11.46	11.56	35.15	Q9UL46	PSME2_HUMAN	Proteasome activator complex subunit 2 OS=Homo sapiens GN=PSME2 PE=1 SV=4	27.402	8
352	11.4	11.8	12.08	P53396	ACLY_HUMAN	ATP-citrate synthase OS=Homo sapiens GN=ACLY PE=1 SV=3	120.839	10
353	11.37	11.39	34.55	P60900	PSA6_HUMAN	Proteasome subunit alpha type-6 OS=Homo sapiens GN=PSMA6 PE=1 SV=1	27.399	7
354	11.3	11.3	13.53	Q9UBR2	CATZ_HUMAN	Cathepsin Z OS=Homo sapiens GN=CTSZ PE=1 SV=1	33.868	6
355	11.26	11.26	27.27	P47755	CAZA2_HUMAN	F-actin-capping protein subunit alpha-2 OS=Homo sapiens GN=CAPZA2 PE=1 SV=3	32.949	6
356	11.23	11.39	32.02	O15145	ARPC3_HUMAN	Actin-related protein 2/3 complex subunit 3 OS=Homo sapiens GN=ARPC3 PE=1 SV=3	20.547	7
357	11.23	11.26	50.93	P51148	RAB5C_HUMAN	Ras-related protein Rab-5C OS=Homo sapiens GN=RAB5C PE=1 SV=2	23.483	8
358	11.18	11.47	29.86	P01892	1A02_HUMAN	HLA class I histocompatibility antigen, A-2 alpha chain OS=Homo sapiens GN=HLA-A PE=1 SV=1	40.922	8
359	11.17	11.41	19.19	Q9UMX0	UBQL1_HUMAN	Ubiquilin-1 OS=Homo sapiens GN=UBQLN1 PE=1 SV=2	62.519	6
360	11.07	11.2	23.38	Q9BTU6	P4K2A_HUMAN	Phosphatidylinositol 4-kinase type 2-alpha OS=Homo sapiens GN=PI4K2A PE=1 SV=1	54.022	7
361	11.07	11.18	20	P62879	GBB2_HUMAN	Guanine nucleotide-binding protein G(I)/G(S)/G(T) subunit beta-2 OS=Homo sapiens GN=GNB2 PE=1 SV=3	37.331	8
362	11.05	11.23	26.98	P13861	KAP2_HUMAN	cAMP-dependent protein kinase type II-alpha regulatory subunit OS=Homo sapiens GN=PRKAR2A PE=1 SV=2	45.518	8
363	11.03	11.03	13.35	P22307	NLTP_HUMAN	Non-specific lipid-transfer protein OS=Homo sapiens GN=SCP2 PE=1 SV=2	58.994	6
364	11	11.03	20.82	Q16181	SEPT7_HUMAN	Septin-7 OS=Homo sapiens GN=SEPT7 PE=1 SV=2	50.68	7
365	10.99	10.99	25.31	P67809	YBOX1_HUMAN	Nuclease-sensitive element-binding protein 1 OS=Homo sapiens GN=YBX1 PE=1 SV=3	35.924	5
366	10.98	10.98	89.47	O75368	SH3L1_HUMAN	SH3 domain-binding glutamic acid-rich-like protein OS=Homo sapiens GN=SH3BGRL PE=1 SV=1	12.774	7
367	10.95	11.04	24.86	P50213	IDH3A_HUMAN	Isocitrate dehydrogenase [NAD] subunit alpha, mitochondrial OS=Homo sapiens GN=IDH3A PE=1 SV=1	39.592	7
368	10.93	10.96	23.39	P09496	CLCA_HUMAN	Clathrin light chain A OS=Homo sapiens GN=CLTA PE=1 SV=1	27.077	6
369	10.93	10.93	50.68	P62249	RS16_HUMAN	40S ribosomal protein S16 OS=Homo sapiens GN=RPS16 PE=1 SV=2	16.445	8
370	10.91	10.91	72.46	P62857	RS28_HUMAN	40S ribosomal protein S28 OS=Homo sapiens GN=RPS28 PE=1 SV=1	7.841	9
371	10.88	10.95	25.13	P08559	ODPA_HUMAN	Pyruvate dehydrogenase E1 component subunit alpha, somatic form, mitochondrial OS=Homo sapiens GN=PDHA1 PE=1 SV=3	43.296	9
372	10.86	11	25.83	P62277	RS13_HUMAN	40S ribosomal protein S13 OS=Homo sapiens GN=RPS13 PE=1 SV=2	17.222	5
373	10.83	15.76	35.24	P00338	LDHA_HUMAN	L-lactate dehydrogenase A chain OS=Homo sapiens GN=LDHA PE=1 SV=2	36.689	10
374	10.79	14.93	24.52	Q13596	SNX1_HUMAN	Sorting nexin-1 OS=Homo sapiens GN=SNX1 PE=1 SV=3	59.07	9
375	10.79	10.79	76.52	P05387	RLA2_HUMAN	60S acidic ribosomal protein P2 OS=Homo sapiens GN=RPLP2 PE=1 SV=1	11.665	7
376	10.78	10.96	15.32	Q96QH2	PRAM_HUMAN	PML-RARA-regulated adapter molecule 1 OS=Homo sapiens GN=PRAM1 PE=1 SV=2	79.245	8
377	10.74	11.1	10.73	P40227	TCPZ_HUMAN	T-complex protein 1 subunit zeta OS=Homo sapiens GN=CCT6A PE=1 SV=3	58.024	6
378	10.74	10.84	15.73	P42224	STAT1_HUMAN	Signal transducer and activator of transcription 1-alpha/beta OS=Homo sapiens GN=STAT1 PE=1 SV=2	87.335	8
379	10.71	10.72	19.73	P06748	NPM_HUMAN	Nucleophosmin OS=Homo sapiens GN=NPM1 PE=1 SV=2	32.575	7
380	10.69	19.29	41.22	P27348	1433T_HUMAN	14-3-3 protein theta OS=Homo sapiens GN=YWHAQ PE=1 SV=1	27.764	6
381	10.65	10.69	12.87	Q16204	CCDC6_HUMAN	Coiled-coil domain-containing protein 6 OS=Homo sapiens GN=CCDC6 PE=1 SV=2	53.291	7
382	10.62	10.92	10.27	Q9Y3L3	3BP1_HUMAN	SH3 domain-binding protein 1 OS=Homo sapiens GN=SH3BP1 PE=1 SV=3	75.713	6
383	10.54	10.67	27.57	P27635	RL10_HUMAN	60S ribosomal protein L10 OS=Homo sapiens GN=RPL10 PE=1 SV=4	24.604	6
384	10.54	10.6	14.87	Q96G03	PGM2_HUMAN	Phosphoglucomutase-2 OS=Homo sapiens GN=PGM2 PE=1 SV=4	68.283	7
385	10.53	10.91	12.5	Q96I99	SUCB2_HUMAN	Succinyl-CoA ligase [GDP-forming] subunit beta, mitochondrial OS=Homo sapiens GN=SUCLG2 PE=1 SV=2	46.511	5
386	10.52	10.52	71.26	P07108	ACBP_HUMAN	Acyl-CoA-binding protein OS=Homo sapiens GN=DBI PE=1 SV=2	10.044	6
387	10.51	10.58	14.44	P48506	GSH1_HUMAN	Glutamate--cysteine ligase catalytic subunit OS=Homo sapiens GN=GCLC PE=1 SV=2	72.766	7
388	10.51	10.58	28.26	P10109	ADX_HUMAN	Adrenodoxin, mitochondrial OS=Homo sapiens GN=FDX1 PE=1 SV=1	19.393	5
389	10.47	10.83	5.98	O60271	JIP4_HUMAN	C-Jun-amino-terminal kinase-interacting protein 4 OS=Homo sapiens GN=SPAG9 PE=1 SV=4	146.205	6
390	10.46	10.64	20.32	P30740	ILEU_HUMAN	Leukocyte elastase inhibitor OS=Homo sapiens GN=SERPINB1 PE=1 SV=1	42.742	6
391	10.44	10.52	43.54	Q13404	UB2V1_HUMAN	Ubiquitin-conjugating enzyme E2 variant 1 OS=Homo sapiens GN=UBE2V1 PE=1 SV=2	16.495	7
392	10.42	10.49	28.4	O60493	SNX3_HUMAN	Sorting nexin-3 OS=Homo sapiens GN=SNX3 PE=1 SV=3	18.762	6
393	10.41	10.54	18.47	Q9BS26	ERP44_HUMAN	Endoplasmic reticulum resident protein 44 OS=Homo sapiens GN=ERP44 PE=1 SV=1	46.971	7
394	10.39	11.28	26.11	P36222	CH3L1_HUMAN	Chitinase-3-like protein 1 OS=Homo sapiens GN=CHI3L1 PE=1 SV=2	42.625	7
395	10.38	10.61	11.61	O43242	PSMD3_HUMAN	26S proteasome non-ATPase regulatory subunit 3 OS=Homo sapiens GN=PSMD3 PE=1 SV=2	60.978	5
396	10.37	10.41	27.08	P15153	RAC2_HUMAN	Ras-related C3 botulinum toxin substrate 2 OS=Homo sapiens GN=RAC2 PE=1 SV=1	21.429	5
397	10.36	10.43	18.73	P31153	METK2_HUMAN	S-adenosylmethionine synthase isoform type-2 OS=Homo sapiens GN=MAT2A PE=1 SV=1	43.661	6
398	10.35	10.56	23.06	Q6NUK1	SCMC1_HUMAN	Calcium-binding mitochondrial carrier protein SCaMC-1 OS=Homo sapiens GN=SLC25A24 PE=1 SV=2	53.354	7
399	10.35	10.41	25.69	P07954	FUMH_HUMAN	Fumarate hydratase, mitochondrial OS=Homo sapiens GN=FH PE=1 SV=3	54.637	9
400	10.33	10.45	22.42	Q15080	NCF4_HUMAN	Neutrophil cytosol factor 4 OS=Homo sapiens GN=NCF4 PE=1 SV=2	39.032	6
401	10.31	10.78	10.38	P53621	COPA_HUMAN	Coatomer subunit alpha OS=Homo sapiens GN=COPA PE=1 SV=2	138.346	10
402	10.24	10.32	39.33	P20674	COX5A_HUMAN	Cytochrome c oxidase subunit 5A, mitochondrial OS=Homo sapiens GN=COX5A PE=1 SV=2	16.762	6
403	10.23	10.31	33.71	P28070	PSB4_HUMAN	Proteasome subunit beta type-4 OS=Homo sapiens GN=PSMB4 PE=1 SV=4	29.204	7
404	10.2	10.26	18.43	P62906	RL10A_HUMAN	60S ribosomal protein L10a OS=Homo sapiens GN=RPL10A PE=1 SV=2	24.831	5
405	10.19	10.26	12.85	Q00839	HNRPU_HUMAN	Heterogeneous nuclear ribonucleoprotein U OS=Homo sapiens GN=HNRNPU PE=1 SV=6	90.584	6
406	10.18	10.44	8.645	P47897	SYQ_HUMAN	Glutamine--tRNA ligase OS=Homo sapiens GN=QARS PE=1 SV=1	87.799	6
407	10.17	10.21	32.53	Q06323	PSME1_HUMAN	Proteasome activator complex subunit 1 OS=Homo sapiens GN=PSME1 PE=1 SV=1	28.723	7
408	10.15	10.27	19.47	Q13418	ILK_HUMAN	Integrin-linked protein kinase OS=Homo sapiens GN=ILK PE=1 SV=2	51.419	8
409	10.14	10.24	40.33	P23396	RS3_HUMAN	40S ribosomal protein S3 OS=Homo sapiens GN=RPS3 PE=1 SV=2	26.688	8
410	10.14	10.2	18.02	Q9UQ80	PA2G4_HUMAN	Proliferation-associated protein 2G4 OS=Homo sapiens GN=PA2G4 PE=1 SV=3	43.787	6
411	10.13	10.18	35.38	P62244	RS15A_HUMAN	40S ribosomal protein S15a OS=Homo sapiens GN=RPS15A PE=1 SV=2	14.84	5
412	10.13	10.13	30.65	Q07955	SRSF1_HUMAN	Serine/arginine-rich splicing factor 1 OS=Homo sapiens GN=SRSF1 PE=1 SV=2	27.745	6
413	10.13	10.13	26.27	O75348	VATG1_HUMAN	V-type proton ATPase subunit G 1 OS=Homo sapiens GN=ATP6V1G1 PE=1 SV=3	13.758	5
414	10.11	45.7	73.42	P07437	TBB5_HUMAN	Tubulin beta chain OS=Homo sapiens GN=TUBB PE=1 SV=2	49.671	7
415	10.09	10.25	44.44	P07741	APT_HUMAN	Adenine phosphoribosyltransferase OS=Homo sapiens GN=APRT PE=1 SV=2	19.608	6
416	10.07	11.29	37.5	P59998	ARPC4_HUMAN	Actin-related protein 2/3 complex subunit 4 OS=Homo sapiens GN=ARPC4 PE=1 SV=3	19.667	5
417	10.05	10.2	10.93	P16435	NCPR_HUMAN	NADPH--cytochrome P450 reductase OS=Homo sapiens GN=POR PE=1 SV=2	76.69	6
418	10.05	10.06	39.68	Q9NRV9	HEBP1_HUMAN	Heme-binding protein 1 OS=Homo sapiens GN=HEBP1 PE=1 SV=1	21.097	5
419	10.03	10.12	40.79	P62269	RS18_HUMAN	40S ribosomal protein S18 OS=Homo sapiens GN=RPS18 PE=1 SV=3	17.719	7
420	10.01	10.03	18.01	Q9UI12	VATH_HUMAN	V-type proton ATPase subunit H OS=Homo sapiens GN=ATP6V1H PE=1 SV=1	55.883	6
421	10	26.41	51.22	P31946	1433B_HUMAN	14-3-3 protein beta/alpha OS=Homo sapiens GN=YWHAB PE=1 SV=3	28.082	5
422	10	10.04	37.61	P25787	PSA2_HUMAN	Proteasome subunit alpha type-2 OS=Homo sapiens GN=PSMA2 PE=1 SV=2	25.899	6
423	9.99	10.09	13.22	P36551	HEM6_HUMAN	Coproporphyrinogen-III oxidase, mitochondrial OS=Homo sapiens GN=CPOX PE=1 SV=3	50.152	5
424	9.94	9.95	25.67	O15144	ARPC2_HUMAN	Actin-related protein 2/3 complex subunit 2 OS=Homo sapiens GN=ARPC2 PE=1 SV=1	34.333	8
425	9.92	10.22	24.37	P17980	PRS6A_HUMAN	26S protease regulatory subunit 6A OS=Homo sapiens GN=PSMC3 PE=1 SV=3	49.204	9
426	9.88	10.37	18.24	P23786	CPT2_HUMAN	Carnitine O-palmitoyltransferase 2, mitochondrial OS=Homo sapiens GN=CPT2 PE=1 SV=2	73.777	10
427	9.83	9.83	42.24	O75947	ATP5H_HUMAN	ATP synthase subunit d, mitochondrial OS=Homo sapiens GN=ATP5H PE=1 SV=3	18.491	7
428	9.8	10.41	9.586	Q96P48	ARAP1_HUMAN	Arf-GAP with Rho-GAP domain, ANK repeat and PH domain-containing protein 1 OS=Homo sapiens GN=ARAP1 PE=1 SV=3	162.192	10
429	9.76	9.84	27.03	P13804	ETFA_HUMAN	Electron transfer flavoprotein subunit alpha, mitochondrial OS=Homo sapiens GN=ETFA PE=1 SV=1	35.08	6
430	9.73	9.98	14.77	P54577	SYYC_HUMAN	Tyrosine--tRNA ligase, cytoplasmic OS=Homo sapiens GN=YARS PE=1 SV=4	59.143	7
431	9.68	9.84	28.72	Q07020	RL18_HUMAN	60S ribosomal protein L18 OS=Homo sapiens GN=RPL18 PE=1 SV=2	21.634	5
432	9.64	9.9	11.18	Q96QK1	VPS35_HUMAN	Vacuolar protein sorting-associated protein 35 OS=Homo sapiens GN=VPS35 PE=1 SV=2	91.707	9
433	9.57	9.68	25	Q15435	PP1R7_HUMAN	Protein phosphatase 1 regulatory subunit 7 OS=Homo sapiens GN=PPP1R7 PE=1 SV=1	41.564	8
434	9.51	9.93	23.4	P83111	LACTB_HUMAN	Serine beta-lactamase-like protein LACTB, mitochondrial OS=Homo sapiens GN=LACTB PE=1 SV=2	60.694	9
435	9.39	9.47	11.57	P57737	CORO7_HUMAN	Coronin-7 OS=Homo sapiens GN=CORO7 PE=1 SV=2	100.605	9
436	9.33	9.5	14.57	P14868	SYDC_HUMAN	Aspartate--tRNA ligase, cytoplasmic OS=Homo sapiens GN=DARS PE=1 SV=2	57.136	6
437	9.32	9.45	27.42	P18124	RL7_HUMAN	60S ribosomal protein L7 OS=Homo sapiens GN=RPL7 PE=1 SV=1	29.226	7
438	9.31	9.5	20.3	P62424	RL7A_HUMAN	60S ribosomal protein L7a OS=Homo sapiens GN=RPL7A PE=1 SV=2	29.996	6
439	9.23	9.41	14.72	P28482	MK01_HUMAN	Mitogen-activated protein kinase 1 OS=Homo sapiens GN=MAPK1 PE=1 SV=3	41.39	5
440	9.21	9.21	9.966	P27824	CALX_HUMAN	Calnexin OS=Homo sapiens GN=CANX PE=1 SV=2	67.568	6
441	9.19	9.24	30.37	Q92882	OSTF1_HUMAN	Osteoclast-stimulating factor 1 OS=Homo sapiens GN=OSTF1 PE=1 SV=2	23.787	6
442	9.16	9.21	51.28	P55957	BID_HUMAN	BH3-interacting domain death agonist OS=Homo sapiens GN=BID PE=1 SV=1	21.995	7
443	9.14	9.24	15.93	Q6PIU2	NCEH1_HUMAN	Neutral cholesterol ester hydrolase 1 OS=Homo sapiens GN=NCEH1 PE=1 SV=3	45.808	5
444	9.14	9.15	8.897	P05556	ITB1_HUMAN	Integrin beta-1 OS=Homo sapiens GN=ITGB1 PE=1 SV=2	88.415	7
445	9.11	9.19	20.1	P62081	RS7_HUMAN	40S ribosomal protein S7 OS=Homo sapiens GN=RPS7 PE=1 SV=1	22.127	5
446	9.1	9.1	33.48	P22061	PIMT_HUMAN	Protein-L-isoaspartate(D-aspartate) O-methyltransferase OS=Homo sapiens GN=PCMT1 PE=1 SV=4	24.636	7
447	9.07	9.11	10.04	Q9Y6W5	WASF2_HUMAN	Wiskott-Aldrich syndrome protein family member 2 OS=Homo sapiens GN=WASF2 PE=1 SV=3	54.284	4
448	9.02	9.26	25.98	P52565	GDIR1_HUMAN	Rho GDP-dissociation inhibitor 1 OS=Homo sapiens GN=ARHGDIA PE=1 SV=3	23.207	4
449	8.99	9.16	19.22	P25788	PSA3_HUMAN	Proteasome subunit alpha type-3 OS=Homo sapiens GN=PSMA3 PE=1 SV=2	28.433	5
450	8.95	17.84	20.17	P52789	HXK2_HUMAN	Hexokinase-2 OS=Homo sapiens GN=HK2 PE=1 SV=2	102.38	12
451	8.93	8.94	20.05	Q9Y5X3	SNX5_HUMAN	Sorting nexin-5 OS=Homo sapiens GN=SNX5 PE=1 SV=1	46.816	8
452	8.91	11.14	22.02	Q14344	GNA13_HUMAN	Guanine nucleotide-binding protein subunit alpha-13 OS=Homo sapiens GN=GNA13 PE=1 SV=2	44.05	6
453	8.88	13.11	37.16	Q29963	1C06_HUMAN	HLA class I histocompatibility antigen, Cw-6 alpha chain OS=Homo sapiens GN=HLA-C PE=1 SV=2	40.969	6
454	8.88	10.27	20.74	P61163	ACTZ_HUMAN	Alpha-centractin OS=Homo sapiens GN=ACTR1A PE=1 SV=1	42.614	5
455	8.86	8.87	51.85	P18859	ATP5J_HUMAN	ATP synthase-coupling factor 6, mitochondrial OS=Homo sapiens GN=ATP5J PE=1 SV=1	12.588	7
456	8.85	8.86	38.4	P62899	RL31_HUMAN	60S ribosomal protein L31 OS=Homo sapiens GN=RPL31 PE=1 SV=1	14.463	5
457	8.82	8.82	32.38	Q9Y3U8	RL36_HUMAN	60S ribosomal protein L36 OS=Homo sapiens GN=RPL36 PE=1 SV=3	12.254	5
458	8.78	8.83	12.31	Q9P2R7	SUCB1_HUMAN	Succinyl-CoA ligase [ADP-forming] subunit beta, mitochondrial OS=Homo sapiens GN=SUCLA2 PE=1 SV=3	50.317	7
459	8.78	8.78	19.72	Q14103	HNRPD_HUMAN	Heterogeneous nuclear ribonucleoprotein D0 OS=Homo sapiens GN=HNRNPD PE=1 SV=1	38.434	6
460	8.77	9.1	4.636	P35606	COPB2_HUMAN	Coatomer subunit beta' OS=Homo sapiens GN=COPB2 PE=1 SV=2	102.487	5
461	8.77	8.77	34.59	P51452	DUS3_HUMAN	Dual specificity protein phosphatase 3 OS=Homo sapiens GN=DUSP3 PE=1 SV=1	20.478	4
462	8.76	8.76	22.27	P24539	AT5F1_HUMAN	ATP synthase subunit b, mitochondrial OS=Homo sapiens GN=ATP5F1 PE=1 SV=2	28.909	5
463	8.73	8.84	33.54	P84103	SRSF3_HUMAN	Serine/arginine-rich splicing factor 3 OS=Homo sapiens GN=SRSF3 PE=1 SV=1	19.33	5
464	8.71	8.71	11.73	O43516	WIPF1_HUMAN	WAS/WASL-interacting protein family member 1 OS=Homo sapiens GN=WIPF1 PE=1 SV=3	51.258	5
465	8.64	8.91	8.637	P16615	AT2A2_HUMAN	Sarcoplasmic/endoplasmic reticulum calcium ATPase 2 OS=Homo sapiens GN=ATP2A2 PE=1 SV=1	114.757	6
466	8.63	9.22	21.4	P50914	RL14_HUMAN	60S ribosomal protein L14 OS=Homo sapiens GN=RPL14 PE=1 SV=4	23.432	4
467	8.58	8.76	9.912	Q13200	PSMD2_HUMAN	26S proteasome non-ATPase regulatory subunit 2 OS=Homo sapiens GN=PSMD2 PE=1 SV=3	100.2	5
468	8.55	8.61	17.3	Q9Y617	SERC_HUMAN	Phosphoserine aminotransferase OS=Homo sapiens GN=PSAT1 PE=1 SV=2	40.423	6
469	8.52	8.66	24.1	Q9ULZ3	ASC_HUMAN	Apoptosis-associated speck-like protein containing a CARD OS=Homo sapiens GN=PYCARD PE=1 SV=2	21.627	5
470	8.52	8.65	11.82	P24557	THAS_HUMAN	Thromboxane-A synthase OS=Homo sapiens GN=TBXAS1 PE=1 SV=3	60.518	5
471	8.52	8.57	9.748	Q99572	P2RX7_HUMAN	P2X purinoceptor 7 OS=Homo sapiens GN=P2RX7 PE=1 SV=4	68.585	4
472	8.51	8.52	18.51	Q13177	PAK2_HUMAN	Serine/threonine-protein kinase PAK 2 OS=Homo sapiens GN=PAK2 PE=1 SV=3	58.043	7
473	8.49	8.58	51.94	O95336	6PGL_HUMAN	6-phosphogluconolactonase OS=Homo sapiens GN=PGLS PE=1 SV=2	27.547	8
474	8.47	8.51	23.57	P62701	RS4X_HUMAN	40S ribosomal protein S4, X isoform OS=Homo sapiens GN=RPS4X PE=1 SV=2	29.598	6
475	8.47	8.47	34.3	O96000	NDUBA_HUMAN	NADH dehydrogenase [ubiquinone] 1 beta subcomplex subunit 10 OS=Homo sapiens GN=NDUFB10 PE=1 SV=3	20.777	5
476	8.46	8.62	12.04	Q8IV08	PLD3_HUMAN	Phospholipase D3 OS=Homo sapiens GN=PLD3 PE=1 SV=1	54.705	4
477	8.43	9.18	12.91	O94804	STK10_HUMAN	Serine/threonine-protein kinase 10 OS=Homo sapiens GN=STK10 PE=1 SV=1	112.135	8
478	8.43	8.51	14.89	P11117	PPAL_HUMAN	Lysosomal acid phosphatase OS=Homo sapiens GN=ACP2 PE=1 SV=3	48.344	5
479	8.41	8.41	27.78	O75347	TBCA_HUMAN	Tubulin-specific chaperone A OS=Homo sapiens GN=TBCA PE=1 SV=3	12.855	5
480	8.39	22.79	25.39	P35241	RADI_HUMAN	Radixin OS=Homo sapiens GN=RDX PE=1 SV=1	68.564	5
481	8.39	14.6	28.41	Q13162	PRDX4_HUMAN	Peroxiredoxin-4 OS=Homo sapiens GN=PRDX4 PE=1 SV=1	30.54	4
482	8.39	11.28	30.29	P20340	RAB6A_HUMAN	Ras-related protein Rab-6A OS=Homo sapiens GN=RAB6A PE=1 SV=3	23.593	6
483	8.38	8.59	6.128	Q01432	AMPD3_HUMAN	AMP deaminase 3 OS=Homo sapiens GN=AMPD3 PE=1 SV=1	88.812	5
484	8.37	9.98	26.35	P62195	PRS8_HUMAN	26S protease regulatory subunit 8 OS=Homo sapiens GN=PSMC5 PE=1 SV=1	45.626	8
485	8.37	8.55	15.59	P09651	ROA1_HUMAN	Heterogeneous nuclear ribonucleoprotein A1 OS=Homo sapiens GN=HNRNPA1 PE=1 SV=5	38.747	5
486	8.37	8.44	10.88	P05771	KPCB_HUMAN	Protein kinase C beta type OS=Homo sapiens GN=PRKCB PE=1 SV=4	76.869	5
487	8.36	8.52	25.1	P38117	ETFB_HUMAN	Electron transfer flavoprotein subunit beta OS=Homo sapiens GN=ETFB PE=1 SV=3	27.844	6
488	8.35	8.43	8.093	Q7Z2W4	ZCCHV_HUMAN	Zinc finger CCCH-type antiviral protein 1 OS=Homo sapiens GN=ZC3HAV1 PE=1 SV=3	101.431	5
489	8.35	8.36	15.73	Q9BQE5	APOL2_HUMAN	Apolipoprotein L2 OS=Homo sapiens GN=APOL2 PE=1 SV=1	37.092	5
490	8.34	8.47	23.24	P69905	HBA_HUMAN	Hemoglobin subunit alpha OS=Homo sapiens GN=HBA1 PE=1 SV=2	15.258	5
491	8.32	8.43	6.467	P48960	CD97_HUMAN	CD97 antigen OS=Homo sapiens GN=CD97 PE=1 SV=4	91.869	4
492	8.31	8.77	11.77	O95202	LETM1_HUMAN	LETM1 and EF-hand domain-containing protein 1, mitochondrial OS=Homo sapiens GN=LETM1 PE=1 SV=1	83.354	6
493	8.31	8.59	9.949	Q15833	STXB2_HUMAN	Syntaxin-binding protein 2 OS=Homo sapiens GN=STXBP2 PE=1 SV=2	66.453	4
494	8.31	8.43	16.22	Q9UNZ2	NSF1C_HUMAN	NSFL1 cofactor p47 OS=Homo sapiens GN=NSFL1C PE=1 SV=2	40.573	5
495	8.3	8.35	11.04	O75351	VPS4B_HUMAN	Vacuolar protein sorting-associated protein 4B OS=Homo sapiens GN=VPS4B PE=1 SV=2	49.302	4
496	8.27	8.28	17.31	Q96HE7	ERO1A_HUMAN	ERO1-like protein alpha OS=Homo sapiens GN=ERO1L PE=1 SV=2	54.393	5
497	8.26	8.27	24.65	Q13765	NACA_HUMAN	Nascent polypeptide-associated complex subunit alpha OS=Homo sapiens GN=NACA PE=1 SV=1	23.384	4
498	8.25	10.64	8.667	Q8N163	K1967_HUMAN	DBIRD complex subunit KIAA1967 OS=Homo sapiens GN=KIAA1967 PE=1 SV=2	102.902	4
499	8.24	8.32	5.579	Q06210	GFPT1_HUMAN	Glucosamine--fructose-6-phosphate aminotransferase [isomerizing] 1 OS=Homo sapiens GN=GFPT1 PE=1 SV=3	78.806	5
500	8.24	8.28	21.01	P62917	RL8_HUMAN	60S ribosomal protein L8 OS=Homo sapiens GN=RPL8 PE=1 SV=2	28.025	5
501	8.21	10.45	22.48	P36542	ATPG_HUMAN	ATP synthase subunit gamma, mitochondrial OS=Homo sapiens GN=ATP5C1 PE=1 SV=1	32.996	5
502	8.2	8.43	11.41	P17858	K6PL_HUMAN	6-phosphofructokinase, liver type OS=Homo sapiens GN=PFKL PE=1 SV=6	85.018	5
503	8.2	8.31	18.83	P09936	UCHL1_HUMAN	Ubiquitin carboxyl-terminal hydrolase isozyme L1 OS=Homo sapiens GN=UCHL1 PE=1 SV=2	24.824	4
504	8.2	8.24	26.46	O00233	PSMD9_HUMAN	26S proteasome non-ATPase regulatory subunit 9 OS=Homo sapiens GN=PSMD9 PE=1 SV=3	24.682	5
505	8.19	8.27	22.28	O43488	ARK72_HUMAN	Aflatoxin B1 aldehyde reductase member 2 OS=Homo sapiens GN=AKR7A2 PE=1 SV=3	39.589	7
506	8.19	8.2	31.62	P61353	RL27_HUMAN	60S ribosomal protein L27 OS=Homo sapiens GN=RPL27 PE=1 SV=2	15.798	4
507	8.18	8.49	10.04	Q13884	SNTB1_HUMAN	Beta-1-syntrophin OS=Homo sapiens GN=SNTB1 PE=1 SV=3	58.061	5
508	8.16	8.36	6.81	Q13724	MOGS_HUMAN	Mannosyl-oligosaccharide glucosidase OS=Homo sapiens GN=MOGS PE=1 SV=5	91.918	4
509	8.13	8.21	8.992	P42331	RHG25_HUMAN	Rho GTPase-activating protein 25 OS=Homo sapiens GN=ARHGAP25 PE=1 SV=2	73.435	5
510	8.11	8.25	6.53	Q9NZB2	F120A_HUMAN	Constitutive coactivator of PPAR-gamma-like protein 1 OS=Homo sapiens GN=FAM120A PE=1 SV=2	121.888	5
511	8.11	8.11	16.23	P16930	FAAA_HUMAN	Fumarylacetoacetase OS=Homo sapiens GN=FAH PE=1 SV=2	46.374	5
512	8.1	9.33	19.32	O75489	NDUS3_HUMAN	NADH dehydrogenase [ubiquinone] iron-sulfur protein 3, mitochondrial OS=Homo sapiens GN=NDUFS3 PE=1 SV=1	30.242	5
513	8.1	8.27	27.35	P27144	KAD4_HUMAN	Adenylate kinase isoenzyme 4, mitochondrial OS=Homo sapiens GN=AK4 PE=1 SV=1	25.268	5
514	8.08	8.11	16.37	P55209	NP1L1_HUMAN	Nucleosome assembly protein 1-like 1 OS=Homo sapiens GN=NAP1L1 PE=1 SV=1	45.374	5
515	8.07	8.15	29.89	P35270	SPRE_HUMAN	Sepiapterin reductase OS=Homo sapiens GN=SPR PE=1 SV=1	28.048	5
516	8.07	8.14	7.25	P16150	LEUK_HUMAN	Leukosialin OS=Homo sapiens GN=SPN PE=1 SV=1	40.322	4
517	8.06	8.16	5.927	Q9BZQ8	NIBAN_HUMAN	Protein Niban OS=Homo sapiens GN=FAM129A PE=1 SV=1	103.135	4
518	8.06	8.11	14.86	P28062	PSB8_HUMAN	Proteasome subunit beta type-8 OS=Homo sapiens GN=PSMB8 PE=1 SV=3	30.354	4
519	8.06	8.11	26.63	P13073	COX41_HUMAN	Cytochrome c oxidase subunit 4 isoform 1, mitochondrial OS=Homo sapiens GN=COX4I1 PE=1 SV=1	19.577	5
520	8.06	8.07	19.09	P28066	PSA5_HUMAN	Proteasome subunit alpha type-5 OS=Homo sapiens GN=PSMA5 PE=1 SV=3	26.411	4
521	8.05	8.35	13.98	Q9NUV9	GIMA4_HUMAN	GTPase IMAP family member 4 OS=Homo sapiens GN=GIMAP4 PE=1 SV=1	37.534	4
522	8.05	8.05	16.06	P21291	CSRP1_HUMAN	Cysteine and glycine-rich protein 1 OS=Homo sapiens GN=CSRP1 PE=1 SV=3	20.567	4
523	8.05	8.05	39.78	P05109	S10A8_HUMAN	Protein S100-A8 OS=Homo sapiens GN=S100A8 PE=1 SV=1	10.835	4
524	8.04	8.21	6.809	Q5T1M5	FKB15_HUMAN	FK506-binding protein 15 OS=Homo sapiens GN=FKBP15 PE=1 SV=2	133.63	6
525	8.04	8.18	11.25	P53602	MVD1_HUMAN	Diphosphomevalonate decarboxylase OS=Homo sapiens GN=MVD PE=1 SV=1	43.405	4
526	8.03	8.16	6.264	Q641Q2	FA21A_HUMAN	WASH complex subunit FAM21A OS=Homo sapiens GN=FAM21A PE=1 SV=3	147.184	5
527	8.02	8.16	43.33	P06703	S10A6_HUMAN	Protein S100-A6 OS=Homo sapiens GN=S100A6 PE=1 SV=1	10.18	5
528	8.02	8.07	8.817	P55010	IF5_HUMAN	Eukaryotic translation initiation factor 5 OS=Homo sapiens GN=EIF5 PE=1 SV=2	49.223	4
529	8.02	8.03	7.692	P07099	HYEP_HUMAN	Epoxide hydrolase 1 OS=Homo sapiens GN=EPHX1 PE=1 SV=1	52.949	4
530	8.01	8.12	18.27	Q8NBJ7	SUMF2_HUMAN	Sulfatase-modifying factor 2 OS=Homo sapiens GN=SUMF2 PE=1 SV=2	33.843	4
531	8.01	8.11	9.268	Q96CM8	ACSF2_HUMAN	Acyl-CoA synthetase family member 2, mitochondrial OS=Homo sapiens GN=ACSF2 PE=1 SV=2	68.125	5
532	8.01	8.02	11.95	P18031	PTN1_HUMAN	Tyrosine-protein phosphatase non-receptor type 1 OS=Homo sapiens GN=PTPN1 PE=1 SV=1	49.967	4
533	8	8.04	23.33	P50479	PDLI4_HUMAN	PDZ and LIM domain protein 4 OS=Homo sapiens GN=PDLIM4 PE=1 SV=2	35.398	4
534	8	8.01	21.61	O14828	SCAM3_HUMAN	Secretory carrier-associated membrane protein 3 OS=Homo sapiens GN=SCAMP3 PE=1 SV=3	38.287	5
535	8	8	10.87	Q99961	SH3G1_HUMAN	Endophilin-A2 OS=Homo sapiens GN=SH3GL1 PE=1 SV=1	41.49	4
536	8	8	50.78	P35268	RL22_HUMAN	60S ribosomal protein L22 OS=Homo sapiens GN=RPL22 PE=1 SV=2	14.787	4
537	7.98	7.98	27.17	Q04760	LGUL_HUMAN	Lactoylglutathione lyase OS=Homo sapiens GN=GLO1 PE=1 SV=4	20.778	5
538	7.97	8	52.75	P07919	QCR6_HUMAN	Cytochrome b-c1 complex subunit 6, mitochondrial OS=Homo sapiens GN=UQCRH PE=1 SV=2	10.739	4
539	7.93	8	21.31	P24752	THIL_HUMAN	Acetyl-CoA acetyltransferase, mitochondrial OS=Homo sapiens GN=ACAT1 PE=1 SV=1	45.2	8
540	7.86	7.91	22.07	P61254	RL26_HUMAN	60S ribosomal protein L26 OS=Homo sapiens GN=RPL26 PE=1 SV=1	17.258	5
541	7.81	8.41	7.267	O95782	AP2A1_HUMAN	AP-2 complex subunit alpha-1 OS=Homo sapiens GN=AP2A1 PE=1 SV=3	107.546	6
542	7.8	8	9.783	Q9NSE4	SYIM_HUMAN	Isoleucine--tRNA ligase, mitochondrial OS=Homo sapiens GN=IARS2 PE=1 SV=2	113.792	7
543	7.73	11.57	20.25	P15121	ALDR_HUMAN	Aldose reductase OS=Homo sapiens GN=AKR1B1 PE=1 SV=3	35.853	5
544	7.72	7.78	29.52	Q9UIJ7	KAD3_HUMAN	GTP:AMP phosphotransferase, mitochondrial OS=Homo sapiens GN=AK3 PE=1 SV=4	25.565	5
545	7.66	7.66	28.74	Q9NVS9	PNPO_HUMAN	Pyridoxine-5'-phosphate oxidase OS=Homo sapiens GN=PNPO PE=1 SV=1	29.988	5
546	7.65	8.15	5.886	P07814	SYEP_HUMAN	Bifunctional glutamate/proline--tRNA ligase OS=Homo sapiens GN=EPRS PE=1 SV=5	170.591	7
547	7.64	7.69	15.65	Q9UIB8	SLAF5_HUMAN	SLAM family member 5 OS=Homo sapiens GN=CD84 PE=1 SV=1	38.782	4
548	7.61	7.81	20	Q16539	MK14_HUMAN	Mitogen-activated protein kinase 14 OS=Homo sapiens GN=MAPK14 PE=1 SV=3	41.293	4
549	7.58	11.84	34.5	P61026	RAB10_HUMAN	Ras-related protein Rab-10 OS=Homo sapiens GN=RAB10 PE=1 SV=1	22.541	5
550	7.51	7.52	30.05	P37235	HPCL1_HUMAN	Hippocalcin-like protein 1 OS=Homo sapiens GN=HPCAL1 PE=1 SV=3	22.313	6
551	7.48	7.52	19.79	Q13126	MTAP_HUMAN	S-methyl-5'-thioadenosine phosphorylase OS=Homo sapiens GN=MTAP PE=1 SV=2	31.236	4
552	7.46	7.61	19.92	P51572	BAP31_HUMAN	B-cell receptor-associated protein 31 OS=Homo sapiens GN=BCAP31 PE=1 SV=3	27.992	6
553	7.46	7.51	21.3	P62826	RAN_HUMAN	GTP-binding nuclear protein Ran OS=Homo sapiens GN=RAN PE=1 SV=3	24.423	4
554	7.4	7.45	27.33	Q9UMY4	SNX12_HUMAN	Sorting nexin-12 OS=Homo sapiens GN=SNX12 PE=1 SV=3	19.73	4
555	7.39	7.39	7.856	P23588	IF4B_HUMAN	Eukaryotic translation initiation factor 4B OS=Homo sapiens GN=EIF4B PE=1 SV=2	69.151	5
556	7.34	7.35	39.42	P62241	RS8_HUMAN	40S ribosomal protein S8 OS=Homo sapiens GN=RPS8 PE=1 SV=2	24.205	8
557	7.33	7.4	31.84	P52566	GDIR2_HUMAN	Rho GDP-dissociation inhibitor 2 OS=Homo sapiens GN=ARHGDIB PE=1 SV=3	22.988	5
558	7.31	7.4	20.98	P62266	RS23_HUMAN	40S ribosomal protein S23 OS=Homo sapiens GN=RPS23 PE=1 SV=3	15.808	3
559	7.27	7.4	9.424	P21283	VATC1_HUMAN	V-type proton ATPase subunit C 1 OS=Homo sapiens GN=ATP6V1C1 PE=1 SV=4	43.942	4
560	7.26	7.37	11.2	Q5TEJ8	THMS2_HUMAN	Protein THEMIS2 OS=Homo sapiens GN=THEMIS2 PE=2 SV=1	72.049	4
561	7.25	8.08	25.33	P24534	EF1B_HUMAN	Elongation factor 1-beta OS=Homo sapiens GN=EEF1B2 PE=1 SV=3	24.764	6
562	7.22	9.29	34.42	P61106	RAB14_HUMAN	Ras-related protein Rab-14 OS=Homo sapiens GN=RAB14 PE=1 SV=4	23.897	5
563	7.21	7.25	27.39	P98179	RBM3_HUMAN	Putative RNA-binding protein 3 OS=Homo sapiens GN=RBM3 PE=1 SV=1	17.17	4
564	7.2	7.21	10.59	O60506	HNRPQ_HUMAN	Heterogeneous nuclear ribonucleoprotein Q OS=Homo sapiens GN=SYNCRIP PE=1 SV=2	69.603	6
565	7.16	7.32	19.19	P46777	RL5_HUMAN	60S ribosomal protein L5 OS=Homo sapiens GN=RPL5 PE=1 SV=3	34.363	5
566	7.1	7.16	16.67	P30520	PURA2_HUMAN	Adenylosuccinate synthetase isozyme 2 OS=Homo sapiens GN=ADSS PE=1 SV=3	50.097	5
567	7.09	7.24	6.742	Q8WZA9	IRGQ_HUMAN	Immunity-related GTPase family Q protein OS=Homo sapiens GN=IRGQ PE=1 SV=1	62.717	4
568	7.08	7.15	14.14	P35813	PPM1A_HUMAN	Protein phosphatase 1A OS=Homo sapiens GN=PPM1A PE=1 SV=1	42.448	5
569	7.06	7.06	30.77	P49207	RL34_HUMAN	60S ribosomal protein L34 OS=Homo sapiens GN=RPL34 PE=1 SV=3	13.293	4
570	7.03	7.1	21.72	P30084	ECHM_HUMAN	Enoyl-CoA hydratase, mitochondrial OS=Homo sapiens GN=ECHS1 PE=1 SV=4	31.387	4
571	7.01	9.17	12.78	Q12931	TRAP1_HUMAN	Heat shock protein 75 kDa, mitochondrial OS=Homo sapiens GN=TRAP1 PE=1 SV=3	80.11	6
572	7	7.09	42.05	Q99653	CHP1_HUMAN	Calcium-binding protein p22 OS=Homo sapiens GN=CHP PE=1 SV=3	22.456	6
573	6.99	7.28	9.165	P22570	ADRO_HUMAN	NADPH:adrenodoxin oxidoreductase, mitochondrial OS=Homo sapiens GN=FDXR PE=1 SV=3	53.837	4
574	6.98	7.02	10.84	P12956	XRCC6_HUMAN	X-ray repair cross-complementing protein 6 OS=Homo sapiens GN=XRCC6 PE=1 SV=2	69.843	5
575	6.97	6.98	6.032	O43852	CALU_HUMAN	Calumenin OS=Homo sapiens GN=CALU PE=1 SV=2	37.107	4
576	6.87	10.13	17.39	Q9H9B4	SFXN1_HUMAN	Sideroflexin-1 OS=Homo sapiens GN=SFXN1 PE=1 SV=4	35.619	4
577	6.87	7.24	2.619	Q3V6T2	GRDN_HUMAN	Girdin OS=Homo sapiens GN=CCDC88A PE=1 SV=2	216.042	5
578	6.83	7	3.554	P46939	UTRO_HUMAN	Utrophin OS=Homo sapiens GN=UTRN PE=1 SV=2	394.466	8
579	6.81	6.87	16.53	Q7L591	DOK3_HUMAN	Docking protein 3 OS=Homo sapiens GN=DOK3 PE=1 SV=2	53.288	7
580	6.79	6.9	17.37	O00154	BACH_HUMAN	Cytosolic acyl coenzyme A thioester hydrolase OS=Homo sapiens GN=ACOT7 PE=1 SV=3	41.796	5
581	6.78	7.02	9.664	P10253	LYAG_HUMAN	Lysosomal alpha-glucosidase OS=Homo sapiens GN=GAA PE=1 SV=4	105.324	7
582	6.72	6.89	4.184	Q5VZ89	DEN4C_HUMAN	DENN domain-containing protein 4C OS=Homo sapiens GN=DENND4C PE=1 SV=2	186.857	5
583	6.65	7.08	8.964	P10515	ODP2_HUMAN	Dihydrolipoyllysine-residue acetyltransferase component of pyruvate dehydrogenase complex, mitochondrial OS=Homo sapiens GN=DLAT PE=1 SV=3	68.997	3
584	6.64	6.66	27.04	P30085	KCY_HUMAN	UMP-CMP kinase OS=Homo sapiens GN=CMPK1 PE=1 SV=3	22.222	6
585	6.63	6.64	15.88	O75563	SKAP2_HUMAN	Src kinase-associated phosphoprotein 2 OS=Homo sapiens GN=SKAP2 PE=1 SV=1	41.217	5
586	6.62	6.7	4.692	Q9Y2J2	E41L3_HUMAN	Band 4.1-like protein 3 OS=Homo sapiens GN=EPB41L3 PE=1 SV=2	120.678	5
587	6.62	6.69	19.15	O15127	SCAM2_HUMAN	Secretory carrier-associated membrane protein 2 OS=Homo sapiens GN=SCAMP2 PE=1 SV=2	36.649	5
588	6.6	6.7	15.97	Q02878	RL6_HUMAN	60S ribosomal protein L6 OS=Homo sapiens GN=RPL6 PE=1 SV=3	32.728	6
589	6.58	7.56	7.809	Q92598	HS105_HUMAN	Heat shock protein 105 kDa OS=Homo sapiens GN=HSPH1 PE=1 SV=1	96.865	5
590	6.57	6.71	4.162	Q99613	EIF3C_HUMAN	Eukaryotic translation initiation factor 3 subunit C OS=Homo sapiens GN=EIF3C PE=1 SV=1	105.344	3
591	6.55	7.15	4.725	Q8TCS8	PNPT1_HUMAN	Polyribonucleotide nucleotidyltransferase 1, mitochondrial OS=Homo sapiens GN=PNPT1 PE=1 SV=2	85.951	3
592	6.55	6.56	17.18	O00182	LEG9_HUMAN	Galectin-9 OS=Homo sapiens GN=LGALS9 PE=1 SV=2	39.518	5
593	6.54	6.69	7.22	P49757	NUMB_HUMAN	Protein numb homolog OS=Homo sapiens GN=NUMB PE=1 SV=2	70.804	5
594	6.54	6.69	16.26	P40429	RL13A_HUMAN	60S ribosomal protein L13a OS=Homo sapiens GN=RPL13A PE=1 SV=2	23.577	4
595	6.47	16.45	19.86	Q9P1U1	ARP3B_HUMAN	Actin-related protein 3B OS=Homo sapiens GN=ACTR3B PE=1 SV=1	47.608	4
596	6.47	6.8	2.104	Q6ZS81	WDFY4_HUMAN	WD repeat- and FYVE domain-containing protein 4 OS=Homo sapiens GN=WDFY4 PE=1 SV=3	353.61	6
597	6.47	6.48	5.67	P50281	MMP14_HUMAN	Matrix metalloproteinase-14 OS=Homo sapiens GN=MMP14 PE=1 SV=3	65.894	3
598	6.45	6.91	19.73	P45880	VDAC2_HUMAN	Voltage-dependent anion-selective channel protein 2 OS=Homo sapiens GN=VDAC2 PE=1 SV=2	31.567	5
599	6.45	6.5	8.54	Q32MZ4	LRRF1_HUMAN	Leucine-rich repeat flightless-interacting protein 1 OS=Homo sapiens GN=LRRFIP1 PE=1 SV=2	89.253	4
600	6.44	6.45	11.51	Q86UE4	LYRIC_HUMAN	Protein LYRIC OS=Homo sapiens GN=MTDH PE=1 SV=2	63.837	4
601	6.43	6.64	27.98	P08134	RHOC_HUMAN	Rho-related GTP-binding protein RhoC OS=Homo sapiens GN=RHOC PE=1 SV=1	22.006	5
602	6.43	6.63	8.929	Q8NHJ6	LIRB4_HUMAN	Leukocyte immunoglobulin-like receptor subfamily B member 4 OS=Homo sapiens GN=LILRB4 PE=1 SV=3	49.356	3
603	6.41	6.45	14.03	Q01130	SRSF2_HUMAN	Serine/arginine-rich splicing factor 2 OS=Homo sapiens GN=SRSF2 PE=1 SV=4	25.476	3
604	6.4	6.83	5.932	P41091	IF2G_HUMAN	Eukaryotic translation initiation factor 2 subunit 3 OS=Homo sapiens GN=EIF2S3 PE=1 SV=3	51.109	3
605	6.4	6.53	6.073	Q9C0C2	TB182_HUMAN	182 kDa tankyrase-1-binding protein OS=Homo sapiens GN=TNKS1BP1 PE=1 SV=4	181.796	7
606	6.4	6.47	12.59	Q9HA77	SYCM_HUMAN	Probable cysteine--tRNA ligase, mitochondrial OS=Homo sapiens GN=CARS2 PE=1 SV=1	62.224	5
607	6.39	6.69	12.12	O00170	AIP_HUMAN	AH receptor-interacting protein OS=Homo sapiens GN=AIP PE=1 SV=2	37.636	3
608	6.37	6.53	38.71	P62993	GRB2_HUMAN	Growth factor receptor-bound protein 2 OS=Homo sapiens GN=GRB2 PE=1 SV=1	25.206	7
609	6.37	6.41	8.696	P08621	RU17_HUMAN	U1 small nuclear ribonucleoprotein 70 kDa OS=Homo sapiens GN=SNRNP70 PE=1 SV=2	51.557	5
610	6.36	6.45	17.99	P00491	PNPH_HUMAN	Purine nucleoside phosphorylase OS=Homo sapiens GN=PNP PE=1 SV=2	32.118	4
611	6.36	6.38	15.54	P46776	RL27A_HUMAN	60S ribosomal protein L27a OS=Homo sapiens GN=RPL27A PE=1 SV=2	16.561	3
612	6.35	6.44	11.55	P14314	GLU2B_HUMAN	Glucosidase 2 subunit beta OS=Homo sapiens GN=PRKCSH PE=1 SV=2	59.425	6
613	6.34	8.5	28.8	P84095	RHOG_HUMAN	Rho-related GTP-binding protein RhoG OS=Homo sapiens GN=RHOG PE=1 SV=1	21.309	3
614	6.34	6.38	15.62	Q9Y371	SHLB1_HUMAN	Endophilin-B1 OS=Homo sapiens GN=SH3GLB1 PE=1 SV=1	40.796	5
615	6.34	6.35	23.92	P49407	ARRB1_HUMAN	Beta-arrestin-1 OS=Homo sapiens GN=ARRB1 PE=1 SV=2	47.066	6
616	6.33	6.65	4.596	P41252	SYIC_HUMAN	Isoleucine--tRNA ligase, cytoplasmic OS=Homo sapiens GN=IARS PE=1 SV=2	144.498	4
617	6.32	6.39	25.91	P17174	AATC_HUMAN	Aspartate aminotransferase, cytoplasmic OS=Homo sapiens GN=GOT1 PE=1 SV=3	46.248	8
618	6.31	9.61	16.07	P06865	HEXA_HUMAN	Beta-hexosaminidase subunit alpha OS=Homo sapiens GN=HEXA PE=1 SV=2	60.703	6
619	6.31	6.54	14.76	P42167	LAP2B_HUMAN	Lamina-associated polypeptide 2, isoforms beta/gamma OS=Homo sapiens GN=TMPO PE=1 SV=2	50.67	4
620	6.31	6.31	21.77	P63244	GBLP_HUMAN	Guanine nucleotide-binding protein subunit beta-2-like 1 OS=Homo sapiens GN=GNB2L1 PE=1 SV=3	35.077	5
621	6.29	6.32	20.45	Q9HC38	GLOD4_HUMAN	Glyoxalase domain-containing protein 4 OS=Homo sapiens GN=GLOD4 PE=1 SV=1	34.793	5
622	6.28	6.41	8.741	P45974	UBP5_HUMAN	Ubiquitin carboxyl-terminal hydrolase 5 OS=Homo sapiens GN=USP5 PE=1 SV=2	95.786	5
623	6.28	6.37	11.94	Q9NY33	DPP3_HUMAN	Dipeptidyl peptidase 3 OS=Homo sapiens GN=DPP3 PE=1 SV=2	82.589	5
624	6.27	6.28	12.18	Q12904	AIMP1_HUMAN	Aminoacyl tRNA synthase complex-interacting multifunctional protein 1 OS=Homo sapiens GN=AIMP1 PE=1 SV=2	34.353	3
625	6.25	8.48	14.56	Q9ULV4	COR1C_HUMAN	Coronin-1C OS=Homo sapiens GN=CORO1C PE=1 SV=1	53.249	6
626	6.24	9.83	17.95	P62191	PRS4_HUMAN	26S protease regulatory subunit 4 OS=Homo sapiens GN=PSMC1 PE=1 SV=1	49.185	5
627	6.24	6.4	7.178	Q6ICG6	K0930_HUMAN	Uncharacterized protein KIAA0930 OS=Homo sapiens GN=KIAA0930 PE=1 SV=1	45.794	3
628	6.24	6.32	10.75	Q92890	UFD1_HUMAN	Ubiquitin fusion degradation protein 1 homolog OS=Homo sapiens GN=UFD1L PE=1 SV=3	34.5	3
629	6.22	6.34	8.619	P06737	PYGL_HUMAN	Glycogen phosphorylase, liver form OS=Homo sapiens GN=PYGL PE=1 SV=4	97.149	4
630	6.21	6.5	5.065	Q8TC07	TBC15_HUMAN	TBC1 domain family member 15 OS=Homo sapiens GN=TBC1D15 PE=1 SV=2	79.491	3
631	6.21	6.27	19.05	Q16543	CDC37_HUMAN	Hsp90 co-chaperone Cdc37 OS=Homo sapiens GN=CDC37 PE=1 SV=1	44.468	6
632	6.21	6.25	15.2	P61313	RL15_HUMAN	60S ribosomal protein L15 OS=Homo sapiens GN=RPL15 PE=1 SV=2	24.146	4
633	6.2	6.41	2.725	Q9UQ35	SRRM2_HUMAN	Serine/arginine repetitive matrix protein 2 OS=Homo sapiens GN=SRRM2 PE=1 SV=2	299.615	5
634	6.2	6.28	8.649	Q92499	DDX1_HUMAN	ATP-dependent RNA helicase DDX1 OS=Homo sapiens GN=DDX1 PE=1 SV=2	82.432	5
635	6.2	6.23	19.42	P11234	RALB_HUMAN	Ras-related protein Ral-B OS=Homo sapiens GN=RALB PE=1 SV=1	23.409	5
636	6.19	10.94	23.29	Q15366	PCBP2_HUMAN	Poly(rC)-binding protein 2 OS=Homo sapiens GN=PCBP2 PE=1 SV=1	38.58	3
637	6.19	6.26	28.32	Q9Y2Q3	GSTK1_HUMAN	Glutathione S-transferase kappa 1 OS=Homo sapiens GN=GSTK1 PE=1 SV=3	25.497	6
638	6.19	6.19	27.2	Q99714	HCD2_HUMAN	3-hydroxyacyl-CoA dehydrogenase type-2 OS=Homo sapiens GN=HSD17B10 PE=1 SV=3	26.923	5
639	6.18	6.25	20.16	O15212	PFD6_HUMAN	Prefoldin subunit 6 OS=Homo sapiens GN=PFDN6 PE=1 SV=1	14.583	3
640	6.17	6.28	12.56	P00505	AATM_HUMAN	Aspartate aminotransferase, mitochondrial OS=Homo sapiens GN=GOT2 PE=1 SV=3	47.518	5
641	6.17	6.23	22.86	P02792	FRIL_HUMAN	Ferritin light chain OS=Homo sapiens GN=FTL PE=1 SV=2	20.02	3
642	6.16	6.29	8.389	Q12906	ILF3_HUMAN	Interleukin enhancer-binding factor 3 OS=Homo sapiens GN=ILF3 PE=1 SV=3	95.338	5
643	6.16	6.19	10.5	P14324	FPPS_HUMAN	Farnesyl pyrophosphate synthase OS=Homo sapiens GN=FDPS PE=1 SV=4	48.275	3
644	6.16	6.18	26.99	Q13526	PIN1_HUMAN	Peptidyl-prolyl cis-trans isomerase NIMA-interacting 1 OS=Homo sapiens GN=PIN1 PE=1 SV=1	18.243	4
645	6.14	6.23	23.55	Q86Y82	STX12_HUMAN	Syntaxin-12 OS=Homo sapiens GN=STX12 PE=1 SV=1	31.642	5
646	6.13	8.49	31.82	P32119	PRDX2_HUMAN	Peroxiredoxin-2 OS=Homo sapiens GN=PRDX2 PE=1 SV=5	21.892	5
647	6.13	6.19	17.76	P52788	SPSY_HUMAN	Spermine synthase OS=Homo sapiens GN=SMS PE=1 SV=2	41.268	4
648	6.12	8.21	17.71	P21964	COMT_HUMAN	Catechol O-methyltransferase OS=Homo sapiens GN=COMT PE=1 SV=2	30.037	3
649	6.12	6.23	42.41	O75340	PDCD6_HUMAN	Programmed cell death protein 6 OS=Homo sapiens GN=PDCD6 PE=1 SV=1	21.868	4
650	6.11	6.24	18.13	O60711	LPXN_HUMAN	Leupaxin OS=Homo sapiens GN=LPXN PE=1 SV=1	43.332	4
651	6.11	6.21	15.16	Q8IZP0	ABI1_HUMAN	Abl interactor 1 OS=Homo sapiens GN=ABI1 PE=1 SV=4	55.081	4
652	6.09	6.31	2.204	Q9UKK3	PARP4_HUMAN	Poly [ADP-ribose] polymerase 4 OS=Homo sapiens GN=PARP4 PE=1 SV=3	192.595	3
653	6.09	6.19	7.234	Q6P996	PDXD1_HUMAN	Pyridoxal-dependent decarboxylase domain-containing protein 1 OS=Homo sapiens GN=PDXDC1 PE=1 SV=2	86.707	5
654	6.08	11.99	29.32	P30456	1A43_HUMAN	HLA class I histocompatibility antigen, A-43 alpha chain OS=Homo sapiens GN=HLA-A PE=2 SV=1	41.033	3
655	6.08	6.47	4.61	O15357	SHIP2_HUMAN	Phosphatidylinositol 3,4,5-trisphosphate 5-phosphatase 2 OS=Homo sapiens GN=INPPL1 PE=1 SV=2	138.599	5
656	6.08	6.24	7.474	O94925	GLSK_HUMAN	Glutaminase kidney isoform, mitochondrial OS=Homo sapiens GN=GLS PE=1 SV=1	73.461	3
657	6.08	6.2	7.888	O00534	VMA5A_HUMAN	von Willebrand factor A domain-containing protein 5A OS=Homo sapiens GN=VWA5A PE=2 SV=2	86.489	4
658	6.08	6.08	13.65	P19404	NDUV2_HUMAN	NADH dehydrogenase [ubiquinone] flavoprotein 2, mitochondrial OS=Homo sapiens GN=NDUFV2 PE=1 SV=2	27.392	3
659	6.07	6.13	19.11	P83731	RL24_HUMAN	60S ribosomal protein L24 OS=Homo sapiens GN=RPL24 PE=1 SV=1	17.779	3
660	6.07	6.07	22.73	Q9UHV9	PFD2_HUMAN	Prefoldin subunit 2 OS=Homo sapiens GN=PFDN2 PE=1 SV=1	16.648	3
661	6.06	6.74	6.559	Q86UP2	KTN1_HUMAN	Kinectin OS=Homo sapiens GN=KTN1 PE=1 SV=1	156.275	6
662	6.06	6.21	6.393	Q14974	IMB1_HUMAN	Importin subunit beta-1 OS=Homo sapiens GN=KPNB1 PE=1 SV=2	97.17	4
663	6.06	6.11	14.29	Q53T59	H1BP3_HUMAN	HCLS1-binding protein 3 OS=Homo sapiens GN=HS1BP3 PE=1 SV=1	42.78	4
664	6.06	6.08	70.24	P30047	GFRP_HUMAN	GTP cyclohydrolase 1 feedback regulatory protein OS=Homo sapiens GN=GCHFR PE=1 SV=3	9.698	4
665	6.06	6.06	23.26	P13693	TCTP_HUMAN	Translationally-controlled tumor protein OS=Homo sapiens GN=TPT1 PE=1 SV=1	19.595	3
666	6.06	6.06	45.61	P06702	S10A9_HUMAN	Protein S100-A9 OS=Homo sapiens GN=S100A9 PE=1 SV=1	13.242	5
667	6.05	6.27	5.465	P16278	BGAL_HUMAN	Beta-galactosidase OS=Homo sapiens GN=GLB1 PE=1 SV=2	76.075	3
668	6.04	6.24	11.28	P12268	IMDH2_HUMAN	Inosine-5'-monophosphate dehydrogenase 2 OS=Homo sapiens GN=IMPDH2 PE=1 SV=2	55.805	5
669	6.04	6.15	17.65	Q16864	VATF_HUMAN	V-type proton ATPase subunit F OS=Homo sapiens GN=ATP6V1F PE=1 SV=2	13.37	3
670	6.04	6.04	20.98	Q00688	FKBP3_HUMAN	Peptidyl-prolyl cis-trans isomerase FKBP3 OS=Homo sapiens GN=FKBP3 PE=1 SV=1	25.177	5
671	6.04	6.04	35.71	P63241	IF5A1_HUMAN	Eukaryotic translation initiation factor 5A-1 OS=Homo sapiens GN=EIF5A PE=1 SV=2	16.832	4
672	6.03	10.22	12.46	Q14195	DPYL3_HUMAN	Dihydropyrimidinase-related protein 3 OS=Homo sapiens GN=DPYSL3 PE=1 SV=1	61.963	3
673	6.03	6.62	11.4	P54687	BCAT1_HUMAN	Branched-chain-amino-acid aminotransferase, cytosolic OS=Homo sapiens GN=BCAT1 PE=1 SV=3	42.966	4
674	6.03	6.39	6.985	Q9NTJ5	SAC1_HUMAN	Phosphatidylinositide phosphatase SAC1 OS=Homo sapiens GN=SACM1L PE=1 SV=2	66.967	3
675	6.03	6.15	6.282	Q9NSD9	SYFB_HUMAN	Phenylalanine--tRNA ligase beta subunit OS=Homo sapiens GN=FARSB PE=1 SV=3	66.116	3
676	6.03	6.12	4.286	P98082	DAB2_HUMAN	Disabled homolog 2 OS=Homo sapiens GN=DAB2 PE=1 SV=3	82.448	3
677	6.02	6.33	14.85	P29466	CASP1_HUMAN	Caspase-1 OS=Homo sapiens GN=CASP1 PE=1 SV=1	45.159	5
678	6.02	6.11	8.571	P21730	C5AR_HUMAN	C5a anaphylatoxin chemotactic receptor OS=Homo sapiens GN=C5AR1 PE=1 SV=2	39.336	4
679	6.02	6.1	7.958	P55036	PSMD4_HUMAN	26S proteasome non-ATPase regulatory subunit 4 OS=Homo sapiens GN=PSMD4 PE=1 SV=1	40.737	3
680	6.02	6.08	18.96	O75436	VP26A_HUMAN	Vacuolar protein sorting-associated protein 26A OS=Homo sapiens GN=VPS26A PE=1 SV=2	38.17	5
681	6.02	6.02	5.542	Q15018	F175B_HUMAN	BRISC complex subunit Abro1 OS=Homo sapiens GN=FAM175B PE=1 SV=2	46.901	3
682	6.01	6.43	16.67	P51665	PSD7_HUMAN	26S proteasome non-ATPase regulatory subunit 7 OS=Homo sapiens GN=PSMD7 PE=1 SV=2	37.025	4
683	6.01	6.29	9.127	Q16401	PSMD5_HUMAN	26S proteasome non-ATPase regulatory subunit 5 OS=Homo sapiens GN=PSMD5 PE=1 SV=3	56.196	4
684	6.01	6.16	19.09	O15143	ARC1B_HUMAN	Actin-related protein 2/3 complex subunit 1B OS=Homo sapiens GN=ARPC1B PE=1 SV=3	40.95	7
685	6.01	6.04	13.37	P11177	ODPB_HUMAN	Pyruvate dehydrogenase E1 component subunit beta, mitochondrial OS=Homo sapiens GN=PDHB PE=1 SV=3	39.233	3
686	6.01	6.04	13.23	P08574	CY1_HUMAN	Cytochrome c1, heme protein, mitochondrial OS=Homo sapiens GN=CYC1 PE=1 SV=3	35.422	3
687	6.01	6.01	37.31	P04632	CPNS1_HUMAN	Calpain small subunit 1 OS=Homo sapiens GN=CAPNS1 PE=1 SV=1	28.316	5
688	6	9.47	25.12	P51153	RAB13_HUMAN	Ras-related protein Rab-13 OS=Homo sapiens GN=RAB13 PE=1 SV=1	22.774	3
689	6	8.01	31.06	P15090	FABP4_HUMAN	Fatty acid-binding protein, adipocyte OS=Homo sapiens GN=FABP4 PE=1 SV=3	14.719	3
690	6	6.22	5.74	Q01813	K6PP_HUMAN	6-phosphofructokinase type C OS=Homo sapiens GN=PFKP PE=1 SV=2	85.596	3
691	6	6.07	18.87	P61019	RAB2A_HUMAN	Ras-related protein Rab-2A OS=Homo sapiens GN=RAB2A PE=1 SV=1	23.546	3
692	6	6.07	21.84	O43598	RCL_HUMAN	Deoxyribonucleoside 5'-monophosphate N-glycosidase OS=Homo sapiens GN=RCL PE=1 SV=1	19.108	3
693	6	6.06	20.8	P62851	RS25_HUMAN	40S ribosomal protein S25 OS=Homo sapiens GN=RPS25 PE=1 SV=1	13.742	3
694	6	6.05	11.33	P55263	ADK_HUMAN	Adenosine kinase OS=Homo sapiens GN=ADK PE=1 SV=2	40.545	3
695	6	6.04	4.048	Q14157	UBP2L_HUMAN	Ubiquitin-associated protein 2-like OS=Homo sapiens GN=UBAP2L PE=1 SV=2	114.535	3
696	6	6.02	9.61	P35613	BASI_HUMAN	Basigin OS=Homo sapiens GN=BSG PE=1 SV=2	42.2	3
697	6	6	19.15	P10768	ESTD_HUMAN	S-formylglutathione hydrolase OS=Homo sapiens GN=ESD PE=1 SV=2	31.463	3
698	6	6	41.07	Q15369	ELOC_HUMAN	Transcription elongation factor B polypeptide 1 OS=Homo sapiens GN=TCEB1 PE=1 SV=1	12.473	3
699	5.98	6.02	27.59	P07203	GPX1_HUMAN	Glutathione peroxidase 1 OS=Homo sapiens GN=GPX1 PE=1 SV=4	22.088	6
700	5.96	6.22	9.234	P12081	SYHC_HUMAN	Histidine--tRNA ligase, cytoplasmic OS=Homo sapiens GN=HARS PE=1 SV=2	57.411	5
701	5.96	6.11	18.09	P15880	RS2_HUMAN	40S ribosomal protein S2 OS=Homo sapiens GN=RPS2 PE=1 SV=2	31.324	5
702	5.93	5.94	21.53	P47985	UCRI_HUMAN	Cytochrome b-c1 complex subunit Rieske, mitochondrial OS=Homo sapiens GN=UQCRFS1 PE=1 SV=2	29.668	5
703	5.91	6.01	19.26	Q9NQ88	TIGAR_HUMAN	Fructose-2,6-bisphosphatase TIGAR OS=Homo sapiens GN=TIGAR PE=1 SV=1	30.063	5
704	5.9	5.97	10.42	Q13557	KCC2D_HUMAN	Calcium/calmodulin-dependent protein kinase type II subunit delta OS=Homo sapiens GN=CAMK2D PE=1 SV=3	56.369	5
705	5.88	5.9	38.83	O75964	ATP5L_HUMAN	ATP synthase subunit g, mitochondrial OS=Homo sapiens GN=ATP5L PE=1 SV=3	11.428	4
706	5.87	5.97	9.135	O43586	PPIP1_HUMAN	Proline-serine-threonine phosphatase-interacting protein 1 OS=Homo sapiens GN=PSTPIP1 PE=1 SV=1	47.591	4
707	5.86	6.09	11.47	Q8IZ83	A16A1_HUMAN	Aldehyde dehydrogenase family 16 member A1 OS=Homo sapiens GN=ALDH16A1 PE=1 SV=2	85.127	5
708	5.86	6.08	4.232	Q92973	TNPO1_HUMAN	Transportin-1 OS=Homo sapiens GN=TNPO1 PE=1 SV=2	102.355	3
709	5.86	5.96	16.31	P26440	IVD_HUMAN	Isovaleryl-CoA dehydrogenase, mitochondrial OS=Homo sapiens GN=IVD PE=1 SV=1	46.319	6
710	5.85	5.85	13.3	Q9UBQ5	EIF3K_HUMAN	Eukaryotic translation initiation factor 3 subunit K OS=Homo sapiens GN=EIF3K PE=1 SV=1	25.06	3
711	5.84	5.85	10.83	Q16740	CLPP_HUMAN	Putative ATP-dependent Clp protease proteolytic subunit, mitochondrial OS=Homo sapiens GN=CLPP PE=1 SV=1	30.18	3
712	5.82	5.83	56.76	Q96B49	TOM6_HUMAN	Mitochondrial import receptor subunit TOM6 homolog OS=Homo sapiens GN=TOMM6 PE=1 SV=1	8.002	4
713	5.79	5.86	33.77	O15511	ARPC5_HUMAN	Actin-related protein 2/3 complex subunit 5 OS=Homo sapiens GN=ARPC5 PE=1 SV=3	16.32	4
714	5.78	5.86	8.06	P13798	ACPH_HUMAN	Acylamino-acid-releasing enzyme OS=Homo sapiens GN=APEH PE=1 SV=4	81.225	5
715	5.75	5.93	15.82	Q04323	UBXN1_HUMAN	UBX domain-containing protein 1 OS=Homo sapiens GN=UBXN1 PE=1 SV=2	33.325	4
716	5.74	6.39	5.461	Q01433	AMPD2_HUMAN	AMP deaminase 2 OS=Homo sapiens GN=AMPD2 PE=1 SV=2	100.688	4
717	5.73	5.79	2.956	Q9HC35	EMAL4_HUMAN	Echinoderm microtubule-associated protein-like 4 OS=Homo sapiens GN=EML4 PE=1 SV=3	108.916	3
718	5.7	5.71	31	Q9BV40	VAMP8_HUMAN	Vesicle-associated membrane protein 8 OS=Homo sapiens GN=VAMP8 PE=1 SV=1	11.438	5
719	5.65	6.06	4.034	Q16512	PKN1_HUMAN	Serine/threonine-protein kinase N1 OS=Homo sapiens GN=PKN1 PE=1 SV=2	103.932	4
720	5.64	5.94	7.785	P33897	ABCD1_HUMAN	ATP-binding cassette sub-family D member 1 OS=Homo sapiens GN=ABCD1 PE=1 SV=2	82.937	4
721	5.6	5.63	23.81	P49773	HINT1_HUMAN	Histidine triad nucleotide-binding protein 1 OS=Homo sapiens GN=HINT1 PE=1 SV=2	13.802	4
722	5.54	5.62	12.59	P80217	IN35_HUMAN	Interferon-induced 35 kDa protein OS=Homo sapiens GN=IFI35 PE=1 SV=5	31.546	3
723	5.51	5.51	19.68	O75915	PRAF3_HUMAN	PRA1 family protein 3 OS=Homo sapiens GN=ARL6IP5 PE=1 SV=1	21.615	3
724	5.47	5.47	66.67	P56385	ATP5I_HUMAN	ATP synthase subunit e, mitochondrial OS=Homo sapiens GN=ATP5I PE=1 SV=2	7.933	6
725	5.44	5.84	4.826	P26640	SYVC_HUMAN	Valine--tRNA ligase OS=Homo sapiens GN=VARS PE=1 SV=4	140.476	5
726	5.43	5.46	16.6	Q8NHM4	TRY6_HUMAN	Putative trypsin-6 OS=Homo sapiens GN=TRY6 PE=5 SV=1	26.537	6
727	5.41	5.45	27.12	P18510	IL1RA_HUMAN	Interleukin-1 receptor antagonist protein OS=Homo sapiens GN=IL1RN PE=1 SV=1	20.055	4
728	5.37	5.37	31.3	P62888	RL30_HUMAN	60S ribosomal protein L30 OS=Homo sapiens GN=RPL30 PE=1 SV=2	12.784	3
729	5.36	5.45	16.88	Q9BRF8	CPPED_HUMAN	Calcineurin-like phosphoesterase domain-containing protein 1 OS=Homo sapiens GN=CPPED1 PE=1 SV=3	35.548	3
730	5.33	5.33	17.88	Q9H0E2	TOLIP_HUMAN	Toll-interacting protein OS=Homo sapiens GN=TOLLIP PE=1 SV=1	30.282	4
731	5.31	5.37	18.75	P32969	RL9_HUMAN	60S ribosomal protein L9 OS=Homo sapiens GN=RPL9 PE=1 SV=1	21.863	3
732	5.3	5.39	10.78	A0MZ66	SHOT1_HUMAN	Shootin-1 OS=Homo sapiens GN=KIAA1598 PE=1 SV=4	71.64	5
733	5.25	5.28	19.47	Q99685	MGLL_HUMAN	Monoglyceride lipase OS=Homo sapiens GN=MGLL PE=1 SV=2	33.261	4
734	5.25	5.28	6.726	O95544	NADK_HUMAN	NAD kinase OS=Homo sapiens GN=NADK PE=1 SV=1	49.228	3
735	5.18	5.2	4.728	Q13045	FLII_HUMAN	Protein flightless-1 homolog OS=Homo sapiens GN=FLII PE=1 SV=2	144.751	4
736	5.17	5.21	16.35	Q9HDC9	APMAP_HUMAN	Adipocyte plasma membrane-associated protein OS=Homo sapiens GN=APMAP PE=1 SV=2	46.48	4
737	5.16	5.2	17.35	P84098	RL19_HUMAN	60S ribosomal protein L19 OS=Homo sapiens GN=RPL19 PE=1 SV=1	23.466	4
738	5.12	5.3	3.067	O75533	SF3B1_HUMAN	Splicing factor 3B subunit 1 OS=Homo sapiens GN=SF3B1 PE=1 SV=3	145.83	3
739	5.11	5.13	20	P46783	RS10_HUMAN	40S ribosomal protein S10 OS=Homo sapiens GN=RPS10 PE=1 SV=1	18.898	4
740	5.1	5.66	5.27	Q9Y4W6	AFG32_HUMAN	AFG3-like protein 2 OS=Homo sapiens GN=AFG3L2 PE=1 SV=2	88.584	5
741	5.09	5.13	12.29	Q9BXS5	AP1M1_HUMAN	AP-1 complex subunit mu-1 OS=Homo sapiens GN=AP1M1 PE=1 SV=3	48.587	4
742	5.08	5.09	23.03	P05388	RLA0_HUMAN	60S acidic ribosomal protein P0 OS=Homo sapiens GN=RPLP0 PE=1 SV=1	34.274	6
743	5.02	5.16	13.96	O43865	SAHH2_HUMAN	Putative adenosylhomocysteinase 2 OS=Homo sapiens GN=AHCYL1 PE=1 SV=2	58.951	6
744	5.02	5.12	6.231	O00116	ADAS_HUMAN	Alkyldihydroxyacetonephosphate synthase, peroxisomal OS=Homo sapiens GN=AGPS PE=1 SV=1	72.912	3
745	4.97	5.12	11.21	Q9P2T1	GMPR2_HUMAN	GMP reductase 2 OS=Homo sapiens GN=GMPR2 PE=1 SV=1	37.874	4
746	4.96	4.99	8.034	Q9UH65	SWP70_HUMAN	Switch-associated protein 70 OS=Homo sapiens GN=SWAP70 PE=1 SV=1	68.998	5
747	4.95	5.17	19.1	Q9UJZ1	STML2_HUMAN	Stomatin-like protein 2 OS=Homo sapiens GN=STOML2 PE=1 SV=1	38.534	4
748	4.95	5.05	12.09	P67870	CSK2B_HUMAN	Casein kinase II subunit beta OS=Homo sapiens GN=CSNK2B PE=1 SV=1	24.942	2
749	4.92	4.92	34.75	Q15370	ELOB_HUMAN	Transcription elongation factor B polypeptide 2 OS=Homo sapiens GN=TCEB2 PE=1 SV=1	13.133	3
750	4.91	5.3	4.872	Q15276	RABE1_HUMAN	Rab GTPase-binding effector protein 1 OS=Homo sapiens GN=RABEP1 PE=1 SV=2	99.29	4
751	4.89	4.92	45.57	P24666	PPAC_HUMAN	Low molecular weight phosphotyrosine protein phosphatase OS=Homo sapiens GN=ACP1 PE=1 SV=3	18.042	5
752	4.88	5.03	5.773	Q9P107	GMIP_HUMAN	GEM-interacting protein OS=Homo sapiens GN=GMIP PE=1 SV=2	106.683	3
753	4.87	5.49	3.203	Q86VS8	HOOK3_HUMAN	Protein Hook homolog 3 OS=Homo sapiens GN=HOOK3 PE=1 SV=2	83.126	2
754	4.86	4.89	7.784	Q13263	TIF1B_HUMAN	Transcription intermediary factor 1-beta OS=Homo sapiens GN=TRIM28 PE=1 SV=5	88.55	3
755	4.86	4.89	30.22	Q15691	MARE1_HUMAN	Microtubule-associated protein RP/EB family member 1 OS=Homo sapiens GN=MAPRE1 PE=1 SV=3	29.999	4
756	4.85	4.92	9.244	P07384	CAN1_HUMAN	Calpain-1 catalytic subunit OS=Homo sapiens GN=CAPN1 PE=1 SV=1	81.89	6
757	4.84	4.91	42.19	P62987	RL40_HUMAN	Ubiquitin-60S ribosomal protein L40 OS=Homo sapiens GN=UBA52 PE=1 SV=2	14.728	5
758	4.83	5.02	23.27	O94903	PROSC_HUMAN	Proline synthase co-transcribed bacterial homolog protein OS=Homo sapiens GN=PROSC PE=1 SV=1	30.344	6
759	4.82	7.08	3.67	Q9Y4E8	UBP15_HUMAN	Ubiquitin carboxyl-terminal hydrolase 15 OS=Homo sapiens GN=USP15 PE=1 SV=3	112.419	3
760	4.8	4.8	42.54	P00167	CYB5_HUMAN	Cytochrome b5 OS=Homo sapiens GN=CYB5A PE=1 SV=2	15.33	4
761	4.79	81.1	61.8	P68133	ACTS_HUMAN	Actin, alpha skeletal muscle OS=Homo sapiens GN=ACTA1 PE=1 SV=1	42.051	4
762	4.79	4.79	10.44	Q16762	THTR_HUMAN	Thiosulfate sulfurtransferase OS=Homo sapiens GN=TST PE=1 SV=4	33.429	2
763	4.77	4.77	51.75	P05386	RLA1_HUMAN	60S acidic ribosomal protein P1 OS=Homo sapiens GN=RPLP1 PE=1 SV=1	11.514	3
764	4.75	4.92	5.204	Q6XQN6	PNCB_HUMAN	Nicotinate phosphoribosyltransferase OS=Homo sapiens GN=NAPRT1 PE=1 SV=2	57.578	2
765	4.75	4.81	17.56	P31937	3HIDH_HUMAN	3-hydroxyisobutyrate dehydrogenase, mitochondrial OS=Homo sapiens GN=HIBADH PE=1 SV=2	35.329	4
766	4.75	4.78	22.92	Q9P0J0	NDUAD_HUMAN	NADH dehydrogenase [ubiquinone] 1 alpha subcomplex subunit 13 OS=Homo sapiens GN=NDUFA13 PE=1 SV=3	16.698	3
767	4.74	7.07	12.59	Q9NVA2	SEP11_HUMAN	Septin-11 OS=Homo sapiens GN=SEPT11 PE=1 SV=3	49.398	4
768	4.74	4.97	1.453	P78527	PRKDC_HUMAN	DNA-dependent protein kinase catalytic subunit OS=Homo sapiens GN=PRKDC PE=1 SV=3	469.089	3
769	4.73	6.36	14.57	P00352	AL1A1_HUMAN	Retinal dehydrogenase 1 OS=Homo sapiens GN=ALDH1A1 PE=1 SV=2	54.862	5
770	4.73	4.92	7.522	O43615	TIM44_HUMAN	Mitochondrial import inner membrane translocase subunit TIM44 OS=Homo sapiens GN=TIMM44 PE=1 SV=2	51.356	3
771	4.71	4.86	5.381	Q5JTZ9	SYAM_HUMAN	Alanine--tRNA ligase, mitochondrial OS=Homo sapiens GN=AARS2 PE=1 SV=1	107.34	4
772	4.69	4.69	29.07	Q9UMX5	NENF_HUMAN	Neudesin OS=Homo sapiens GN=NENF PE=1 SV=1	18.856	5
773	4.68	5.01	19.62	Q13303	KCAB2_HUMAN	Voltage-gated potassium channel subunit beta-2 OS=Homo sapiens GN=KCNAB2 PE=1 SV=2	41	4
774	4.67	4.68	18.07	A6NDG6	PGP_HUMAN	Phosphoglycolate phosphatase OS=Homo sapiens GN=PGP PE=1 SV=1	34.006	3
775	4.66	4.79	15.94	Q9NQR4	NIT2_HUMAN	Omega-amidase NIT2 OS=Homo sapiens GN=NIT2 PE=1 SV=1	30.608	4
776	4.66	4.77	7.376	Q10567	AP1B1_HUMAN	AP-1 complex subunit beta-1 OS=Homo sapiens GN=AP1B1 PE=1 SV=2	104.637	5
777	4.64	4.75	3.852	Q9UJS0	CMC2_HUMAN	Calcium-binding mitochondrial carrier protein Aralar2 OS=Homo sapiens GN=SLC25A13 PE=1 SV=2	74.176	2
778	4.64	4.72	34.38	P60468	SC61B_HUMAN	Protein transport protein Sec61 subunit beta OS=Homo sapiens GN=SEC61B PE=1 SV=2	9.974	3
779	4.64	4.67	17.21	O60925	PFD1_HUMAN	Prefoldin subunit 1 OS=Homo sapiens GN=PFDN1 PE=1 SV=2	14.21	2
780	4.63	6.14	17.46	P43686	PRS6B_HUMAN	26S protease regulatory subunit 6B OS=Homo sapiens GN=PSMC4 PE=1 SV=2	47.366	3
781	4.62	4.72	32.24	P61225	RAP2B_HUMAN	Ras-related protein Rap-2b OS=Homo sapiens GN=RAP2B PE=1 SV=1	20.504	4
782	4.62	4.7	20.69	Q9UI09	NDUAC_HUMAN	NADH dehydrogenase [ubiquinone] 1 alpha subcomplex subunit 12 OS=Homo sapiens GN=NDUFA12 PE=1 SV=1	17.114	3
783	4.62	4.66	9.732	O00560	SDCB1_HUMAN	Syntenin-1 OS=Homo sapiens GN=SDCBP PE=1 SV=1	32.444	2
784	4.62	4.63	12.61	P04179	SODM_HUMAN	Superoxide dismutase [Mn], mitochondrial OS=Homo sapiens GN=SOD2 PE=1 SV=2	24.722	2
785	4.59	4.83	7.143	O15533	TPSN_HUMAN	Tapasin OS=Homo sapiens GN=TAPBP PE=1 SV=1	47.626	3
786	4.58	5.01	2.545	O95466	FMNL_HUMAN	Formin-like protein 1 OS=Homo sapiens GN=FMNL1 PE=1 SV=3	121.854	3
787	4.57	6.4	12.61	Q9BY43	CHM4A_HUMAN	Charged multivesicular body protein 4a OS=Homo sapiens GN=CHMP4A PE=1 SV=3	25.098	3
788	4.56	4.58	24.58	Q9Y6M9	NDUB9_HUMAN	NADH dehydrogenase [ubiquinone] 1 beta subcomplex subunit 9 OS=Homo sapiens GN=NDUFB9 PE=1 SV=3	21.831	3
789	4.55	4.68	4.545	P98171	RHG04_HUMAN	Rho GTPase-activating protein 4 OS=Homo sapiens GN=ARHGAP4 PE=1 SV=2	105.026	3
790	4.55	4.64	6.346	Q5JTV8	TOIP1_HUMAN	Torsin-1A-interacting protein 1 OS=Homo sapiens GN=TOR1AIP1 PE=1 SV=2	66.248	3
791	4.54	4.56	12.4	Q9UKY7	CDV3_HUMAN	Protein CDV3 homolog OS=Homo sapiens GN=CDV3 PE=1 SV=1	27.335	2
792	4.54	4.56	13.94	Q92688	AN32B_HUMAN	Acidic leucine-rich nuclear phosphoprotein 32 family member B OS=Homo sapiens GN=ANP32B PE=1 SV=1	28.788	3
793	4.54	4.54	18.69	P52815	RM12_HUMAN	39S ribosomal protein L12, mitochondrial OS=Homo sapiens GN=MRPL12 PE=1 SV=2	21.348	3
794	4.53	4.6	7.414	O75030	MITF_HUMAN	Microphthalmia-associated transcription factor OS=Homo sapiens GN=MITF PE=1 SV=2	58.795	3
795	4.53	4.53	14.95	Q03154	ACY1_HUMAN	Aminoacylase-1 OS=Homo sapiens GN=ACY1 PE=1 SV=1	45.885	4
796	4.52	4.54	8.126	Q07666	KHDR1_HUMAN	KH domain-containing, RNA-binding, signal transduction-associated protein 1 OS=Homo sapiens GN=KHDRBS1 PE=1 SV=1	48.227	3
797	4.51	4.53	9.244	Q00796	DHSO_HUMAN	Sorbitol dehydrogenase OS=Homo sapiens GN=SORD PE=1 SV=4	38.325	2
798	4.5	4.63	32.86	P62829	RL23_HUMAN	60S ribosomal protein L23 OS=Homo sapiens GN=RPL23 PE=1 SV=1	14.865	4
799	4.5	4.51	20.21	P17900	SAP3_HUMAN	Ganglioside GM2 activator OS=Homo sapiens GN=GM2A PE=1 SV=4	20.838	4
800	4.5	4.5	31.43	P10599	THIO_HUMAN	Thioredoxin OS=Homo sapiens GN=TXN PE=1 SV=3	11.737	4
801	4.47	4.7	8.041	P51648	AL3A2_HUMAN	Fatty aldehyde dehydrogenase OS=Homo sapiens GN=ALDH3A2 PE=1 SV=1	54.848	4
802	4.47	4.54	11.95	P27695	APEX1_HUMAN	DNA-(apurinic or apyrimidinic site) lyase OS=Homo sapiens GN=APEX1 PE=1 SV=2	35.555	3
803	4.45	4.52	15.04	P05362	ICAM1_HUMAN	Intercellular adhesion molecule 1 OS=Homo sapiens GN=ICAM1 PE=1 SV=2	57.825	6
804	4.44	4.54	7.888	P49589	SYCC_HUMAN	Cysteine--tRNA ligase, cytoplasmic OS=Homo sapiens GN=CARS PE=1 SV=3	85.473	6
805	4.43	6.49	16.06	P62753	RS6_HUMAN	40S ribosomal protein S6 OS=Homo sapiens GN=RPS6 PE=1 SV=1	28.681	2
806	4.43	4.61	9.962	P00390	GSHR_HUMAN	Glutathione reductase, mitochondrial OS=Homo sapiens GN=GSR PE=1 SV=2	56.257	4
807	4.43	4.56	12.2	Q16851	UGPA_HUMAN	UTP--glucose-1-phosphate uridylyltransferase OS=Homo sapiens GN=UGP2 PE=1 SV=5	56.94	6
808	4.42	4.46	5.525	Q00325	MPCP_HUMAN	Phosphate carrier protein, mitochondrial OS=Homo sapiens GN=SLC25A3 PE=1 SV=2	40.095	2
809	4.42	4.45	21.31	P09417	DHPR_HUMAN	Dihydropteridine reductase OS=Homo sapiens GN=QDPR PE=1 SV=2	25.79	4
810	4.41	4.57	6.413	P53041	PPP5_HUMAN	Serine/threonine-protein phosphatase 5 OS=Homo sapiens GN=PPP5C PE=1 SV=1	56.879	2
811	4.41	4.56	3.218	O14964	HGS_HUMAN	Hepatocyte growth factor-regulated tyrosine kinase substrate OS=Homo sapiens GN=HGS PE=1 SV=1	86.192	2
812	4.4	4.51	4.334	Q9NQW7	XPP1_HUMAN	Xaa-Pro aminopeptidase 1 OS=Homo sapiens GN=XPNPEP1 PE=1 SV=3	69.918	2
813	4.38	4.44	7.824	P54727	RD23B_HUMAN	UV excision repair protein RAD23 homolog B OS=Homo sapiens GN=RAD23B PE=1 SV=1	43.171	2
814	4.37	4.54	6.697	Q9H4G0	E41L1_HUMAN	Band 4.1-like protein 1 OS=Homo sapiens GN=EPB41L1 PE=1 SV=2	98.503	5
815	4.37	4.39	14.04	Q14165	MLEC_HUMAN	Malectin OS=Homo sapiens GN=MLEC PE=1 SV=1	32.234	3
816	4.36	4.39	11.73	Q9UBS4	DJB11_HUMAN	DnaJ homolog subfamily B member 11 OS=Homo sapiens GN=DNAJB11 PE=1 SV=1	40.514	3
817	4.35	4.49	14.8	P51570	GALK1_HUMAN	Galactokinase OS=Homo sapiens GN=GALK1 PE=1 SV=1	42.272	6
818	4.34	4.42	15.08	Q9UHQ9	NB5R1_HUMAN	NADH-cytochrome b5 reductase 1 OS=Homo sapiens GN=CYB5R1 PE=1 SV=1	34.095	5
819	4.34	4.41	21.89	P49721	PSB2_HUMAN	Proteasome subunit beta type-2 OS=Homo sapiens GN=PSMB2 PE=1 SV=1	22.836	3
820	4.34	4.35	17.45	P23919	KTHY_HUMAN	Thymidylate kinase OS=Homo sapiens GN=DTYMK PE=1 SV=4	23.819	3
821	4.32	4.34	12.89	P46781	RS9_HUMAN	40S ribosomal protein S9 OS=Homo sapiens GN=RPS9 PE=1 SV=3	22.591	4
822	4.31	4.31	16.85	P62913	RL11_HUMAN	60S ribosomal protein L11 OS=Homo sapiens GN=RPL11 PE=1 SV=2	20.252	3
823	4.28	4.48	4.163	Q92900	RENT1_HUMAN	Regulator of nonsense transcripts 1 OS=Homo sapiens GN=UPF1 PE=1 SV=2	124.345	3
824	4.26	9.45	30.07	P52907	CAZA1_HUMAN	F-actin-capping protein subunit alpha-1 OS=Homo sapiens GN=CAPZA1 PE=1 SV=3	32.923	4
825	4.25	4.26	11.89	P00403	COX2_HUMAN	Cytochrome c oxidase subunit 2 OS=Homo sapiens GN=MT-CO2 PE=1 SV=1	25.565	4
826	4.22	4.26	5.195	P49419	AL7A1_HUMAN	Alpha-aminoadipic semialdehyde dehydrogenase OS=Homo sapiens GN=ALDH7A1 PE=1 SV=5	58.487	2
827	4.22	4.22	9.39	Q9UQN3	CHM2B_HUMAN	Charged multivesicular body protein 2b OS=Homo sapiens GN=CHMP2B PE=1 SV=1	23.907	2
828	4.21	4.39	14.29	P00387	NB5R3_HUMAN	NADH-cytochrome b5 reductase 3 OS=Homo sapiens GN=CYB5R3 PE=1 SV=3	34.235	3
829	4.21	4.21	16.49	P61927	RL37_HUMAN	60S ribosomal protein L37 OS=Homo sapiens GN=RPL37 PE=1 SV=2	11.078	3
830	4.19	4.45	3.961	Q92619	HMHA1_HUMAN	Minor histocompatibility protein HA-1 OS=Homo sapiens GN=HMHA1 PE=1 SV=2	124.614	3
831	4.19	4.29	3.704	Q93050	VPP1_HUMAN	V-type proton ATPase 116 kDa subunit a isoform 1 OS=Homo sapiens GN=ATP6V0A1 PE=1 SV=3	96.413	2
832	4.19	4.25	11.04	O14579	COPE_HUMAN	Coatomer subunit epsilon OS=Homo sapiens GN=COPE PE=1 SV=3	34.482	4
833	4.19	4.19	30.1	P62805	H4_HUMAN	Histone H4 OS=Homo sapiens GN=HIST1H4A PE=1 SV=2	11.367	4
834	4.16	6.51	9.548	Q06124	PTN11_HUMAN	Tyrosine-protein phosphatase non-receptor type 11 OS=Homo sapiens GN=PTPN11 PE=1 SV=2	68.436	4
835	4.16	4.33	5.227	P46199	IF2M_HUMAN	Translation initiation factor IF-2, mitochondrial OS=Homo sapiens GN=MTIF2 PE=1 SV=2	81.317	3
836	4.16	4.3	8.136	Q9UGP4	LIMD1_HUMAN	LIM domain-containing protein 1 OS=Homo sapiens GN=LIMD1 PE=1 SV=1	72.19	3
837	4.16	4.24	6.934	O15371	EIF3D_HUMAN	Eukaryotic translation initiation factor 3 subunit D OS=Homo sapiens GN=EIF3D PE=1 SV=1	63.973	3
838	4.16	4.2	12.5	P53004	BIEA_HUMAN	Biliverdin reductase A OS=Homo sapiens GN=BLVRA PE=1 SV=2	33.428	3
839	4.16	4.19	9.901	Q9UNE7	CHIP_HUMAN	E3 ubiquitin-protein ligase CHIP OS=Homo sapiens GN=STUB1 PE=1 SV=2	34.856	3
840	4.16	4.19	5.911	P48426	PI42A_HUMAN	Phosphatidylinositol 5-phosphate 4-kinase type-2 alpha OS=Homo sapiens GN=PIP4K2A PE=1 SV=2	46.225	2
841	4.16	4.18	34.38	Q99878	H2A1J_HUMAN	Histone H2A type 1-J OS=Homo sapiens GN=HIST1H2AJ PE=1 SV=3	13.936	4
842	4.15	4.34	4.501	Q15155	NOMO1_HUMAN	Nodal modulator 1 OS=Homo sapiens GN=NOMO1 PE=1 SV=5	134.324	5
843	4.15	4.21	15.96	Q96AG4	LRC59_HUMAN	Leucine-rich repeat-containing protein 59 OS=Homo sapiens GN=LRRC59 PE=1 SV=1	34.93	5
844	4.15	4.21	13.27	Q99439	CNN2_HUMAN	Calponin-2 OS=Homo sapiens GN=CNN2 PE=1 SV=4	33.697	3
845	4.15	4.18	9.043	Q9HB07	MYG1_HUMAN	UPF0160 protein MYG1, mitochondrial OS=Homo sapiens GN=C12orf10 PE=1 SV=2	42.449	3
846	4.15	4.16	18.5	Q969H8	CS010_HUMAN	UPF0556 protein C19orf10 OS=Homo sapiens GN=C19orf10 PE=1 SV=1	18.795	3
847	4.14	4.54	2.176	O15031	PLXB2_HUMAN	Plexin-B2 OS=Homo sapiens GN=PLXNB2 PE=1 SV=3	205.127	3
848	4.14	4.3	21.7	Q9UII2	ATIF1_HUMAN	ATPase inhibitor, mitochondrial OS=Homo sapiens GN=ATPIF1 PE=1 SV=1	12.249	2
849	4.13	16.6	20.13	P31150	GDIA_HUMAN	Rab GDP dissociation inhibitor alpha OS=Homo sapiens GN=GDI1 PE=1 SV=2	50.583	2
850	4.13	4.21	5.556	Q13217	DNJC3_HUMAN	DnaJ homolog subfamily C member 3 OS=Homo sapiens GN=DNAJC3 PE=1 SV=1	57.58	3
851	4.12	4.21	12.89	Q13636	RAB31_HUMAN	Ras-related protein Rab-31 OS=Homo sapiens GN=RAB31 PE=1 SV=1	21.569	2
852	4.12	4.19	4.098	P00488	F13A_HUMAN	Coagulation factor XIII A chain OS=Homo sapiens GN=F13A1 PE=1 SV=4	83.267	3
853	4.11	4.29	9.538	P13686	PPA5_HUMAN	Tartrate-resistant acid phosphatase type 5 OS=Homo sapiens GN=ACP5 PE=1 SV=3	36.599	2
854	4.11	4.17	3.787	P15498	VAV_HUMAN	Proto-oncogene vav OS=Homo sapiens GN=VAV1 PE=1 SV=4	98.314	2
855	4.1	4.42	12.77	Q9BVK6	TMED9_HUMAN	Transmembrane emp24 domain-containing protein 9 OS=Homo sapiens GN=TMED9 PE=1 SV=2	27.277	3
856	4.1	4.18	3.317	P55884	EIF3B_HUMAN	Eukaryotic translation initiation factor 3 subunit B OS=Homo sapiens GN=EIF3B PE=1 SV=3	92.482	3
857	4.1	4.16	3.183	Q15046	SYK_HUMAN	Lysine--tRNA ligase OS=Homo sapiens GN=KARS PE=1 SV=3	68.048	2
858	4.1	4.1	4.956	Q9UBW5	BIN2_HUMAN	Bridging integrator 2 OS=Homo sapiens GN=BIN2 PE=1 SV=3	61.874	3
859	4.09	4.36	1.741	Q9Y3R5	DOP2_HUMAN	Protein dopey-2 OS=Homo sapiens GN=DOPEY2 PE=1 SV=5	258.23	3
860	4.09	4.35	1.35	Q14789	GOGB1_HUMAN	Golgin subfamily B member 1 OS=Homo sapiens GN=GOLGB1 PE=1 SV=2	376.019	3
861	4.09	4.09	5.357	P61011	SRP54_HUMAN	Signal recognition particle 54 kDa protein OS=Homo sapiens GN=SRP54 PE=1 SV=1	55.705	2
862	4.08	4.2	7.925	Q8NBX0	SCPDL_HUMAN	Saccharopine dehydrogenase-like oxidoreductase OS=Homo sapiens GN=SCCPDH PE=1 SV=1	47.151	3
863	4.08	4.19	0.823	Q7Z6Z7	HUWE1_HUMAN	E3 ubiquitin-protein ligase HUWE1 OS=Homo sapiens GN=HUWE1 PE=1 SV=3	481.891	2
864	4.08	4.17	3.014	Q9Y262	EIF3L_HUMAN	Eukaryotic translation initiation factor 3 subunit L OS=Homo sapiens GN=EIF3L PE=1 SV=1	66.727	2
865	4.08	4.16	3.689	Q14161	GIT2_HUMAN	ARF GTPase-activating protein GIT2 OS=Homo sapiens GN=GIT2 PE=1 SV=2	84.543	2
866	4.08	4.15	4.009	Q3SY69	AL1L2_HUMAN	Mitochondrial 10-formyltetrahydrofolate dehydrogenase OS=Homo sapiens GN=ALDH1L2 PE=1 SV=2	101.746	2
867	4.08	4.14	3.759	O75534	CSDE1_HUMAN	Cold shock domain-containing protein E1 OS=Homo sapiens GN=CSDE1 PE=1 SV=2	88.885	3
868	4.08	4.12	11.59	Q9BVG4	CX026_HUMAN	UPF0368 protein Cxorf26 OS=Homo sapiens GN=CXorf26 PE=1 SV=1	26.057	2
869	4.08	4.11	12.37	Q9NVJ2	ARL8B_HUMAN	ADP-ribosylation factor-like protein 8B OS=Homo sapiens GN=ARL8B PE=1 SV=1	21.539	2
870	4.08	4.09	13.04	P55735	SEC13_HUMAN	Protein SEC13 homolog OS=Homo sapiens GN=SEC13 PE=1 SV=3	35.541	3
871	4.07	4.26	6.064	Q3KQU3	MA7D1_HUMAN	MAP7 domain-containing protein 1 OS=Homo sapiens GN=MAP7D1 PE=1 SV=1	92.82	4
872	4.07	4.09	5.102	Q9Y383	LC7L2_HUMAN	Putative RNA-binding protein Luc7-like 2 OS=Homo sapiens GN=LUC7L2 PE=1 SV=2	46.514	2
873	4.07	4.08	3.657	O75400	PR40A_HUMAN	Pre-mRNA-processing factor 40 homolog A OS=Homo sapiens GN=PRPF40A PE=1 SV=2	108.805	3
874	4.06	4.33	8	Q8NCE2	MTMRE_HUMAN	Myotubularin-related protein 14 OS=Homo sapiens GN=MTMR14 PE=1 SV=2	72.203	2
875	4.06	4.21	1.013	Q709C8	VP13C_HUMAN	Vacuolar protein sorting-associated protein 13C OS=Homo sapiens GN=VPS13C PE=1 SV=1	422.39	2
876	4.06	4.15	19.37	P05198	IF2A_HUMAN	Eukaryotic translation initiation factor 2 subunit 1 OS=Homo sapiens GN=EIF2S1 PE=1 SV=3	36.112	4
877	4.06	4.12	16.34	Q9BPX5	ARP5L_HUMAN	Actin-related protein 2/3 complex subunit 5-like protein OS=Homo sapiens GN=ARPC5L PE=1 SV=1	16.941	2
878	4.06	4.11	40.14	O60234	GMFG_HUMAN	Glia maturation factor gamma OS=Homo sapiens GN=GMFG PE=1 SV=1	16.801	3
879	4.06	4.07	22.41	Q16718	NDUA5_HUMAN	NADH dehydrogenase [ubiquinone] 1 alpha subcomplex subunit 5 OS=Homo sapiens GN=NDUFA5 PE=1 SV=3	13.459	2
880	4.05	4.51	3.125	Q9BYX2	TBD2A_HUMAN	TBC1 domain family member 2A OS=Homo sapiens GN=TBC1D2 PE=1 SV=3	105.414	3
881	4.05	4.38	2.196	Q08379	GOGA2_HUMAN	Golgin subfamily A member 2 OS=Homo sapiens GN=GOLGA2 PE=1 SV=3	113.086	2
882	4.05	4.28	5.957	Q96TC7	RMD3_HUMAN	Regulator of microtubule dynamics protein 3 OS=Homo sapiens GN=FAM82A2 PE=1 SV=2	52.118	2
883	4.05	4.22	2.812	O60313	OPA1_HUMAN	Dynamin-like 120 kDa protein, mitochondrial OS=Homo sapiens GN=OPA1 PE=1 SV=3	111.631	2
884	4.05	4.13	5.512	P43405	KSYK_HUMAN	Tyrosine-protein kinase SYK OS=Homo sapiens GN=SYK PE=1 SV=1	72.066	2
885	4.05	4.1	9.888	Q96CS3	FAF2_HUMAN	FAS-associated factor 2 OS=Homo sapiens GN=FAF2 PE=1 SV=2	52.623	3
886	4.05	4.09	21.69	P02654	APOC1_HUMAN	Apolipoprotein C-I OS=Homo sapiens GN=APOC1 PE=1 SV=1	9.332	2
887	4.05	4.08	1.766	P11717	MPRI_HUMAN	Cation-independent mannose-6-phosphate receptor OS=Homo sapiens GN=IGF2R PE=1 SV=3	274.375	4
888	4.05	4.08	11.07	Q5UCC4	EMC10_HUMAN	ER membrane protein complex subunit 10 OS=Homo sapiens GN=EMC10 PE=1 SV=1	27.347	2
889	4.05	4.08	10.78	P50897	PPT1_HUMAN	Palmitoyl-protein thioesterase 1 OS=Homo sapiens GN=PPT1 PE=1 SV=1	34.193	2
890	4.05	4.06	7.511	Q00013	EM55_HUMAN	55 kDa erythrocyte membrane protein OS=Homo sapiens GN=MPP1 PE=1 SV=2	52.296	3
891	4.05	4.06	21.71	O95168	NDUB4_HUMAN	NADH dehydrogenase [ubiquinone] 1 beta subcomplex subunit 4 OS=Homo sapiens GN=NDUFB4 PE=1 SV=3	15.209	2
892	4.04	4.14	24.76	P99999	CYC_HUMAN	Cytochrome c OS=Homo sapiens GN=CYCS PE=1 SV=2	11.749	3
893	4.04	4.13	10.3	P23193	TCEA1_HUMAN	Transcription elongation factor A protein 1 OS=Homo sapiens GN=TCEA1 PE=1 SV=2	33.97	3
894	4.04	4.12	4.629	Q5JRX3	PREP_HUMAN	Presequence protease, mitochondrial OS=Homo sapiens GN=PITRM1 PE=1 SV=2	117.413	3
895	4.04	4.12	3.356	Q96AX1	VP33A_HUMAN	Vacuolar protein sorting-associated protein 33A OS=Homo sapiens GN=VPS33A PE=1 SV=1	67.611	2
896	4.04	4.12	12.39	Q15005	SPCS2_HUMAN	Signal peptidase complex subunit 2 OS=Homo sapiens GN=SPCS2 PE=1 SV=3	25.003	2
897	4.04	4.09	6.048	O75306	NDUS2_HUMAN	NADH dehydrogenase [ubiquinone] iron-sulfur protein 2, mitochondrial OS=Homo sapiens GN=NDUFS2 PE=1 SV=2	52.546	3
898	4.04	4.07	4.941	Q92844	TANK_HUMAN	TRAF family member-associated NF-kappa-B activator OS=Homo sapiens GN=TANK PE=1 SV=2	47.816	2
899	4.04	4.06	12.99	Q15293	RCN1_HUMAN	Reticulocalbin-1 OS=Homo sapiens GN=RCN1 PE=1 SV=1	38.89	3
900	4.04	4.06	19.05	P55008	AIF1_HUMAN	Allograft inflammatory factor 1 OS=Homo sapiens GN=AIF1 PE=1 SV=1	16.703	3
901	4.04	4.05	14.74	P62750	RL23A_HUMAN	60S ribosomal protein L23a OS=Homo sapiens GN=RPL23A PE=1 SV=1	17.695	2
902	4.04	4.04	4.878	O43237	DC1L2_HUMAN	Cytoplasmic dynein 1 light intermediate chain 2 OS=Homo sapiens GN=DYNC1LI2 PE=1 SV=1	54.099	2
903	4.03	4.31	2.479	P20701	ITAL_HUMAN	Integrin alpha-L OS=Homo sapiens GN=ITGAL PE=1 SV=3	128.77	2
904	4.03	4.29	3.713	Q03518	TAP1_HUMAN	Antigen peptide transporter 1 OS=Homo sapiens GN=TAP1 PE=1 SV=2	87.218	2
905	4.03	4.19	4.389	P11216	PYGB_HUMAN	Glycogen phosphorylase, brain form OS=Homo sapiens GN=PYGB PE=1 SV=5	96.696	3
906	4.03	4.18	13.91	P15374	UCHL3_HUMAN	Ubiquitin carboxyl-terminal hydrolase isozyme L3 OS=Homo sapiens GN=UCHL3 PE=1 SV=1	26.183	3
907	4.03	4.17	4.478	O43491	E41L2_HUMAN	Band 4.1-like protein 2 OS=Homo sapiens GN=EPB41L2 PE=1 SV=1	112.588	3
908	4.03	4.11	6.918	Q9Y315	DEOC_HUMAN	Putative deoxyribose-phosphate aldolase OS=Homo sapiens GN=DERA PE=1 SV=2	35.231	2
909	4.03	4.07	4.787	Q2M2I8	AAK1_HUMAN	AP2-associated protein kinase 1 OS=Homo sapiens GN=AAK1 PE=1 SV=3	103.885	3
910	4.03	4.06	4.386	Q14694	UBP10_HUMAN	Ubiquitin carboxyl-terminal hydrolase 10 OS=Homo sapiens GN=USP10 PE=1 SV=2	87.134	2
911	4.03	4.06	7.485	Q9NZL9	MAT2B_HUMAN	Methionine adenosyltransferase 2 subunit beta OS=Homo sapiens GN=MAT2B PE=1 SV=1	37.552	2
912	4.03	4.06	8.304	P46926	GNPI1_HUMAN	Glucosamine-6-phosphate isomerase 1 OS=Homo sapiens GN=GNPDA1 PE=1 SV=1	32.669	2
913	4.03	4.04	25.76	P25398	RS12_HUMAN	40S ribosomal protein S12 OS=Homo sapiens GN=RPS12 PE=1 SV=3	14.515	3
914	4.02	39.42	60.45	Q13885	TBB2A_HUMAN	Tubulin beta-2A chain OS=Homo sapiens GN=TUBB2A PE=1 SV=1	49.907	3
915	4.02	4.14	6.25	Q8NBS9	TXND5_HUMAN	Thioredoxin domain-containing protein 5 OS=Homo sapiens GN=TXNDC5 PE=1 SV=2	47.629	3
916	4.02	4.12	12.23	P68402	PA1B2_HUMAN	Platelet-activating factor acetylhydrolase IB subunit beta OS=Homo sapiens GN=PAFAH1B2 PE=1 SV=1	25.569	2
917	4.02	4.11	2.385	P46379	BAG6_HUMAN	Large proline-rich protein BAG6 OS=Homo sapiens GN=BAG6 PE=1 SV=2	119.409	2
918	4.02	4.11	22.37	P49755	TMEDA_HUMAN	Transmembrane emp24 domain-containing protein 10 OS=Homo sapiens GN=TMED10 PE=1 SV=2	24.976	4
919	4.02	4.07	3.645	Q567U6	CCD93_HUMAN	Coiled-coil domain-containing protein 93 OS=Homo sapiens GN=CCDC93 PE=1 SV=2	73.198	2
920	4.02	4.06	30.92	P61088	UBE2N_HUMAN	Ubiquitin-conjugating enzyme E2 N OS=Homo sapiens GN=UBE2N PE=1 SV=1	17.138	5
921	4.02	4.06	27.71	P14406	CX7A2_HUMAN	Cytochrome c oxidase subunit 7A2, mitochondrial OS=Homo sapiens GN=COX7A2 PE=1 SV=1	9.396	2
922	4.02	4.02	7.283	O00303	EIF3F_HUMAN	Eukaryotic translation initiation factor 3 subunit F OS=Homo sapiens GN=EIF3F PE=1 SV=1	37.564	2
923	4.02	4.02	6.857	P46976	GLYG_HUMAN	Glycogenin-1 OS=Homo sapiens GN=GYG1 PE=1 SV=4	39.384	2
924	4.02	4.02	25.35	Q9NS69	TOM22_HUMAN	Mitochondrial import receptor subunit TOM22 homolog OS=Homo sapiens GN=TOMM22 PE=1 SV=3	15.522	2
925	4.02	4.02	17.46	Q99880	H2B1L_HUMAN	Histone H2B type 1-L OS=Homo sapiens GN=HIST1H2BL PE=1 SV=3	13.952	2
926	4.01	6.44	23.28	P01111	RASN_HUMAN	GTPase NRas OS=Homo sapiens GN=NRAS PE=1 SV=1	21.229	3
927	4.01	4.18	6.443	P30533	AMRP_HUMAN	Alpha-2-macroglobulin receptor-associated protein OS=Homo sapiens GN=LRPAP1 PE=1 SV=1	41.466	2
928	4.01	4.14	14.24	P13716	HEM2_HUMAN	Delta-aminolevulinic acid dehydratase OS=Homo sapiens GN=ALAD PE=1 SV=1	36.295	2
929	4.01	4.1	3.249	P49959	MRE11_HUMAN	Double-strand break repair protein MRE11A OS=Homo sapiens GN=MRE11A PE=1 SV=3	80.593	2
930	4.01	4.09	5.037	P04062	GLCM_HUMAN	Glucosylceramidase OS=Homo sapiens GN=GBA PE=1 SV=3	59.716	2
931	4.01	4.08	30.28	P60983	GMFB_HUMAN	Glia maturation factor beta OS=Homo sapiens GN=GMFB PE=1 SV=2	16.713	2
932	4.01	4.07	2.941	O14672	ADA10_HUMAN	Disintegrin and metalloproteinase domain-containing protein 10 OS=Homo sapiens GN=ADAM10 PE=1 SV=1	84.142	2
933	4.01	4.06	3.239	Q99615	DNJC7_HUMAN	DnaJ homolog subfamily C member 7 OS=Homo sapiens GN=DNAJC7 PE=1 SV=2	56.441	2
934	4.01	4.06	9.865	O15173	PGRC2_HUMAN	Membrane-associated progesterone receptor component 2 OS=Homo sapiens GN=PGRMC2 PE=1 SV=1	23.818	2
935	4.01	4.06	3.666	P43490	NAMPT_HUMAN	Nicotinamide phosphoribosyltransferase OS=Homo sapiens GN=NAMPT PE=1 SV=1	55.521	2
936	4.01	4.05	21.57	P62310	LSM3_HUMAN	U6 snRNA-associated Sm-like protein LSm3 OS=Homo sapiens GN=LSM3 PE=1 SV=2	11.845	3
937	4.01	4.04	11.96	Q99627	CSN8_HUMAN	COP9 signalosome complex subunit 8 OS=Homo sapiens GN=COPS8 PE=1 SV=1	23.226	2
938	4.01	4.02	13.16	P15428	PGDH_HUMAN	15-hydroxyprostaglandin dehydrogenase [NAD(+)] OS=Homo sapiens GN=HPGD PE=1 SV=1	28.977	3
939	4.01	4.02	16.67	Q8TF09	DLRB2_HUMAN	Dynein light chain roadblock-type 2 OS=Homo sapiens GN=DYNLRB2 PE=1 SV=1	10.855	2
939	0	4.02	16.67	Q9NP97	DLRB1_HUMAN	Dynein light chain roadblock-type 1 OS=Homo sapiens GN=DYNLRB1 PE=1 SV=3	10.922	2
940	4	30.89	43.46	Q71U36	TBA1A_HUMAN	Tubulin alpha-1A chain OS=Homo sapiens GN=TUBA1A PE=1 SV=1	50.136	2
941	4	12.1	12.05	P17844	DDX5_HUMAN	Probable ATP-dependent RNA helicase DDX5 OS=Homo sapiens GN=DDX5 PE=1 SV=1	69.148	3
942	4	10.93	39.07	P20339	RAB5A_HUMAN	Ras-related protein Rab-5A OS=Homo sapiens GN=RAB5A PE=1 SV=2	23.659	2
943	4	7.89	25.45	P60981	DEST_HUMAN	Destrin OS=Homo sapiens GN=DSTN PE=1 SV=3	18.506	2
944	4	6.07	10.13	Q99733	NP1L4_HUMAN	Nucleosome assembly protein 1-like 4 OS=Homo sapiens GN=NAP1L4 PE=1 SV=1	42.823	2
945	4	4.93	12.93	Q14257	RCN2_HUMAN	Reticulocalbin-2 OS=Homo sapiens GN=RCN2 PE=1 SV=1	36.876	2
946	4	4.16	3.06	Q9H845	ACAD9_HUMAN	Acyl-CoA dehydrogenase family member 9, mitochondrial OS=Homo sapiens GN=ACAD9 PE=1 SV=1	68.76	2
947	4	4.13	3.59	Q05209	PTN12_HUMAN	Tyrosine-protein phosphatase non-receptor type 12 OS=Homo sapiens GN=PTPN12 PE=1 SV=3	88.106	2
948	4	4.11	7.242	P50148	GNAQ_HUMAN	Guanine nucleotide-binding protein G(q) subunit alpha OS=Homo sapiens GN=GNAQ PE=1 SV=4	42.142	2
949	4	4.11	7.123	P17612	KAPCA_HUMAN	cAMP-dependent protein kinase catalytic subunit alpha OS=Homo sapiens GN=PRKACA PE=1 SV=2	40.59	2
950	4	4.08	7.071	Q15006	EMC2_HUMAN	ER membrane protein complex subunit 2 OS=Homo sapiens GN=EMC2 PE=1 SV=1	34.834	2
951	4	4.08	9.326	Q14116	IL18_HUMAN	Interleukin-18 OS=Homo sapiens GN=IL18 PE=1 SV=1	22.326	2
952	4	4.06	14.54	P42768	WASP_HUMAN	Wiskott-Aldrich syndrome protein OS=Homo sapiens GN=WAS PE=1 SV=4	52.913	3
953	4	4.05	25	P62942	FKB1A_HUMAN	Peptidyl-prolyl cis-trans isomerase FKBP1A OS=Homo sapiens GN=FKBP1A PE=1 SV=2	11.951	2
954	4	4.05	25.53	P56134	ATPK_HUMAN	ATP synthase subunit f, mitochondrial OS=Homo sapiens GN=ATP5J2 PE=1 SV=3	10.918	2
955	4	4.04	3.875	O95394	AGM1_HUMAN	Phosphoacetylglucosamine mutase OS=Homo sapiens GN=PGM3 PE=1 SV=1	59.852	2
956	4	4.04	21.88	O60783	RT14_HUMAN	28S ribosomal protein S14, mitochondrial OS=Homo sapiens GN=MRPS14 PE=1 SV=1	15.139	2
957	4	4.04	7.958	Q15181	IPYR_HUMAN	Inorganic pyrophosphatase OS=Homo sapiens GN=PPA1 PE=1 SV=2	32.66	2
958	4	4.04	23.08	P61457	PHS_HUMAN	Pterin-4-alpha-carbinolamine dehydratase OS=Homo sapiens GN=PCBD1 PE=1 SV=2	12	2
959	4	4.04	21.66	P56377	AP1S2_HUMAN	AP-1 complex subunit sigma-2 OS=Homo sapiens GN=AP1S2 PE=1 SV=1	18.615	3
960	4	4.03	25.66	O43914	TYOBP_HUMAN	TYRO protein tyrosine kinase-binding protein OS=Homo sapiens GN=TYROBP PE=1 SV=1	12.179	2
961	4	4.02	4.601	Q13492	PICAL_HUMAN	Phosphatidylinositol-binding clathrin assembly protein OS=Homo sapiens GN=PICALM PE=1 SV=2	70.755	2
962	4	4.02	4.805	P20042	IF2B_HUMAN	Eukaryotic translation initiation factor 2 subunit 2 OS=Homo sapiens GN=EIF2S2 PE=1 SV=2	38.388	2
963	4	4.02	9.963	Q8IY95	TM192_HUMAN	Transmembrane protein 192 OS=Homo sapiens GN=TMEM192 PE=1 SV=1	30.922	2
964	4	4.02	8.276	Q01105	SET_HUMAN	Protein SET OS=Homo sapiens GN=SET PE=1 SV=3	33.489	2
965	4	4.01	8.251	P05026	AT1B1_HUMAN	Sodium/potassium-transporting ATPase subunit beta-1 OS=Homo sapiens GN=ATP1B1 PE=1 SV=1	35.061	2
966	4	4.01	22.33	P82909	RT36_HUMAN	28S ribosomal protein S36, mitochondrial OS=Homo sapiens GN=MRPS36 PE=1 SV=2	11.466	2
967	4	4	4.252	Q3YEC7	RBEL1_HUMAN	Rab-like protein 1 OS=Homo sapiens GN=PARF PE=1 SV=2	79.549	2
968	4	4	16.88	Q9H4G4	GAPR1_HUMAN	Golgi-associated plant pathogenesis-related protein 1 OS=Homo sapiens GN=GLIPR2 PE=1 SV=3	17.218	2
969	4	4	17	Q15836	VAMP3_HUMAN	Vesicle-associated membrane protein 3 OS=Homo sapiens GN=VAMP3 PE=1 SV=3	11.309	2
970	4	4	29.07	Q9H3K6	BOLA2_HUMAN	BolA-like protein 2 OS=Homo sapiens GN=BOLA2 PE=1 SV=1	10.117	2
971	3.97	6.39	20.59	Q16629	SRSF7_HUMAN	Serine/arginine-rich splicing factor 7 OS=Homo sapiens GN=SRSF7 PE=1 SV=1	27.367	3
972	3.96	4.12	17.29	O15116	LSM1_HUMAN	U6 snRNA-associated Sm-like protein LSm1 OS=Homo sapiens GN=LSM1 PE=1 SV=1	15.179	2
973	3.95	4.14	10.06	Q9UBQ7	GRHPR_HUMAN	Glyoxylate reductase/hydroxypyruvate reductase OS=Homo sapiens GN=GRHPR PE=1 SV=1	35.668	3
974	3.95	4.1	4.697	Q15067	ACOX1_HUMAN	Peroxisomal acyl-coenzyme A oxidase 1 OS=Homo sapiens GN=ACOX1 PE=1 SV=3	74.424	2
975	3.93	3.95	31.93	P60866	RS20_HUMAN	40S ribosomal protein S20 OS=Homo sapiens GN=RPS20 PE=1 SV=1	13.373	4
976	3.92	4.12	2.807	Q9Y5Y6	ST14_HUMAN	Suppressor of tumorigenicity 14 protein OS=Homo sapiens GN=ST14 PE=1 SV=2	94.77	2
977	3.89	3.89	14.4	Q9GZY6	NTAL_HUMAN	Linker for activation of T-cells family member 2 OS=Homo sapiens GN=LAT2 PE=1 SV=1	26.55	2
978	3.85	4.24	6.1	Q15758	AAAT_HUMAN	Neutral amino acid transporter B(0) OS=Homo sapiens GN=SLC1A5 PE=1 SV=2	56.598	2
979	3.83	3.86	6.452	Q96PU8	QKI_HUMAN	Protein quaking OS=Homo sapiens GN=QKI PE=1 SV=1	37.671	2
980	3.82	4.28	11.05	Q9H4M9	EHD1_HUMAN	EH domain-containing protein 1 OS=Homo sapiens GN=EHD1 PE=1 SV=2	60.627	4
981	3.8	8.89	24.65	P61020	RAB5B_HUMAN	Ras-related protein Rab-5B OS=Homo sapiens GN=RAB5B PE=1 SV=1	23.707	2
982	3.8	7.14	12.43	P08754	GNAI3_HUMAN	Guanine nucleotide-binding protein G(k) subunit alpha OS=Homo sapiens GN=GNAI3 PE=1 SV=3	40.532	2
983	3.78	3.83	8.659	O14745	NHRF1_HUMAN	Na(+)/H(+) exchange regulatory cofactor NHE-RF1 OS=Homo sapiens GN=SLC9A3R1 PE=1 SV=4	38.868	2
984	3.76	3.96	1.685	Q92616	GCN1L_HUMAN	Translational activator GCN1 OS=Homo sapiens GN=GCN1L1 PE=1 SV=6	292.758	3
985	3.73	4.34	18.09	P35030	TRY3_HUMAN	Trypsin-3 OS=Homo sapiens GN=PRSS3 PE=1 SV=2	32.529	4
986	3.68	3.8	5.695	Q9Y305	ACOT9_HUMAN	Acyl-coenzyme A thioesterase 9, mitochondrial OS=Homo sapiens GN=ACOT9 PE=1 SV=2	49.902	2
987	3.68	3.74	14.56	Q9NP72	RAB18_HUMAN	Ras-related protein Rab-18 OS=Homo sapiens GN=RAB18 PE=1 SV=1	22.977	3
988	3.62	3.71	3.328	Q13136	LIPA1_HUMAN	Liprin-alpha-1 OS=Homo sapiens GN=PPFIA1 PE=1 SV=1	135.779	3
989	3.62	3.71	19.76	Q9Y696	CLIC4_HUMAN	Chloride intracellular channel protein 4 OS=Homo sapiens GN=CLIC4 PE=1 SV=4	28.772	3
990	3.61	3.73	3.992	Q9HD40	SPCS_HUMAN	O-phosphoseryl-tRNA(Sec) selenium transferase OS=Homo sapiens GN=SEPSECS PE=1 SV=2	55.726	2
991	3.6	3.64	6.009	P04066	FUCO_HUMAN	Tissue alpha-L-fucosidase OS=Homo sapiens GN=FUCA1 PE=1 SV=4	53.689	2
992	3.56	3.64	10.56	Q9BPW8	NIPS1_HUMAN	Protein NipSnap homolog 1 OS=Homo sapiens GN=NIPSNAP1 PE=1 SV=1	33.31	3
993	3.55	3.62	8.883	P21695	GPDA_HUMAN	Glycerol-3-phosphate dehydrogenase [NAD(+)], cytoplasmic OS=Homo sapiens GN=GPD1 PE=1 SV=4	37.568	3
994	3.51	3.82	7.555	P05165	PCCA_HUMAN	Propionyl-CoA carboxylase alpha chain, mitochondrial OS=Homo sapiens GN=PCCA PE=1 SV=4	80.059	5
995	3.51	3.69	5.59	P26196	DDX6_HUMAN	Probable ATP-dependent RNA helicase DDX6 OS=Homo sapiens GN=DDX6 PE=1 SV=2	54.417	2
996	3.5	3.6	6.509	Q05655	KPCD_HUMAN	Protein kinase C delta type OS=Homo sapiens GN=PRKCD PE=1 SV=2	77.505	4
997	3.5	3.6	11.95	O43837	IDH3B_HUMAN	Isocitrate dehydrogenase [NAD] subunit beta, mitochondrial OS=Homo sapiens GN=IDH3B PE=1 SV=2	42.184	4
998	3.49	3.79	4.854	O14874	BCKD_HUMAN	[3-methyl-2-oxobutanoate dehydrogenase [lipoamide]] kinase, mitochondrial OS=Homo sapiens GN=BCKDK PE=1 SV=2	46.36	2
999	3.48	16.41	34.9	P12236	ADT3_HUMAN	ADP/ATP translocase 3 OS=Homo sapiens GN=SLC25A6 PE=1 SV=4	32.866	2
1000	3.48	3.55	3.885	P32455	GBP1_HUMAN	Interferon-induced guanylate-binding protein 1 OS=Homo sapiens GN=GBP1 PE=1 SV=2	67.931	2
1001	3.48	3.54	14.41	O43633	CHM2A_HUMAN	Charged multivesicular body protein 2a OS=Homo sapiens GN=CHMP2A PE=1 SV=1	25.104	3
1002	3.46	3.53	4.378	Q53EU6	GPAT3_HUMAN	Glycerol-3-phosphate acyltransferase 3 OS=Homo sapiens GN=AGPAT9 PE=1 SV=2	48.705	2
1003	3.46	3.51	7.046	O60568	PLOD3_HUMAN	Procollagen-lysine,2-oxoglutarate 5-dioxygenase 3 OS=Homo sapiens GN=PLOD3 PE=1 SV=1	84.785	5
1004	3.46	3.5	27.88	Q96QR8	PURB_HUMAN	Transcriptional activator protein Pur-beta OS=Homo sapiens GN=PURB PE=1 SV=3	33.241	4
1005	3.45	4.93	5.035	Q9Y6U3	ADSV_HUMAN	Adseverin OS=Homo sapiens GN=SCIN PE=1 SV=4	80.489	3
1006	3.43	3.51	6.25	P14678	RSMB_HUMAN	Small nuclear ribonucleoprotein-associated proteins B and B' OS=Homo sapiens GN=SNRPB PE=1 SV=2	24.61	2
1006	0	3.51	6.25	P63162	RSMN_HUMAN	Small nuclear ribonucleoprotein-associated protein N OS=Homo sapiens GN=SNRPN PE=1 SV=1	24.614	2
1007	3.43	3.45	10.93	P61081	UBC12_HUMAN	NEDD8-conjugating enzyme Ubc12 OS=Homo sapiens GN=UBE2M PE=1 SV=1	20.9	3
1008	3.42	3.48	13.51	P61626	LYSC_HUMAN	Lysozyme C OS=Homo sapiens GN=LYZ PE=1 SV=1	16.537	2
1009	3.39	15.08	4.555	P35580	MYH10_HUMAN	Myosin-10 OS=Homo sapiens GN=MYH10 PE=1 SV=3	228.999	2
1010	3.38	3.41	9.441	O75323	NIPS2_HUMAN	Protein NipSnap homolog 2 OS=Homo sapiens GN=GBAS PE=1 SV=1	33.743	3
1011	3.33	3.53	25.97	Q13442	HAP28_HUMAN	28 kDa heat- and acid-stable phosphoprotein OS=Homo sapiens GN=PDAP1 PE=1 SV=1	20.63	3
1012	3.32	3.53	3.868	P04920	B3A2_HUMAN	Anion exchange protein 2 OS=Homo sapiens GN=SLC4A2 PE=1 SV=4	137.009	3
1013	3.31	3.43	11.76	Q16695	H31T_HUMAN	Histone H3.1t OS=Homo sapiens GN=HIST3H3 PE=1 SV=3	15.508	2
1013	0	3.43	11.85	Q6NXT2	H3C_HUMAN	Histone H3.3C OS=Homo sapiens GN=H3F3C PE=1 SV=3	15.214	2
1013	0	3.43	11.76	P84243	H33_HUMAN	Histone H3.3 OS=Homo sapiens GN=H3F3A PE=1 SV=2	15.328	2
1013	0	3.43	11.76	Q71DI3	H32_HUMAN	Histone H3.2 OS=Homo sapiens GN=HIST2H3A PE=1 SV=3	15.388	2
1013	0	3.43	11.76	P68431	H31_HUMAN	Histone H3.1 OS=Homo sapiens GN=HIST1H3A PE=1 SV=2	15.404	2
1014	3.31	3.35	4.798	Q13438	OS9_HUMAN	Protein OS-9 OS=Homo sapiens GN=OS9 PE=1 SV=1	75.562	3
1015	3.28	3.49	1.656	Q9Y6K5	OAS3_HUMAN	2'-5'-oligoadenylate synthase 3 OS=Homo sapiens GN=OAS3 PE=1 SV=3	121.17	2
1016	3.27	3.34	21.33	Q16611	BAK_HUMAN	Bcl-2 homologous antagonist/killer OS=Homo sapiens GN=BAK1 PE=1 SV=1	23.409	2
1017	3.26	3.26	9.302	O95881	TXD12_HUMAN	Thioredoxin domain-containing protein 12 OS=Homo sapiens GN=TXNDC12 PE=1 SV=1	19.206	2
1018	3.25	4.08	0.8257	Q9UPN3	MACF1_HUMAN	Microtubule-actin cross-linking factor 1, isoforms 1/2/3/5 OS=Homo sapiens GN=MACF1 PE=1 SV=4	838.308	3
1019	3.24	3.3	11.4	Q96AT9	RPE_HUMAN	Ribulose-phosphate 3-epimerase OS=Homo sapiens GN=RPE PE=1 SV=1	24.928	2
1020	3.24	3.24	16.89	O60869	EDF1_HUMAN	Endothelial differentiation-related factor 1 OS=Homo sapiens GN=EDF1 PE=1 SV=1	16.369	3
1021	3.22	3.28	23.95	O75995	SASH3_HUMAN	SAM and SH3 domain-containing protein 3 OS=Homo sapiens GN=SASH3 PE=1 SV=2	41.595	4
1022	3.19	3.29	7.2	P13284	GILT_HUMAN	Gamma-interferon-inducible lysosomal thiol reductase OS=Homo sapiens GN=IFI30 PE=1 SV=3	27.964	2
1023	3.18	3.42	14.41	P14927	QCR7_HUMAN	Cytochrome b-c1 complex subunit 7 OS=Homo sapiens GN=UQCRB PE=1 SV=2	13.53	2
1024	3.18	3.28	15.13	Q9Y5Y2	NUBP2_HUMAN	Cytosolic Fe-S cluster assembly factor NUBP2 OS=Homo sapiens GN=NUBP2 PE=1 SV=1	28.825	2
1025	3.11	3.19	4.41	P78344	IF4G2_HUMAN	Eukaryotic translation initiation factor 4 gamma 2 OS=Homo sapiens GN=EIF4G2 PE=1 SV=1	102.362	3
1026	3.1	3.17	6.109	P53007	TXTP_HUMAN	Tricarboxylate transport protein, mitochondrial OS=Homo sapiens GN=SLC25A1 PE=1 SV=2	34.013	2
1027	3.09	3.12	6.26	Q15637	SF01_HUMAN	Splicing factor 1 OS=Homo sapiens GN=SF1 PE=1 SV=4	68.33	3
1028	3.09	3.09	48.42	P61956	SUMO2_HUMAN	Small ubiquitin-related modifier 2 OS=Homo sapiens GN=SUMO2 PE=1 SV=3	10.871	2
1028	0	3.09	44.66	P55854	SUMO3_HUMAN	Small ubiquitin-related modifier 3 OS=Homo sapiens GN=SUMO3 PE=1 SV=2	11.637	2
1029	3.07	7.55	10.55	P27361	MK03_HUMAN	Mitogen-activated protein kinase 3 OS=Homo sapiens GN=MAPK3 PE=1 SV=4	43.136	3
1030	3.06	3.54	6.34	P46734	MP2K3_HUMAN	Dual specificity mitogen-activated protein kinase kinase 3 OS=Homo sapiens GN=MAP2K3 PE=1 SV=2	39.318	2
1031	3.01	3.06	33.33	P09669	COX6C_HUMAN	Cytochrome c oxidase subunit 6C OS=Homo sapiens GN=COX6C PE=1 SV=2	8.781	3
1032	3	3	17.05	Q02543	RL18A_HUMAN	60S ribosomal protein L18a OS=Homo sapiens GN=RPL18A PE=1 SV=2	20.762	4
1033	2.99	3.2	8.294	O00231	PSD11_HUMAN	26S proteasome non-ATPase regulatory subunit 11 OS=Homo sapiens GN=PSMD11 PE=1 SV=3	47.464	3
1034	2.98	3.07	5.63	Q9BRQ8	AIFM2_HUMAN	Apoptosis-inducing factor 2 OS=Homo sapiens GN=AIFM2 PE=1 SV=1	40.527	2
1035	2.96	3.03	2.714	P17655	CAN2_HUMAN	Calpain-2 catalytic subunit OS=Homo sapiens GN=CAPN2 PE=1 SV=6	79.995	2
1036	2.96	2.98	9.246	O95352	ATG7_HUMAN	Ubiquitin-like modifier-activating enzyme ATG7 OS=Homo sapiens GN=ATG7 PE=1 SV=1	77.96	4
1037	2.95	2.97	13.19	Q9Y2B0	CNPY2_HUMAN	Protein canopy homolog 2 OS=Homo sapiens GN=CNPY2 PE=1 SV=1	20.652	2
1038	2.94	3.12	2.058	Q9NYU2	UGGG1_HUMAN	UDP-glucose:glycoprotein glucosyltransferase 1 OS=Homo sapiens GN=UGGT1 PE=1 SV=3	177.19	3
1039	2.92	3.62	18.01	Q9HAB8	PPCS_HUMAN	Phosphopantothenate--cysteine ligase OS=Homo sapiens GN=PPCS PE=1 SV=2	34.005	5
1040	2.9	3	11.42	Q9NR45	SIAS_HUMAN	Sialic acid synthase OS=Homo sapiens GN=NANS PE=1 SV=2	40.308	3
1041	2.9	2.91	19.79	Q07812	BAX_HUMAN	Apoptosis regulator BAX OS=Homo sapiens GN=BAX PE=1 SV=1	21.184	3
1042	2.89	2.98	6.513	P25789	PSA4_HUMAN	Proteasome subunit alpha type-4 OS=Homo sapiens GN=PSMA4 PE=1 SV=1	29.484	2
1043	2.89	2.95	3.734	P11182	ODB2_HUMAN	Lipoamide acyltransferase component of branched-chain alpha-keto acid dehydrogenase complex, mitochondrial OS=Homo sapiens GN=DBT PE=1 SV=3	53.487	2
1044	2.88	2.97	10.83	Q9Y5P6	GMPPB_HUMAN	Mannose-1-phosphate guanyltransferase beta OS=Homo sapiens GN=GMPPB PE=1 SV=2	39.834	3
1045	2.86	2.95	7.071	P25325	THTM_HUMAN	3-mercaptopyruvate sulfurtransferase OS=Homo sapiens GN=MPST PE=1 SV=3	33.178	3
1046	2.85	3.16	1.917	Q9NQT8	KI13B_HUMAN	Kinesin-like protein KIF13B OS=Homo sapiens GN=KIF13B PE=1 SV=1	202.789	2
1047	2.84	3.02	8.205	Q4V328	GRAP1_HUMAN	GRIP1-associated protein 1 OS=Homo sapiens GN=GRIPAP1 PE=1 SV=1	95.99	4
1048	2.84	2.94	3.448	P04424	ARLY_HUMAN	Argininosuccinate lyase OS=Homo sapiens GN=ASL PE=1 SV=4	51.658	2
1049	2.83	2.9	5.967	Q7L1Q6	BZW1_HUMAN	Basic leucine zipper and W2 domain-containing protein 1 OS=Homo sapiens GN=BZW1 PE=1 SV=1	48.043	3
1050	2.81	2.81	4.134	O95319	CELF2_HUMAN	CUGBP Elav-like family member 2 OS=Homo sapiens GN=CELF2 PE=1 SV=1	54.285	2
1051	2.8	2.93	11.74	P48444	COPD_HUMAN	Coatomer subunit delta OS=Homo sapiens GN=ARCN1 PE=1 SV=1	57.21	6
1052	2.79	2.96	5.081	Q9UHL4	DPP2_HUMAN	Dipeptidyl peptidase 2 OS=Homo sapiens GN=DPP7 PE=1 SV=3	54.341	2
1053	2.79	2.93	4.757	Q14289	FAK2_HUMAN	Protein-tyrosine kinase 2-beta OS=Homo sapiens GN=PTK2B PE=1 SV=2	115.875	4
1054	2.79	2.8	5.649	Q9NUU7	DD19A_HUMAN	ATP-dependent RNA helicase DDX19A OS=Homo sapiens GN=DDX19A PE=1 SV=1	53.975	3
1055	2.79	2.8	4.795	P50135	HNMT_HUMAN	Histamine N-methyltransferase OS=Homo sapiens GN=HNMT PE=1 SV=1	33.295	2
1056	2.77	2.85	19.34	P61204	ARF3_HUMAN	ADP-ribosylation factor 3 OS=Homo sapiens GN=ARF3 PE=1 SV=2	20.601	5
1057	2.77	2.84	7.826	P62854	RS26_HUMAN	40S ribosomal protein S26 OS=Homo sapiens GN=RPS26 PE=1 SV=3	13.015	1
1058	2.75	2.81	4.441	Q8TAT6	NPL4_HUMAN	Nuclear protein localization protein 4 homolog OS=Homo sapiens GN=NPLOC4 PE=1 SV=3	68.12	2
1059	2.75	2.77	8.37	Q9NX63	CHCH3_HUMAN	Coiled-coil-helix-coiled-coil-helix domain-containing protein 3, mitochondrial OS=Homo sapiens GN=CHCHD3 PE=1 SV=1	26.152	2
1060	2.74	2.8	14.83	P28074	PSB5_HUMAN	Proteasome subunit beta type-5 OS=Homo sapiens GN=PSMB5 PE=1 SV=3	28.48	4
1061	2.72	2.82	1.778	Q9GZZ6	ACH10_HUMAN	Neuronal acetylcholine receptor subunit alpha-10 OS=Homo sapiens GN=CHRNA10 PE=1 SV=1	49.705	2
1062	2.7	2.87	4.366	P48147	PPCE_HUMAN	Prolyl endopeptidase OS=Homo sapiens GN=PREP PE=1 SV=2	80.7	2
1063	2.69	2.89	2.609	P51798	CLCN7_HUMAN	H(+)/Cl(-) exchange transporter 7 OS=Homo sapiens GN=CLCN7 PE=1 SV=2	88.679	2
1064	2.69	2.69	15.7	Q9NX46	ARHL2_HUMAN	Poly(ADP-ribose) glycohydrolase ARH3 OS=Homo sapiens GN=ADPRHL2 PE=1 SV=1	38.947	5
1065	2.68	3.03	3.058	Q15042	RB3GP_HUMAN	Rab3 GTPase-activating protein catalytic subunit OS=Homo sapiens GN=RAB3GAP1 PE=1 SV=3	110.524	2
1066	2.68	2.86	2.975	O00139	KIF2A_HUMAN	Kinesin-like protein KIF2A OS=Homo sapiens GN=KIF2A PE=1 SV=3	79.955	2
1067	2.68	2.75	3.463	Q99460	PSMD1_HUMAN	26S proteasome non-ATPase regulatory subunit 1 OS=Homo sapiens GN=PSMD1 PE=1 SV=2	105.836	2
1068	2.67	2.67	4.681	P41227	NAA10_HUMAN	N-alpha-acetyltransferase 10 OS=Homo sapiens GN=NAA10 PE=1 SV=1	26.459	1
1069	2.66	2.83	4.243	Q9H078	CLPB_HUMAN	Caseinolytic peptidase B protein homolog OS=Homo sapiens GN=CLPB PE=1 SV=1	78.729	2
1070	2.66	2.72	2.116	Q9UKG1	DP13A_HUMAN	DCC-interacting protein 13-alpha OS=Homo sapiens GN=APPL1 PE=1 SV=1	79.663	1
1071	2.65	2.65	16.67	P30626	SORCN_HUMAN	Sorcin OS=Homo sapiens GN=SRI PE=1 SV=1	21.676	3
1072	2.64	2.71	7.917	Q96C19	EFHD2_HUMAN	EF-hand domain-containing protein D2 OS=Homo sapiens GN=EFHD2 PE=1 SV=1	26.697	2
1073	2.64	2.67	10.03	O43396	TXNL1_HUMAN	Thioredoxin-like protein 1 OS=Homo sapiens GN=TXNL1 PE=1 SV=3	32.251	2
1074	2.63	2.63	12.2	P50402	EMD_HUMAN	Emerin OS=Homo sapiens GN=EMD PE=1 SV=1	28.994	3
1075	2.62	4.82	10.32	P54578	UBP14_HUMAN	Ubiquitin carboxyl-terminal hydrolase 14 OS=Homo sapiens GN=USP14 PE=1 SV=3	56.069	3
1076	2.61	3.29	1.67	Q6P2Q9	PRP8_HUMAN	Pre-mRNA-processing-splicing factor 8 OS=Homo sapiens GN=PRPF8 PE=1 SV=2	273.6	2
1077	2.6	2.97	4.324	P51812	KS6A3_HUMAN	Ribosomal protein S6 kinase alpha-3 OS=Homo sapiens GN=RPS6KA3 PE=1 SV=1	83.736	1
1078	2.59	2.83	5.913	Q15008	PSMD6_HUMAN	26S proteasome non-ATPase regulatory subunit 6 OS=Homo sapiens GN=PSMD6 PE=1 SV=1	45.531	2
1079	2.58	2.62	11.28	Q86V81	THOC4_HUMAN	THO complex subunit 4 OS=Homo sapiens GN=ALYREF PE=1 SV=3	26.888	2
1080	2.58	2.59	11.69	P16083	NQO2_HUMAN	Ribosyldihydronicotinamide dehydrogenase [quinone] OS=Homo sapiens GN=NQO2 PE=1 SV=5	25.919	2
1081	2.58	2.58	20.47	P53999	TCP4_HUMAN	Activated RNA polymerase II transcriptional coactivator p15 OS=Homo sapiens GN=SUB1 PE=1 SV=3	14.395	2
1082	2.56	2.59	5.541	Q12797	ASPH_HUMAN	Aspartyl/asparaginyl beta-hydroxylase OS=Homo sapiens GN=ASPH PE=1 SV=3	85.863	2
1083	2.55	2.65	10.88	Q13043	STK4_HUMAN	Serine/threonine-protein kinase 4 OS=Homo sapiens GN=STK4 PE=1 SV=2	55.63	4
1084	2.55	2.58	9.89	Q9UBQ0	VPS29_HUMAN	Vacuolar protein sorting-associated protein 29 OS=Homo sapiens GN=VPS29 PE=1 SV=1	20.506	1
1085	2.54	2.62	33.58	P46779	RL28_HUMAN	60S ribosomal protein L28 OS=Homo sapiens GN=RPL28 PE=1 SV=3	15.748	4
1086	2.54	2.56	5.747	Q9UHY7	ENOPH_HUMAN	Enolase-phosphatase E1 OS=Homo sapiens GN=ENOPH1 PE=1 SV=1	28.933	2
1087	2.53	2.53	23.21	P56211	ARP19_HUMAN	cAMP-regulated phosphoprotein 19 OS=Homo sapiens GN=ARPP19 PE=1 SV=2	12.323	2
1088	2.52	2.59	6.1	Q02790	FKBP4_HUMAN	Peptidyl-prolyl cis-trans isomerase FKBP4 OS=Homo sapiens GN=FKBP4 PE=1 SV=3	51.805	2
1089	2.51	2.59	6.859	P29218	IMPA1_HUMAN	Inositol monophosphatase 1 OS=Homo sapiens GN=IMPA1 PE=1 SV=1	30.189	2
1090	2.5	2.98	3.252	Q9NRK6	ABCBA_HUMAN	ATP-binding cassette sub-family B member 10, mitochondrial OS=Homo sapiens GN=ABCB10 PE=1 SV=2	79.148	2
1091	2.5	2.6	1.368	Q9H0D6	XRN2_HUMAN	5'-3' exoribonuclease 2 OS=Homo sapiens GN=XRN2 PE=1 SV=1	108.582	1
1092	2.5	2.56	6.459	P50454	SERPH_HUMAN	Serpin H1 OS=Homo sapiens GN=SERPINH1 PE=1 SV=2	46.441	2
1093	2.47	2.54	5.263	P62495	ERF1_HUMAN	Eukaryotic peptide chain release factor subunit 1 OS=Homo sapiens GN=ETF1 PE=1 SV=3	49.031	2
1094	2.47	2.51	10.24	Q9Y5Z4	HEBP2_HUMAN	Heme-binding protein 2 OS=Homo sapiens GN=HEBP2 PE=1 SV=1	22.875	2
1095	2.45	2.74	8.264	P54725	RD23A_HUMAN	UV excision repair protein RAD23 homolog A OS=Homo sapiens GN=RAD23A PE=1 SV=1	39.609	1
1096	2.44	2.59	7.54	P78324	SHPS1_HUMAN	Tyrosine-protein phosphatase non-receptor type substrate 1 OS=Homo sapiens GN=SIRPA PE=1 SV=2	54.967	3
1097	2.44	2.5	6.695	Q9Y230	RUVB2_HUMAN	RuvB-like 2 OS=Homo sapiens GN=RUVBL2 PE=1 SV=3	51.157	3
1098	2.44	2.5	3.237	Q9BTZ2	DHRS4_HUMAN	Dehydrogenase/reductase SDR family member 4 OS=Homo sapiens GN=DHRS4 PE=1 SV=3	29.537	1
1099	2.44	2.44	7.187	P22059	OSBP1_HUMAN	Oxysterol-binding protein 1 OS=Homo sapiens GN=OSBP PE=1 SV=1	89.421	3
1100	2.42	2.44	7.448	P04844	RPN2_HUMAN	Dolichyl-diphosphooligosaccharide--protein glycosyltransferase subunit 2 OS=Homo sapiens GN=RPN2 PE=1 SV=3	69.284	4
1101	2.42	2.43	2.242	O96005	CLPT1_HUMAN	Cleft lip and palate transmembrane protein 1 OS=Homo sapiens GN=CLPTM1 PE=1 SV=1	76.097	2
1102	2.4	2.46	12.85	P09601	HMOX1_HUMAN	Heme oxygenase 1 OS=Homo sapiens GN=HMOX1 PE=1 SV=1	32.819	2
1103	2.39	2.55	7.937	Q14258	TRI25_HUMAN	E3 ubiquitin/ISG15 ligase TRIM25 OS=Homo sapiens GN=TRIM25 PE=1 SV=2	70.973	4
1104	2.39	2.49	4.02	Q7LBR1	CHM1B_HUMAN	Charged multivesicular body protein 1b OS=Homo sapiens GN=CHMP1B PE=1 SV=1	22.109	1
1105	2.38	2.45	6.069	P53597	SUCA_HUMAN	Succinyl-CoA ligase [ADP/GDP-forming] subunit alpha, mitochondrial OS=Homo sapiens GN=SUCLG1 PE=1 SV=4	36.25	1
1106	2.38	2.4	3.404	Q16134	ETFD_HUMAN	Electron transfer flavoprotein-ubiquinone oxidoreductase, mitochondrial OS=Homo sapiens GN=ETFDH PE=1 SV=2	68.495	2
1107	2.37	2.43	5.566	P05166	PCCB_HUMAN	Propionyl-CoA carboxylase beta chain, mitochondrial OS=Homo sapiens GN=PCCB PE=1 SV=3	58.216	2
1108	2.35	4.44	26.7	P60953	CDC42_HUMAN	Cell division control protein 42 homolog OS=Homo sapiens GN=CDC42 PE=1 SV=2	21.259	3
1109	2.33	2.33	32.35	P63218	GBG5_HUMAN	Guanine nucleotide-binding protein G(I)/G(S)/G(O) subunit gamma-5 OS=Homo sapiens GN=GNG5 PE=1 SV=3	7.318	3
1110	2.32	2.36	5.147	Q8NC51	PAIRB_HUMAN	Plasminogen activator inhibitor 1 RNA-binding protein OS=Homo sapiens GN=SERBP1 PE=1 SV=2	44.965	2
1111	2.31	2.37	4.853	Q96CV9	OPTN_HUMAN	Optineurin OS=Homo sapiens GN=OPTN PE=1 SV=2	65.921	2
1112	2.29	2.34	9.848	Q9NTK5	OLA1_HUMAN	Obg-like ATPase 1 OS=Homo sapiens GN=OLA1 PE=1 SV=2	44.744	3
1113	2.29	2.33	2.922	Q9NZ01	TECR_HUMAN	Trans-2,3-enoyl-CoA reductase OS=Homo sapiens GN=TECR PE=1 SV=1	36.034	1
1114	2.28	2.77	0.6394	Q92817	EVPL_HUMAN	Envoplakin OS=Homo sapiens GN=EVPL PE=1 SV=3	231.604	1
1115	2.28	2.42	5.367	Q96T51	RUFY1_HUMAN	RUN and FYVE domain-containing protein 1 OS=Homo sapiens GN=RUFY1 PE=1 SV=2	79.818	3
1116	2.27	3.13	1.901	A0AVT1	UBA6_HUMAN	Ubiquitin-like modifier-activating enzyme 6 OS=Homo sapiens GN=UBA6 PE=1 SV=1	117.97	1
1117	2.27	2.96	7.429	Q12792	TWF1_HUMAN	Twinfilin-1 OS=Homo sapiens GN=TWF1 PE=1 SV=3	40.283	1
1118	2.27	2.35	1.589	Q68EM7	RHG17_HUMAN	Rho GTPase-activating protein 17 OS=Homo sapiens GN=ARHGAP17 PE=1 SV=1	95.437	1
1119	2.27	2.33	3.759	Q5TDH0	DDI2_HUMAN	Protein DDI1 homolog 2 OS=Homo sapiens GN=DDI2 PE=1 SV=1	44.523	1
1120	2.26	11.32	13.51	Q13310	PABP4_HUMAN	Polyadenylate-binding protein 4 OS=Homo sapiens GN=PABPC4 PE=1 SV=1	70.783	3
1121	2.26	2.38	0.7317	Q86VP6	CAND1_HUMAN	Cullin-associated NEDD8-dissociated protein 1 OS=Homo sapiens GN=CAND1 PE=1 SV=2	136.376	1
1122	2.26	2.34	5.73	Q96L92	SNX27_HUMAN	Sorting nexin-27 OS=Homo sapiens GN=SNX27 PE=1 SV=2	61.265	2
1123	2.26	2.32	21.88	Q9H444	CHM4B_HUMAN	Charged multivesicular body protein 4b OS=Homo sapiens GN=CHMP4B PE=1 SV=1	24.95	4
1124	2.25	2.46	2.866	P41226	UBA7_HUMAN	Ubiquitin-like modifier-activating enzyme 7 OS=Homo sapiens GN=UBA7 PE=1 SV=2	111.694	3
1125	2.25	2.4	8.385	Q14166	TTL12_HUMAN	Tubulin--tyrosine ligase-like protein 12 OS=Homo sapiens GN=TTLL12 PE=1 SV=2	74.404	4
1126	2.25	2.3	0.9751	O14786	NRP1_HUMAN	Neuropilin-1 OS=Homo sapiens GN=NRP1 PE=1 SV=3	103.134	1
1127	2.24	2.6	3.842	Q12979	ABR_HUMAN	Active breakpoint cluster region-related protein OS=Homo sapiens GN=ABR PE=2 SV=2	97.598	2
1128	2.24	2.39	2.218	O60443	DFNA5_HUMAN	Non-syndromic hearing impairment protein 5 OS=Homo sapiens GN=DFNA5 PE=1 SV=2	54.555	1
1129	2.24	2.3	2.419	P42785	PCP_HUMAN	Lysosomal Pro-X carboxypeptidase OS=Homo sapiens GN=PRCP PE=1 SV=1	55.8	1
1130	2.24	2.28	3.138	P04004	VTNC_HUMAN	Vitronectin OS=Homo sapiens GN=VTN PE=1 SV=1	54.306	1
1131	2.24	2.24	2.606	Q9NP79	VTA1_HUMAN	Vacuolar protein sorting-associated protein VTA1 homolog OS=Homo sapiens GN=VTA1 PE=1 SV=1	33.879	1
1132	2.22	2.28	15.85	Q9NX76	CKLF6_HUMAN	CKLF-like MARVEL transmembrane domain-containing protein 6 OS=Homo sapiens GN=CMTM6 PE=1 SV=1	20.419	2
1133	2.22	2.22	15.69	Q5VTU8	AT5EL_HUMAN	ATP synthase subunit epsilon-like protein, mitochondrial OS=Homo sapiens GN=ATP5EP2 PE=1 SV=1	5.807	1
1133	0	2.22	15.69	P56381	ATP5E_HUMAN	ATP synthase subunit epsilon, mitochondrial OS=Homo sapiens GN=ATP5E PE=1 SV=2	5.78	1
1134	2.21	2.33	3.292	Q13409	DC1I2_HUMAN	Cytoplasmic dynein 1 intermediate chain 2 OS=Homo sapiens GN=DYNC1I2 PE=1 SV=3	71.457	1
1135	2.21	2.31	1.42	O95822	DCMC_HUMAN	Malonyl-CoA decarboxylase, mitochondrial OS=Homo sapiens GN=MLYCD PE=1 SV=3	55.003	1
1136	2.21	2.24	2.769	Q13347	EIF3I_HUMAN	Eukaryotic translation initiation factor 3 subunit I OS=Homo sapiens GN=EIF3I PE=1 SV=1	36.502	1
1137	2.21	2.21	7.742	P10620	MGST1_HUMAN	Microsomal glutathione S-transferase 1 OS=Homo sapiens GN=MGST1 PE=1 SV=1	17.599	1
1138	2.2	2.25	4.839	O75935	DCTN3_HUMAN	Dynactin subunit 3 OS=Homo sapiens GN=DCTN3 PE=1 SV=1	21.119	1
1139	2.2	2.23	6.734	Q12846	STX4_HUMAN	Syntaxin-4 OS=Homo sapiens GN=STX4 PE=1 SV=2	34.18	2
1140	2.2	2.22	8.032	Q9P0L0	VAPA_HUMAN	Vesicle-associated membrane protein-associated protein A OS=Homo sapiens GN=VAPA PE=1 SV=3	27.893	2
1141	2.2	2.2	23.85	Q15121	PEA15_HUMAN	Astrocytic phosphoprotein PEA-15 OS=Homo sapiens GN=PEA15 PE=1 SV=2	15.04	3
1142	2.2	2.2	12.57	O00193	SMAP_HUMAN	Small acidic protein OS=Homo sapiens GN=SMAP PE=1 SV=1	20.333	1
1143	2.19	2.29	14.37	Q9H5X1	FA96A_HUMAN	MIP18 family protein FAM96A OS=Homo sapiens GN=FAM96A PE=1 SV=1	18.355	2
1144	2.19	2.19	5.201	Q96HC4	PDLI5_HUMAN	PDZ and LIM domain protein 5 OS=Homo sapiens GN=PDLIM5 PE=1 SV=5	63.945	2
1145	2.18	2.3	2.391	Q9ULH1	ASAP1_HUMAN	Arf-GAP with SH3 domain, ANK repeat and PH domain-containing protein 1 OS=Homo sapiens GN=ASAP1 PE=1 SV=4	125.498	2
1146	2.18	2.28	1.887	O43143	DHX15_HUMAN	Putative pre-mRNA-splicing factor ATP-dependent RNA helicase DHX15 OS=Homo sapiens GN=DHX15 PE=1 SV=2	90.933	1
1147	2.18	2.18	9.796	P56537	IF6_HUMAN	Eukaryotic translation initiation factor 6 OS=Homo sapiens GN=EIF6 PE=1 SV=1	26.599	1
1148	2.17	6.59	27.98	P61586	RHOA_HUMAN	Transforming protein RhoA OS=Homo sapiens GN=RHOA PE=1 SV=1	21.768	1
1149	2.17	2.53	0.8767	Q9Y5S2	MRCKB_HUMAN	Serine/threonine-protein kinase MRCK beta OS=Homo sapiens GN=CDC42BPB PE=1 SV=2	194.315	1
1150	2.17	2.26	6.954	P42126	ECI1_HUMAN	Enoyl-CoA delta isomerase 1, mitochondrial OS=Homo sapiens GN=ECI1 PE=1 SV=1	32.816	2
1151	2.17	2.24	6.509	O95433	AHSA1_HUMAN	Activator of 90 kDa heat shock protein ATPase homolog 1 OS=Homo sapiens GN=AHSA1 PE=1 SV=1	38.274	1
1152	2.17	2.23	7.035	Q8N2K0	ABD12_HUMAN	Monoacylglycerol lipase ABHD12 OS=Homo sapiens GN=ABHD12 PE=2 SV=2	45.097	2
1153	2.16	2.27	2.5	Q92743	HTRA1_HUMAN	Serine protease HTRA1 OS=Homo sapiens GN=HTRA1 PE=1 SV=1	51.287	1
1154	2.16	2.18	9.95	P43487	RANG_HUMAN	Ran-specific GTPase-activating protein OS=Homo sapiens GN=RANBP1 PE=1 SV=1	23.31	2
1155	2.16	2.17	18.1	Q9UK41	VPS28_HUMAN	Vacuolar protein sorting-associated protein 28 homolog OS=Homo sapiens GN=VPS28 PE=1 SV=1	25.425	2
1156	2.16	2.16	19.64	P62273	RS29_HUMAN	40S ribosomal protein S29 OS=Homo sapiens GN=RPS29 PE=1 SV=2	6.677	1
1157	2.15	27.69	5.94	Q9Y4G6	TLN2_HUMAN	Talin-2 OS=Homo sapiens GN=TLN2 PE=1 SV=4	271.613	2
1158	2.15	2.19	2.387	Q9H7Z7	PGES2_HUMAN	Prostaglandin E synthase 2 OS=Homo sapiens GN=PTGES2 PE=1 SV=1	41.943	1
1159	2.15	2.15	7.831	Q13405	RM49_HUMAN	39S ribosomal protein L49, mitochondrial OS=Homo sapiens GN=MRPL49 PE=1 SV=1	19.198	1
1160	2.14	5.73	9.186	O75688	PPM1B_HUMAN	Protein phosphatase 1B OS=Homo sapiens GN=PPM1B PE=1 SV=1	52.643	2
1161	2.14	2.45	1.807	Q13488	VPP3_HUMAN	V-type proton ATPase 116 kDa subunit a isoform 3 OS=Homo sapiens GN=TCIRG1 PE=1 SV=3	92.968	1
1162	2.14	2.2	5.835	Q9BRR6	ADPGK_HUMAN	ADP-dependent glucokinase OS=Homo sapiens GN=ADPGK PE=1 SV=1	54.089	2
1163	2.14	2.19	1.66	P26639	SYTC_HUMAN	Threonine--tRNA ligase, cytoplasmic OS=Homo sapiens GN=TARS PE=1 SV=3	83.435	1
1164	2.13	2.56	3.46	Q96HS1	PGAM5_HUMAN	Serine/threonine-protein phosphatase PGAM5, mitochondrial OS=Homo sapiens GN=PGAM5 PE=1 SV=2	32.004	1
1165	2.13	2.2	5.144	O15229	KMO_HUMAN	Kynurenine 3-monooxygenase OS=Homo sapiens GN=KMO PE=1 SV=2	55.81	2
1166	2.13	2.19	10.67	P08571	CD14_HUMAN	Monocyte differentiation antigen CD14 OS=Homo sapiens GN=CD14 PE=1 SV=2	40.076	2
1167	2.13	2.19	4.065	Q00059	TFAM_HUMAN	Transcription factor A, mitochondrial OS=Homo sapiens GN=TFAM PE=1 SV=1	29.097	1
1168	2.13	2.18	9.113	Q9HCU5	PREB_HUMAN	Prolactin regulatory element-binding protein OS=Homo sapiens GN=PREB PE=1 SV=2	45.468	2
1169	2.12	2.36	1.901	Q13459	MYO9B_HUMAN	Unconventional myosin-IXb OS=Homo sapiens GN=MYO9B PE=1 SV=3	243.401	3
1170	2.12	2.18	5.286	P23469	PTPRE_HUMAN	Receptor-type tyrosine-protein phosphatase epsilon OS=Homo sapiens GN=PTPRE PE=1 SV=1	80.642	3
1171	2.12	2.17	4.27	P60228	EIF3E_HUMAN	Eukaryotic translation initiation factor 3 subunit E OS=Homo sapiens GN=EIF3E PE=1 SV=1	52.221	2
1172	2.12	2.14	6.818	O15372	EIF3H_HUMAN	Eukaryotic translation initiation factor 3 subunit H OS=Homo sapiens GN=EIF3H PE=1 SV=1	39.93	2
1173	2.12	2.12	11.61	Q99611	SPS2_HUMAN	Selenide, water dikinase 2 OS=Homo sapiens GN=SEPHS2 PE=1 SV=3	47.305	4
1174	2.11	8.64	17.59	P55795	HNRH2_HUMAN	Heterogeneous nuclear ribonucleoprotein H2 OS=Homo sapiens GN=HNRNPH2 PE=1 SV=1	49.264	2
1175	2.11	2.97	21.95	P42766	RL35_HUMAN	60S ribosomal protein L35 OS=Homo sapiens GN=RPL35 PE=1 SV=2	14.551	3
1176	2.11	2.34	1.327	P23229	ITA6_HUMAN	Integrin alpha-6 OS=Homo sapiens GN=ITGA6 PE=1 SV=4	126.606	1
1177	2.11	2.28	0.8864	P23634	AT2B4_HUMAN	Plasma membrane calcium-transporting ATPase 4 OS=Homo sapiens GN=ATP2B4 PE=1 SV=2	137.92	1
1178	2.11	2.18	7.302	Q8NFV4	ABHDB_HUMAN	Abhydrolase domain-containing protein 11 OS=Homo sapiens GN=ABHD11 PE=1 SV=1	34.69	2
1179	2.11	2.18	21.56	P00492	HPRT_HUMAN	Hypoxanthine-guanine phosphoribosyltransferase OS=Homo sapiens GN=HPRT1 PE=1 SV=2	24.579	4
1180	2.11	2.17	2.254	Q9Y217	MTMR6_HUMAN	Myotubularin-related protein 6 OS=Homo sapiens GN=MTMR6 PE=1 SV=3	71.968	1
1181	2.11	2.16	5.057	Q96CW1	AP2M1_HUMAN	AP-2 complex subunit mu OS=Homo sapiens GN=AP2M1 PE=1 SV=2	49.655	2
1182	2.11	2.16	12.43	P31942	HNRH3_HUMAN	Heterogeneous nuclear ribonucleoprotein H3 OS=Homo sapiens GN=HNRNPH3 PE=1 SV=2	36.926	2
1183	2.11	2.13	5.882	Q16540	RM23_HUMAN	39S ribosomal protein L23, mitochondrial OS=Homo sapiens GN=MRPL23 PE=1 SV=1	17.781	1
1184	2.1	2.29	0.299	Q96RV3	PCX1_HUMAN	Pecanex-like protein 1 OS=Homo sapiens GN=PCNX PE=2 SV=2	258.676	1
1185	2.1	2.23	1.648	P55060	XPO2_HUMAN	Exportin-2 OS=Homo sapiens GN=CSE1L PE=1 SV=3	110.417	1
1186	2.1	2.23	11.55	Q15404	RSU1_HUMAN	Ras suppressor protein 1 OS=Homo sapiens GN=RSU1 PE=1 SV=3	31.54	2
1187	2.1	2.16	2.783	Q3LXA3	DHAK_HUMAN	Bifunctional ATP-dependent dihydroxyacetone kinase/FAD-AMP lyase (cyclizing) OS=Homo sapiens GN=DAK PE=1 SV=2	58.947	1
1188	2.1	2.14	16.95	P62861	RS30_HUMAN	40S ribosomal protein S30 OS=Homo sapiens GN=FAU PE=1 SV=1	6.648	1
1189	2.1	2.1	18.13	P46778	RL21_HUMAN	60S ribosomal protein L21 OS=Homo sapiens GN=RPL21 PE=1 SV=2	18.565	2
1191	2.09	2.14	5.963	Q03013	GSTM4_HUMAN	Glutathione S-transferase Mu 4 OS=Homo sapiens GN=GSTM4 PE=1 SV=3	25.561	1
1192	2.09	2.09	26.83	O14949	QCR8_HUMAN	Cytochrome b-c1 complex subunit 8 OS=Homo sapiens GN=UQCRQ PE=1 SV=4	9.906	2
1193	2.09	2.09	6.494	P00441	SODC_HUMAN	Superoxide dismutase [Cu-Zn] OS=Homo sapiens GN=SOD1 PE=1 SV=2	15.936	1
1194	2.08	11.84	30.96	P13746	1A11_HUMAN	HLA class I histocompatibility antigen, A-11 alpha chain OS=Homo sapiens GN=HLA-A PE=1 SV=1	40.937	2
1195	2.08	2.58	25.62	Q9UNH7	SNX6_HUMAN	Sorting nexin-6 OS=Homo sapiens GN=SNX6 PE=1 SV=1	46.649	8
1196	2.08	2.29	0.8975	Q29RF7	PDS5A_HUMAN	Sister chromatid cohesion protein PDS5 homolog A OS=Homo sapiens GN=PDS5A PE=1 SV=1	150.83	1
1197	2.08	2.1	1.189	P51116	FXR2_HUMAN	Fragile X mental retardation syndrome-related protein 2 OS=Homo sapiens GN=FXR2 PE=1 SV=2	74.223	1
1198	2.08	2.1	7.076	Q99829	CPNE1_HUMAN	Copine-1 OS=Homo sapiens GN=CPNE1 PE=1 SV=1	59.059	3
1199	2.07	5.3	2.7	Q5JWF2	GNAS1_HUMAN	Guanine nucleotide-binding protein G(s) subunit alpha isoforms XLas OS=Homo sapiens GN=GNAS PE=1 SV=2	111.025	1
1200	2.07	4.09	3.541	O00499	BIN1_HUMAN	Myc box-dependent-interacting protein 1 OS=Homo sapiens GN=BIN1 PE=1 SV=1	64.699	1
1201	2.07	2.51	1.818	Q86TB9	PATL1_HUMAN	Protein PAT1 homolog 1 OS=Homo sapiens GN=PATL1 PE=1 SV=2	86.85	1
1203	2.07	2.24	9.816	Q9BX68	HINT2_HUMAN	Histidine triad nucleotide-binding protein 2, mitochondrial OS=Homo sapiens GN=HINT2 PE=1 SV=1	17.162	2
1204	2.07	2.23	3.886	Q92581	SL9A6_HUMAN	Sodium/hydrogen exchanger 6 OS=Homo sapiens GN=SLC9A6 PE=1 SV=2	74.162	2
1205	2.07	2.12	3.918	Q9H257	CARD9_HUMAN	Caspase recruitment domain-containing protein 9 OS=Homo sapiens GN=CARD9 PE=1 SV=2	62.241	2
1206	2.07	2.12	9.009	Q8TAE8	G45IP_HUMAN	Growth arrest and DNA damage-inducible proteins-interacting protein 1 OS=Homo sapiens GN=GADD45GIP1 PE=1 SV=1	25.384	1
1207	2.07	2.1	16.3	P0CW22	RS17L_HUMAN	40S ribosomal protein S17-like OS=Homo sapiens GN=RPS17L PE=3 SV=1	15.55	2
1207	0	2.1	16.3	P08708	RS17_HUMAN	40S ribosomal protein S17 OS=Homo sapiens GN=RPS17 PE=1 SV=2	15.55	2
1208	2.07	2.09	2.703	A6NHQ2	FBLL1_HUMAN	rRNA/tRNA 2'-O-methyltransferase fibrillarin-like protein 1 OS=Homo sapiens GN=FBLL1 PE=3 SV=1	34.803	1
1209	2.07	2.09	4.664	P12931	SRC_HUMAN	Proto-oncogene tyrosine-protein kinase Src OS=Homo sapiens GN=SRC PE=1 SV=3	59.835	2
1210	2.07	2.09	20.3	P62847	RS24_HUMAN	40S ribosomal protein S24 OS=Homo sapiens GN=RPS24 PE=1 SV=1	15.423	2
1211	2.06	8.78	30.92	Q92930	RAB8B_HUMAN	Ras-related protein Rab-8B OS=Homo sapiens GN=RAB8B PE=1 SV=2	23.584	3
1213	2.06	4.29	1.009	Q9NS87	KIF15_HUMAN	Kinesin-like protein KIF15 OS=Homo sapiens GN=KIF15 PE=1 SV=1	160.16	1
1214	2.06	2.47	3.578	Q9NPQ8	RIC8A_HUMAN	Synembryn-A OS=Homo sapiens GN=RIC8A PE=1 SV=3	59.71	1
1215	2.06	2.19	0.6883	Q9Y2M0	FAN1_HUMAN	Fanconi-associated nuclease 1 OS=Homo sapiens GN=FAN1 PE=1 SV=4	114.225	1
1216	2.06	2.18	1.25	Q96JJ3	ELMO2_HUMAN	Engulfment and cell motility protein 2 OS=Homo sapiens GN=ELMO2 PE=1 SV=2	82.615	1
1217	2.06	2.13	0.8197	Q9ULJ8	NEB1_HUMAN	Neurabin-1 OS=Homo sapiens GN=PPP1R9A PE=1 SV=2	123.342	1
1218	2.06	2.12	5.151	Q9HCC0	MCCB_HUMAN	Methylcrotonoyl-CoA carboxylase beta chain, mitochondrial OS=Homo sapiens GN=MCCC2 PE=1 SV=1	61.333	2
1219	2.06	2.06	11.79	Q9BRX8	F213A_HUMAN	Redox-regulatory protein FAM213A OS=Homo sapiens GN=FAM213A PE=1 SV=3	25.764	2
1220	2.06	2.06	11.28	O00264	PGRC1_HUMAN	Membrane-associated progesterone receptor component 1 OS=Homo sapiens GN=PGRMC1 PE=1 SV=3	21.671	2
1221	2.05	6.29	13.73	P52597	HNRPF_HUMAN	Heterogeneous nuclear ribonucleoprotein F OS=Homo sapiens GN=HNRNPF PE=1 SV=3	45.672	2
1222	2.05	4.22	3.807	Q15029	U5S1_HUMAN	116 kDa U5 small nuclear ribonucleoprotein component OS=Homo sapiens GN=EFTUD2 PE=1 SV=1	109.436	2
1223	2.05	4.09	14.06	P39687	AN32A_HUMAN	Acidic leucine-rich nuclear phosphoprotein 32 family member A OS=Homo sapiens GN=ANP32A PE=1 SV=1	28.585	2
1224	2.05	2.59	0.6098	Q92878	RAD50_HUMAN	DNA repair protein RAD50 OS=Homo sapiens GN=RAD50 PE=1 SV=1	153.892	1
1225	2.05	2.18	1.711	Q6P1M0	S27A4_HUMAN	Long-chain fatty acid transport protein 4 OS=Homo sapiens GN=SLC27A4 PE=1 SV=1	72.064	1
1226	2.05	2.16	1.164	Q13574	DGKZ_HUMAN	Diacylglycerol kinase zeta OS=Homo sapiens GN=DGKZ PE=1 SV=3	124.128	1
1227	2.05	2.13	3.005	P23219	PGH1_HUMAN	Prostaglandin G/H synthase 1 OS=Homo sapiens GN=PTGS1 PE=1 SV=2	68.686	1
1228	2.05	2.1	27.73	P62314	SMD1_HUMAN	Small nuclear ribonucleoprotein Sm D1 OS=Homo sapiens GN=SNRPD1 PE=1 SV=1	13.282	2
1229	2.05	2.09	1.483	Q9Y6M7	S4A7_HUMAN	Sodium bicarbonate cotransporter 3 OS=Homo sapiens GN=SLC4A7 PE=1 SV=2	136.044	1
1230	2.05	2.09	1.605	Q0JRZ9	FCHO2_HUMAN	FCH domain only protein 2 OS=Homo sapiens GN=FCHO2 PE=1 SV=2	88.924	2
1231	2.05	2.07	9.44	Q9Y394	DHRS7_HUMAN	Dehydrogenase/reductase SDR family member 7 OS=Homo sapiens GN=DHRS7 PE=1 SV=1	38.299	3
1232	2.05	2.07	4	P43897	EFTS_HUMAN	Elongation factor Ts, mitochondrial OS=Homo sapiens GN=TSFM PE=1 SV=2	35.391	1
1233	2.05	2.05	14.41	P58546	MTPN_HUMAN	Myotrophin OS=Homo sapiens GN=MTPN PE=1 SV=2	12.895	1
1234	2.04	5.68	2.667	Q9NSB2	KRT84_HUMAN	Keratin, type II cuticular Hb4 OS=Homo sapiens GN=KRT84 PE=1 SV=2	64.842	1
1235	2.04	2.22	2.767	P06756	ITAV_HUMAN	Integrin alpha-V OS=Homo sapiens GN=ITGAV PE=1 SV=2	116.038	2
1236	2.04	2.2	0.5295	Q7Z589	EMSY_HUMAN	Protein EMSY OS=Homo sapiens GN=EMSY PE=1 SV=2	141.468	1
1237	2.04	2.16	3.289	O94826	TOM70_HUMAN	Mitochondrial import receptor subunit TOM70 OS=Homo sapiens GN=TOMM70A PE=1 SV=1	67.455	2
1238	2.04	2.15	0.9516	Q86VB7	C163A_HUMAN	Scavenger receptor cysteine-rich type 1 protein M130 OS=Homo sapiens GN=CD163 PE=1 SV=2	125.451	1
1239	2.04	2.11	4.095	P49821	NDUV1_HUMAN	NADH dehydrogenase [ubiquinone] flavoprotein 1, mitochondrial OS=Homo sapiens GN=NDUFV1 PE=1 SV=4	50.817	2
1240	2.04	2.1	5.424	P50226	ST1A2_HUMAN	Sulfotransferase 1A2 OS=Homo sapiens GN=SULT1A2 PE=1 SV=2	34.31	2
1241	2.04	2.09	4.728	P50440	GATM_HUMAN	Glycine amidinotransferase, mitochondrial OS=Homo sapiens GN=GATM PE=1 SV=1	48.455	1
1242	2.04	2.07	1.654	Q7L5N7	PCAT2_HUMAN	Lysophosphatidylcholine acyltransferase 2 OS=Homo sapiens GN=LPCAT2 PE=1 SV=1	60.208	1
1243	2.04	2.07	3.929	Q9H3N1	TMX1_HUMAN	Thioredoxin-related transmembrane protein 1 OS=Homo sapiens GN=TMX1 PE=1 SV=1	31.791	1
1244	2.04	2.07	8.28	Q9NT62	ATG3_HUMAN	Ubiquitin-like-conjugating enzyme ATG3 OS=Homo sapiens GN=ATG3 PE=1 SV=1	35.864	2
1245	2.04	2.06	1.034	P15144	AMPN_HUMAN	Aminopeptidase N OS=Homo sapiens GN=ANPEP PE=1 SV=4	109.54	1
1246	2.04	2.04	7.865	O75531	BAF_HUMAN	Barrier-to-autointegration factor OS=Homo sapiens GN=BANF1 PE=1 SV=1	10.059	1
1247	2.03	8.13	25.12	P61006	RAB8A_HUMAN	Ras-related protein Rab-8A OS=Homo sapiens GN=RAB8A PE=1 SV=1	23.668	1
1248	2.03	4.32	3.476	O75439	MPPB_HUMAN	Mitochondrial-processing peptidase subunit beta OS=Homo sapiens GN=PMPCB PE=1 SV=2	54.366	1
1249	2.03	4.05	10.96	O15264	MK13_HUMAN	Mitogen-activated protein kinase 13 OS=Homo sapiens GN=MAPK13 PE=1 SV=1	42.09	3
1250	2.03	2.26	1.172	P48454	PP2BC_HUMAN	Serine/threonine-protein phosphatase 2B catalytic subunit gamma isoform OS=Homo sapiens GN=PPP3CC PE=1 SV=3	58.129	1
1251	2.03	2.23	1.201	Q14005	IL16_HUMAN	Pro-interleukin-16 OS=Homo sapiens GN=IL16 PE=1 SV=4	141.752	1
1253	2.03	2.16	4.971	Q8N1S5	S39AB_HUMAN	Zinc transporter ZIP11 OS=Homo sapiens GN=SLC39A11 PE=2 SV=3	35.396	1
1254	2.03	2.14	3.883	Q14318	FKBP8_HUMAN	Peptidyl-prolyl cis-trans isomerase FKBP8 OS=Homo sapiens GN=FKBP8 PE=1 SV=2	44.562	1
1255	2.03	2.13	1.876	P35221	CTNA1_HUMAN	Catenin alpha-1 OS=Homo sapiens GN=CTNNA1 PE=1 SV=1	100.071	1
1256	2.03	2.13	5.14	Q8WVM8	SCFD1_HUMAN	Sec1 family domain-containing protein 1 OS=Homo sapiens GN=SCFD1 PE=1 SV=4	72.38	2
1257	2.03	2.13	1.869	P51649	SSDH_HUMAN	Succinate-semialdehyde dehydrogenase, mitochondrial OS=Homo sapiens GN=ALDH5A1 PE=1 SV=2	57.215	1
1258	2.03	2.12	4.29	P53367	ARFP1_HUMAN	Arfaptin-1 OS=Homo sapiens GN=ARFIP1 PE=1 SV=2	41.738	1
1259	2.03	2.11	1.915	Q9Y2H0	DLGP4_HUMAN	Disks large-associated protein 4 OS=Homo sapiens GN=DLGAP4 PE=1 SV=3	108.012	1
1260	2.03	2.1	0.6241	Q9C0A6	SETD5_HUMAN	SET domain-containing protein 5 OS=Homo sapiens GN=SETD5 PE=1 SV=2	157.515	1
1261	2.03	2.09	14.29	P68036	UB2L3_HUMAN	Ubiquitin-conjugating enzyme E2 L3 OS=Homo sapiens GN=UBE2L3 PE=1 SV=1	17.862	1
1262	2.03	2.06	9.18	Q13151	ROA0_HUMAN	Heterogeneous nuclear ribonucleoprotein A0 OS=Homo sapiens GN=HNRNPA0 PE=1 SV=1	30.841	2
1263	2.03	2.06	9.225	Q96FW1	OTUB1_HUMAN	Ubiquitin thioesterase OTUB1 OS=Homo sapiens GN=OTUB1 PE=1 SV=2	31.284	2
1264	2.03	2.04	7.808	P07711	CATL1_HUMAN	Cathepsin L1 OS=Homo sapiens GN=CTSL1 PE=1 SV=2	37.564	2
1265	2.03	2.03	7.6	Q96EY8	MMAB_HUMAN	Cob(I)yrinic acid a,c-diamide adenosyltransferase, mitochondrial OS=Homo sapiens GN=MMAB PE=1 SV=1	27.388	2
1266	2.03	2.03	12.64	O43681	ASNA_HUMAN	ATPase ASNA1 OS=Homo sapiens GN=ASNA1 PE=1 SV=2	38.793	2
1267	2.03	2.03	4.969	P20292	AL5AP_HUMAN	Arachidonate 5-lipoxygenase-activating protein OS=Homo sapiens GN=ALOX5AP PE=1 SV=2	18.157	1
1268	2.02	15.44	26.02	Q04917	1433F_HUMAN	14-3-3 protein eta OS=Homo sapiens GN=YWHAH PE=1 SV=4	28.219	1
1269	2.02	10.59	15.93	O00757	F16P2_HUMAN	Fructose-1,6-bisphosphatase isozyme 2 OS=Homo sapiens GN=FBP2 PE=1 SV=2	36.743	2
1270	2.02	8.32	20.22	O75828	CBR3_HUMAN	Carbonyl reductase [NADPH] 3 OS=Homo sapiens GN=CBR3 PE=1 SV=3	30.85	2
1271	2.02	4.1	3.086	Q9HA65	TBC17_HUMAN	TBC1 domain family member 17 OS=Homo sapiens GN=TBC1D17 PE=2 SV=2	72.728	1
1272	2.02	2.25	0.4184	Q14839	CHD4_HUMAN	Chromodomain-helicase-DNA-binding protein 4 OS=Homo sapiens GN=CHD4 PE=1 SV=2	218.005	1
1273	2.02	2.17	0.9337	O75044	FNBP2_HUMAN	SLIT-ROBO Rho GTPase-activating protein 2 OS=Homo sapiens GN=SRGAP2 PE=1 SV=2	120.881	1
1274	2.02	2.15	4.59	Q5T653	RM02_HUMAN	39S ribosomal protein L2, mitochondrial OS=Homo sapiens GN=MRPL2 PE=1 SV=2	33.301	1
1275	2.02	2.14	1.24	Q9H4L5	OSBL3_HUMAN	Oxysterol-binding protein-related protein 3 OS=Homo sapiens GN=OSBPL3 PE=1 SV=1	101.224	1
1276	2.02	2.14	7.326	Q96D96	HVCN1_HUMAN	Voltage-gated hydrogen channel 1 OS=Homo sapiens GN=HVCN1 PE=1 SV=1	31.683	1
1277	2.02	2.13	3.976	Q86X76	NIT1_HUMAN	Nitrilase homolog 1 OS=Homo sapiens GN=NIT1 PE=1 SV=2	35.896	1
1278	2.02	2.12	0.8403	A2RUB1	CQ104_HUMAN	Uncharacterized protein C17orf104 OS=Homo sapiens GN=C17orf104 PE=2 SV=3	107.559	1
1279	2.02	2.12	1.237	Q9BZF1	OSBL8_HUMAN	Oxysterol-binding protein-related protein 8 OS=Homo sapiens GN=OSBPL8 PE=1 SV=3	101.196	1
1280	2.02	2.11	8.3	Q96S44	PRPK_HUMAN	TP53-regulating kinase OS=Homo sapiens GN=TP53RK PE=1 SV=2	28.16	1
1281	2.02	2.11	7.143	Q9BT78	CSN4_HUMAN	COP9 signalosome complex subunit 4 OS=Homo sapiens GN=COPS4 PE=1 SV=1	46.269	2
1282	2.02	2.11	6.557	O00442	RTCA_HUMAN	RNA 3'-terminal phosphate cyclase OS=Homo sapiens GN=RTCA PE=1 SV=1	39.337	2
1283	2.02	2.1	8.676	O60936	NOL3_HUMAN	Nucleolar protein 3 OS=Homo sapiens GN=NOL3 PE=1 SV=1	22.629	1
1284	2.02	2.1	7.375	P78318	IGBP1_HUMAN	Immunoglobulin-binding protein 1 OS=Homo sapiens GN=IGBP1 PE=1 SV=1	39.222	2
1285	2.02	2.09	7.089	Q9NR46	SHLB2_HUMAN	Endophilin-B2 OS=Homo sapiens GN=SH3GLB2 PE=1 SV=1	43.974	2
1286	2.02	2.09	10.1	O95379	TFIP8_HUMAN	Tumor necrosis factor alpha-induced protein 8 OS=Homo sapiens GN=TNFAIP8 PE=2 SV=1	23.003	1
1287	2.02	2.07	5.882	P49257	LMAN1_HUMAN	Protein ERGIC-53 OS=Homo sapiens GN=LMAN1 PE=1 SV=2	57.549	2
1288	2.02	2.07	4.348	Q13148	TADBP_HUMAN	TAR DNA-binding protein 43 OS=Homo sapiens GN=TARDBP PE=1 SV=1	44.74	1
1289	2.02	2.07	3.789	P19474	RO52_HUMAN	E3 ubiquitin-protein ligase TRIM21 OS=Homo sapiens GN=TRIM21 PE=1 SV=1	54.17	2
1290	2.02	2.07	7.937	P62318	SMD3_HUMAN	Small nuclear ribonucleoprotein Sm D3 OS=Homo sapiens GN=SNRPD3 PE=1 SV=1	13.916	1
1291	2.02	2.06	2.179	Q8TCJ2	STT3B_HUMAN	Dolichyl-diphosphooligosaccharide--protein glycosyltransferase subunit STT3B OS=Homo sapiens GN=STT3B PE=1 SV=1	93.674	1
1292	2.02	2.06	3.14	Q13572	ITPK1_HUMAN	Inositol-tetrakisphosphate 1-kinase OS=Homo sapiens GN=ITPK1 PE=1 SV=2	45.621	1
1293	2.02	2.06	7.107	P12829	MYL4_HUMAN	Myosin light chain 4 OS=Homo sapiens GN=MYL4 PE=1 SV=3	21.565	2
1294	2.02	2.05	3.333	Q96EY1	DNJA3_HUMAN	DnaJ homolog subfamily A member 3, mitochondrial OS=Homo sapiens GN=DNAJA3 PE=1 SV=2	52.489	1
1295	2.02	2.05	6.468	Q8WUK0	PTPM1_HUMAN	Protein-tyrosine phosphatase mitochondrial 1 OS=Homo sapiens GN=PTPMT1 PE=1 SV=1	22.844	1
1296	2.02	2.04	1.911	Q96RF0	SNX18_HUMAN	Sorting nexin-18 OS=Homo sapiens GN=SNX18 PE=1 SV=2	68.894	1
1297	2.02	2.04	2.338	Q8N490	PNKD_HUMAN	Probable hydrolase PNKD OS=Homo sapiens GN=PNKD PE=1 SV=2	42.876	2
1298	2.02	2.04	2.532	O60488	ACSL4_HUMAN	Long-chain-fatty-acid--CoA ligase 4 OS=Homo sapiens GN=ACSL4 PE=1 SV=2	79.188	1
1299	2.02	2.04	9.659	Q9NYL9	TMOD3_HUMAN	Tropomodulin-3 OS=Homo sapiens GN=TMOD3 PE=1 SV=1	39.595	3
1300	2.02	2.03	18.1	O00217	NDUS8_HUMAN	NADH dehydrogenase [ubiquinone] iron-sulfur protein 8, mitochondrial OS=Homo sapiens GN=NDUFS8 PE=1 SV=1	23.705	3
1301	2.02	2.03	7.19	Q9NX14	NDUBB_HUMAN	NADH dehydrogenase [ubiquinone] 1 beta subcomplex subunit 11, mitochondrial OS=Homo sapiens GN=NDUFB11 PE=1 SV=1	17.317	1
1302	2.02	2.03	21.6	Q9UI30	TR112_HUMAN	tRNA methyltransferase 112 homolog OS=Homo sapiens GN=TRMT112 PE=1 SV=1	14.199	2
1303	2.02	2.02	3.333	O00115	DNS2A_HUMAN	Deoxyribonuclease-2-alpha OS=Homo sapiens GN=DNASE2 PE=1 SV=2	39.581	1
1304	2.02	2.02	7.627	P62316	SMD2_HUMAN	Small nuclear ribonucleoprotein Sm D2 OS=Homo sapiens GN=SNRPD2 PE=1 SV=1	13.527	1
1305	2.02	2.02	1.647	Q16576	RBBP7_HUMAN	Histone-binding protein RBBP7 OS=Homo sapiens GN=RBBP7 PE=1 SV=1	47.82	1
1306	2.02	2.02	6.25	P34910	EVI2B_HUMAN	Protein EVI2B OS=Homo sapiens GN=EVI2B PE=1 SV=2	48.666	2
1307	2.02	2.02	17.91	Q9NQP4	PFD4_HUMAN	Prefoldin subunit 4 OS=Homo sapiens GN=PFDN4 PE=1 SV=1	15.314	2
1308	2.01	4.28	6.19	O14979	HNRDL_HUMAN	Heterogeneous nuclear ribonucleoprotein D-like OS=Homo sapiens GN=HNRPDL PE=1 SV=3	46.438	1
1309	2.01	4.08	5.651	Q96EP5	DAZP1_HUMAN	DAZ-associated protein 1 OS=Homo sapiens GN=DAZAP1 PE=1 SV=1	43.383	1
1310	2.01	3.14	3.269	Q8N1N4	K2C78_HUMAN	Keratin, type II cytoskeletal 78 OS=Homo sapiens GN=KRT78 PE=2 SV=2	56.866	1
1311	2.01	2.7	6.178	O96011	PX11B_HUMAN	Peroxisomal membrane protein 11B OS=Homo sapiens GN=PEX11B PE=1 SV=1	28.431	2
1312	2.01	2.2	1.544	Q9NP81	SYSM_HUMAN	Serine--tRNA ligase, mitochondrial OS=Homo sapiens GN=SARS2 PE=1 SV=1	58.283	1
1313	2.01	2.2	1.775	Q8IWB9	TEX2_HUMAN	Testis-expressed sequence 2 protein OS=Homo sapiens GN=TEX2 PE=1 SV=2	125.303	1
1314	2.01	2.19	3.977	Q9H2V7	SPNS1_HUMAN	Protein spinster homolog 1 OS=Homo sapiens GN=SPNS1 PE=1 SV=1	56.63	2
1315	2.01	2.16	0.8307	Q15020	SART3_HUMAN	Squamous cell carcinoma antigen recognized by T-cells 3 OS=Homo sapiens GN=SART3 PE=1 SV=1	109.935	1
1316	2.01	2.15	0.9506	Q5XX13	FBW10_HUMAN	F-box/WD repeat-containing protein 10 OS=Homo sapiens GN=FBXW10 PE=2 SV=2	119.846	1
1317	2.01	2.11	5.87	Q9UJW0	DCTN4_HUMAN	Dynactin subunit 4 OS=Homo sapiens GN=DCTN4 PE=1 SV=1	52.337	2
1318	2.01	2.1	2.494	Q9BZV1	UBXN6_HUMAN	UBX domain-containing protein 6 OS=Homo sapiens GN=UBXN6 PE=1 SV=1	49.754	1
1319	2.01	2.09	1.292	Q9NSY1	BMP2K_HUMAN	BMP-2-inducible protein kinase OS=Homo sapiens GN=BMP2K PE=1 SV=2	129.172	1
1320	2.01	2.09	2.462	Q9H3P7	GCP60_HUMAN	Golgi resident protein GCP60 OS=Homo sapiens GN=ACBD3 PE=1 SV=4	60.593	1
1321	2.01	2.09	8.182	P62136	PP1A_HUMAN	Serine/threonine-protein phosphatase PP1-alpha catalytic subunit OS=Homo sapiens GN=PPP1CA PE=1 SV=1	37.512	2
1322	2.01	2.08	1.429	Q8WTW3	COG1_HUMAN	Conserved oligomeric Golgi complex subunit 1 OS=Homo sapiens GN=COG1 PE=1 SV=1	108.978	1
1323	2.01	2.08	3.333	P82650	RT22_HUMAN	28S ribosomal protein S22, mitochondrial OS=Homo sapiens GN=MRPS22 PE=1 SV=1	41.28	1
1324	2.01	2.07	4.7	Q96M96	FGD4_HUMAN	FYVE, RhoGEF and PH domain-containing protein 4 OS=Homo sapiens GN=FGD4 PE=1 SV=2	86.626	3
1325	2.01	2.07	4.134	Q92575	UBXN4_HUMAN	UBX domain-containing protein 4 OS=Homo sapiens GN=UBXN4 PE=1 SV=2	56.778	1
1326	2.01	2.07	5.725	Q96E11	RRFM_HUMAN	Ribosome-recycling factor, mitochondrial OS=Homo sapiens GN=MRRF PE=1 SV=1	29.277	1
1327	2.01	2.06	3.399	Q3ZCQ8	TIM50_HUMAN	Mitochondrial import inner membrane translocase subunit TIM50 OS=Homo sapiens GN=TIMM50 PE=1 SV=2	39.646	1
1328	2.01	2.06	1.461	Q9H074	PAIP1_HUMAN	Polyadenylate-binding protein-interacting protein 1 OS=Homo sapiens GN=PAIP1 PE=1 SV=1	53.525	1
1329	2.01	2.05	0.1289	P98164	LRP2_HUMAN	Low-density lipoprotein receptor-related protein 2 OS=Homo sapiens GN=LRP2 PE=1 SV=3	521.958	1
1330	2.01	2.05	3.947	P46108	CRK_HUMAN	Adapter molecule crk OS=Homo sapiens GN=CRK PE=1 SV=2	33.831	1
1331	2.01	2.05	2.687	Q9H0U3	MAGT1_HUMAN	Magnesium transporter protein 1 OS=Homo sapiens GN=MAGT1 PE=1 SV=1	38.037	1
1332	2.01	2.05	3.509	Q9Y508	RN114_HUMAN	RING finger protein 114 OS=Homo sapiens GN=RNF114 PE=1 SV=1	25.694	1
1333	2.01	2.05	6.117	Q9UNM6	PSD13_HUMAN	26S proteasome non-ATPase regulatory subunit 13 OS=Homo sapiens GN=PSMD13 PE=1 SV=2	42.945	2
1334	2.01	2.04	1.508	Q8N392	RHG18_HUMAN	Rho GTPase-activating protein 18 OS=Homo sapiens GN=ARHGAP18 PE=1 SV=3	74.977	1
1335	2.01	2.04	2.347	Q9UJY5	GGA1_HUMAN	ADP-ribosylation factor-binding protein GGA1 OS=Homo sapiens GN=GGA1 PE=1 SV=1	70.384	1
1336	2.01	2.03	2.614	Q93052	LPP_HUMAN	Lipoma-preferred partner OS=Homo sapiens GN=LPP PE=1 SV=1	65.746	1
1337	2.01	2.03	2.857	Q13643	FHL3_HUMAN	Four and a half LIM domains protein 3 OS=Homo sapiens GN=FHL3 PE=1 SV=4	31.192	1
1338	2.01	2.03	5.316	O75880	SCO1_HUMAN	Protein SCO1 homolog, mitochondrial OS=Homo sapiens GN=SCO1 PE=1 SV=1	33.814	1
1339	2.01	2.03	2.72	O43670	ZN207_HUMAN	Zinc finger protein 207 OS=Homo sapiens GN=ZNF207 PE=1 SV=1	50.751	1
1340	2.01	2.02	2.915	Q02338	BDH_HUMAN	D-beta-hydroxybutyrate dehydrogenase, mitochondrial OS=Homo sapiens GN=BDH1 PE=1 SV=3	38.157	1
1341	2.01	2.02	5.517	Q9Y5R8	TPPC1_HUMAN	Trafficking protein particle complex subunit 1 OS=Homo sapiens GN=TRAPPC1 PE=1 SV=1	16.832	1
1342	2.01	2.02	3.731	P53701	CCHL_HUMAN	Cytochrome c-type heme lyase OS=Homo sapiens GN=HCCS PE=1 SV=1	30.602	1
1343	2.01	2.01	2.769	O95340	PAPS2_HUMAN	Bifunctional 3'-phosphoadenosine 5'-phosphosulfate synthase 2 OS=Homo sapiens GN=PAPSS2 PE=1 SV=2	69.501	1
1344	2.01	2.01	1.892	Q8TB92	HMGC2_HUMAN	Probable 3-hydroxymethyl-3-methylglutaryl-CoA lyase 2 OS=Homo sapiens GN=HMGCLL1 PE=2 SV=3	39.514	1
1345	2.01	2.01	7.5	P51858	HDGF_HUMAN	Hepatoma-derived growth factor OS=Homo sapiens GN=HDGF PE=1 SV=1	26.788	2
1346	2.01	2.01	4.331	P08637	FCG3A_HUMAN	Low affinity immunoglobulin gamma Fc region receptor III-A OS=Homo sapiens GN=FCGR3A PE=1 SV=2	29.089	1
1347	2.01	2.01	2.36	O76071	CIAO1_HUMAN	Probable cytosolic iron-sulfur protein assembly protein CIAO1 OS=Homo sapiens GN=CIAO1 PE=1 SV=1	37.84	1

## Sheet: S2
N	Unused	Total	%Cov	%Cov(50)	%Cov(95)	Accessions	Names	Contrib	Conf	Sequence	Modifications	Cleavages	dMass	Prec MW	Prec m/z	Theor MW	Theor m/z	Theor z	Sc	Spectrum	Specific	Time	PrecursorSignal	PrecursorElution
1	207.11	207.11	59.16	33.84	27.69	sp|Q15149|PLEC_HUMAN	Plectin OS=Homo sapiens GN=PLEC PE=1 SV=3	2	99	AALAHSEEVTASQVAATK	iTRAQ8plex@N-term; iTRAQ8plex(K)@18		-0.00396964	2391.32	598.837	2391.32	598.838	4	16	2.1.1.490.12	0	18.6291	626.579	18.5421
1	207.11	207.11	59.16	33.84	27.69	sp|Q15149|PLEC_HUMAN	Plectin OS=Homo sapiens GN=PLEC PE=1 SV=3	2	99	AELELELGR	iTRAQ8plex@N-term		-0.00413235	1332.75	667.383	1332.76	667.385	2	10	20.1.1.1036.11	0	27.6818	219.444	27.7203
1	207.11	207.11	59.16	33.84	27.69	sp|Q15149|PLEC_HUMAN	Plectin OS=Homo sapiens GN=PLEC PE=1 SV=3	2	99	AGTLSITEFADMLSGNAGGFR	iTRAQ8plex@N-term; Deamidated(N)@16		0.0136692	2419.21	807.412	2419.2	807.407	3	20	3.1.1.977.11	0	43.8297	238.572	43.868
1	207.11	207.11	59.16	33.84	27.69	sp|Q15149|PLEC_HUMAN	Plectin OS=Homo sapiens GN=PLEC PE=1 SV=3	2	99	AIYEVLFR	iTRAQ8plex@N-term		-0.0133956	1313.75	657.883	1313.77	657.89	2	9	5.1.1.1507.8	1	37.3703	106.164	37.352
1	207.11	207.11	59.16	33.84	27.69	sp|Q15149|PLEC_HUMAN	Plectin OS=Homo sapiens GN=PLEC PE=1 SV=3	2	99	ALQALEELR	Formyl@N-term		-0.0057025	1069.57	535.793	1069.58	535.796	2	11	5.1.1.1490.2	0	36.3099	1256.58	36.3633
1	207.11	207.11	59.16	33.84	27.69	sp|Q15149|PLEC_HUMAN	Plectin OS=Homo sapiens GN=PLEC PE=1 SV=3	2	99	APVPASELLASGVLSR	iTRAQ8plex@N-term		-0.00596715	1870.08	624.366	1870.08	624.368	3	13	15.1.1.1963.7	1	43.2406	264.897	43.0382
1	207.11	207.11	59.16	33.84	27.69	sp|Q15149|PLEC_HUMAN	Plectin OS=Homo sapiens GN=PLEC PE=1 SV=3	2	99	AQAEAQQPTFDALRDELR	iTRAQ8plex@N-term	missed R-D@14	0.00404204	2362.22	788.415	2362.22	788.413	3	19	2.1.1.574.21	1	23.8092	1460.18	23.9544
1	207.11	207.11	59.16	33.84	27.69	sp|Q15149|PLEC_HUMAN	Plectin OS=Homo sapiens GN=PLEC PE=1 SV=3	2	99	AQQLREEQQR	Formyl@N-term	missed R-E@5	-0.00220286	1312.65	657.33	1312.65	657.331	2	13	4.1.1.853.31	0	7.0469	173.056	7.0519
1	207.11	207.11	59.16	33.84	27.69	sp|Q15149|PLEC_HUMAN	Plectin OS=Homo sapiens GN=PLEC PE=1 SV=3	2	99	AQVEQELTTLR	Formyl@N-term		-0.00117071	1314.68	658.346	1314.68	658.346	2	15	17.1.1.903.5	0	26.4996	412.52	26.4866
1	207.11	207.11	59.16	33.84	27.69	sp|Q15149|PLEC_HUMAN	Plectin OS=Homo sapiens GN=PLEC PE=1 SV=3	2	99	AYSDPSTGEPATYGELQQR	Formyl@N-term		0.012192	2096.94	1049.48	2096.93	1049.47	2	16	14.1.1.697.30	0	15.683	713.613	15.7499
1	207.11	207.11	59.16	33.84	27.69	sp|Q15149|PLEC_HUMAN	Plectin OS=Homo sapiens GN=PLEC PE=1 SV=3	2	99	DLSELGSVR	iTRAQ8plex@N-term		-0.00627506	1278.7	640.359	1278.71	640.362	2	13	3.1.1.552.21	1	17.6484	564.818	17.6701
1	207.11	207.11	59.16	33.84	27.69	sp|Q15149|PLEC_HUMAN	Plectin OS=Homo sapiens GN=PLEC PE=1 SV=3	2	99	DVAEVDTVRR	Formyl@N-term	missed R-R@9	0.00339789	1186.6	594.306	1186.59	594.304	2	12	7.1.1.1308.19	0	13.8478	342.762	13.8728
1	207.11	207.11	59.16	33.84	27.69	sp|Q15149|PLEC_HUMAN	Plectin OS=Homo sapiens GN=PLEC PE=1 SV=3	2	99	ELIPTEEALR	iTRAQ8plex@N-term		-0.00821635	1473.83	737.92	1473.83	737.925	2	12	3.1.1.621.16	1	21.8919	523.816	21.8607
1	207.11	207.11	59.16	33.84	27.69	sp|Q15149|PLEC_HUMAN	Plectin OS=Homo sapiens GN=PLEC PE=1 SV=3	2	99	EQELQQTLQQEQSVLDQLR	iTRAQ8plex@N-term		0.0166439	2616.38	873.135	2616.37	873.129	3	18	4.1.1.1345.21	1	37.3446	147.098	37.4282
1	207.11	207.11	59.16	33.84	27.69	sp|Q15149|PLEC_HUMAN	Plectin OS=Homo sapiens GN=PLEC PE=1 SV=3	2	99	EQELQQTLQQEQSVLDQLRGEAEAAR	Formyl@N-term	missed R-G@19	-0.00703885	3024.47	1009.16	3024.47	1009.17	3	15	5.1.1.1561.25	0	40.7406	422.418	40.6936
1	207.11	207.11	59.16	33.84	27.69	sp|Q15149|PLEC_HUMAN	Plectin OS=Homo sapiens GN=PLEC PE=1 SV=3	2	99	EQLRQEQALLEEIER	No iTRAQ8plex@N-term	missed R-Q@4	-0.0349977	1882.94	942.477	1882.97	942.495	2	14	14.1.1.1006.29	0	34.9103	342.39	34.9189
1	207.11	207.11	59.16	33.84	27.69	sp|Q15149|PLEC_HUMAN	Plectin OS=Homo sapiens GN=PLEC PE=1 SV=3	2	99	ESADPLGAWLQDAR	Formyl@N-term		-0.0013848	1555.73	778.87	1555.73	778.871	2	18	9.1.1.1837.15	0	37.1209	825.528	37.1526
1	207.11	207.11	59.16	33.84	27.69	sp|Q15149|PLEC_HUMAN	Plectin OS=Homo sapiens GN=PLEC PE=1 SV=3	2	99	FISETLR	iTRAQ8plex@N-term		-0.0121982	1168.66	585.339	1168.68	585.345	2	11	10.1.1.1589.22	1	23.642	1523.63	23.7239
1	207.11	207.11	59.16	33.84	27.69	sp|Q15149|PLEC_HUMAN	Plectin OS=Homo sapiens GN=PLEC PE=1 SV=3	2	99	FLEVQYLTGGLIEPDTPGR	Formyl@N-term		-0.00737401	2132.07	1067.04	2132.08	1067.05	2	13	2.1.1.935.28	0	46.1178	74.0624	46.0658
1	207.11	207.11	59.16	33.84	27.69	sp|Q15149|PLEC_HUMAN	Plectin OS=Homo sapiens GN=PLEC PE=1 SV=3	2	99	FLEVQYLTGGLIEPDTPGRVPLDEALQR	Formyl@N-term	missed R-V@19	0.0100688	3153.64	1052.22	3153.63	1052.22	3	21	2.1.1.937.27	0	46.2399	864.559	46.3136
1	207.11	207.11	59.16	33.84	27.69	sp|Q15149|PLEC_HUMAN	Plectin OS=Homo sapiens GN=PLEC PE=1 SV=3	2	99	GCLDEETSR	iTRAQ8plex@N-term; Methylthio(C)@2		-0.00117161	1358.61	680.312	1358.61	680.313	2	13	17.1.1.726.26	1	15.5137	406.502	15.4034
1	207.11	207.11	59.16	33.84	27.69	sp|Q15149|PLEC_HUMAN	Plectin OS=Homo sapiens GN=PLEC PE=1 SV=3	2	99	GFFDPNTHENLTYR	Formyl@N-term		-0.0030996	1737.77	869.893	1737.77	869.895	2	18	8.1.1.1736.29	0	25.7521	1037.72	25.7605
1	207.11	207.11	59.16	33.84	27.69	sp|Q15149|PLEC_HUMAN	Plectin OS=Homo sapiens GN=PLEC PE=1 SV=3	2	99	GGAEGELQALR	Formyl@N-term		0.00524558	1127.56	564.788	1127.56	564.786	2	15	12.1.1.738.5	0	18.5749	933.739	18.5617
1	207.11	207.11	59.16	33.84	27.69	sp|Q15149|PLEC_HUMAN	Plectin OS=Homo sapiens GN=PLEC PE=1 SV=3	2	99	GLFDEEMNEILTDPSDDTK	iTRAQ8plex@N-term; iTRAQ8plex(K)@19		0.037485	2776.39	926.472	2776.36	926.46	3	18	4.1.1.1288.25	1	33.8282	174.568	33.8433
1	207.11	207.11	59.16	33.84	27.69	sp|Q15149|PLEC_HUMAN	Plectin OS=Homo sapiens GN=PLEC PE=1 SV=3	2	99	GLHQSIEEFR	Formyl@N-term		-0.000792994	1242.6	622.307	1242.6	622.307	2	16	2.1.1.474.17	0	17.6488	2742.5	17.6153
1	207.11	207.11	59.16	33.84	27.69	sp|Q15149|PLEC_HUMAN	Plectin OS=Homo sapiens GN=PLEC PE=1 SV=3	2	99	GLLSAEVAR	iTRAQ8plex@N-term		0.00547564	1218.73	610.372	1218.72	610.369	2	16	6.1.1.1103.20	1	20.3857	175.458	20.3478
1	207.11	207.11	59.16	33.84	27.69	sp|Q15149|PLEC_HUMAN	Plectin OS=Homo sapiens GN=PLEC PE=1 SV=3	2	99	GLVEDTLR	iTRAQ8plex@N-term		-0.00294188	1205.69	603.852	1205.69	603.853	2	14	2.1.1.474.16	1	17.6471	1639.24	17.6771
1	207.11	207.11	59.16	33.84	27.69	sp|Q15149|PLEC_HUMAN	Plectin OS=Homo sapiens GN=PLEC PE=1 SV=3	2	99	GYFSEEMNR	iTRAQ8plex@N-term		0.015696	1435.69	718.851	1435.67	718.843	2	12	2.1.1.427.30	1	14.7681	690.526	14.7135
1	207.11	207.11	59.16	33.84	27.69	sp|Q15149|PLEC_HUMAN	Plectin OS=Homo sapiens GN=PLEC PE=1 SV=3	2	99	GYYSPYSVSGSGSTAGSR	iTRAQ8plex@N-term		0.0172993	2086.01	696.343	2085.99	696.338	3	19	3.1.1.476.29	1	12.9839	287.238	12.9304
1	207.11	207.11	59.16	33.84	27.69	sp|Q15149|PLEC_HUMAN	Plectin OS=Homo sapiens GN=PLEC PE=1 SV=3	2	99	IISLETYNLLR	iTRAQ8plex@N-term		0.000943448	1637.97	546.996	1637.97	546.996	3	12	3.1.1.869.3	1	37.1574	131.989	37.271
1	207.11	207.11	59.16	33.84	27.69	sp|Q15149|PLEC_HUMAN	Plectin OS=Homo sapiens GN=PLEC PE=1 SV=3	2	99	LAAEQELIR	iTRAQ8plex@N-term		-0.0052527	1345.78	673.898	1345.79	673.901	2	16	2.1.1.546.21	1	22.0855	2163.35	22.1071
1	207.11	207.11	59.16	33.84	27.69	sp|Q15149|PLEC_HUMAN	Plectin OS=Homo sapiens GN=PLEC PE=1 SV=3	2	99	LAAIGEATR	iTRAQ8plex@N-term		-0.0076936	1204.7	603.357	1204.71	603.361	2	15	9.1.1.1590.18	1	21.8788	1089.74	21.9673
1	207.11	207.11	59.16	33.84	27.69	sp|Q15149|PLEC_HUMAN	Plectin OS=Homo sapiens GN=PLEC PE=1 SV=3	2	99	LAEVEAALEK	Formyl@N-term; iTRAQ8plex(K)@10		-0.00612603	1403.78	702.895	1403.78	702.898	2	12	2.1.1.768.6	0	35.7464	508.885	35.4849
1	207.11	207.11	59.16	33.84	27.69	sp|Q15149|PLEC_HUMAN	Plectin OS=Homo sapiens GN=PLEC PE=1 SV=3	2	99	LAQGHTTVDELAR	iTRAQ8plex@N-term		0.00352322	1713.94	572.319	1713.93	572.318	3	14	2.1.1.443.25	1	15.7479	1441.44	15.6404
1	207.11	207.11	59.16	33.84	27.69	sp|Q15149|PLEC_HUMAN	Plectin OS=Homo sapiens GN=PLEC PE=1 SV=3	2	99	LGFHLPLEVAYQR	Formyl@N-term		0.000898935	1569.83	785.923	1569.83	785.922	2	17	4.1.1.1370.15	0	38.8813	2127.18	38.6655
1	207.11	207.11	59.16	33.84	27.69	sp|Q15149|PLEC_HUMAN	Plectin OS=Homo sapiens GN=PLEC PE=1 SV=3	2	99	LLDAQLATGGIVDPR	Formyl@N-term		0.00119952	1565.84	783.928	1565.84	783.928	2	14	11.1.1.1817.20	0	38.7004	525.118	38.4768
1	207.11	207.11	59.16	33.84	27.69	sp|Q15149|PLEC_HUMAN	Plectin OS=Homo sapiens GN=PLEC PE=1 SV=3	2	99	LLEAAAQSTK	iTRAQ8plex@N-term; iTRAQ8plex(K)@10		-0.00885063	1638.97	547.33	1638.98	547.333	3	13	10.1.1.1586.19	1	23.4515	286.726	23.4149
1	207.11	207.11	59.16	33.84	27.69	sp|Q15149|PLEC_HUMAN	Plectin OS=Homo sapiens GN=PLEC PE=1 SV=3	2	99	LQEAGILSAEELQR	Formyl@N-term		-0.00389255	1583.81	792.913	1583.82	792.915	2	17	4.1.1.1240.19	0	30.8577	2176.68	31.0061
1	207.11	207.11	59.16	33.84	27.69	sp|Q15149|PLEC_HUMAN	Plectin OS=Homo sapiens GN=PLEC PE=1 SV=3	2	99	LQLEACETR	iTRAQ8plex@N-term; Methylthio(C)@6		-0.00189545	1411.71	706.862	1411.71	706.863	2	13	6.1.1.1168.25	1	24.4014	269.29	24.3548
1	207.11	207.11	59.16	33.84	27.69	sp|Q15149|PLEC_HUMAN	Plectin OS=Homo sapiens GN=PLEC PE=1 SV=3	2	99	LQLEATER	iTRAQ8plex@N-term		-0.00454112	1262.71	632.362	1262.71	632.364	2	12	20.1.1.849.18	1	16.0897	1159.64	15.9919
1	207.11	207.11	59.16	33.84	27.69	sp|Q15149|PLEC_HUMAN	Plectin OS=Homo sapiens GN=PLEC PE=1 SV=3	2	99	LQNVQIALDYLR	Formyl@N-term		-0.0017443	1472.8	737.406	1472.8	737.407	2	12	2.1.1.877.11	0	42.4898	207.994	42.5901
1	207.11	207.11	59.16	33.84	27.69	sp|Q15149|PLEC_HUMAN	Plectin OS=Homo sapiens GN=PLEC PE=1 SV=3	2	99	LREQLQLLEEQHR	Formyl@N-term	missed R-E@2	0.000862148	1718.91	573.976	1718.91	573.976	3	18	7.1.1.1527.11	0	27.3145	1422.19	27.3529
1	207.11	207.11	59.16	33.84	27.69	sp|Q15149|PLEC_HUMAN	Plectin OS=Homo sapiens GN=PLEC PE=1 SV=3	2	99	LRQLAEEDLAQQR	iTRAQ8plex@N-term	missed R-Q@2	0.019339	1873.05	625.358	1873.03	625.351	3	12	3.1.1.617.11	1	21.6389	320.932	21.6162
1	207.11	207.11	59.16	33.84	27.69	sp|Q15149|PLEC_HUMAN	Plectin OS=Homo sapiens GN=PLEC PE=1 SV=3	2	99	LSVAAQEAAR	iTRAQ8plex@N-term		-0.00173	1318.75	660.382	1318.75	660.383	2	18	2.1.1.432.26	1	15.0701	2147.4	15.0834
1	207.11	207.11	59.16	33.84	27.69	sp|Q15149|PLEC_HUMAN	Plectin OS=Homo sapiens GN=PLEC PE=1 SV=3	2	99	LTVDEAVR	iTRAQ8plex@N-term		-0.00457683	1205.69	603.851	1205.69	603.853	2	13	18.1.1.893.15	1	22.7601	826.212	22.8544
1	207.11	207.11	59.16	33.84	27.69	sp|Q15149|PLEC_HUMAN	Plectin OS=Homo sapiens GN=PLEC PE=1 SV=3	2	99	LVASMEEAR	iTRAQ8plex@N-term		-0.00425843	1308.7	655.356	1308.7	655.358	2	16	4.1.1.1061.21	1	19.8345	1503.21	19.8562
1	207.11	207.11	59.16	33.84	27.69	sp|Q15149|PLEC_HUMAN	Plectin OS=Homo sapiens GN=PLEC PE=1 SV=3	2	99	MQAVQEATR	iTRAQ8plex@N-term		-0.00479766	1336.7	669.359	1336.71	669.361	2	16	3.1.1.499.30	1	14.4003	1872.03	14.407
1	207.11	207.11	59.16	33.84	27.69	sp|Q15149|PLEC_HUMAN	Plectin OS=Homo sapiens GN=PLEC PE=1 SV=3	2	99	MVEGYQGLR	iTRAQ8plex@N-term		0.00562094	1355.72	678.869	1355.72	678.866	2	15	4.1.1.1004.30	1	16.3348	458.677	16.3415
1	207.11	207.11	59.16	33.84	27.69	sp|Q15149|PLEC_HUMAN	Plectin OS=Homo sapiens GN=PLEC PE=1 SV=3	2	99	NLLDEELQR	iTRAQ8plex@N-term		-0.0104728	1432.77	717.394	1432.78	717.399	2	11	20.1.1.985.19	1	24.5384	210.208	24.5637
1	207.11	207.11	59.16	33.84	27.69	sp|Q15149|PLEC_HUMAN	Plectin OS=Homo sapiens GN=PLEC PE=1 SV=3	2	99	NLVDNITGQR	iTRAQ8plex@N-term		-0.00161525	1432.79	717.404	1432.79	717.404	2	16	7.1.1.1410.30	1	20.1445	914.066	20.0893
1	207.11	207.11	59.16	33.84	27.69	sp|Q15149|PLEC_HUMAN	Plectin OS=Homo sapiens GN=PLEC PE=1 SV=3	2	99	QLLEEELAR	iTRAQ8plex@N-term		-0.00166732	1403.79	702.903	1403.79	702.904	2	13	20.1.1.1014.11	1	26.3274	311.892	26.3035
1	207.11	207.11	59.16	33.84	27.69	sp|Q15149|PLEC_HUMAN	Plectin OS=Homo sapiens GN=PLEC PE=1 SV=3	2	99	QQEELLAEENQR	Gln->pyro-Glu@N-term		0.0006989	1468.68	735.347	1468.68	735.347	2	15	8.1.1.1608.30	0	17.8629	305.91	17.8696
1	207.11	207.11	59.16	33.84	27.69	sp|Q15149|PLEC_HUMAN	Plectin OS=Homo sapiens GN=PLEC PE=1 SV=3	2	99	QRELEQLGR	Gln->pyro-Glu@N-term	missed R-E@2	0.0192389	1110.6	556.306	1110.58	556.296	2	12	17.1.1.746.13	0	16.7341	720.236	17.2064
1	207.11	207.11	59.16	33.84	27.69	sp|Q15149|PLEC_HUMAN	Plectin OS=Homo sapiens GN=PLEC PE=1 SV=3	2	99	QTNLENLDQAFSVAER	Gln->pyro-Glu@N-term		0.00191722	1816.86	909.438	1816.86	909.437	2	18	5.1.1.1445.26	0	33.5784	667.148	33.53
1	207.11	207.11	59.16	33.84	27.69	sp|Q15149|PLEC_HUMAN	Plectin OS=Homo sapiens GN=PLEC PE=1 SV=3	2	99	QVEEEILALK	Gln->pyro-Glu@N-term; iTRAQ8plex(K)@10		0.000881886	1457.83	729.922	1457.83	729.922	2	13	2.1.1.709.22	1	32.1375	449.321	32.0957
1	207.11	207.11	59.16	33.84	27.69	sp|Q15149|PLEC_HUMAN	Plectin OS=Homo sapiens GN=PLEC PE=1 SV=3	2	99	QVQVALETAQR	iTRAQ8plex@N-term		-0.000165389	1545.88	516.3	1545.88	516.3	3	17	5.1.1.1211.15	1	19.1409	1270.98	19.1108
1	207.11	207.11	59.16	33.84	27.69	sp|Q15149|PLEC_HUMAN	Plectin OS=Homo sapiens GN=PLEC PE=1 SV=3	2	99	RAQAEQAALR	Formyl@N-term	missed R-A@1	-0.00417272	1140.6	571.305	1140.6	571.307	2	17	7.1.1.1228.27	0	9.0361	658.982	9.0478
1	207.11	207.11	59.16	33.84	27.69	sp|Q15149|PLEC_HUMAN	Plectin OS=Homo sapiens GN=PLEC PE=1 SV=3	2	99	RDDGTGQLLLPLSDAR	Formyl@N-term	missed R-D@1	-0.00167752	1753.89	877.954	1753.9	877.955	2	22	7.1.1.1567.28	0	29.8081	425.107	29.8181
1	207.11	207.11	59.16	33.84	27.69	sp|Q15149|PLEC_HUMAN	Plectin OS=Homo sapiens GN=PLEC PE=1 SV=3	2	99	RLAEDEAFQR	Formyl@N-term	missed R-L@1	0.00212963	1261.61	631.811	1261.61	631.81	2	16	10.1.1.1443.26	0	14.6521	793.143	14.6654
1	207.11	207.11	59.16	33.84	27.69	sp|Q15149|PLEC_HUMAN	Plectin OS=Homo sapiens GN=PLEC PE=1 SV=3	2	99	RLTAEDLFEAR	iTRAQ8plex@N-term	missed R-L@1	-0.0126391	1623.88	542.299	1623.89	542.304	3	10	7.1.1.1490.11	1	25.0301	324.19	25.0685
1	207.11	207.11	59.16	33.84	27.69	sp|Q15149|PLEC_HUMAN	Plectin OS=Homo sapiens GN=PLEC PE=1 SV=3	2	99	RPELEDSTLR	Formyl@N-term		-0.00406413	1242.62	622.315	1242.62	622.318	2	17	10.1.1.1446.20	0	14.8273	731.126	14.7889
1	207.11	207.11	59.16	33.84	27.69	sp|Q15149|PLEC_HUMAN	Plectin OS=Homo sapiens GN=PLEC PE=1 SV=3	2	99	SDEGQLSPATR	iTRAQ8plex@N-term		0.00231013	1463.75	732.885	1463.75	732.883	2	17	9.1.1.1393.31	1	9.7563	161.262	9.7002
1	207.11	207.11	59.16	33.84	27.69	sp|Q15149|PLEC_HUMAN	Plectin OS=Homo sapiens GN=PLEC PE=1 SV=3	2	99	SELELTLGKLEQVR	Formyl@N-term; iTRAQ8plex(K)@9	missed K-L@9	0.0248864	1946.12	649.715	1946.1	649.707	3	15	9.1.1.1843.4	0	37.4737	196.001	37.4618
1	207.11	207.11	59.16	33.84	27.69	sp|Q15149|PLEC_HUMAN	Plectin OS=Homo sapiens GN=PLEC PE=1 SV=3	2	99	SHRVPLDVACAR	Formyl@N-term; Methylthio(C)@10	missed R-V@3	0.00529022	1396.68	466.566	1396.67	466.564	3	17	8.1.1.1659.6	0	20.9653	884.942	21.0119
1	207.11	207.11	59.16	33.84	27.69	sp|Q15149|PLEC_HUMAN	Plectin OS=Homo sapiens GN=PLEC PE=1 SV=3	2	99	SIITYVSSLYDAMPR	Formyl@N-term		0.0137702	1742.87	872.442	1742.85	872.435	2	18	10.1.1.1971.15	0	47.2303	522.873	47.1997
1	207.11	207.11	59.16	33.84	27.69	sp|Q15149|PLEC_HUMAN	Plectin OS=Homo sapiens GN=PLEC PE=1 SV=3	2	99	SIQEELQQLR	iTRAQ8plex@N-term		-0.00998222	1546.85	774.433	1546.86	774.438	2	18	3.1.1.656.19	1	24.0581	1173.55	24.2068
1	207.11	207.11	59.16	33.84	27.69	sp|Q15149|PLEC_HUMAN	Plectin OS=Homo sapiens GN=PLEC PE=1 SV=3	2	99	SKEQAELEAAR	Formyl@N-term; iTRAQ8plex(K)@2	missed K-E@2	-0.0029385	1562.82	782.416	1562.82	782.418	2	18	8.1.1.1529.13	0	13.0153	545.355	12.9593
1	207.11	207.11	59.16	33.84	27.69	sp|Q15149|PLEC_HUMAN	Plectin OS=Homo sapiens GN=PLEC PE=1 SV=3	2	99	SLAAEEEAAR	iTRAQ8plex@N-term		-0.00796596	1349.7	675.858	1349.71	675.862	2	17	10.1.1.1402.26	1	12.1224	697.998	12.1357
1	207.11	207.11	59.16	33.84	27.69	sp|Q15149|PLEC_HUMAN	Plectin OS=Homo sapiens GN=PLEC PE=1 SV=3	2	99	SLQEEHVAVAQLR	Formyl@N-term		0.00522508	1506.78	754.399	1506.78	754.397	2	17	19.1.1.921.21	0	22.7566	297.339	22.7786
1	207.11	207.11	59.16	33.84	27.69	sp|Q15149|PLEC_HUMAN	Plectin OS=Homo sapiens GN=PLEC PE=1 SV=3	2	99	SLVPAAELLESR	Formyl@N-term		-0.00292095	1311.7	656.857	1311.7	656.859	2	13	9.1.1.1838.5	0	37.1661	1980.42	37.2763
1	207.11	207.11	59.16	33.84	27.69	sp|Q15149|PLEC_HUMAN	Plectin OS=Homo sapiens GN=PLEC PE=1 SV=3	2	99	SMIIDR	iTRAQ8plex@N-term		-0.00193148	1037.58	519.799	1037.58	519.8	2	10	3.1.1.481.19	1	13.2735	520.207	13.2985
1	207.11	207.11	59.16	33.84	27.69	sp|Q15149|PLEC_HUMAN	Plectin OS=Homo sapiens GN=PLEC PE=1 SV=3	2	99	SQVEEELFSVR	iTRAQ8plex@N-term		-0.00436184	1625.85	813.933	1625.86	813.936	2	17	2.1.1.615.15	1	26.3466	1484.71	26.3584
1	207.11	207.11	59.16	33.84	27.69	sp|Q15149|PLEC_HUMAN	Plectin OS=Homo sapiens GN=PLEC PE=1 SV=3	2	99	SQVMDEATALQLR	iTRAQ8plex@N-term		0.0087827	1764.94	589.322	1764.93	589.319	3	15	4.1.1.1136.9	1	24.4259	621.148	24.5295
1	207.11	207.11	59.16	33.84	27.69	sp|Q15149|PLEC_HUMAN	Plectin OS=Homo sapiens GN=PLEC PE=1 SV=3	2	99	SSSVGSSSSYPISPAVSR	iTRAQ8plex@N-term		0.0114834	2058.07	687.029	2058.05	687.025	3	22	2.1.1.434.29	1	15.199	1096.75	15.1453
1	207.11	207.11	59.16	33.84	27.69	sp|Q15149|PLEC_HUMAN	Plectin OS=Homo sapiens GN=PLEC PE=1 SV=3	2	99	VAQLLER	iTRAQ8plex@N-term		-0.00106658	1131.69	566.853	1131.69	566.853	2	11	10.1.1.1619.13	0	25.4802	1726.68	25.6388
1	207.11	207.11	59.16	33.84	27.69	sp|Q15149|PLEC_HUMAN	Plectin OS=Homo sapiens GN=PLEC PE=1 SV=3	2	99	VDGAEWGVDLPSVEAQLGSHR	Formyl@N-term		0.00223468	2249.07	750.698	2249.07	750.698	3	15	9.1.1.1810.12	0	35.4457	106.19	35.4206
1	207.11	207.11	59.16	33.84	27.69	sp|Q15149|PLEC_HUMAN	Plectin OS=Homo sapiens GN=PLEC PE=1 SV=3	2	99	VIDRELYQQLQR	Formyl@N-term	missed R-E@4	-0.00899154	1587.83	794.921	1587.84	794.926	2	18	7.1.1.1542.25	0	28.2645	1558.56	28.156
1	207.11	207.11	59.16	33.84	27.69	sp|Q15149|PLEC_HUMAN	Plectin OS=Homo sapiens GN=PLEC PE=1 SV=3	2	99	VLALPEPSPAAPTLR	Formyl@N-term		-0.00245843	1558.87	780.442	1558.87	780.443	2	14	11.1.1.1787.23	0	36.8527	707.984	36.8711
1	207.11	207.11	59.16	33.84	27.69	sp|Q15149|PLEC_HUMAN	Plectin OS=Homo sapiens GN=PLEC PE=1 SV=3	2	99	VQSGSESVIQEYVDLR	iTRAQ8plex@N-term		0.00606667	2112.11	705.043	2112.1	705.041	3	19	5.1.1.1388.4	1	30.0369	479.293	30.0209
1	207.11	207.11	59.16	33.84	27.69	sp|Q15149|PLEC_HUMAN	Plectin OS=Homo sapiens GN=PLEC PE=1 SV=3	2	99	VSITEAMHR	iTRAQ8plex@N-term		-0.0025854	1346.73	449.916	1346.73	449.917	3	15	6.1.1.1064.7	1	17.9642	183.439	18.0093
1	207.11	207.11	59.16	33.84	27.69	sp|Q15149|PLEC_HUMAN	Plectin OS=Homo sapiens GN=PLEC PE=1 SV=3	2	99	VSIYEAMR	iTRAQ8plex@N-term		-0.00698702	1271.68	636.846	1271.69	636.85	2	12	9.1.1.1597.24	1	22.3191	488.728	22.2745
1	207.11	207.11	59.16	33.84	27.69	sp|Q15149|PLEC_HUMAN	Plectin OS=Homo sapiens GN=PLEC PE=1 SV=3	1.92082	99	SNAEDTLR	iTRAQ8plex@N-term		-0.0101071	1208.62	605.317	1208.63	605.322	2	13	8.1.1.1477.25	1	9.8077	457.374	10.0068
1	207.11	207.11	59.16	33.84	27.69	sp|Q15149|PLEC_HUMAN	Plectin OS=Homo sapiens GN=PLEC PE=1 SV=3	1.88606	99	LTVEEAVR	iTRAQ8plex@N-term		-0.00308998	1219.7	610.86	1219.71	610.861	2	12	19.1.1.925.10	0	22.9867	500.295	23.0888
1	207.11	207.11	59.16	33.84	27.69	sp|Q15149|PLEC_HUMAN	Plectin OS=Homo sapiens GN=PLEC PE=1 SV=3	1.67778	99	SALDQYR	iTRAQ8plex@N-term		-0.00169386	1155.62	578.816	1155.62	578.817	2	12	19.1.1.760.27	1	12.7622	598.248	12.6505
1	207.11	207.11	59.16	33.84	27.69	sp|Q15149|PLEC_HUMAN	Plectin OS=Homo sapiens GN=PLEC PE=1 SV=3	1.46852	99	DVAEVDTVR	iTRAQ8plex@N-term		-0.00494453	1306.7	654.357	1306.7	654.359	2	13	9.1.1.1469.20	1	14.4117	162.439	14.3735
1	207.11	207.11	59.16	33.84	27.69	sp|Q15149|PLEC_HUMAN	Plectin OS=Homo sapiens GN=PLEC PE=1 SV=3	1.4437	99	QRGGAEGELQALR	Gln->pyro-Glu@N-term	missed R-G@2	-0.00515213	1366.69	684.352	1366.7	684.355	2	14	11.1.1.1553.19	0	22.4241	194.02	22.4491
1	207.11	207.11	59.16	33.84	27.69	sp|Q15149|PLEC_HUMAN	Plectin OS=Homo sapiens GN=PLEC PE=1 SV=3	1.40894	99	QLAEEDAAR	iTRAQ8plex@N-term		-0.00244564	1305.68	653.848	1305.68	653.849	2	12	8.1.1.1490.27	1	10.61	185.814	10.56
1	207.11	207.11	59.16	33.84	27.69	sp|Q15149|PLEC_HUMAN	Plectin OS=Homo sapiens GN=PLEC PE=1 SV=3	1.1549	99	QKAQVEQELTTLR	Gln->pyro-Glu@N-term; iTRAQ8plex(K)@2	missed K-A@2	-0.0198997	1830	611.006	1830.02	611.012	3	12	19.1.1.1046.12	1	30.5257	93.1687	30.4379
1	207.11	207.11	59.16	33.84	27.69	sp|Q15149|PLEC_HUMAN	Plectin OS=Homo sapiens GN=PLEC PE=1 SV=3	0.673664	99	QLAEEDLAQQR	iTRAQ8plex@N-term		0.996763	1604.84	535.955	1603.85	535.623	3	14	13.1.1.1577.12	0	22.0823	143.275	22.0571
1	207.11	207.11	59.16	33.84	27.69	sp|Q15149|PLEC_HUMAN	Plectin OS=Homo sapiens GN=PLEC PE=1 SV=3	0.581699	99	RQQEELLAEENQR	Formyl@N-term	missed R-Q@1	0.00409781	1669.81	835.91	1669.8	835.908	2	12	7.1.1.1316.31	0	14.3602	120.541	14.3038
1	207.11	207.11	59.16	33.84	27.69	sp|Q15149|PLEC_HUMAN	Plectin OS=Homo sapiens GN=PLEC PE=1 SV=3	0.102373	99	FRELAEEAAR	Formyl@N-term	missed R-E@2	0.0016853	1218.6	610.308	1218.6	610.307	2	16	2.1.1.534.15	0	21.3345	1506.41	21.3662
1	207.11	207.11	59.16	33.84	27.69	sp|Q15149|PLEC_HUMAN	Plectin OS=Homo sapiens GN=PLEC PE=1 SV=3	0.102373	99	LSFSGLRAPVPASELLASGVLSR	Formyl@N-term	missed R-A@7	0.00386036	2354.3	785.774	2354.3	785.773	3	21	7.1.1.1808.12	0	44.6578	301.121	44.7563
1	207.11	207.11	59.16	33.84	27.69	sp|Q15149|PLEC_HUMAN	Plectin OS=Homo sapiens GN=PLEC PE=1 SV=3	0.033389	99	LQAEEVAQQK	Formyl@N-term; iTRAQ8plex(K)@10		-0.00180192	1474.79	738.403	1474.79	738.404	2	13	13.1.1.1518.29	0	18.4623	609.682	18.3479
1	207.11	207.11	59.16	33.84	27.69	sp|Q15149|PLEC_HUMAN	Plectin OS=Homo sapiens GN=PLEC PE=1 SV=3	0.0273344	99	LSVYAALQR	Formyl@N-term		-0.000199711	1047.57	524.793	1047.57	524.793	2	12	17.1.1.974.9	0	30.9126	366.55	30.83
1	207.11	207.11	59.16	33.84	27.69	sp|Q15149|PLEC_HUMAN	Plectin OS=Homo sapiens GN=PLEC PE=1 SV=3	0.02365	99	LISLFQAMK	Formyl@N-term; iTRAQ8plex(K)@9		-0.00731265	1381.79	691.901	1381.79	691.905	2	13	12.1.1.1196.4	0	47.0535	705.728	47.0419
1	207.11	207.11	59.16	33.84	27.69	sp|Q15149|PLEC_HUMAN	Plectin OS=Homo sapiens GN=PLEC PE=1 SV=3	0.02365	99	TQLASWSDPTEETGPVAGILDTETLEK	Formyl@N-term; iTRAQ8plex(K)@27		-0.00407236	3219.59	1074.2	3219.6	1074.21	3	15	6.1.1.1424.27	0	40.2124	234.827	40.286
1	207.11	207.11	59.16	33.84	27.69	sp|Q15149|PLEC_HUMAN	Plectin OS=Homo sapiens GN=PLEC PE=1 SV=3	0.0195421	99	GFFDPNTEENLTYLQLMER	Formyl@N-term		0.0103676	2344.08	1173.05	2344.07	1173.04	2	13	14.1.1.1118.30	0	41.8855	193.897	41.9547
1	207.11	207.11	59.16	33.84	27.69	sp|Q15149|PLEC_HUMAN	Plectin OS=Homo sapiens GN=PLEC PE=1 SV=3	0.0163737	99	LRIEEEIR	Formyl@N-term	missed R-I@2	-0.00235728	1084.59	543.3	1084.59	543.301	2	11	17.1.1.928.9	0	28.0531	94.7652	28.0332
1	207.11	207.11	59.16	33.84	27.69	sp|Q15149|PLEC_HUMAN	Plectin OS=Homo sapiens GN=PLEC PE=1 SV=3	0.0145735	99	DALDGPAAEAEPEHSFDGLR	Formyl@N-term		0.00833979	2123.95	1062.98	2123.94	1062.98	2	13	16.1.1.889.31	0	25.639	120.479	25.5819
1	207.11	207.11	59.16	33.84	27.69	sp|Q15149|PLEC_HUMAN	Plectin OS=Homo sapiens GN=PLEC PE=1 SV=3	0.0101054	98.84	GFFDPNTHENLTYLQLLER	Formyl@N-term		0.0145759	2334.14	779.055	2334.13	779.05	3	12	19.1.1.1297.9	0	46.1565	288.974	46.1984
1	207.11	207.11	59.16	33.84	27.69	sp|Q15149|PLEC_HUMAN	Plectin OS=Homo sapiens GN=PLEC PE=1 SV=3	0.0070049	98.84	SLESLHSFVAAATK	Formyl@N-term; iTRAQ8plex(K)@14		-0.00746712	1791.96	598.327	1791.97	598.33	3	13	3.1.1.784.3	0	31.9163	222.212	31.8444
1	207.11	207.11	59.16	33.84	27.69	sp|Q15149|PLEC_HUMAN	Plectin OS=Homo sapiens GN=PLEC PE=1 SV=3	0.00568285	98.67	SLSAIYLEK	Formyl@N-term; iTRAQ8plex(K)@9		-0.00493768	1354.76	678.387	1354.77	678.39	2	11	9.1.1.1714.18	0	29.5275	435.511	29.2452
1	207.11	207.11	59.16	33.84	27.69	sp|Q15149|PLEC_HUMAN	Plectin OS=Homo sapiens GN=PLEC PE=1 SV=3	1.07572	98.64	LQAEEAER	iTRAQ8plex@N-term		-0.00502132	1248.66	625.336	1248.66	625.338	2	12	9.1.1.1406.28	1	10.5512	372.314	10.5613
1	207.11	207.11	59.16	33.84	27.69	sp|Q15149|PLEC_HUMAN	Plectin OS=Homo sapiens GN=PLEC PE=1 SV=3	0.00568285	98.24	VTLVQTLEIQR	Formyl@N-term		0.00121971	1326.75	664.383	1326.75	664.383	2	11	12.1.1.1021.10	0	36.1807	673.852	35.6599
1	207.11	207.11	59.16	33.84	27.69	sp|Q15149|PLEC_HUMAN	Plectin OS=Homo sapiens GN=PLEC PE=1 SV=3	0.00348833	97.85	QAEVELASR	Formyl@N-term		-0.0056967	1029.5	515.759	1029.51	515.762	2	12	8.1.1.1570.12	0	15.4957	709.08	15.5942
1	207.11	207.11	59.16	33.84	27.69	sp|Q15149|PLEC_HUMAN	Plectin OS=Homo sapiens GN=PLEC PE=1 SV=3	0.00612309	97.66	DDGTGQLLLPLSDAR	iTRAQ8plex@N-term		-0.993004	1873.01	625.345	1874.01	625.676	3	13	7.1.1.1569.13	0	29.9066	145.456	29.8799
1	207.11	207.11	59.16	33.84	27.69	sp|Q15149|PLEC_HUMAN	Plectin OS=Homo sapiens GN=PLEC PE=1 SV=3	0.00436481	97.62	QLQLAQEAAQK	Formyl@N-term; iTRAQ8plex(K)@11		0.00247063	1558.86	780.44	1558.86	780.438	2	12	20.1.1.889.25	0	18.5859	149.873	18.5388
1	207.11	207.11	59.16	33.84	27.69	sp|Q15149|PLEC_HUMAN	Plectin OS=Homo sapiens GN=PLEC PE=1 SV=3	0.00348833	97.31	ARQEELYSELQAR	Formyl@N-term	missed R-Q@2	-0.00573248	1619.78	540.936	1619.79	540.937	3	11	17.1.1.832.6	0	22.0861	192.991	22.0707
1	207.11	207.11	59.16	33.84	27.69	sp|Q15149|PLEC_HUMAN	Plectin OS=Homo sapiens GN=PLEC PE=1 SV=3	0.00305075	97.11	GTQGAEEVLR	Formyl@N-term		-0.00304471	1086.53	544.271	1086.53	544.273	2	12	9.1.1.1501.17	0	16.3801	966.931	16.3466
1	207.11	207.11	59.16	33.84	27.69	sp|Q15149|PLEC_HUMAN	Plectin OS=Homo sapiens GN=PLEC PE=1 SV=3	0.00305075	96.97	SSIAGLLLK	Formyl@N-term; iTRAQ8plex(K)@9		-0.00174709	1232.76	617.389	1232.76	617.39	2	11	19.1.1.1148.9	0	36.8686	588.154	36.7858
1	207.11	207.11	59.16	33.84	27.69	sp|Q15149|PLEC_HUMAN	Plectin OS=Homo sapiens GN=PLEC PE=1 SV=3	0.554396	96.69	QSSEAEIQAK	Gln->pyro-Glu@N-term; iTRAQ8plex(K)@10		0.00441269	1376.71	689.364	1376.71	689.362	2	11	8.1.1.1524.23	1	12.6989	149.117	12.5917
1	207.11	207.11	59.16	33.84	27.69	sp|Q15149|PLEC_HUMAN	Plectin OS=Homo sapiens GN=PLEC PE=1 SV=3	0.725842	96.64	QLAAEEER	iTRAQ8plex@N-term		-0.00367855	1248.66	625.336	1248.66	625.338	2	11	9.1.1.1397.30	1	9.9997	300.943	10.0065
1	207.11	207.11	59.16	33.84	27.69	sp|Q15149|PLEC_HUMAN	Plectin OS=Homo sapiens GN=PLEC PE=1 SV=3	0.00261362	96.33	AEMEVLLASK	Formyl@N-term; iTRAQ8plex(K)@10		0.00144307	1421.78	711.895	1421.77	711.894	2	12	5.1.1.1432.10	0	32.7474	358.828	32.7257
1	207.11	207.11	59.16	33.84	27.69	sp|Q15149|PLEC_HUMAN	Plectin OS=Homo sapiens GN=PLEC PE=1 SV=3	0.0127808	96.23	LTAEDLFEAR	iTRAQ8plex@N-term		-1.01063	1466.78	734.396	1467.79	734.901	2	12	7.1.1.1553.22	0	28.9343	794.715	28.893
1	207.11	207.11	59.16	33.84	27.69	sp|Q15149|PLEC_HUMAN	Plectin OS=Homo sapiens GN=PLEC PE=1 SV=3	0.00261362	95.91	LAQEQAR	iTRAQ8plex@N-term; Deamidated(Q)@5	cleaved E-L@N-term	-0.00690638	1119.61	560.813	1119.62	560.817	2	11	11.1.1.1390.22	0	12.3783	1031.2	12.9495
1	207.11	207.11	59.16	33.84	27.69	sp|Q15149|PLEC_HUMAN	Plectin OS=Homo sapiens GN=PLEC PE=1 SV=3	0.00217692	95.82	AQAEVEGLGK	Formyl@N-term; iTRAQ8plex(K)@10		-0.00264596	1332.72	667.365	1332.72	667.367	2	12	13.1.1.1529.25	0	19.1336	308.908	19.0868
1	207.11	207.11	59.16	33.84	27.69	sp|Q15149|PLEC_HUMAN	Plectin OS=Homo sapiens GN=PLEC PE=1 SV=3	0.000434512	95.66	GLIVREHGIR	Formyl@N-term	missed R-E@5	-0.0184751	1176.65	589.334	1176.67	589.344	2	11	9.1.1.1639.17	0	24.8942	455.007	24.8608
1	207.11	207.11	59.16	33.84	27.69	sp|Q15149|PLEC_HUMAN	Plectin OS=Homo sapiens GN=PLEC PE=1 SV=3	0.463442	95.58	QRLEAEAGR	Gln->pyro-Glu@N-term	missed R-L@2	0.0141254	1011.52	506.769	1011.51	506.762	2	11	5.1.1.1043.26	0	8.8361	197.708	8.788
2	172.85	173.19	68.2	56.16	51.63	sp|Q9Y490|TLN1_HUMAN	Talin-1 OS=Homo sapiens GN=TLN1 PE=1 SV=3	2	99	AAMEPIVISAK	Formyl@N-term; iTRAQ8plex(K)@11		-0.00655586	1460.82	731.415	1460.82	731.418	2	16	5.1.1.1367.17	0	28.7631	3218.38	28.7301
2	172.85	173.19	68.2	56.16	51.63	sp|Q9Y490|TLN1_HUMAN	Talin-1 OS=Homo sapiens GN=TLN1 PE=1 SV=3	2	99	AATAPLLEAVDNLSAFASNPEFSSIPAQISPEGR	No iTRAQ8plex@N-term; Deamidated(N)@19		0.0829847	3470.8	868.708	3470.72	868.687	4	17	3.1.1.1027.12	0	46.9307	332.881	46.9674
2	172.85	173.19	68.2	56.16	51.63	sp|Q9Y490|TLN1_HUMAN	Talin-1 OS=Homo sapiens GN=TLN1 PE=1 SV=3	2	99	ACKEAAYHPEVAPDVR	Formyl@N-term; Methylthio(C)@2; iTRAQ8plex(K)@3	missed K-E@3	0.00753338	2133.04	712.019	2133.03	712.017	3	20	2.1.1.492.26	0	18.7755	907.433	18.7276
2	172.85	173.19	68.2	56.16	51.63	sp|Q9Y490|TLN1_HUMAN	Talin-1 OS=Homo sapiens GN=TLN1 PE=1 SV=3	2	99	AIADMLR	iTRAQ8plex@N-term		-0.0104715	1092.62	547.315	1092.63	547.321	2	12	15.1.1.1857.8	1	36.6889	561.209	36.7323
2	172.85	173.19	68.2	56.16	51.63	sp|Q9Y490|TLN1_HUMAN	Talin-1 OS=Homo sapiens GN=TLN1 PE=1 SV=3	2	99	AIAVTVQEMVTK	Formyl@N-term; iTRAQ8plex(K)@12		-0.0217976	1620.88	811.449	1620.91	811.46	2	15	9.1.1.1830.18	0	36.6929	513.696	36.7196
2	172.85	173.19	68.2	56.16	51.63	sp|Q9Y490|TLN1_HUMAN	Talin-1 OS=Homo sapiens GN=TLN1 PE=1 SV=3	2	99	ALAVNPR	iTRAQ8plex@N-term		-0.00375821	1043.64	522.825	1043.64	522.827	2	11	3.1.1.454.22	1	11.616	2509.95	11.5745
2	172.85	173.19	68.2	56.16	51.63	sp|Q9Y490|TLN1_HUMAN	Talin-1 OS=Homo sapiens GN=TLN1 PE=1 SV=3	2	99	ALCGFTEAAAQAAYLVGVSDPNSQAGQQGLVEPTQFAR	iTRAQ8plex@N-term; Methylthio(C)@3; Deamidated(N)@22		0.0168393	4216.07	1055.02	4216.05	1055.02	4	20	7.1.1.1844.25	0	46.9077	254.522	46.9854
2	172.85	173.19	68.2	56.16	51.63	sp|Q9Y490|TLN1_HUMAN	Talin-1 OS=Homo sapiens GN=TLN1 PE=1 SV=3	2	99	ALDGAFTEENR	iTRAQ8plex@N-term		-0.993361	1524.77	763.395	1525.77	763.891	2	14	20.1.1.881.27	0	18.0907	1250.91	17.8536
2	172.85	173.19	68.2	56.16	51.63	sp|Q9Y490|TLN1_HUMAN	Talin-1 OS=Homo sapiens GN=TLN1 PE=1 SV=3	2	99	ALDYYMLR	iTRAQ8plex@N-term		-0.00769647	1347.71	674.862	1347.72	674.865	2	13	15.1.1.1864.23	1	37.1466	1008.97	37.5358
2	172.85	173.19	68.2	56.16	51.63	sp|Q9Y490|TLN1_HUMAN	Talin-1 OS=Homo sapiens GN=TLN1 PE=1 SV=3	2	99	ALDYYMLRNGDTMEYR	iTRAQ8plex@N-term; Deamidated(N)@9	missed R-N@8	0.00230636	2315.09	772.704	2315.09	772.703	3	14	9.1.1.1674.24	0	27.0651	355.514	27.0201
2	172.85	173.19	68.2	56.16	51.63	sp|Q9Y490|TLN1_HUMAN	Talin-1 OS=Homo sapiens GN=TLN1 PE=1 SV=3	2	99	ALEATTEHIR	iTRAQ8plex@N-term		0.00160472	1443.8	482.274	1443.8	482.274	3	14	2.1.1.434.16	1	15.1773	2507.19	15.0834
2	172.85	173.19	68.2	56.16	51.63	sp|Q9Y490|TLN1_HUMAN	Talin-1 OS=Homo sapiens GN=TLN1 PE=1 SV=3	2	99	ALSTDPAAPNLK	iTRAQ8plex@N-term; iTRAQ8plex(K)@12		0.00215958	1805.05	602.692	1805.05	602.691	3	16	3.1.1.549.20	1	17.4611	713.851	17.4844
2	172.85	173.19	68.2	56.16	51.63	sp|Q9Y490|TLN1_HUMAN	Talin-1 OS=Homo sapiens GN=TLN1 PE=1 SV=3	2	99	AQVVSNLK	Formyl@N-term; iTRAQ8plex(K)@8		-0.00655131	1189.69	595.853	1189.7	595.856	2	12	2.1.1.491.14	0	18.6943	1049.47	18.6659
2	172.85	173.19	68.2	56.16	51.63	sp|Q9Y490|TLN1_HUMAN	Talin-1 OS=Homo sapiens GN=TLN1 PE=1 SV=3	2	99	ASAGPQPLLVQSCK	Formyl@N-term; Methylthio(C)@13; iTRAQ8plex(K)@14		0.000783696	1775.92	888.968	1775.92	888.968	2	18	10.1.1.1677.28	0	29.087	1624.92	29.0351
2	172.85	173.19	68.2	56.16	51.63	sp|Q9Y490|TLN1_HUMAN	Talin-1 OS=Homo sapiens GN=TLN1 PE=1 SV=3	2	99	ASVPTIQDQASAMQLSQCAK	iTRAQ8plex@N-term; Methylthio(C)@18; iTRAQ8plex(K)@20		-0.00974491	2730.39	683.604	2730.4	683.606	4	21	9.1.1.1680.18	1	27.426	1589.69	27.3909
2	172.85	173.19	68.2	56.16	51.63	sp|Q9Y490|TLN1_HUMAN	Talin-1 OS=Homo sapiens GN=TLN1 PE=1 SV=3	2	99	AVAAGNSCRQEDVIATANLSR	Formyl@N-term; Deamidated(N)@6; Methylthio(C)@8	missed R-Q@9	0.000217576	2220.03	741.016	2220.03	741.016	3	20	3.1.1.634.27	0	22.7116	1019.59	22.6617
2	172.85	173.19	68.2	56.16	51.63	sp|Q9Y490|TLN1_HUMAN	Talin-1 OS=Homo sapiens GN=TLN1 PE=1 SV=3	2	99	AVAEQIPLLVQGVR	Formyl@N-term		0.00332711	1519.88	760.945	1519.87	760.943	2	15	17.1.1.1112.20	0	39.4791	16750.8	39.1285
2	172.85	173.19	68.2	56.16	51.63	sp|Q9Y490|TLN1_HUMAN	Talin-1 OS=Homo sapiens GN=TLN1 PE=1 SV=3	2	99	AVEGCVSASQAATEDGQLLR	iTRAQ8plex@N-term; Methylthio(C)@5		-4.02009	2350.13	784.384	2354.15	785.724	3	17	7.1.1.1581.20	0	30.6597	170.321	30.6831
2	172.85	173.19	68.2	56.16	51.63	sp|Q9Y490|TLN1_HUMAN	Talin-1 OS=Homo sapiens GN=TLN1 PE=1 SV=3	2	99	AVSSAIAQLLGEVAQGNENYAGIAAR	iTRAQ8plex@N-term; Deamidated(N)@17		0.0185535	2877.53	960.185	2877.51	960.179	3	17	8.1.1.2073.20	0	46.5606	100.968	46.522
2	172.85	173.19	68.2	56.16	51.63	sp|Q9Y490|TLN1_HUMAN	Talin-1 OS=Homo sapiens GN=TLN1 PE=1 SV=3	2	99	AVTQALNR	iTRAQ8plex@N-term		-0.00446829	1175.69	588.851	1175.69	588.854	2	14	5.1.1.1131.27	0	14.2265	630.783	14.3
2	172.85	173.19	68.2	56.16	51.63	sp|Q9Y490|TLN1_HUMAN	Talin-1 OS=Homo sapiens GN=TLN1 PE=1 SV=3	2	99	DLDQASLAAVSQQLAPR	Formyl@N-term		-0.00538786	1809.92	905.966	1809.92	905.968	2	24	9.1.1.1778.30	0	33.4954	3101.11	33.5021
2	172.85	173.19	68.2	56.16	51.63	sp|Q9Y490|TLN1_HUMAN	Talin-1 OS=Homo sapiens GN=TLN1 PE=1 SV=3	2	99	DPPSWSVLAGHSR	Formyl@N-term		-0.00497036	1435.68	718.847	1435.68	718.849	2	13	10.1.1.1593.27	0	23.8974	3188.13	23.662
2	172.85	173.19	68.2	56.16	51.63	sp|Q9Y490|TLN1_HUMAN	Talin-1 OS=Homo sapiens GN=TLN1 PE=1 SV=3	2	99	EAAYHPEVAPDVR	Formyl@N-term		-0.00155477	1480.69	741.354	1480.69	741.355	2	16	12.1.1.688.27	0	15.4921	1429.07	15.3167
2	172.85	173.19	68.2	56.16	51.63	sp|Q9Y490|TLN1_HUMAN	Talin-1 OS=Homo sapiens GN=TLN1 PE=1 SV=3	2	99	EADESLNFEEQILEAAK	Formyl@N-term; iTRAQ8plex(K)@17		0.00197697	2267.11	756.712	2267.11	756.711	3	15	19.1.1.1146.21	0	36.7639	875.398	36.8482
2	172.85	173.19	68.2	56.16	51.63	sp|Q9Y490|TLN1_HUMAN	Talin-1 OS=Homo sapiens GN=TLN1 PE=1 SV=3	2	99	ECDNALRELETVR	Formyl@N-term; Methylthio(C)@2	missed R-E@7	-0.00284751	1620.72	811.368	1620.72	811.369	2	18	2.1.1.700.17	0	31.5737	460.333	31.5403
2	172.85	173.19	68.2	56.16	51.63	sp|Q9Y490|TLN1_HUMAN	Talin-1 OS=Homo sapiens GN=TLN1 PE=1 SV=3	2	99	EGISQEALHTQMLTAVQEISHLIEPLANAAR	Formyl@N-term		0.0318914	3397.76	1133.6	3397.73	1133.58	3	18	9.1.1.3594.29	0	58.102	298.842	57.9861
2	172.85	173.19	68.2	56.16	51.63	sp|Q9Y490|TLN1_HUMAN	Talin-1 OS=Homo sapiens GN=TLN1 PE=1 SV=3	2	99	ELEEAR	iTRAQ8plex@N-term		0.00840957	1049.57	525.794	1049.57	525.79	2	10	3.1.1.396.30	0	8.0525	356.861	7.9975
2	172.85	173.19	68.2	56.16	51.63	sp|Q9Y490|TLN1_HUMAN	Talin-1 OS=Homo sapiens GN=TLN1 PE=1 SV=3	2	99	EQGVEEHETLLLR	Formyl@N-term		0.00171164	1579.79	790.9	1579.78	790.899	2	15	18.1.1.958.21	0	26.8109	598.522	26.6477
2	172.85	173.19	68.2	56.16	51.63	sp|Q9Y490|TLN1_HUMAN	Talin-1 OS=Homo sapiens GN=TLN1 PE=1 SV=3	2	99	ERIPEAPAGPPSDFGLFLSDDDPK	iTRAQ8plex@N-term; iTRAQ8plex(K)@24	missed R-I@2	-0.0227281	3177.62	795.413	3177.64	795.418	4	16	7.1.1.1630.14	1	33.6728	189.619	33.6442
2	172.85	173.19	68.2	56.16	51.63	sp|Q9Y490|TLN1_HUMAN	Talin-1 OS=Homo sapiens GN=TLN1 PE=1 SV=3	2	99	EVANSTANLVK	iTRAQ8plex@N-term; iTRAQ8plex(K)@11		-0.00516066	1753.01	585.345	1753.02	585.347	3	14	2.1.1.442.23	0	15.6832	1017.42	15.5786
2	172.85	173.19	68.2	56.16	51.63	sp|Q9Y490|TLN1_HUMAN	Talin-1 OS=Homo sapiens GN=TLN1 PE=1 SV=3	2	99	FFYSDQNVDSRDPVQLNLLYVQAR	Formyl@N-term	missed R-D@11	0.00277422	2914.43	972.483	2914.43	972.482	3	18	2.1.1.834.29	0	39.8603	488.398	39.8687
2	172.85	173.19	68.2	56.16	51.63	sp|Q9Y490|TLN1_HUMAN	Talin-1 OS=Homo sapiens GN=TLN1 PE=1 SV=3	2	99	FLPSELRDEH	iTRAQ8plex@N-term	missed R-D@7	-0.000625861	1545.81	516.277	1545.81	516.277	3	15	7.1.1.1452.8	1	22.6826	5977.25	22.6642
2	172.85	173.19	68.2	56.16	51.63	sp|Q9Y490|TLN1_HUMAN	Talin-1 OS=Homo sapiens GN=TLN1 PE=1 SV=3	2	99	GITMATAK	iTRAQ8plex@N-term; iTRAQ8plex(K)@8		0.00165116	1399.83	700.924	1399.83	700.923	2	12	4.1.1.958.30	0	13.5043	128.477	13.4499
2	172.85	173.19	68.2	56.16	51.63	sp|Q9Y490|TLN1_HUMAN	Talin-1 OS=Homo sapiens GN=TLN1 PE=1 SV=3	2	99	GLAGAVSELLR	Formyl@N-term		0.00238301	1112.62	557.318	1112.62	557.317	2	14	19.1.1.1250.3	0	43.212	722.811	43.3262
2	172.85	173.19	68.2	56.16	51.63	sp|Q9Y490|TLN1_HUMAN	Talin-1 OS=Homo sapiens GN=TLN1 PE=1 SV=3	2	99	GSQAQPDSPSAQLALIAASQSFLQPGGK	Formyl@N-term; iTRAQ8plex(K)@28		-0.000673955	3085.6	1029.54	3085.6	1029.54	3	15	2.1.1.816.23	0	38.7405	4191.83	38.817
2	172.85	173.19	68.2	56.16	51.63	sp|Q9Y490|TLN1_HUMAN	Talin-1 OS=Homo sapiens GN=TLN1 PE=1 SV=3	2	99	GTEWVDPEDPTVIAENELLGAAAAIEAAAK	iTRAQ8plex@N-term; iTRAQ8plex(K)@30		-0.00948072	3658.91	915.735	3658.92	915.737	4	15	8.1.1.2083.17	1	47.1764	793.813	47.1426
2	172.85	173.19	68.2	56.16	51.63	sp|Q9Y490|TLN1_HUMAN	Talin-1 OS=Homo sapiens GN=TLN1 PE=1 SV=3	2	99	IGITNHDEYSLVR	Formyl@N-term; Deamidated(N)@5		-0.00241793	1544.74	773.38	1544.75	773.381	2	17	5.1.1.1327.25	0	26.3187	844.897	26.3337
2	172.85	173.19	68.2	56.16	51.63	sp|Q9Y490|TLN1_HUMAN	Talin-1 OS=Homo sapiens GN=TLN1 PE=1 SV=3	2	99	ILAQATSDLVNAIK	Formyl@N-term; iTRAQ8plex(K)@14		-0.000532443	1788.03	895.022	1788.03	895.022	2	17	20.1.1.1334.24	0	46.253	883.8	46.2074
2	172.85	173.19	68.2	56.16	51.63	sp|Q9Y490|TLN1_HUMAN	Talin-1 OS=Homo sapiens GN=TLN1 PE=1 SV=3	2	99	ISIGNVVK	iTRAQ8plex@N-term; iTRAQ8plex(K)@8		-0.011534	1436.91	479.976	1436.92	479.98	3	11	9.1.1.1607.5	1	22.9038	1388.87	23.014
2	172.85	173.19	68.2	56.16	51.63	sp|Q9Y490|TLN1_HUMAN	Talin-1 OS=Homo sapiens GN=TLN1 PE=1 SV=3	2	99	KSTVLQQQYNR	iTRAQ8plex@N-term; iTRAQ8plex(K)@1	missed K-S@1	-0.000574599	1972.13	658.384	1972.13	658.384	3	17	4.1.1.918.30	1	11.0435	1491.26	11.1119
2	172.85	173.19	68.2	56.16	51.63	sp|Q9Y490|TLN1_HUMAN	Talin-1 OS=Homo sapiens GN=TLN1 PE=1 SV=3	2	99	LAQAAQSSVATITR	Formyl@N-term		-0.00423162	1443.76	722.889	1443.77	722.891	2	17	8.1.1.1795.23	0	29.3811	2762.11	29.2155
2	172.85	173.19	68.2	56.16	51.63	sp|Q9Y490|TLN1_HUMAN	Talin-1 OS=Homo sapiens GN=TLN1 PE=1 SV=3	2	99	LGAASLGAEDPETQVVLINAVK	iTRAQ8plex@N-term; iTRAQ8plex(K)@22		-1.00767	2801.59	701.404	2802.6	701.656	4	16	9.1.1.1790.12	0	34.2075	207.599	34.1824
2	172.85	173.19	68.2	56.16	51.63	sp|Q9Y490|TLN1_HUMAN	Talin-1 OS=Homo sapiens GN=TLN1 PE=1 SV=3	2	99	LHTDDELNWLDHGR	Formyl@N-term		-0.00635148	1747.79	583.602	1747.79	583.604	3	20	5.1.1.1333.5	0	26.6545	4620.43	26.6417
2	172.85	173.19	68.2	56.16	51.63	sp|Q9Y490|TLN1_HUMAN	Talin-1 OS=Homo sapiens GN=TLN1 PE=1 SV=3	2	99	LLAALLEDEGGSGRPLLQAAK	Formyl@N-term; iTRAQ8plex(K)@21		0.000602223	2453.38	818.801	2453.38	818.8	3	23	2.1.1.913.11	0	44.7221	1476.08	44.7605
2	172.85	173.19	68.2	56.16	51.63	sp|Q9Y490|TLN1_HUMAN	Talin-1 OS=Homo sapiens GN=TLN1 PE=1 SV=3	2	99	LLSDSLPPSTGTFQEAQSR	Delta:H(2)C(2)@N-term; iTRAQ8plex(S)@5		0.0403658	2363.27	788.763	2363.23	788.75	3	13	2.1.1.799.20	0	37.6848	286.56	37.6465
2	172.85	173.19	68.2	56.16	51.63	sp|Q9Y490|TLN1_HUMAN	Talin-1 OS=Homo sapiens GN=TLN1 PE=1 SV=3	2	99	LNEAAAGLNQAATELVQASR	Formyl@N-term		0.00372195	2054.04	1028.03	2054.04	1028.03	2	21	17.1.1.1144.29	0	41.4861	2101.52	41.2451
2	172.85	173.19	68.2	56.16	51.63	sp|Q9Y490|TLN1_HUMAN	Talin-1 OS=Homo sapiens GN=TLN1 PE=1 SV=3	2	99	LQAAGNAVK	iTRAQ8plex@N-term; iTRAQ8plex(K)@9		0.00272955	1478.91	493.976	1478.9	493.975	3	14	3.1.1.487.16	0	13.6375	1515.62	13.6676
2	172.85	173.19	68.2	56.16	51.63	sp|Q9Y490|TLN1_HUMAN	Talin-1 OS=Homo sapiens GN=TLN1 PE=1 SV=3	2	99	LREAAEGLR	iTRAQ8plex@N-term	missed R-E@2	-0.000909824	1317.77	440.263	1317.77	440.263	3	14	3.1.1.512.9	0	15.1666	1670.7	15.2083
2	172.85	173.19	68.2	56.16	51.63	sp|Q9Y490|TLN1_HUMAN	Talin-1 OS=Homo sapiens GN=TLN1 PE=1 SV=3	2	99	MATNAAAQNAIK	iTRAQ8plex@N-term; iTRAQ8plex(K)@12		0.0105076	1811.03	604.684	1811.02	604.68	3	16	2.1.1.399.28	1	13.0476	410.833	12.9957
2	172.85	173.19	68.2	56.16	51.63	sp|Q9Y490|TLN1_HUMAN	Talin-1 OS=Homo sapiens GN=TLN1 PE=1 SV=3	2	99	MVAAAK	iTRAQ8plex@N-term; iTRAQ8plex(K)@6		-0.00730386	1197.73	400.25	1197.74	400.253	3	10	3.1.1.445.11	0	11.0439	2255.58	11.0823
2	172.85	173.19	68.2	56.16	51.63	sp|Q9Y490|TLN1_HUMAN	Talin-1 OS=Homo sapiens GN=TLN1 PE=1 SV=3	2	99	MVAAATNNLCEAANAAVQGHASQEK	Formyl@N-term; Methylthio(C)@10; iTRAQ8plex(K)@25		0.00869428	2876.36	959.794	2876.35	959.791	3	13	2.1.1.787.29	0	36.959	220.624	36.9056
2	172.85	173.19	68.2	56.16	51.63	sp|Q9Y490|TLN1_HUMAN	Talin-1 OS=Homo sapiens GN=TLN1 PE=1 SV=3	2	99	MVGGIAQIIAAQEEMLR	Formyl@N-term		-0.00591145	1856.94	929.479	1856.95	929.482	2	17	5.1.1.1676.7	0	47.8391	101.387	47.8741
2	172.85	173.19	68.2	56.16	51.63	sp|Q9Y490|TLN1_HUMAN	Talin-1 OS=Homo sapiens GN=TLN1 PE=1 SV=3	2	99	MVGGIAQIIAAQEEMLRK	Formyl@N-term; iTRAQ8plex(K)@18	missed R-K@17	-0.00556856	2289.24	764.088	2289.25	764.09	3	15	5.1.1.1658.8	0	46.7158	852.778	46.5112
2	172.85	173.19	68.2	56.16	51.63	sp|Q9Y490|TLN1_HUMAN	Talin-1 OS=Homo sapiens GN=TLN1 PE=1 SV=3	2	99	NGNLPEFGDAISTASK	iTRAQ8plex@N-term; Deamidated(N)@1; iTRAQ8plex(K)@16		0.000132662	2229.17	744.065	2229.17	744.065	3	16	4.1.1.1113.25	0	23.0319	707.318	22.9853
2	172.85	173.19	68.2	56.16	51.63	sp|Q9Y490|TLN1_HUMAN	Talin-1 OS=Homo sapiens GN=TLN1 PE=1 SV=3	2	99	NLGTALAELR	iTRAQ8plex@N-term		-0.00894022	1360.79	681.402	1360.8	681.406	2	18	9.1.1.1690.19	1	28.0461	5756.16	28.133
2	172.85	173.19	68.2	56.16	51.63	sp|Q9Y490|TLN1_HUMAN	Talin-1 OS=Homo sapiens GN=TLN1 PE=1 SV=3	2	99	QAAASATQTIAAAQHAASTPK	Gln->pyro-Glu@N-term; iTRAQ8plex(K)@21		0.00333863	2281.2	761.407	2281.2	761.406	3	23	5.1.1.1250.31	1	21.5705	2354.28	21.5136
2	172.85	173.19	68.2	56.16	51.63	sp|Q9Y490|TLN1_HUMAN	Talin-1 OS=Homo sapiens GN=TLN1 PE=1 SV=3	2	99	QEDVIATANLSR	Gln->pyro-Glu@N-term		0.00824827	1298.65	650.335	1298.65	650.331	2	15	18.1.1.855.13	0	20.3901	730.407	20.4253
2	172.85	173.19	68.2	56.16	51.63	sp|Q9Y490|TLN1_HUMAN	Talin-1 OS=Homo sapiens GN=TLN1 PE=1 SV=3	2	99	QKLHTDDELNWLDHGR	Formyl@N-term; iTRAQ8plex(K)@2	missed K-L@2	-0.000658061	2308.15	578.045	2308.15	578.045	4	17	4.1.1.1142.7	0	24.7936	271.217	24.5295
2	172.85	173.19	68.2	56.16	51.63	sp|Q9Y490|TLN1_HUMAN	Talin-1 OS=Homo sapiens GN=TLN1 PE=1 SV=3	2	99	QVAASTAQLLVACK	iTRAQ8plex@N-term; Methylthio(C)@13; iTRAQ8plex(K)@14		-0.0027022	2056.16	686.394	2056.16	686.395	3	14	3.1.1.809.9	0	33.4696	85.4012	33.3877
2	172.85	173.19	68.2	56.16	51.63	sp|Q9Y490|TLN1_HUMAN	Talin-1 OS=Homo sapiens GN=TLN1 PE=1 SV=3	2	99	RAIADMLR	Formyl@N-term	missed R-A@1	-0.0053246	972.512	487.263	972.517	487.266	2	13	10.1.1.1583.9	0	23.2499	4346.03	23.3532
2	172.85	173.19	68.2	56.16	51.63	sp|Q9Y490|TLN1_HUMAN	Talin-1 OS=Homo sapiens GN=TLN1 PE=1 SV=3	2	99	SGASGPENFQVGSMPPAQQQITSGQMHR	Formyl@N-term		-0.00660235	2954.33	985.785	2954.34	985.787	3	21	4.1.1.1080.31	0	21.0177	2108.69	21.0843
2	172.85	173.19	68.2	56.16	51.63	sp|Q9Y490|TLN1_HUMAN	Talin-1 OS=Homo sapiens GN=TLN1 PE=1 SV=3	2	99	SIAAATSALVK	Formyl@N-term; iTRAQ8plex(K)@11		-0.0111675	1362.79	682.403	1362.8	682.409	2	15	9.1.1.1713.14	0	29.459	3874.05	29.2452
2	172.85	173.19	68.2	56.16	51.63	sp|Q9Y490|TLN1_HUMAN	Talin-1 OS=Homo sapiens GN=TLN1 PE=1 SV=3	2	99	SNTSPEELGPLANQLTSDYGR	iTRAQ8plex@N-term; Deamidated(N)@2		-0.0178838	2553.23	852.085	2553.25	852.091	3	16	4.1.1.1185.25	0	27.4787	308.634	27.3701
2	172.85	173.19	68.2	56.16	51.63	sp|Q9Y490|TLN1_HUMAN	Talin-1 OS=Homo sapiens GN=TLN1 PE=1 SV=3	2	99	SQLAAAAR	iTRAQ8plex@N-term		-0.00147742	1090.64	546.327	1090.64	546.327	2	13	18.1.1.736.21	1	13.0201	454.901	12.9804
2	172.85	173.19	68.2	56.16	51.63	sp|Q9Y490|TLN1_HUMAN	Talin-1 OS=Homo sapiens GN=TLN1 PE=1 SV=3	2	99	STVLQQQYNR	Arg-add@N-term; iTRAQ8plex(T)@2		-0.0113674	1695.92	566.314	1695.93	566.318	3	14	2.1.1.384.27	0	12.1176	2131.36	12.0677
2	172.85	173.19	68.2	56.16	51.63	sp|Q9Y490|TLN1_HUMAN	Talin-1 OS=Homo sapiens GN=TLN1 PE=1 SV=3	2	99	TLAESALQLLYTAK	iTRAQ8plex@N-term; iTRAQ8plex(K)@14		-0.00448069	2129.25	710.758	2129.26	710.759	3	17	6.1.1.1465.5	1	42.7143	1105	42.5779
2	172.85	173.19	68.2	56.16	51.63	sp|Q9Y490|TLN1_HUMAN	Talin-1 OS=Homo sapiens GN=TLN1 PE=1 SV=3	2	99	TLREQGVEEHETLLLR	Formyl@N-term	missed R-E@3	0.00198791	1950.02	651.014	1950.02	651.013	3	23	2.1.1.539.13	0	21.6401	4320.72	21.6751
2	172.85	173.19	68.2	56.16	51.63	sp|Q9Y490|TLN1_HUMAN	Talin-1 OS=Homo sapiens GN=TLN1 PE=1 SV=3	2	99	TLSHPQQMALLDQTK	Formyl@N-term; iTRAQ8plex(K)@15		-0.00323159	2042.07	681.699	2042.08	681.7	3	18	7.1.1.1489.18	0	24.9802	2126.01	24.9451
2	172.85	173.19	68.2	56.16	51.63	sp|Q9Y490|TLN1_HUMAN	Talin-1 OS=Homo sapiens GN=TLN1 PE=1 SV=3	2	99	TMLESAGGLIQTAR	No iTRAQ8plex@N-term		-0.0116937	1446.74	724.376	1446.75	724.382	2	12	10.1.1.1592.29	0	23.8391	312.409	23.7857
2	172.85	173.19	68.2	56.16	51.63	sp|Q9Y490|TLN1_HUMAN	Talin-1 OS=Homo sapiens GN=TLN1 PE=1 SV=3	2	99	TSTPEDFIR	iTRAQ8plex@N-term		0.00306648	1368.72	685.368	1368.72	685.367	2	14	20.1.1.900.23	1	19.2678	1495.08	19.1618
2	172.85	173.19	68.2	56.16	51.63	sp|Q9Y490|TLN1_HUMAN	Talin-1 OS=Homo sapiens GN=TLN1 PE=1 SV=3	2	99	VAGSVTELIQAAEAMK	iTRAQ8plex@N-term; iTRAQ8plex(K)@16		-0.00767982	2225.25	742.756	2225.26	742.759	3	12	21.1.1.1834.10	1	45.0439	76.9126	44.9594
2	172.85	173.19	68.2	56.16	51.63	sp|Q9Y490|TLN1_HUMAN	Talin-1 OS=Homo sapiens GN=TLN1 PE=1 SV=3	2	99	VEHGSVALPAIMR	Formyl@N-term		-0.00927602	1406.72	704.37	1406.73	704.374	2	16	10.1.1.1670.16	0	28.6341	301.248	28.5408
2	172.85	173.19	68.2	56.16	51.63	sp|Q9Y490|TLN1_HUMAN	Talin-1 OS=Homo sapiens GN=TLN1 PE=1 SV=3	2	99	VGAIPANALDDGQWSQGLISAAR	iTRAQ8plex@N-term; Deamidated(N)@7		0.0335197	2614.4	872.474	2614.37	872.463	3	20	10.1.1.1758.25	0	34.0809	227.841	33.9723
2	172.85	173.19	68.2	56.16	51.63	sp|Q9Y490|TLN1_HUMAN	Talin-1 OS=Homo sapiens GN=TLN1 PE=1 SV=3	2	99	VLGEAMTGISQNAK	Formyl@N-term; iTRAQ8plex(K)@14		-0.00462887	1749.92	875.967	1749.92	875.969	2	17	9.1.1.1719.30	0	29.8557	1539.57	29.8624
2	172.85	173.19	68.2	56.16	51.63	sp|Q9Y490|TLN1_HUMAN	Talin-1 OS=Homo sapiens GN=TLN1 PE=1 SV=3	2	99	VLVQNAAGSQEK	iTRAQ8plex@N-term; iTRAQ8plex(K)@12		-0.0125773	1851.05	618.026	1851.07	618.03	3	17	6.1.1.1034.29	1	16.1512	192.71	16.098
2	172.85	173.19	68.2	56.16	51.63	sp|Q9Y490|TLN1_HUMAN	Talin-1 OS=Homo sapiens GN=TLN1 PE=1 SV=3	2	99	VMVTNVTSLLK	Formyl@N-term; iTRAQ8plex(K)@11		-0.000653357	1535.89	768.952	1535.89	768.952	2	14	2.1.1.815.11	0	38.6558	556.577	38.5105
2	172.85	173.19	68.2	56.16	51.63	sp|Q9Y490|TLN1_HUMAN	Talin-1 OS=Homo sapiens GN=TLN1 PE=1 SV=3	2	99	VSHVLAALQAGNR	Formyl@N-term		-0.0106864	1362.73	682.37	1362.74	682.376	2	18	7.1.1.1605.6	0	32.1143	975.296	31.9149
2	172.85	173.19	68.2	56.16	51.63	sp|Q9Y490|TLN1_HUMAN	Talin-1 OS=Homo sapiens GN=TLN1 PE=1 SV=3	2	99	VSQMAQYFEPLTLAAVGAASK	Formyl@N-term; iTRAQ8plex(K)@21		-0.00775311	2513.31	838.776	2513.31	838.779	3	16	5.1.1.1657.11	0	46.6587	3145.76	46.5732
2	172.85	173.19	68.2	56.16	51.63	sp|Q9Y490|TLN1_HUMAN	Talin-1 OS=Homo sapiens GN=TLN1 PE=1 SV=3	2	99	VVAPTISSPVCQEQLVEAGR	iTRAQ8plex@N-term; Methylthio(C)@11		0.00233181	2432.27	811.765	2432.27	811.764	3	18	10.1.1.1720.28	1	31.7396	1164.09	31.564
2	172.85	173.19	68.2	56.16	51.63	sp|Q9Y490|TLN1_HUMAN	Talin-1 OS=Homo sapiens GN=TLN1 PE=1 SV=3	2	99	YDQATDTILTVTENIFSSMGDAGEMVR	Formyl@N-term		0.0165041	2991.36	998.129	2991.35	998.123	3	12	5.1.1.1669.22	0	47.4241	337.336	47.3822
2	172.85	173.19	68.2	56.16	51.63	sp|Q9Y490|TLN1_HUMAN	Talin-1 OS=Homo sapiens GN=TLN1 PE=1 SV=3	0.787812	99	SLAQAAR	No iTRAQ8plex@N-term		0.00114965	715.399	358.707	715.398	358.706	2	9	21.1.1.858.2	0	5.5336	186.882	5.5497
2	172.85	173.19	68.2	56.16	51.63	sp|Q9Y490|TLN1_HUMAN	Talin-1 OS=Homo sapiens GN=TLN1 PE=1 SV=3	0.567031	99	TMQFEPSTMVYDACR	Formyl@N-term; Methylthio(C)@14		-0.00646362	1851.72	926.869	1851.73	926.872	2	15	13.1.1.1865.27	0	39.8825	1202.08	39.9557
2	172.85	173.19	68.2	56.16	51.63	sp|Q9Y490|TLN1_HUMAN	Talin-1 OS=Homo sapiens GN=TLN1 PE=1 SV=3	0.527244	99	ALGDLISATK	Formyl@N-term; iTRAQ8plex(K)@10		-0.00825772	1319.75	660.883	1319.76	660.887	2	12	10.1.1.1732.8	0	32.4465	510.514	32.4279
2	172.85	173.19	68.2	56.16	51.63	sp|Q9Y490|TLN1_HUMAN	Talin-1 OS=Homo sapiens GN=TLN1 PE=1 SV=3	0.349692	99	HTSALCNSCR	Formyl@N-term; Methylthio(C)@6; Deamidated(N)@7; Methylthio(C)@9		-0.00346699	1211.42	606.715	1211.42	606.717	2	13	4.1.1.1003.23	0	16.2619	702.337	16.1576
2	172.85	173.19	68.2	56.16	51.63	sp|Q9Y490|TLN1_HUMAN	Talin-1 OS=Homo sapiens GN=TLN1 PE=1 SV=3	0.250264	99	TVTDMLMTICAR	Formyl@N-term; Methylthio(C)@10		0.000444352	1427.63	714.822	1427.63	714.821	2	16	16.1.1.1236.7	0	47.2082	1054.06	47.1909
2	172.85	173.19	68.2	56.16	51.63	sp|Q9Y490|TLN1_HUMAN	Talin-1 OS=Homo sapiens GN=TLN1 PE=1 SV=3	0.244125	99	DKAPGQLECETAIAALNSCLR	Formyl@N-term; iTRAQ8plex(K)@2; Methylthio(C)@9; Methylthio(C)@19	missed K-A@2	0.00271396	2626.26	876.426	2626.25	876.425	3	17	7.1.1.1848.16	0	47.1429	438.768	47.1106
2	172.85	173.19	68.2	56.16	51.63	sp|Q9Y490|TLN1_HUMAN	Talin-1 OS=Homo sapiens GN=TLN1 PE=1 SV=3	0.0867161	99	GVAALTSDPAVQAIVLDTASDVLDK	Formyl@N-term; iTRAQ8plex(K)@25		0.011694	2800.51	934.512	2800.5	934.508	3	15	10.1.1.1970.21	0	47.178	235.061	47.1376
2	172.85	173.19	68.2	56.16	51.63	sp|Q9Y490|TLN1_HUMAN	Talin-1 OS=Homo sapiens GN=TLN1 PE=1 SV=3	0.00130484	99	ADAEGESDLENSR	iTRAQ8plex@N-term		0.0161367	1695.8	566.274	1695.79	566.269	3	15	5.1.1.1049.25	0	9.2047	72.0234	9.158
2	172.85	173.19	68.2	56.16	51.63	sp|Q9Y490|TLN1_HUMAN	Talin-1 OS=Homo sapiens GN=TLN1 PE=1 SV=3	0.55752	98.85	SAQPASAEPR	No iTRAQ8plex@N-term		-0.000949467	1012.49	507.254	1012.49	507.254	2	10	21.1.1.798.2	0	4.7045	78.2866	4.7152
2	172.85	173.19	68.2	56.16	51.63	sp|Q9Y490|TLN1_HUMAN	Talin-1 OS=Homo sapiens GN=TLN1 PE=1 SV=3	1.63827	98.84	DVDNALR	iTRAQ8plex@N-term		-0.000352726	1105.6	553.809	1105.6	553.809	2	12	13.1.1.1557.12	1	20.8445	559.91	20.7575
2	172.85	173.19	68.2	56.16	51.63	sp|Q9Y490|TLN1_HUMAN	Talin-1 OS=Homo sapiens GN=TLN1 PE=1 SV=3	0.00480371	98.8	VGKVEHGSVALPAIMR	Formyl@N-term; iTRAQ8plex(K)@3; Oxidation(M)@15	missed K-V@3	-0.00786717	2011.11	671.378	2011.12	671.38	3	14	7.1.1.1480.22	0	24.431	305.141	24.451
2	172.85	173.19	68.2	56.16	51.63	sp|Q9Y490|TLN1_HUMAN	Talin-1 OS=Homo sapiens GN=TLN1 PE=1 SV=3	1.49485	98.38	GTPQDLAR	iTRAQ8plex@N-term		0.00208907	1160.65	581.331	1160.65	581.33	2	12	13.1.1.1477.25	1	15.9358	637.403	15.8272
2	172.85	173.19	68.2	56.16	51.63	sp|Q9Y490|TLN1_HUMAN	Talin-1 OS=Homo sapiens GN=TLN1 PE=1 SV=3	0.0132283	97.85	ALAVNPRDPPSWSVLAGHSR	Formyl@N-term	missed R-D@7	-0.0107073	2157.1	720.04	2157.11	720.043	3	11	18.1.1.1252.8	0	45.0967	101.85	45.1402
2	172.85	173.19	68.2	56.16	51.63	sp|Q9Y490|TLN1_HUMAN	Talin-1 OS=Homo sapiens GN=TLN1 PE=1 SV=3	0.0154727	97.57	ILAQATSDLVNAIKADAEGESDLENSR	Formyl@N-term; iTRAQ8plex(K)@14	missed K-A@14	-0.0026929	3161.6	791.407	3161.6	791.407	4	13	4.1.1.1504.6	0	47.1434	262.306	47.128
2	172.85	173.19	68.2	56.16	51.63	sp|Q9Y490|TLN1_HUMAN	Talin-1 OS=Homo sapiens GN=TLN1 PE=1 SV=3	0.00612309	96	TYGVSFFLVK	Formyl@N-term; iTRAQ8plex(K)@10		-0.00204134	1491.83	746.92	1491.83	746.921	2	12	4.1.1.1375.12	0	39.1854	405.289	39.1605
2	172.85	173.19	68.2	56.16	51.63	sp|Q9Y490|TLN1_HUMAN	Talin-1 OS=Homo sapiens GN=TLN1 PE=1 SV=3	0.00480371	95.58	ILADATAK	Formyl@N-term; iTRAQ8plex(K)@8		-0.00717308	1133.65	567.834	1133.66	567.837	2	11	3.1.1.606.8	0	20.9583	2077.69	21.0017
2	172.85	173.19	68.2	56.16	51.63	sp|Q9Y490|TLN1_HUMAN	Talin-1 OS=Homo sapiens GN=TLN1 PE=1 SV=3	1.06048	95.49	EAAEGLR	iTRAQ8plex@N-term		-0.00267475	1048.58	525.297	1048.58	525.298	2	12	10.1.1.1361.24	0	9.5996	633.642	9.6164
3	166.51	166.69	61.54	53.15	47.11	sp|P21333|FLNA_HUMAN	Filamin-A OS=Homo sapiens GN=FLNA PE=1 SV=4	2	99	AEAGVPAEFSIWTR	iTRAQ8plex@N-term; Dioxidation(W)@12		-0.0145234	1868.94	935.479	1868.96	935.486	2	16	6.1.1.1193.30	0	25.955	147.692	25.9617
3	166.51	166.69	61.54	53.15	47.11	sp|P21333|FLNA_HUMAN	Filamin-A OS=Homo sapiens GN=FLNA PE=1 SV=4	2	99	AFGPGLQGGSAGSPAR	No iTRAQ8plex@N-term		0.00166028	1428.71	715.364	1428.71	715.363	2	18	2.1.1.389.29	0	12.4304	622.814	12.4388
3	166.51	166.69	61.54	53.15	47.11	sp|P21333|FLNA_HUMAN	Filamin-A OS=Homo sapiens GN=FLNA PE=1 SV=4	2	99	AGGPGLERAEAGVPAEFSIWTR	Formyl@N-term; Dioxidation(W)@20	missed R-A@8	-0.0070129	2330.12	777.715	2330.13	777.717	3	17	9.1.1.1760.16	0	32.3627	181.91	32.331
3	166.51	166.69	61.54	53.15	47.11	sp|P21333|FLNA_HUMAN	Filamin-A OS=Homo sapiens GN=FLNA PE=1 SV=4	2	99	AGNNMLLVGVHGPR	Formyl@N-term; Deamidated(N)@4; Oxidation(M)@5		0.0269928	1478.76	740.386	1478.73	740.372	2	15	4.1.1.1048.24	0	19.0371	146.322	18.9919
3	166.51	166.69	61.54	53.15	47.11	sp|P21333|FLNA_HUMAN	Filamin-A OS=Homo sapiens GN=FLNA PE=1 SV=4	2	99	AGQSAAGAAPGGGVDTR	Formyl@N-term		0.00184801	1469.69	735.851	1469.69	735.85	2	18	7.1.1.1238.22	0	9.656	133.054	9.5999
3	166.51	166.69	61.54	53.15	47.11	sp|P21333|FLNA_HUMAN	Filamin-A OS=Homo sapiens GN=FLNA PE=1 SV=4	2	99	AGVAPLQVK	iTRAQ8plex@N-term; iTRAQ8plex(K)@9		-0.00136486	1489.94	497.655	1489.94	497.655	3	14	5.1.1.1208.12	1	18.9505	6765.38	19.049
3	166.51	166.69	61.54	53.15	47.11	sp|P21333|FLNA_HUMAN	Filamin-A OS=Homo sapiens GN=FLNA PE=1 SV=4	2	99	ALGALVDSCAPGLCPDWDSWDASKPVTNAR	iTRAQ8plex@N-term; Methylthio(C)@9; Methylthio(C)@14; iTRAQ8plex(K)@24		-2.85511e-05	3814.84	954.717	3814.84	954.717	4	22	8.1.1.2081.19	1	47.0552	485.754	47.0802
3	166.51	166.69	61.54	53.15	47.11	sp|P21333|FLNA_HUMAN	Filamin-A OS=Homo sapiens GN=FLNA PE=1 SV=4	2	99	ALTQTGGPHVK	iTRAQ8plex@N-term; No iTRAQ8plex(K)@11		-0.00260538	1411.81	471.609	1411.81	471.61	3	16	2.1.1.340.12	0	9.3868	380.918	9.4235
3	166.51	166.69	61.54	53.15	47.11	sp|P21333|FLNA_HUMAN	Filamin-A OS=Homo sapiens GN=FLNA PE=1 SV=4	2	99	ANLPQSFQVDTSK	No iTRAQ8plex@N-term; iTRAQ8plex(K)@13		0.00451791	1737.93	580.316	1737.92	580.314	3	14	4.1.1.1033.20	0	18.1036	573.503	18.0655
3	166.51	166.69	61.54	53.15	47.11	sp|P21333|FLNA_HUMAN	Filamin-A OS=Homo sapiens GN=FLNA PE=1 SV=4	2	99	ASGPGLNTTGVPASLPVEFTIDAK	Formyl@N-term; Deamidated(N)@7; iTRAQ8plex(K)@24		-0.0257544	2674.38	892.466	2674.4	892.474	3	14	9.1.1.1861.24	0	38.6172	297.851	38.6339
3	166.51	166.69	61.54	53.15	47.11	sp|P21333|FLNA_HUMAN	Filamin-A OS=Homo sapiens GN=FLNA PE=1 SV=4	2	99	AWGPGLEGGVVGK	iTRAQ8plex@N-term; No iTRAQ8plex(K)@13		-0.00118265	1529.85	765.932	1529.85	765.933	2	18	7.1.1.1461.27	0	23.2703	373.857	23.2201
3	166.51	166.69	61.54	53.15	47.11	sp|P21333|FLNA_HUMAN	Filamin-A OS=Homo sapiens GN=FLNA PE=1 SV=4	2	99	AYGPGIEPTGNMVK	iTRAQ8plex@N-term; iTRAQ8plex(K)@14		-0.000133299	2041.11	681.378	2041.11	681.378	3	18	3.1.1.559.27	1	18.0911	1702.76	18.0409
3	166.51	166.69	61.54	53.15	47.11	sp|P21333|FLNA_HUMAN	Filamin-A OS=Homo sapiens GN=FLNA PE=1 SV=4	2	99	CAPGVVGPAEADIDFDIIR	iTRAQ8plex@N-term; Methylthio(C)@1		0.00276423	2307.16	770.06	2307.15	770.059	3	22	9.1.1.1853.17	1	38.1104	1909.56	38.1387
3	166.51	166.69	61.54	53.15	47.11	sp|P21333|FLNA_HUMAN	Filamin-A OS=Homo sapiens GN=FLNA PE=1 SV=4	2	99	CSGPGLER	iTRAQ8plex@N-term; Methylthio(C)@1		-0.00609839	1167.56	584.788	1167.57	584.791	2	12	2.1.1.388.26	1	12.3635	863.585	12.3148
3	166.51	166.69	61.54	53.15	47.11	sp|P21333|FLNA_HUMAN	Filamin-A OS=Homo sapiens GN=FLNA PE=1 SV=4	2	99	CSGPGLSPGMVR	iTRAQ8plex@N-term; Methylthio(C)@1		-0.00146658	1509.74	755.877	1509.74	755.878	2	18	9.1.1.1584.27	1	21.5233	4006.14	21.5969
3	166.51	166.69	61.54	53.15	47.11	sp|P21333|FLNA_HUMAN	Filamin-A OS=Homo sapiens GN=FLNA PE=1 SV=4	2	99	DAGEGLLAVQITDPEGKPK	Formyl@N-term; iTRAQ8plex(K)@17; iTRAQ8plex(K)@19		-0.00355284	2573.41	858.812	2573.42	858.813	3	19	3.1.1.708.24	0	27.2708	795.652	27.2257
3	166.51	166.69	61.54	53.15	47.11	sp|P21333|FLNA_HUMAN	Filamin-A OS=Homo sapiens GN=FLNA PE=1 SV=4	2	99	DAPQDFHPDR	iTRAQ8plex@N-term		0.0133452	1500.74	501.254	1500.73	501.249	3	15	10.1.1.1373.10	1	10.3165	450.187	10.3516
3	166.51	166.69	61.54	53.15	47.11	sp|P21333|FLNA_HUMAN	Filamin-A OS=Homo sapiens GN=FLNA PE=1 SV=4	2	99	DKGEYTLVVK	iTRAQ8plex@N-term; iTRAQ8plex(K)@2; iTRAQ8plex(K)@10	missed K-G@2	-0.00770096	2063.23	516.815	2063.24	516.817	4	12	3.1.1.544.8	1	17.1323	598.774	17.0525
3	166.51	166.69	61.54	53.15	47.11	sp|P21333|FLNA_HUMAN	Filamin-A OS=Homo sapiens GN=FLNA PE=1 SV=4	2	99	DNGNGTYSCSYVPR	iTRAQ8plex@N-term; Deamidated(N)@2; Deamidated(N)@4; Methylthio(C)@9		-0.00147864	1883.8	628.939	1883.8	628.94	3	17	2.1.1.474.18	0	17.6504	1133.81	17.6153
3	166.51	166.69	61.54	53.15	47.11	sp|P21333|FLNA_HUMAN	Filamin-A OS=Homo sapiens GN=FLNA PE=1 SV=4	2	99	DVDIIDHHDNTYTVK	Formyl@N-term; iTRAQ8plex(K)@15		0.000386196	2116.04	706.353	2116.04	706.353	3	15	17.1.1.1188.7	0	44.1947	434.13	44.0525
3	166.51	166.69	61.54	53.15	47.11	sp|P21333|FLNA_HUMAN	Filamin-A OS=Homo sapiens GN=FLNA PE=1 SV=4	2	99	EAGAGGLAIAVEGPSKAEISFEDR	Formyl@N-term; iTRAQ8plex(K)@16	missed K-A@16	-0.00427411	2705.38	902.8	2705.38	902.801	3	18	4.1.1.1300.30	0	34.5798	154.999	34.5247
3	166.51	166.69	61.54	53.15	47.11	sp|P21333|FLNA_HUMAN	Filamin-A OS=Homo sapiens GN=FLNA PE=1 SV=4	2	99	EATTEFSVDAR	iTRAQ8plex@N-term		-0.98974	1527.78	764.896	1528.77	765.391	2	15	15.1.1.1643.22	0	23.5142	2274.8	22.8543
3	166.51	166.69	61.54	53.15	47.11	sp|P21333|FLNA_HUMAN	Filamin-A OS=Homo sapiens GN=FLNA PE=1 SV=4	2	99	EEPCLLK	iTRAQ8plex@N-term; Methylthio(C)@4; iTRAQ8plex(K)@7		-0.00605344	1484.81	495.945	1484.82	495.947	3	11	2.1.1.539.5	0	21.6267	418.649	21.6134
3	166.51	166.69	61.54	53.15	47.11	sp|P21333|FLNA_HUMAN	Filamin-A OS=Homo sapiens GN=FLNA PE=1 SV=4	2	99	EGPYSISVLYGDEEVPR	Formyl@N-term		0.00399447	1936.91	969.462	1936.91	969.46	2	16	5.1.1.1439.30	0	33.2138	10989.5	32.6638
3	166.51	166.69	61.54	53.15	47.11	sp|P21333|FLNA_HUMAN	Filamin-A OS=Homo sapiens GN=FLNA PE=1 SV=4	2	99	ENGVYLIDVK	iTRAQ8plex@N-term; Deamidated(N)@2; iTRAQ8plex(K)@10		-0.00758077	1757.99	587.006	1758	587.008	3	12	3.1.1.655.6	0	23.9747	562.375	24.0215
3	166.51	166.69	61.54	53.15	47.11	sp|P21333|FLNA_HUMAN	Filamin-A OS=Homo sapiens GN=FLNA PE=1 SV=4	2	99	FGGEHVPNSPFQVTALAGDQPSVQPPLR	Formyl@N-term		0.0150183	2972.49	991.838	2972.48	991.833	3	22	15.1.1.1932.30	0	41.3627	1004.06	41.3694
3	166.51	166.69	61.54	53.15	47.11	sp|P21333|FLNA_HUMAN	Filamin-A OS=Homo sapiens GN=FLNA PE=1 SV=4	2	99	FNEEHIPDSPFVVPVASPSGDAR	No iTRAQ8plex@N-term		0.0253864	2466.21	823.076	2466.18	823.068	3	17	8.1.1.1792.25	0	29.2004	451.479	29.2155
3	166.51	166.69	61.54	53.15	47.11	sp|P21333|FLNA_HUMAN	Filamin-A OS=Homo sapiens GN=FLNA PE=1 SV=4	2	99	FTVETR	iTRAQ8plex@N-term	cleaved E-F@N-term	-0.00116848	1055.59	528.803	1055.59	528.803	2	10	3.1.1.466.16	1	12.3471	686.556	12.3156
3	166.51	166.69	61.54	53.15	47.11	sp|P21333|FLNA_HUMAN	Filamin-A OS=Homo sapiens GN=FLNA PE=1 SV=4	2	99	GAGSYTIMVLFADQATPTSPIR	iTRAQ8plex@N-term		-2.98118	2596.38	866.468	2599.36	867.461	3	18	5.1.1.1591.18	0	42.581	119.101	42.4844
3	166.51	166.69	61.54	53.15	47.11	sp|P21333|FLNA_HUMAN	Filamin-A OS=Homo sapiens GN=FLNA PE=1 SV=4	2	99	GAGTGGLGLAVEGPSEAK	Formyl@N-term; iTRAQ8plex(K)@18		0.00123372	1902	952.008	1902	952.007	2	23	2.1.1.557.29	0	22.7767	4806.81	22.7851
3	166.51	166.69	61.54	53.15	47.11	sp|P21333|FLNA_HUMAN	Filamin-A OS=Homo sapiens GN=FLNA PE=1 SV=4	2	99	GKLDVQFSGLTK	iTRAQ8plex@N-term; iTRAQ8plex(K)@2; iTRAQ8plex(K)@12	missed K-L@2	-0.000584057	2204.33	552.09	2204.33	552.09	4	13	9.1.1.1631.10	1	24.3883	379.424	24.3666
3	166.51	166.69	61.54	53.15	47.11	sp|P21333|FLNA_HUMAN	Filamin-A OS=Homo sapiens GN=FLNA PE=1 SV=4	2	99	GLVEPVDVVDNADGTQTVNYVPSR	iTRAQ8plex@N-term		-5.01771	2842.44	948.487	2847.46	950.159	3	23	2.1.1.609.20	0	25.9773	81.0001	25.6227
3	166.51	166.69	61.54	53.15	47.11	sp|P21333|FLNA_HUMAN	Filamin-A OS=Homo sapiens GN=FLNA PE=1 SV=4	2	99	GLVEPVDVVDNADGTQTVNYVPSREGPYSISVLYGDEEVPR	iTRAQ8plex@N-term	missed R-E@24	0.0102078	4738.37	1185.6	4738.36	1185.6	4	24	7.1.1.1670.31	1	36.1691	632.253	36.2976
3	166.51	166.69	61.54	53.15	47.11	sp|P21333|FLNA_HUMAN	Filamin-A OS=Homo sapiens GN=FLNA PE=1 SV=4	2	99	GTVEPQLEAR	iTRAQ8plex@N-term		-0.00241305	1402.77	702.392	1402.77	702.393	2	15	11.1.1.1491.22	1	18.5983	786.572	19.0512
3	166.51	166.69	61.54	53.15	47.11	sp|P21333|FLNA_HUMAN	Filamin-A OS=Homo sapiens GN=FLNA PE=1 SV=4	2	99	HTAMVSWGGVSIPNSPFR	Formyl@N-term		0.00211767	1969.95	985.982	1969.95	985.981	2	20	4.1.1.1280.28	0	33.3387	3980.36	33.4725
3	166.51	166.69	61.54	53.15	47.11	sp|P21333|FLNA_HUMAN	Filamin-A OS=Homo sapiens GN=FLNA PE=1 SV=4	2	99	IANLQTDLSDGLR	No iTRAQ8plex@N-term		-0.000908358	1414.74	708.378	1414.74	708.378	2	15	6.1.1.1169.26	0	24.4649	320.459	24.4783
3	166.51	166.69	61.54	53.15	47.11	sp|P21333|FLNA_HUMAN	Filamin-A OS=Homo sapiens GN=FLNA PE=1 SV=4	2	99	IQQNTFTR	iTRAQ8plex@N-term		0.000257479	1310.73	656.37	1310.72	656.37	2	14	2.1.1.379.31	0	11.8167	3768.64	11.7598
3	166.51	166.69	61.54	53.15	47.11	sp|P21333|FLNA_HUMAN	Filamin-A OS=Homo sapiens GN=FLNA PE=1 SV=4	2	99	IVGPSGAAVPCK	Formyl@N-term; Methylthio(C)@11; iTRAQ8plex(K)@12		-0.00607335	1475.77	738.893	1475.78	738.896	2	18	9.1.1.1705.22	0	28.9779	1759.03	28.9979
3	166.51	166.69	61.54	53.15	47.11	sp|P21333|FLNA_HUMAN	Filamin-A OS=Homo sapiens GN=FLNA PE=1 SV=4	2	99	IVGPSGAAVPCKVEPGLGADNSVVR	Formyl@N-term; Methylthio(C)@11; iTRAQ8plex(K)@12; Deamidated(N)@21	missed K-V@12	0.00369991	2770.43	924.485	2770.43	924.484	3	14	10.1.1.1741.28	0	33.0362	2095.81	33.0463
3	166.51	166.69	61.54	53.15	47.11	sp|P21333|FLNA_HUMAN	Filamin-A OS=Homo sapiens GN=FLNA PE=1 SV=4	2	99	KTHIQDNHDGTYTVAYVPDVTGR	iTRAQ8plex@N-term; iTRAQ8plex(K)@1	missed K-T@1	0.0438673	3194.7	639.947	3194.66	639.939	5	12	5.1.1.1323.11	1	26.0482	477.944	26.0247
3	166.51	166.69	61.54	53.15	47.11	sp|P21333|FLNA_HUMAN	Filamin-A OS=Homo sapiens GN=FLNA PE=1 SV=4	2	99	LDVQFSGLTK	iTRAQ8plex@N-term; iTRAQ8plex(K)@10		-0.0108288	1715	572.673	1715.01	572.677	3	14	10.1.1.1657.12	1	27.8249	899.011	27.7381
3	166.51	166.69	61.54	53.15	47.11	sp|P21333|FLNA_HUMAN	Filamin-A OS=Homo sapiens GN=FLNA PE=1 SV=4	2	99	LIALLEVLSQK	Formyl@N-term; iTRAQ8plex(K)@11		0.00320396	1557.97	779.991	1557.96	779.99	2	16	18.1.1.1289.5	0	47.3993	3197.2	47.3862
3	166.51	166.69	61.54	53.15	47.11	sp|P21333|FLNA_HUMAN	Filamin-A OS=Homo sapiens GN=FLNA PE=1 SV=4	2	99	LLGWIQNK	Formyl@N-term; iTRAQ8plex(K)@8		-0.00598723	1302.75	652.384	1302.76	652.387	2	10	5.1.1.1532.3	0	38.9081	1415.06	39.0216
3	166.51	166.69	61.54	53.15	47.11	sp|P21333|FLNA_HUMAN	Filamin-A OS=Homo sapiens GN=FLNA PE=1 SV=4	2	99	LPQLPITNFSR	iTRAQ8plex@N-term		0.00148648	1588.93	530.649	1588.92	530.649	3	14	2.1.1.697.6	1	31.37	3822.11	31.4785
3	166.51	166.69	61.54	53.15	47.11	sp|P21333|FLNA_HUMAN	Filamin-A OS=Homo sapiens GN=FLNA PE=1 SV=4	2	99	LQVEPAVDTSGVQCYGPGIEGQGVFR	iTRAQ8plex@N-term; Methylthio(C)@14		-1.01688	3054.49	1019.17	3055.5	1019.51	3	23	10.1.1.1759.29	0	34.1495	891.387	34.1579
3	166.51	166.69	61.54	53.15	47.11	sp|P21333|FLNA_HUMAN	Filamin-A OS=Homo sapiens GN=FLNA PE=1 SV=4	2	99	LSPFMADIR	iTRAQ8plex@N-term		-0.00107696	1352.74	451.921	1352.74	451.922	3	10	18.1.1.1148.4	1	38.6012	267.836	38.5894
3	166.51	166.69	61.54	53.15	47.11	sp|P21333|FLNA_HUMAN	Filamin-A OS=Homo sapiens GN=FLNA PE=1 SV=4	2	99	PSGNLTETYVQDR	Formyl@N-term	cleaved N-P@N-term	0.0206711	1506.72	754.365	1506.7	754.355	2	16	15.1.1.1568.26	0	18.8818	455.359	18.9568
3	166.51	166.69	61.54	53.15	47.11	sp|P21333|FLNA_HUMAN	Filamin-A OS=Homo sapiens GN=FLNA PE=1 SV=4	2	99	RIANLQTDLSDGLR	Formyl@N-term	missed R-I@1	-0.00776245	1598.83	800.422	1598.84	800.426	2	24	6.1.1.1228.23	0	28.0997	1388.67	28.118
3	166.51	166.69	61.54	53.15	47.11	sp|P21333|FLNA_HUMAN	Filamin-A OS=Homo sapiens GN=FLNA PE=1 SV=4	2	99	RLTVSSLQESGLK	Formyl@N-term; iTRAQ8plex(K)@13	missed R-L@1	-0.0108088	1748.98	584.002	1748.99	584.005	3	18	7.1.1.1479.12	0	24.3526	1486.67	24.3277
3	166.51	166.69	61.54	53.15	47.11	sp|P21333|FLNA_HUMAN	Filamin-A OS=Homo sapiens GN=FLNA PE=1 SV=4	2	99	SADFVVEAIGDDVGTLGFSVEGPSQAK	Formyl@N-term; iTRAQ8plex(K)@27		0.00797361	3026.51	1009.84	3026.5	1009.84	3	12	9.1.1.1999.22	0	47.155	1298.15	47.1125
3	166.51	166.69	61.54	53.15	47.11	sp|P21333|FLNA_HUMAN	Filamin-A OS=Homo sapiens GN=FLNA PE=1 SV=4	2	99	SPFSVAVSPSLDLSK	iTRAQ8plex@N-term; iTRAQ8plex(K)@15		-0.0132092	2141.21	714.743	2141.22	714.747	3	16	15.1.1.1970.12	0	43.6819	540.572	43.5948
3	166.51	166.69	61.54	53.15	47.11	sp|P21333|FLNA_HUMAN	Filamin-A OS=Homo sapiens GN=FLNA PE=1 SV=4	2	99	SPYTVTVGQACNPSACR	Formyl@N-term; Methylthio(C)@11; Methylthio(C)@16		0.0109215	1872.77	937.394	1872.76	937.389	2	16	15.1.1.1791.31	0	32.6707	463.345	32.7375
3	166.51	166.69	61.54	53.15	47.11	sp|P21333|FLNA_HUMAN	Filamin-A OS=Homo sapiens GN=FLNA PE=1 SV=4	2	99	TGVAVNKPAEFTVDAK	iTRAQ8plex@N-term; iTRAQ8plex(K)@7; iTRAQ8plex(K)@16		-0.00716061	2558.48	640.626	2558.48	640.628	4	19	4.1.1.1063.24	1	19.9619	1580.9	19.795
3	166.51	166.69	61.54	53.15	47.11	sp|P21333|FLNA_HUMAN	Filamin-A OS=Homo sapiens GN=FLNA PE=1 SV=4	2	99	TGVELGKPTHFTVNAK	Formyl@N-term; iTRAQ8plex(K)@7; iTRAQ8plex(K)@16		0.00380175	2334.32	584.587	2334.32	584.586	4	13	7.1.1.1463.14	0	23.3722	1282.16	23.282
3	166.51	166.69	61.54	53.15	47.11	sp|P21333|FLNA_HUMAN	Filamin-A OS=Homo sapiens GN=FLNA PE=1 SV=4	2	99	THIQDNHDGTYTVAYVPDVTGR	Arg-add@N-term		-0.00600835	2614.25	654.569	2614.25	654.57	4	17	3.1.1.586.20	0	19.746	354.928	19.7075
3	166.51	166.69	61.54	53.15	47.11	sp|P21333|FLNA_HUMAN	Filamin-A OS=Homo sapiens GN=FLNA PE=1 SV=4	2	99	TPCEEILVK	iTRAQ8plex@N-term; Methylthio(C)@3; iTRAQ8plex(K)@9		-0.0187785	1684.92	843.466	1684.94	843.475	2	11	7.1.1.1575.23	0	30.2937	522.538	30.1885
3	166.51	166.69	61.54	53.15	47.11	sp|P21333|FLNA_HUMAN	Filamin-A OS=Homo sapiens GN=FLNA PE=1 SV=4	2	99	VANPSGNLTETYVQDR	iTRAQ8plex@N-term		0.0034861	2067.06	1034.54	2067.05	1034.53	2	22	20.1.1.874.31	1	17.6617	2386.59	17.9783
3	166.51	166.69	61.54	53.15	47.11	sp|P21333|FLNA_HUMAN	Filamin-A OS=Homo sapiens GN=FLNA PE=1 SV=4	2	99	VEPGLGADNSVVR	Formyl@N-term		0.0049005	1339.68	670.846	1339.67	670.844	2	15	16.1.1.788.19	0	19.3257	2915.52	19.3509
3	166.51	166.69	61.54	53.15	47.11	sp|P21333|FLNA_HUMAN	Filamin-A OS=Homo sapiens GN=FLNA PE=1 SV=4	2	99	VGSAADIPINISETDLSLLTATVVPPSGR	Formyl@N-term		0.00486856	2920.54	974.522	2920.54	974.52	3	17	20.1.1.1347.22	0	47.063	2647.58	47.0207
3	166.51	166.69	61.54	53.15	47.11	sp|P21333|FLNA_HUMAN	Filamin-A OS=Homo sapiens GN=FLNA PE=1 SV=4	2	99	VHSPSGALEECYVTEIDQDKYAVR	Formyl@N-term; Methylthio(C)@11; iTRAQ8plex(K)@20	missed K-Y@20	0.0371249	3086.5	772.632	3086.46	772.623	4	16	5.1.1.1441.14	0	33.3108	358.892	33.3441
3	166.51	166.69	61.54	53.15	47.11	sp|P21333|FLNA_HUMAN	Filamin-A OS=Homo sapiens GN=FLNA PE=1 SV=4	2	99	VLPTHDASK	iTRAQ8plex@N-term; iTRAQ8plex(K)@9		-0.00590618	1574.92	394.737	1574.92	394.738	4	12	3.1.1.446.8	1	11.1004	1381.85	11.1438
3	166.51	166.69	61.54	53.15	47.11	sp|P21333|FLNA_HUMAN	Filamin-A OS=Homo sapiens GN=FLNA PE=1 SV=4	2	99	VQVQDNEGCPVEALVK	iTRAQ8plex@N-term; Methylthio(C)@9; iTRAQ8plex(K)@16		0.00634693	2381.26	596.322	2381.25	596.321	4	17	4.1.1.1219.7	1	29.542	2533.37	29.5871
3	166.51	166.69	61.54	53.15	47.11	sp|P21333|FLNA_HUMAN	Filamin-A OS=Homo sapiens GN=FLNA PE=1 SV=4	2	99	VQVQDNEGCPVEALVKDNGNGTYSCSYVPR	iTRAQ8plex@N-term; Methylthio(C)@9; iTRAQ8plex(K)@16; Deamidated(N)@18; Deamidated(N)@20; Methylthio(C)@25	missed K-D@16	0.0377901	3942.87	986.726	3942.84	986.716	4	18	6.1.1.1332.25	0	34.5135	186.915	34.4666
3	166.51	166.69	61.54	53.15	47.11	sp|P21333|FLNA_HUMAN	Filamin-A OS=Homo sapiens GN=FLNA PE=1 SV=4	2	99	VSGQGLHEGHTFEPAEFIIDTR	Formyl@N-term		0.00414315	2467.18	823.401	2467.18	823.4	3	24	7.1.1.1607.24	0	32.2669	2386.25	32.4065
3	166.51	166.69	61.54	53.15	47.11	sp|P21333|FLNA_HUMAN	Filamin-A OS=Homo sapiens GN=FLNA PE=1 SV=4	2	99	VTAQGPGLEPSGNIANK	iTRAQ8plex@N-term; iTRAQ8plex(K)@17		0.0134272	2260.28	754.433	2260.26	754.429	3	16	2.1.1.467.30	1	17.2404	1282.99	17.1234
3	166.51	166.69	61.54	53.15	47.11	sp|P21333|FLNA_HUMAN	Filamin-A OS=Homo sapiens GN=FLNA PE=1 SV=4	2	99	VYGPGVAK	iTRAQ8plex@N-term; iTRAQ8plex(K)@8		-0.00140941	1397.85	466.957	1397.85	466.957	3	14	3.1.1.466.6	1	12.3304	4114.69	12.4385
3	166.51	166.69	61.54	53.15	47.11	sp|P21333|FLNA_HUMAN	Filamin-A OS=Homo sapiens GN=FLNA PE=1 SV=4	2	99	WGDEHIPGSPYR	Formyl@N-term		-0.00423568	1440.64	721.326	1440.64	721.328	2	17	4.1.1.1061.26	0	19.8428	14473.1	19.8562
3	166.51	166.69	61.54	53.15	47.11	sp|P21333|FLNA_HUMAN	Filamin-A OS=Homo sapiens GN=FLNA PE=1 SV=4	2	99	YAPSEAGLHEMDIR	iTRAQ8plex@N-term		0.0101302	1891.95	631.658	1891.94	631.654	3	19	2.1.1.488.24	1	18.5254	768.918	18.5421
3	166.51	166.69	61.54	53.15	47.11	sp|P21333|FLNA_HUMAN	Filamin-A OS=Homo sapiens GN=FLNA PE=1 SV=4	2	99	YGGDEIPFSPYR	No iTRAQ8plex@N-term		0.0011601	1399.64	700.828	1399.64	700.828	2	15	5.1.1.1280.27	0	23.4169	656.53	23.4286
3	166.51	166.69	61.54	53.15	47.11	sp|P21333|FLNA_HUMAN	Filamin-A OS=Homo sapiens GN=FLNA PE=1 SV=4	2	99	YGGDEIPFSPYRVR	iTRAQ8plex@N-term	missed R-V@12	-0.00588225	1959.01	654.011	1959.02	654.013	3	14	9.1.1.1633.21	1	24.5303	922.869	24.5521
3	166.51	166.69	61.54	53.15	47.11	sp|P21333|FLNA_HUMAN	Filamin-A OS=Homo sapiens GN=FLNA PE=1 SV=4	2	99	YGGQPVPNFPSK	iTRAQ8plex@N-term; iTRAQ8plex(K)@12		0.0050379	1898.06	633.693	1898.05	633.691	3	13	6.1.1.1108.25	1	20.7022	341.17	20.6556
3	166.51	166.69	61.54	53.15	47.11	sp|P21333|FLNA_HUMAN	Filamin-A OS=Homo sapiens GN=FLNA PE=1 SV=4	2	99	YNEQHVPGSPFTAR	Formyl@N-term		0.00725338	1629.76	815.888	1629.75	815.884	2	18	4.1.1.1013.31	0	16.8895	8711.79	16.8945
3	166.51	166.69	61.54	53.15	47.11	sp|P21333|FLNA_HUMAN	Filamin-A OS=Homo sapiens GN=FLNA PE=1 SV=4	2	99	YTPVQQGPVGVNVTYGGDPIPK	iTRAQ8plex@N-term; No iTRAQ8plex(K)@22		0.0371707	2589.41	864.144	2589.37	864.132	3	18	6.1.1.1204.29	0	26.6303	240.981	26.577
3	166.51	166.69	61.54	53.15	47.11	sp|P21333|FLNA_HUMAN	Filamin-A OS=Homo sapiens GN=FLNA PE=1 SV=4	2	99	YWPQEAGEYAVHVLCNSEDIR	Formyl@N-term; Methylthio(C)@15		-0.00142336	2552.11	851.71	2552.11	851.711	3	13	20.1.1.2809.12	0	58.0144	632.053	57.9885
3	166.51	166.69	61.54	53.15	47.11	sp|P21333|FLNA_HUMAN	Filamin-A OS=Homo sapiens GN=FLNA PE=1 SV=4	1.88606	99	LVSIDSK	iTRAQ8plex@N-term; iTRAQ8plex(K)@7		-0.00102283	1368.84	457.288	1368.84	457.289	3	12	6.1.1.1102.7	0	20.3028	453.613	20.2866
3	166.51	166.69	61.54	53.15	47.11	sp|P21333|FLNA_HUMAN	Filamin-A OS=Homo sapiens GN=FLNA PE=1 SV=4	0.850781	99	EAGAGGLAIAVEGPSK	Formyl@N-term; iTRAQ8plex(K)@16		-0.00312588	1757.94	879.979	1757.95	879.981	2	18	2.1.1.580.31	0	24.1965	1536.2	24.2015
3	166.51	166.69	61.54	53.15	47.11	sp|P21333|FLNA_HUMAN	Filamin-A OS=Homo sapiens GN=FLNA PE=1 SV=4	0.850781	99	LKPGAPLRPK	Formyl@N-term; iTRAQ8plex(K)@2; iTRAQ8plex(K)@10		-0.0096351	1712.08	571.702	1712.09	571.705	3	12	7.1.1.1386.23	0	18.6533	621.876	18.61
3	166.51	166.69	61.54	53.15	47.11	sp|P21333|FLNA_HUMAN	Filamin-A OS=Homo sapiens GN=FLNA PE=1 SV=4	0.528708	99	VKAEGPGLSR	Formyl@N-term; iTRAQ8plex(K)@2	missed K-A@2	0.000254769	1344.77	673.391	1344.77	673.391	2	16	17.1.1.708.27	0	14.3939	3218.95	14.4681
3	166.51	166.69	61.54	53.15	47.11	sp|P21333|FLNA_HUMAN	Filamin-A OS=Homo sapiens GN=FLNA PE=1 SV=4	0.414539	99	YGGPYHIGGSPFK	Formyl@N-term; iTRAQ8plex(K)@13		0.000491396	1710.87	571.297	1710.87	571.296	3	13	11.1.1.1714.11	0	32.3332	458.522	32.2478
3	166.51	166.69	61.54	53.15	47.11	sp|P21333|FLNA_HUMAN	Filamin-A OS=Homo sapiens GN=FLNA PE=1 SV=4	0.396856	99	RAEFTVETR	Formyl@N-term	missed R-A@1	-0.00365315	1135.56	568.787	1135.56	568.788	2	14	13.1.1.1594.11	0	23.1331	305.201	23.1715
3	166.51	166.69	61.54	53.15	47.11	sp|P21333|FLNA_HUMAN	Filamin-A OS=Homo sapiens GN=FLNA PE=1 SV=4	0.28735	99	DGSCGVAYVVQEPGDYEVSVK	Formyl@N-term; Methylthio(C)@4; iTRAQ8plex(K)@21		0.0158539	2578.2	860.408	2578.19	860.403	3	16	4.1.1.1234.22	0	30.4945	701.932	30.4527
3	166.51	166.69	61.54	53.15	47.11	sp|P21333|FLNA_HUMAN	Filamin-A OS=Homo sapiens GN=FLNA PE=1 SV=4	0.249492	99	ATCAPQHGAPGPGPADASK	Formyl@N-term; Methylthio(C)@3; iTRAQ8plex(K)@19		0.00664509	2109.99	704.339	2109.99	704.337	3	18	18.1.1.788.27	0	16.2423	901.035	16.3164
3	166.51	166.69	61.54	53.15	47.11	sp|P21333|FLNA_HUMAN	Filamin-A OS=Homo sapiens GN=FLNA PE=1 SV=4	0.235824	99	WGDEHIPGSPYRVVVP	Formyl@N-term	missed R-V@12	0.0109716	1834.91	918.463	1834.9	918.457	2	12	10.1.1.1735.26	0	32.6622	851.395	32.6136
3	166.51	166.69	61.54	53.15	47.11	sp|P21333|FLNA_HUMAN	Filamin-A OS=Homo sapiens GN=FLNA PE=1 SV=4	0.218963	99	LYSVSYLLK	Formyl@N-term; iTRAQ8plex(K)@9		-0.00655282	1416.81	709.413	1416.82	709.416	2	14	3.1.1.891.10	0	38.5277	6753.78	38.5066
3	166.51	166.69	61.54	53.15	47.11	sp|P21333|FLNA_HUMAN	Filamin-A OS=Homo sapiens GN=FLNA PE=1 SV=4	0.169411	99	VHGPGIQSGTTNKPNKFTVETR	Formyl@N-term; iTRAQ8plex(K)@13; iTRAQ8plex(K)@16	missed K-F@16	0.014536	3003.65	751.92	3003.64	751.916	4	14	5.1.1.1211.29	0	19.1642	1565.85	19.2344
3	166.51	166.69	61.54	53.15	47.11	sp|P21333|FLNA_HUMAN	Filamin-A OS=Homo sapiens GN=FLNA PE=1 SV=4	0.106793	99	LTVSSLQESGLK	Formyl@N-term; iTRAQ8plex(K)@12		-0.00717913	1592.89	797.45	1592.89	797.454	2	14	8.1.1.1791.23	0	29.1359	460.663	29.1543
3	166.51	166.69	61.54	53.15	47.11	sp|P21333|FLNA_HUMAN	Filamin-A OS=Homo sapiens GN=FLNA PE=1 SV=4	0.0710923	99	VDVGKDQEFTVK	Formyl@N-term; iTRAQ8plex(K)@5; iTRAQ8plex(K)@12	missed K-D@5	-0.00187394	2000.1	667.708	2000.1	667.709	3	13	19.1.1.1004.11	0	27.9094	1054.05	27.6362
3	166.51	166.69	61.54	53.15	47.11	sp|P21333|FLNA_HUMAN	Filamin-A OS=Homo sapiens GN=FLNA PE=1 SV=4	0.0472076	99	QMQLENVSVALEFLDR	Formyl@N-term		0.00565918	1918.95	960.483	1918.95	960.48	2	13	16.1.1.1209.29	0	45.5569	124.701	45.4403
3	166.51	166.69	61.54	53.15	47.11	sp|P21333|FLNA_HUMAN	Filamin-A OS=Homo sapiens GN=FLNA PE=1 SV=4	0.033389	99	IKVSGLGEK	Formyl@N-term; iTRAQ8plex(K)@2; iTRAQ8plex(K)@9	missed K-V@2	-0.00341254	1565.96	522.993	1565.96	522.994	3	13	6.1.1.1108.15	0	20.6856	804.412	20.6556
3	166.51	166.69	61.54	53.15	47.11	sp|P21333|FLNA_HUMAN	Filamin-A OS=Homo sapiens GN=FLNA PE=1 SV=4	0.011441	99	SSFTVDCSK	iTRAQ8plex@N-term; Methylthio(C)@7; No iTRAQ8plex(K)@9		0.00333149	1322.62	662.317	1322.62	662.315	2	15	6.1.1.1081.28	0	19.0438	349.008	19.0538
3	166.51	166.69	61.54	53.15	47.11	sp|P21333|FLNA_HUMAN	Filamin-A OS=Homo sapiens GN=FLNA PE=1 SV=4	0.0070049	99	FGGEHVPNSPFQVTALAGDQPSVQPPL	Formyl@N-term	cleaved L-R@C-term	0.011796	2816.39	939.803	2816.38	939.8	3	15	16.1.1.1125.24	0	40.3067	1872.82	40.3236
3	166.51	166.69	61.54	53.15	47.11	sp|P21333|FLNA_HUMAN	Filamin-A OS=Homo sapiens GN=FLNA PE=1 SV=4	0.137869	98.86	AVPTGDASK	iTRAQ8plex@N-term; iTRAQ8plex(K)@9		-0.0113166	1452.83	485.283	1452.84	485.287	3	11	15.1.1.1505.13	0	14.9968	172.176	14.97
3	166.51	166.69	61.54	53.15	47.11	sp|P21333|FLNA_HUMAN	Filamin-A OS=Homo sapiens GN=FLNA PE=1 SV=4	0.00174066	98.78	RLTVSSLQESGLKVNQPAS	iTRAQ8plex@N-term; iTRAQ8plex(K)@13	cleaved S-F@C-term; missed R-L@1; missed K-V@13	1.97709	2623.47	875.498	2621.5	874.839	3	13	8.1.1.1699.31	0	23.4697	1105.21	23.5362
3	166.51	166.69	61.54	53.15	47.11	sp|P21333|FLNA_HUMAN	Filamin-A OS=Homo sapiens GN=FLNA PE=1 SV=4	1.52288	98.59	AGGPGLER	iTRAQ8plex@N-term		-0.00448194	1059.59	530.804	1059.6	530.806	2	13	10.1.1.1353.21	0	9.101	2246	9.1227
3	166.51	166.69	61.54	53.15	47.11	sp|P21333|FLNA_HUMAN	Filamin-A OS=Homo sapiens GN=FLNA PE=1 SV=4	0.0245682	98.54	SAGQGEVLVYVEDPAGHQEEAK	Formyl@N-term; iTRAQ8plex(K)@22		0.00688264	2644.3	882.44	2644.29	882.438	3	12	17.1.1.952.22	0	29.5658	105.332	29.7098
3	166.51	166.69	61.54	53.15	47.11	sp|P21333|FLNA_HUMAN	Filamin-A OS=Homo sapiens GN=FLNA PE=1 SV=4	1.48149	98.45	AEGPGLSR	iTRAQ8plex@N-term		-0.00120543	1089.61	545.811	1089.61	545.812	2	13	10.1.1.1355.26	1	9.2327	508.066	9.1843
3	166.51	166.69	61.54	53.15	47.11	sp|P21333|FLNA_HUMAN	Filamin-A OS=Homo sapiens GN=FLNA PE=1 SV=4	1.4437	98.31	VTGDDSMR	iTRAQ8plex@N-term		-0.00313407	1183.58	592.796	1183.58	592.798	2	12	9.1.1.1391.21	1	9.6341	652.322	9.5782
3	166.51	166.69	61.54	53.15	47.11	sp|P21333|FLNA_HUMAN	Filamin-A OS=Homo sapiens GN=FLNA PE=1 SV=4	0.341989	97.4	GGVSIPNSPFR	iTRAQ8plex@N-term	cleaved W-G@N-term	0.0053408	1433.8	478.94	1433.79	478.938	3	10	9.1.1.1603.9	0	22.6632	165.049	22.7667
3	166.51	166.69	61.54	53.15	47.11	sp|P21333|FLNA_HUMAN	Filamin-A OS=Homo sapiens GN=FLNA PE=1 SV=4	0.0105502	96.68	AHVVPCFDASK	Formyl@N-term; Methylthio(C)@6; iTRAQ8plex(K)@11		0.00617919	1550.76	517.927	1550.75	517.925	3	11	11.1.1.1760.7	0	35.1637	227.745	35.0852
3	166.51	166.69	61.54	53.15	47.11	sp|P21333|FLNA_HUMAN	Filamin-A OS=Homo sapiens GN=FLNA PE=1 SV=4	0.000869459	96.54	MLLVGVHGPR	Formyl@N-term	cleaved N-M@N-term	-0.00686272	1105.6	553.807	1105.61	553.811	2	13	2.1.1.630.4	0	27.2293	110.321	27.2793
3	166.51	166.69	61.54	53.15	47.11	sp|P21333|FLNA_HUMAN	Filamin-A OS=Homo sapiens GN=FLNA PE=1 SV=4	0.00130484	95.88	VNQPASFAVSLNGAK	Formyl@N-term; Deamidated(N)@12; iTRAQ8plex(K)@15		-0.00346823	1834.97	918.492	1834.97	918.494	2	13	7.1.1.1537.31	0	27.9656	1310.74	27.909
4	135.98	136.58	93.56	86.48	84.98	sp|P08670|VIME_HUMAN	Vimentin OS=Homo sapiens GN=VIM PE=1 SV=4	2	99	DGQVINETSQHHDDLE	No iTRAQ8plex@N-term		0.0193023	1835.81	612.944	1835.79	612.938	3	14	7.1.1.1272.11	0	11.6534	657.797	11.5515
4	135.98	136.58	93.56	86.48	84.98	sp|P08670|VIME_HUMAN	Vimentin OS=Homo sapiens GN=VIM PE=1 SV=4	2	99	DNLAEDIMR	iTRAQ8plex@N-term		-0.004039	1379.7	690.856	1379.7	690.858	2	13	18.1.1.1024.16	1	30.8962	307.44	30.9265
4	135.98	136.58	93.56	86.48	84.98	sp|P08670|VIME_HUMAN	Vimentin OS=Homo sapiens GN=VIM PE=1 SV=4	2	99	EEAENTLQSFR	iTRAQ8plex@N-term		-0.00128986	1626.81	543.279	1626.82	543.279	3	15	19.1.1.916.6	1	22.4225	1353.91	23.0269
4	135.98	136.58	93.56	86.48	84.98	sp|P08670|VIME_HUMAN	Vimentin OS=Homo sapiens GN=VIM PE=1 SV=4	2	99	EEAENTLQSFRQDVDNASLAR	Formyl@N-term	missed R-Q@11	0.0171007	2420.14	807.72	2420.12	807.714	3	22	2.1.1.663.20	0	29.2912	1709.84	29.253
4	135.98	136.58	93.56	86.48	84.98	sp|P08670|VIME_HUMAN	Vimentin OS=Homo sapiens GN=VIM PE=1 SV=4	2	99	EKLQEEMLQREEAENTLQSFR	Formyl@N-term; iTRAQ8plex(K)@2	missed K-L@2; missed R-E@10	0.00294468	2939.46	980.828	2939.46	980.827	3	20	2.1.1.609.22	0	25.9839	743.827	25.9312
4	135.98	136.58	93.56	86.48	84.98	sp|P08670|VIME_HUMAN	Vimentin OS=Homo sapiens GN=VIM PE=1 SV=4	2	99	EMEENFAVEAANYQDTIGR	Glu->pyro-Glu@N-term		0.00187487	2167.95	1084.98	2167.95	1084.98	2	21	2.1.1.648.30	0	28.3821	1105.16	28.327
4	135.98	136.58	93.56	86.48	84.98	sp|P08670|VIME_HUMAN	Vimentin OS=Homo sapiens GN=VIM PE=1 SV=4	2	99	ETNLDSLPLVDTHSK	Formyl@N-term; iTRAQ8plex(K)@15		-0.00494905	2000.03	667.685	2000.04	667.686	3	17	3.1.1.679.12	0	25.4638	10982.6	25.2557
4	135.98	136.58	93.56	86.48	84.98	sp|P08670|VIME_HUMAN	Vimentin OS=Homo sapiens GN=VIM PE=1 SV=4	2	99	ETNLDSLPLVDTHSKR	Formyl@N-term; iTRAQ8plex(K)@15	missed K-R@15	-0.00761978	2156.13	719.717	2156.14	719.72	3	17	4.1.1.1128.21	0	23.9512	6938.72	23.7876
4	135.98	136.58	93.56	86.48	84.98	sp|P08670|VIME_HUMAN	Vimentin OS=Homo sapiens GN=VIM PE=1 SV=4	2	99	EYQDLLNVK	iTRAQ8plex@N-term; iTRAQ8plex(K)@9		-0.00419246	1728.98	577.335	1728.99	577.336	3	14	6.1.1.1178.11	1	24.996	3208.91	25.0344
4	135.98	136.58	93.56	86.48	84.98	sp|P08670|VIME_HUMAN	Vimentin OS=Homo sapiens GN=VIM PE=1 SV=4	2	99	FADLSEAANR	No iTRAQ8plex@N-term		-0.00173532	1092.52	547.266	1092.52	547.267	2	13	2.1.1.377.25	0	11.6827	1486.18	11.6358
4	135.98	136.58	93.56	86.48	84.98	sp|P08670|VIME_HUMAN	Vimentin OS=Homo sapiens GN=VIM PE=1 SV=4	2	99	FADLSEAANRNNDALR	No iTRAQ8plex@N-term; Deamidated(N)@11	missed R-N@10	0.0146688	1776.85	593.292	1776.84	593.287	3	13	2.1.1.425.24	0	14.6355	539.525	14.591
4	135.98	136.58	93.56	86.48	84.98	sp|P08670|VIME_HUMAN	Vimentin OS=Homo sapiens GN=VIM PE=1 SV=4	2	99	FGGPGTASRPSS	iTRAQ8plex@N-term	cleaved M-F@N-term; cleaved S-S@C-term	-0.00297226	1423.73	712.874	1423.74	712.875	2	15	20.1.1.742.23	0	9.4675	763.976	9.4727
4	135.98	136.58	93.56	86.48	84.98	sp|P08670|VIME_HUMAN	Vimentin OS=Homo sapiens GN=VIM PE=1 SV=4	2	99	FGGPGTASRPSSSR	Formyl@N-term	cleaved M-F@N-term	0.00463776	1390.66	696.339	1390.66	696.337	2	14	16.1.1.636.31	0	9.9162	2373.54	9.8591
4	135.98	136.58	93.56	86.48	84.98	sp|P08670|VIME_HUMAN	Vimentin OS=Homo sapiens GN=VIM PE=1 SV=4	2	99	GSALRPSTSR	Formyl@N-term	cleaved L-G@N-term	-0.00146383	1058.55	530.28	1058.55	530.281	2	14	7.1.1.1223.29	0	8.7322	1725.87	8.6791
4	135.98	136.58	93.56	86.48	84.98	sp|P08670|VIME_HUMAN	Vimentin OS=Homo sapiens GN=VIM PE=1 SV=4	2	99	GTNESLER	iTRAQ8plex@N-term		-0.00851821	1208.62	605.318	1208.63	605.322	2	13	4.1.1.849.30	1	6.8017	265.856	6.8068
4	135.98	136.58	93.56	86.48	84.98	sp|P08670|VIME_HUMAN	Vimentin OS=Homo sapiens GN=VIM PE=1 SV=4	2	99	ILLAELEQLKGQGK	Formyl@N-term; iTRAQ8plex(K)@10; iTRAQ8plex(K)@14	missed K-G@10	-0.0046888	2175.3	726.109	2175.31	726.11	3	16	20.1.1.1311.12	0	44.797	1816.9	44.1478
4	135.98	136.58	93.56	86.48	84.98	sp|P08670|VIME_HUMAN	Vimentin OS=Homo sapiens GN=VIM PE=1 SV=4	2	99	ISLPLPNFSSL	iTRAQ8plex@N-term	cleaved L-N@C-term	-0.0134669	1490.85	746.433	1490.87	746.44	2	12	5.1.1.1631.10	0	45.0477	647.656	45.0877
4	135.98	136.58	93.56	86.48	84.98	sp|P08670|VIME_HUMAN	Vimentin OS=Homo sapiens GN=VIM PE=1 SV=4	2	99	ISLPLPNFSSLNLR	iTRAQ8plex@N-term		-0.0109063	1874.08	938.048	1874.09	938.054	2	15	8.1.1.2008.25	1	42.5487	7651.52	42.2547
4	135.98	136.58	93.56	86.48	84.98	sp|P08670|VIME_HUMAN	Vimentin OS=Homo sapiens GN=VIM PE=1 SV=4	2	99	KLLEGEESR	iTRAQ8plex@N-term; iTRAQ8plex(K)@1	missed K-L@1	-0.000890633	1667.97	556.996	1667.97	556.996	3	10	20.1.1.1015.5	1	26.3796	347.612	26.4282
4	135.98	136.58	93.56	86.48	84.98	sp|P08670|VIME_HUMAN	Vimentin OS=Homo sapiens GN=VIM PE=1 SV=4	2	99	KVESLQEEIAFLK	iTRAQ8plex@N-term; iTRAQ8plex(K)@1; iTRAQ8plex(K)@13	missed K-V@1	-0.0189854	2445.44	612.368	2445.46	612.373	4	16	7.1.1.1656.4	1	35.2618	504.93	35.25
4	135.98	136.58	93.56	86.48	84.98	sp|P08670|VIME_HUMAN	Vimentin OS=Homo sapiens GN=VIM PE=1 SV=4	2	99	LGDLYEEEMR	No iTRAQ8plex@N-term		0.000957774	1253.56	627.788	1253.56	627.787	2	12	16.1.1.805.15	0	20.3794	465.325	20.2866
4	135.98	136.58	93.56	86.48	84.98	sp|P08670|VIME_HUMAN	Vimentin OS=Homo sapiens GN=VIM PE=1 SV=4	2	99	LGDLYEEEMRELR	iTRAQ8plex@N-term	missed R-E@10	-0.00417625	1955.99	653.004	1955.99	653.005	3	14	3.1.1.792.10	1	32.4228	1201.5	32.0917
4	135.98	136.58	93.56	86.48	84.98	sp|P08670|VIME_HUMAN	Vimentin OS=Homo sapiens GN=VIM PE=1 SV=4	2	99	LLEGEESR	iTRAQ8plex@N-term		-0.00271443	1235.66	618.839	1235.67	618.841	2	12	18.1.1.881.10	0	22.0036	2249.47	21.6079
4	135.98	136.58	93.56	86.48	84.98	sp|P08670|VIME_HUMAN	Vimentin OS=Homo sapiens GN=VIM PE=1 SV=4	2	99	LQDEIQNMKEEMAR	Formyl@N-term; iTRAQ8plex(K)@9	missed K-E@9	0.0013016	2066.01	689.677	2066.01	689.677	3	17	6.1.1.1316.6	0	33.4921	3283.35	33.3532
4	135.98	136.58	93.56	86.48	84.98	sp|P08670|VIME_HUMAN	Vimentin OS=Homo sapiens GN=VIM PE=1 SV=4	2	99	LQEEMLQR	iTRAQ8plex@N-term		0.0067829	1349.73	675.875	1349.73	675.871	2	12	20.1.1.900.21	1	19.2645	568.688	19.3486
4	135.98	136.58	93.56	86.48	84.98	sp|P08670|VIME_HUMAN	Vimentin OS=Homo sapiens GN=VIM PE=1 SV=4	2	99	LQEEMLQREEAENTLQSFR	Formyl@N-term; Deamidated(N)@13	missed R-E@8	0.0159597	2379.12	794.046	2379.1	794.041	3	21	2.1.1.623.22	0	26.8281	471.538	26.7868
4	135.98	136.58	93.56	86.48	84.98	sp|P08670|VIME_HUMAN	Vimentin OS=Homo sapiens GN=VIM PE=1 SV=4	2	99	LQEEMLQREEAENTLQSFRQDVDNASLAR	Formyl@N-term; Deamidated(N)@24	missed R-E@8; missed R-Q@19	0.0246397	3448.64	1150.55	3448.62	1150.55	3	18	3.1.1.764.31	0	30.7269	295.959	30.6085
4	135.98	136.58	93.56	86.48	84.98	sp|P08670|VIME_HUMAN	Vimentin OS=Homo sapiens GN=VIM PE=1 SV=4	2	99	LRSSVPGVR	Formyl@N-term	missed R-S@2	-0.0018291	997.565	499.79	997.567	499.791	2	13	2.1.1.409.7	0	13.6278	968.163	13.6728
4	135.98	136.58	93.56	86.48	84.98	sp|P08670|VIME_HUMAN	Vimentin OS=Homo sapiens GN=VIM PE=1 SV=4	2	99	MALDIEIATYR	iTRAQ8plex@N-term; Oxidation(M)@1		-0.0155715	1614.84	539.289	1614.86	539.294	3	17	5.1.1.1327.5	0	26.2853	750.087	26.272
4	135.98	136.58	93.56	86.48	84.98	sp|P08670|VIME_HUMAN	Vimentin OS=Homo sapiens GN=VIM PE=1 SV=4	2	99	MFGGPGTASRPSS	Formyl@N-term	cleaved S-S@C-term	0.00135161	1278.57	640.291	1278.57	640.29	2	14	4.1.1.1007.26	0	16.5121	1011.27	16.5255
4	135.98	136.58	93.56	86.48	84.98	sp|P08670|VIME_HUMAN	Vimentin OS=Homo sapiens GN=VIM PE=1 SV=4	2	99	MFGGPGTASRPSSSR	Formyl@N-term		0.00674033	1521.71	761.86	1521.7	761.857	2	19	3.1.1.477.31	0	13.0491	25318.2	12.9923
4	135.98	136.58	93.56	86.48	84.98	sp|P08670|VIME_HUMAN	Vimentin OS=Homo sapiens GN=VIM PE=1 SV=4	2	99	NLQEAEEWYK	Formyl@N-term; iTRAQ8plex(K)@10		0.000706616	1640.8	821.407	1640.8	821.407	2	16	19.1.1.954.21	0	24.8112	12750.1	24.7084
4	135.98	136.58	93.56	86.48	84.98	sp|P08670|VIME_HUMAN	Vimentin OS=Homo sapiens GN=VIM PE=1 SV=4	2	99	NLQEAEEWYKSK	iTRAQ8plex@N-term; iTRAQ8plex(K)@10; iTRAQ8plex(K)@12	missed K-S@10	0.00949002	2436.35	610.095	2436.34	610.093	4	13	3.1.1.612.18	1	21.3438	519.042	21.3088
4	135.98	136.58	93.56	86.48	84.98	sp|P08670|VIME_HUMAN	Vimentin OS=Homo sapiens GN=VIM PE=1 SV=4	2	99	NNDALR	iTRAQ8plex@N-term		-0.0058388	1005.55	503.78	1005.55	503.783	2	10	3.1.1.365.27	1	6.1402	466.686	6.152
4	135.98	136.58	93.56	86.48	84.98	sp|P08670|VIME_HUMAN	Vimentin OS=Homo sapiens GN=VIM PE=1 SV=4	2	99	QDSVDFSLADAINTEFKNTR	iTRAQ8plex@N-term; iTRAQ8plex(K)@17	cleaved L-Q@N-term; missed K-N@17	-0.993227	2877.5	720.382	2878.49	720.63	4	13	9.1.1.3595.3	0	58.1206	76.6264	58.1104
4	135.98	136.58	93.56	86.48	84.98	sp|P08670|VIME_HUMAN	Vimentin OS=Homo sapiens GN=VIM PE=1 SV=4	2	99	QDVDNASLAR	iTRAQ8plex@N-term		0.000321328	1391.73	696.873	1391.73	696.873	2	18	9.1.1.1409.28	1	10.7365	2213.94	10.6849
4	135.98	136.58	93.56	86.48	84.98	sp|P08670|VIME_HUMAN	Vimentin OS=Homo sapiens GN=VIM PE=1 SV=4	2	99	QMREMEENFAVEAANYQDTIGR	Formyl@N-term	missed R-E@3	0.0351965	2629.19	877.404	2629.15	877.392	3	19	3.1.1.750.24	0	29.8529	183.824	29.8696
4	135.98	136.58	93.56	86.48	84.98	sp|P08670|VIME_HUMAN	Vimentin OS=Homo sapiens GN=VIM PE=1 SV=4	2	99	QQYESVAAK	iTRAQ8plex@N-term; iTRAQ8plex(K)@9		-0.0122846	1630.9	816.458	1630.91	816.464	2	14	15.1.1.1580.29	1	19.6284	207.152	19.5749
4	135.98	136.58	93.56	86.48	84.98	sp|P08670|VIME_HUMAN	Vimentin OS=Homo sapiens GN=VIM PE=1 SV=4	2	99	QVQSLTCEVDALK	Formyl@N-term; Methylthio(C)@7; iTRAQ8plex(K)@13		-0.0056128	1810.91	906.46	1810.91	906.463	2	17	6.1.1.1327.24	0	34.2025	1129.95	34.281
4	135.98	136.58	93.56	86.48	84.98	sp|P08670|VIME_HUMAN	Vimentin OS=Homo sapiens GN=VIM PE=1 SV=4	2	99	QVQSLTCEVDALKGTNESLER	Formyl@N-term; Methylthio(C)@7; iTRAQ8plex(K)@13	missed K-G@13	-0.00467761	2697.32	900.114	2697.33	900.116	3	23	6.1.1.1314.25	0	33.4001	2338.84	33.4768
4	135.98	136.58	93.56	86.48	84.98	sp|P08670|VIME_HUMAN	Vimentin OS=Homo sapiens GN=VIM PE=1 SV=4	2	99	RDGQVINETSQHHDDLE	Formyl@N-term	cleaved T-R@N-term; missed R-D@1	0.0110471	2019.9	674.307	2019.89	674.303	3	16	7.1.1.1293.9	0	12.9251	168.786	12.8316
4	135.98	136.58	93.56	86.48	84.98	sp|P08670|VIME_HUMAN	Vimentin OS=Homo sapiens GN=VIM PE=1 SV=4	2	99	RMFGGPGTASR	Formyl@N-term	cleaved R-P@C-term; missed R-M@1	0.00465771	1163.56	582.785	1163.55	582.783	2	17	2.1.1.372.29	0	11.3796	248.908	11.3879
4	135.98	136.58	93.56	86.48	84.98	sp|P08670|VIME_HUMAN	Vimentin OS=Homo sapiens GN=VIM PE=1 SV=4	2	99	RMFGGPGTASRPSS	Formyl@N-term	cleaved S-S@C-term; missed R-M@1	0.00109386	1434.67	718.341	1434.67	718.341	2	21	2.1.1.380.31	0	11.8786	857.225	11.8837
4	135.98	136.58	93.56	86.48	84.98	sp|P08670|VIME_HUMAN	Vimentin OS=Homo sapiens GN=VIM PE=1 SV=4	2	99	RMFGGPGTASRPSSSR	Formyl@N-term	missed R-M@1	-0.00183788	1677.8	560.274	1677.8	560.274	3	22	2.1.1.346.16	0	9.7725	5183.51	9.7909
4	135.98	136.58	93.56	86.48	84.98	sp|P08670|VIME_HUMAN	Vimentin OS=Homo sapiens GN=VIM PE=1 SV=4	2	99	RSSVPGVRL	iTRAQ8plex@N-term	cleaved L-R@N-term; cleaved L-L@C-term; missed R-S@1; missed R-L@8	-0.0122494	1273.77	425.596	1273.78	425.6	3	14	4.1.1.997.6	0	15.8636	730.893	15.8483
4	135.98	136.58	93.56	86.48	84.98	sp|P08670|VIME_HUMAN	Vimentin OS=Homo sapiens GN=VIM PE=1 SV=4	2	99	RTYSLGSALRPSTSR	Formyl@N-term	cleaved T-R@N-term; missed R-T@1	0.00652999	1678.88	560.635	1678.88	560.632	3	18	8.1.1.1608.22	0	17.8496	3047.78	17.9316
4	135.98	136.58	93.56	86.48	84.98	sp|P08670|VIME_HUMAN	Vimentin OS=Homo sapiens GN=VIM PE=1 SV=4	2	99	SKFADLSEAANR	Formyl@N-term; iTRAQ8plex(K)@2	missed K-F@2	0.00813523	1639.86	547.626	1639.85	547.623	3	16	4.1.1.1047.10	0	18.9518	1213.23	18.9919
4	135.98	136.58	93.56	86.48	84.98	sp|P08670|VIME_HUMAN	Vimentin OS=Homo sapiens GN=VIM PE=1 SV=4	2	99	SLGSALRPSTSR	No iTRAQ8plex@N-term	cleaved Y-S@N-term	-0.000655171	1230.67	616.341	1230.67	616.341	2	12	2.1.1.345.22	0	9.7248	319.63	9.7298
4	135.98	136.58	93.56	86.48	84.98	sp|P08670|VIME_HUMAN	Vimentin OS=Homo sapiens GN=VIM PE=1 SV=4	2	99	SLYASSPGGVYAT	iTRAQ8plex@N-term	cleaved T-R@C-term	0.00252535	1575.81	788.913	1575.81	788.912	2	15	5.1.1.1228.30	0	20.2144	7584.49	20.2211
4	135.98	136.58	93.56	86.48	84.98	sp|P08670|VIME_HUMAN	Vimentin OS=Homo sapiens GN=VIM PE=1 SV=4	2	99	SLYASSPGGVYATR	No iTRAQ8plex@N-term		0.00349663	1427.71	714.861	1427.7	714.859	2	16	2.1.1.409.24	0	13.6678	1695.91	13.6118
4	135.98	136.58	93.56	86.48	84.98	sp|P08670|VIME_HUMAN	Vimentin OS=Homo sapiens GN=VIM PE=1 SV=4	2	99	SLYASSPGGVYATRS	iTRAQ8plex@N-term	cleaved S-S@C-term; missed R-S@14	0.0070832	1818.95	607.324	1818.94	607.321	3	17	5.1.1.1176.27	0	16.9964	584.548	16.9462
4	135.98	136.58	93.56	86.48	84.98	sp|P08670|VIME_HUMAN	Vimentin OS=Homo sapiens GN=VIM PE=1 SV=4	2	99	SSVPGVR	iTRAQ8plex@N-term		-0.00174025	1004.59	503.303	1004.59	503.303	2	11	17.1.1.645.23	1	10.4809	5091.69	10.3757
4	135.98	136.58	93.56	86.48	84.98	sp|P08670|VIME_HUMAN	Vimentin OS=Homo sapiens GN=VIM PE=1 SV=4	2	99	SVSSSSYR	iTRAQ8plex@N-term		0.000341573	1175.61	588.812	1175.61	588.812	2	14	11.1.1.1332.30	1	8.8344	594.821	8.7793
4	135.98	136.58	93.56	86.48	84.98	sp|P08670|VIME_HUMAN	Vimentin OS=Homo sapiens GN=VIM PE=1 SV=4	2	99	SYVTTSTR	iTRAQ8plex@N-term		0.000168417	1217.66	609.835	1217.66	609.835	2	13	17.1.1.619.28	1	8.8814	16059.4	8.8296
4	135.98	136.58	93.56	86.48	84.98	sp|P08670|VIME_HUMAN	Vimentin OS=Homo sapiens GN=VIM PE=1 SV=4	2	99	TNEKVELQELNDR	Formyl@N-term; iTRAQ8plex(K)@4; Deamidated(N)@11	missed K-V@4	-0.00899439	1919.97	640.996	1919.97	640.999	3	15	11.1.1.1603.23	0	25.5192	214.061	25.5993
4	135.98	136.58	93.56	86.48	84.98	sp|P08670|VIME_HUMAN	Vimentin OS=Homo sapiens GN=VIM PE=1 SV=4	2	99	TVETRDGQVINETSQHHDDLE	No iTRAQ8plex@N-term	missed R-D@5	0.0118509	2422.11	808.378	2422.1	808.374	3	20	8.1.1.1546.23	0	14.0498	623.648	14.0582
4	135.98	136.58	93.56	86.48	84.98	sp|P08670|VIME_HUMAN	Vimentin OS=Homo sapiens GN=VIM PE=1 SV=4	2	99	TYSLGSALRPSTSR	Formyl@N-term		0.00786009	1522.78	762.398	1522.77	762.394	2	15	7.1.1.1438.29	0	21.8538	31292.7	21.5559
4	135.98	136.58	93.56	86.48	84.98	sp|P08670|VIME_HUMAN	Vimentin OS=Homo sapiens GN=VIM PE=1 SV=4	2	99	VEVERDNLAEDIMR	Formyl@N-term; Oxidation(M)@13	missed R-D@5	0.00279471	1731.81	866.914	1731.81	866.912	2	16	10.1.1.1556.28	0	21.6153	1474.64	21.6867
4	135.98	136.58	93.56	86.48	84.98	sp|P08670|VIME_HUMAN	Vimentin OS=Homo sapiens GN=VIM PE=1 SV=4	2	99	YASSPGGVYATR	iTRAQ8plex@N-term	cleaved L-Y@N-term	-0.00218056	1531.79	766.903	1531.79	766.904	2	16	20.1.1.770.31	0	11.2006	593.136	11.2058
4	135.98	136.58	93.56	86.48	84.98	sp|P08670|VIME_HUMAN	Vimentin OS=Homo sapiens GN=VIM PE=1 SV=4	1.95861	99	SLYASSPGGVY	iTRAQ8plex@N-term	cleaved Y-A@C-term	-0.002017	1403.72	702.868	1403.72	702.869	2	14	5.1.1.1236.28	0	20.7026	1545.58	20.7127
4	135.98	136.58	93.56	86.48	84.98	sp|P08670|VIME_HUMAN	Vimentin OS=Homo sapiens GN=VIM PE=1 SV=4	1.25181	99	FANYIDKVR	Formyl@N-term; iTRAQ8plex(K)@7	missed K-V@7	-0.00264921	1456.8	486.606	1456.8	486.607	3	12	10.1.1.1641.7	0	26.8287	3948.94	26.8737
4	135.98	136.58	93.56	86.48	84.98	sp|P08670|VIME_HUMAN	Vimentin OS=Homo sapiens GN=VIM PE=1 SV=4	1.18709	99	ISLPLPNFSSLNLRET	iTRAQ8plex@N-term	cleaved T-N@C-term; missed R-E@14	-0.00245462	2104.18	702.401	2104.18	702.402	3	18	6.1.1.1457.4	0	42.218	206.116	42.2681
4	135.98	136.58	93.56	86.48	84.98	sp|P08670|VIME_HUMAN	Vimentin OS=Homo sapiens GN=VIM PE=1 SV=4	0.974694	99	RSSVPGVR	iTRAQ8plex@N-term	cleaved L-R@N-term; missed R-S@1	-0.00680627	1160.69	387.903	1160.69	387.905	3	11	17.1.1.924.4	0	27.797	537.143	27.7851
4	135.98	136.58	93.56	86.48	84.98	sp|P08670|VIME_HUMAN	Vimentin OS=Homo sapiens GN=VIM PE=1 SV=4	0.917215	99	ISLPLPNFS	iTRAQ8plex@N-term	cleaved S-S@C-term	-0.00674942	1290.74	646.378	1290.75	646.382	2	13	3.1.1.877.6	0	37.6572	1657.48	37.7659
4	135.98	136.58	93.56	86.48	84.98	sp|P08670|VIME_HUMAN	Vimentin OS=Homo sapiens GN=VIM PE=1 SV=4	0.899629	99	TYSLGSALRPST	iTRAQ8plex@N-term	cleaved T-S@C-term	0.00807896	1555.86	778.937	1555.85	778.933	2	13	9.1.1.1579.24	0	21.2164	290.216	21.167
4	135.98	136.58	93.56	86.48	84.98	sp|P08670|VIME_HUMAN	Vimentin OS=Homo sapiens GN=VIM PE=1 SV=4	0.790485	99	QDSVDFSLAD	iTRAQ8plex@N-term	cleaved L-Q@N-term; cleaved D-A@C-term	0.00672171	1399.68	700.849	1399.68	700.846	2	12	19.1.1.906.24	0	21.8345	320.421	21.7891
4	135.98	136.58	93.56	86.48	84.98	sp|P08670|VIME_HUMAN	Vimentin OS=Homo sapiens GN=VIM PE=1 SV=4	0.725842	99	HLREYQDLLNVK	Formyl@N-term; iTRAQ8plex(K)@12	missed R-E@3	0.00153231	1859.02	620.681	1859.02	620.681	3	12	10.1.1.1650.14	0	27.3968	474.36	27.3684
4	135.98	136.58	93.56	86.48	84.98	sp|P08670|VIME_HUMAN	Vimentin OS=Homo sapiens GN=VIM PE=1 SV=4	0.712198	99	RSLYASSPGGVYATR	iTRAQ8plex@N-term	cleaved S-R@N-term; missed R-S@1	-0.00918702	1888	630.341	1888.01	630.344	3	16	6.1.1.1032.30	0	16.0299	165.377	16.0366
4	135.98	136.58	93.56	86.48	84.98	sp|P08670|VIME_HUMAN	Vimentin OS=Homo sapiens GN=VIM PE=1 SV=4	0.675717	99	LGDLYEEEMRELRR	Formyl@N-term	missed R-E@10; missed R-R@13	0.00288218	1835.89	612.969	1835.88	612.969	3	15	3.1.1.779.6	0	31.6122	1665.2	31.7207
4	135.98	136.58	93.56	86.48	84.98	sp|P08670|VIME_HUMAN	Vimentin OS=Homo sapiens GN=VIM PE=1 SV=4	0.609065	99	SLYASSPGGVYA	iTRAQ8plex@N-term	cleaved A-T@C-term	0.00159338	1474.76	738.389	1474.76	738.388	2	12	5.1.1.1239.31	0	20.8915	10136.9	20.9581
4	135.98	136.58	93.56	86.48	84.98	sp|P08670|VIME_HUMAN	Vimentin OS=Homo sapiens GN=VIM PE=1 SV=4	0.395774	99	ILLAELEQLK	Formyl@N-term; iTRAQ8plex(K)@10		-0.000184684	1500.91	751.461	1500.91	751.461	2	16	16.1.1.1234.10	0	47.0882	11012.4	47.0658
4	135.98	136.58	93.56	86.48	84.98	sp|P08670|VIME_HUMAN	Vimentin OS=Homo sapiens GN=VIM PE=1 SV=4	0.329754	99	SKFADLSEAANRNNDALR	Formyl@N-term; iTRAQ8plex(K)@2; Deamidated(N)@13	missed K-F@2; missed R-N@12	-0.0121311	2324.15	775.725	2324.17	775.729	3	16	3.1.1.590.28	0	20.0069	342.359	19.8933
4	135.98	136.58	93.56	86.48	84.98	sp|P08670|VIME_HUMAN	Vimentin OS=Homo sapiens GN=VIM PE=1 SV=4	0.126098	99	QVDQLTNDK	Formyl@N-term; iTRAQ8plex(K)@9		0.00529993	1391.73	696.87	1391.72	696.867	2	12	11.1.1.1442.26	0	15.5791	440.791	15.5312
4	135.98	136.58	93.56	86.48	84.98	sp|P08670|VIME_HUMAN	Vimentin OS=Homo sapiens GN=VIM PE=1 SV=4	0.0127808	99	TVETRDGQVINETSQHHD	Formyl@N-term	cleaved D-D@C-term; missed R-D@5	0.0111511	2092.95	698.658	2092.94	698.654	3	16	8.1.1.1513.27	0	12.0248	243.447	11.9748
4	135.98	136.58	93.56	86.48	84.98	sp|P08670|VIME_HUMAN	Vimentin OS=Homo sapiens GN=VIM PE=1 SV=4	0.00568285	99	QDSVDFSLADAINTEFK	iTRAQ8plex@N-term; iTRAQ8plex(K)@17	cleaved L-Q@N-term	-4.03404	2503.27	835.429	2507.3	836.774	3	13	8.1.1.3730.12	0	57.8322	66.9629	57.8066
4	135.98	136.58	93.56	86.48	84.98	sp|P08670|VIME_HUMAN	Vimentin OS=Homo sapiens GN=VIM PE=1 SV=4	0.000434512	99	VESLQEEIAFLK	Arg-add@N-term; iTRAQ8plex(S)@3; iTRAQ8plex(K)@12		-0.017366	2169.24	724.089	2169.26	724.095	3	15	7.1.1.1694.12	0	37.6189	4695.05	37.5322
4	135.98	136.58	93.56	86.48	84.98	sp|P08670|VIME_HUMAN	Vimentin OS=Homo sapiens GN=VIM PE=1 SV=4	0.0213631	98.9	LLQDSVDFSLADAINTEFK	Formyl@N-term; iTRAQ8plex(K)@19		-0.0141534	2457.24	1229.63	2457.26	1229.64	2	13	16.1.1.1243.10	0	47.682	187.146	47.6258
4	135.98	136.58	93.56	86.48	84.98	sp|P08670|VIME_HUMAN	Vimentin OS=Homo sapiens GN=VIM PE=1 SV=4	0.0629839	98.87	ISLPLPNFSSLNLRETNLDSLPLVDTHSKR	Formyl@N-term; iTRAQ8plex(K)@29	missed R-E@14; missed K-R@29	-0.00340191	3708.01	928.01	3708.02	928.011	4	12	8.1.1.2109.4	0	48.709	232.242	48.744
4	135.98	136.58	93.56	86.48	84.98	sp|P08670|VIME_HUMAN	Vimentin OS=Homo sapiens GN=VIM PE=1 SV=4	1.85387	98.65	FLEQQNK	iTRAQ8plex@N-term; iTRAQ8plex(K)@7		-0.00799987	1513.86	505.628	1513.87	505.631	3	12	6.1.1.1052.20	0	17.2455	3423.25	17.2689
4	135.98	136.58	93.56	86.48	84.98	sp|P08670|VIME_HUMAN	Vimentin OS=Homo sapiens GN=VIM PE=1 SV=4	0.374688	98.5	SLGSALRPST	iTRAQ8plex@N-term	cleaved Y-S@N-term; cleaved T-S@C-term	-0.00520773	1291.74	646.875	1291.74	646.877	2	12	6.1.1.1054.31	0	17.3873	243.077	17.3923
4	135.98	136.58	93.56	86.48	84.98	sp|P08670|VIME_HUMAN	Vimentin OS=Homo sapiens GN=VIM PE=1 SV=4	0.356547	98.4	YASSPGGVYAT	iTRAQ8plex@N-term	cleaved L-Y@N-term; cleaved T-R@C-term	-0.00238704	1375.69	688.852	1375.69	688.854	2	12	19.1.1.754.31	0	12.3979	561.818	12.4031
4	135.98	136.58	93.56	86.48	84.98	sp|P08670|VIME_HUMAN	Vimentin OS=Homo sapiens GN=VIM PE=1 SV=4	0.0264104	97.46	DVRQQYESVAAK	Formyl@N-term; iTRAQ8plex(K)@12	missed R-Q@3	0.0170212	1724.92	575.98	1724.9	575.974	3	12	17.1.1.725.20	0	15.4421	175.139	15.4034
4	135.98	136.58	93.56	86.48	84.98	sp|P08670|VIME_HUMAN	Vimentin OS=Homo sapiens GN=VIM PE=1 SV=4	0.0840728	96.15	ETNLDSLPLVD	iTRAQ8plex@N-term	cleaved D-T@C-term	-0.0092089	1518.8	760.407	1518.81	760.411	2	12	2.1.1.664.16	0	29.3462	466.894	29.3762
4	135.98	136.58	93.56	86.48	84.98	sp|P08670|VIME_HUMAN	Vimentin OS=Homo sapiens GN=VIM PE=1 SV=4	0.0772745	95.93	ISLPLPNFSS	iTRAQ8plex@N-term	cleaved S-L@C-term	-0.000687894	1377.78	689.898	1377.78	689.898	2	10	3.1.1.864.10	0	36.86	112.243	36.7763
4	135.98	136.58	93.56	86.48	84.98	sp|P08670|VIME_HUMAN	Vimentin OS=Homo sapiens GN=VIM PE=1 SV=4	0.0118872	95.35	EKLQEEMLQR	Formyl@N-term; iTRAQ8plex(K)@2	missed K-L@2	-0.00893235	1634.85	545.958	1634.86	545.961	3	12	15.1.1.1696.11	0	26.7706	272.876	26.6241
5	129.88	129.88	98.93	96.27	92	sp|P60709|ACTB_HUMAN	Actin, cytoplasmic 1 OS=Homo sapiens GN=ACTB PE=1 SV=1	2	99	AGFAGDDAPR	No iTRAQ8plex@N-term		-0.00118242	975.44	488.727	975.441	488.728	2	12	4.1.1.865.21	0	7.7706	295.906	7.7305
5	129.88	129.88	98.93	96.27	92	sp|P60709|ACTB_HUMAN	Actin, cytoplasmic 1 OS=Homo sapiens GN=ACTB PE=1 SV=1	2	99	ANTVLSGGTTMYPGIADR	Formyl@N-term	cleaved Y-A@N-term	-0.0129003	1850.87	926.442	1850.88	926.449	2	18	8.1.1.1780.30	0	28.4701	203.169	28.4151
5	129.88	129.88	98.93	96.27	92	sp|P60709|ACTB_HUMAN	Actin, cytoplasmic 1 OS=Homo sapiens GN=ACTB PE=1 SV=1	2	99	AVFPSIVGR	iTRAQ8plex@N-term	cleaved R-P@C-term	-0.000176584	1248.75	625.382	1248.75	625.382	2	16	17.1.1.986.11	0	31.662	3986.07	31.3276
5	129.88	129.88	98.93	96.27	92	sp|P60709|ACTB_HUMAN	Actin, cytoplasmic 1 OS=Homo sapiens GN=ACTB PE=1 SV=1	2	99	AVFPSIVGRPR	No iTRAQ8plex@N-term		0.000330653	1197.7	400.24	1197.7	400.24	3	10	17.1.1.1263.2	0	48.8553	93.4893	48.8467
5	129.88	129.88	98.93	96.27	92	sp|P60709|ACTB_HUMAN	Actin, cytoplasmic 1 OS=Homo sapiens GN=ACTB PE=1 SV=1	2	99	CPEALFQPSFL	iTRAQ8plex@N-term; Methylthio(C)@1	cleaved L-G@C-term	-0.00460677	1600.79	801.402	1600.79	801.404	2	12	2.1.1.893.12	0	43.4833	1565.2	43.5819
5	129.88	129.88	98.93	96.27	92	sp|P60709|ACTB_HUMAN	Actin, cytoplasmic 1 OS=Homo sapiens GN=ACTB PE=1 SV=1	2	99	DDDIAALVVDNGSGMCK	Carbamyl@N-term; Methylthio(C)@16; iTRAQ8plex(K)@17	cleaved M-D@N-term	-0.0159612	2114.94	1058.48	2114.96	1058.49	2	12	2.1.1.794.27	0	37.388	19938.7	37.4615
5	129.88	129.88	98.93	96.27	92	sp|P60709|ACTB_HUMAN	Actin, cytoplasmic 1 OS=Homo sapiens GN=ACTB PE=1 SV=1	2	99	DLTDYLMK	iTRAQ8plex@N-term; iTRAQ8plex(K)@8		-0.00262348	1605.89	536.303	1605.89	536.304	3	13	9.1.1.1668.7	0	26.6665	22754.5	26.7732
5	129.88	129.88	98.93	96.27	92	sp|P60709|ACTB_HUMAN	Actin, cytoplasmic 1 OS=Homo sapiens GN=ACTB PE=1 SV=1	2	99	DLYANTVLSGGTTMYPGIADR	iTRAQ8plex@N-term; Deamidated(N)@5; Oxidation(M)@14		0.00551725	2535.25	846.091	2535.25	846.09	3	19	6.1.1.1207.29	0	26.8155	178.99	26.762
5	129.88	129.88	98.93	96.27	92	sp|P60709|ACTB_HUMAN	Actin, cytoplasmic 1 OS=Homo sapiens GN=ACTB PE=1 SV=1	2	99	DSYVGDEAQSK	Formyl@N-term; iTRAQ8plex(K)@11		-0.00343899	1529.71	765.863	1529.72	765.865	2	15	2.1.1.352.31	0	10.1538	571.629	10.0977
5	129.88	129.88	98.93	96.27	92	sp|P60709|ACTB_HUMAN	Actin, cytoplasmic 1 OS=Homo sapiens GN=ACTB PE=1 SV=1	2	99	DSYVGDEAQSKR	iTRAQ8plex@N-term; iTRAQ8plex(K)@11	missed K-R@11	-0.0041977	1962.02	982.019	1962.03	982.021	2	20	10.1.1.1371.14	0	10.2247	966.326	10.0466
5	129.88	129.88	98.93	96.27	92	sp|P60709|ACTB_HUMAN	Actin, cytoplasmic 1 OS=Homo sapiens GN=ACTB PE=1 SV=1	2	99	EITALAPSTMK	iTRAQ8plex@N-term; Oxidation(M)@10; iTRAQ8plex(K)@11		-0.0245016	1784.99	596.005	1785.02	596.013	3	12	7.1.1.1461.14	0	23.2487	372.381	23.282
5	129.88	129.88	98.93	96.27	92	sp|P60709|ACTB_HUMAN	Actin, cytoplasmic 1 OS=Homo sapiens GN=ACTB PE=1 SV=1	2	99	ESGPSIVHR	iTRAQ8plex@N-term	cleaved D-E@N-term	0.0048925	1284.71	429.245	1284.71	429.244	3	14	16.1.1.908.6	0	26.7814	239.221	26.8905
5	129.88	129.88	98.93	96.27	92	sp|P60709|ACTB_HUMAN	Actin, cytoplasmic 1 OS=Homo sapiens GN=ACTB PE=1 SV=1	2	99	EYDESGPSIVHR	Glu->pyro-Glu@N-term	cleaved Q-E@N-term	0.0100702	1369.64	685.825	1369.63	685.82	2	16	15.1.1.1543.14	0	17.3363	334.342	17.2393
5	129.88	129.88	98.93	96.27	92	sp|P60709|ACTB_HUMAN	Actin, cytoplasmic 1 OS=Homo sapiens GN=ACTB PE=1 SV=1	2	99	FRCPEALFQPSFL	iTRAQ8plex@N-term; Methylthio(C)@3	cleaved L-G@C-term; missed R-C@2	-0.00459165	1903.96	635.66	1903.96	635.662	3	11	9.1.1.1963.3	0	44.8882	539.799	44.8163
5	129.88	129.88	98.93	96.27	92	sp|P60709|ACTB_HUMAN	Actin, cytoplasmic 1 OS=Homo sapiens GN=ACTB PE=1 SV=1	2	99	GFAGDDAPR	iTRAQ8plex@N-term	cleaved A-G@N-term	-0.00116715	1208.61	605.311	1208.61	605.312	2	15	13.1.1.1488.25	0	16.6166	969.574	16.6316
5	129.88	129.88	98.93	96.27	92	sp|P60709|ACTB_HUMAN	Actin, cytoplasmic 1 OS=Homo sapiens GN=ACTB PE=1 SV=1	2	99	GGTTMYPGIADR	iTRAQ8plex@N-term	cleaved S-G@N-term	0.00446818	1541.79	514.936	1541.78	514.934	3	13	2.1.1.427.14	0	14.7415	1290.32	14.6522
5	129.88	129.88	98.93	96.27	92	sp|P60709|ACTB_HUMAN	Actin, cytoplasmic 1 OS=Homo sapiens GN=ACTB PE=1 SV=1	2	99	GILTLK	iTRAQ8plex@N-term; iTRAQ8plex(K)@6		-0.00567431	1251.83	626.923	1251.84	626.926	2	10	11.1.1.1819.9	0	38.8056	407.537	38.7856
5	129.88	129.88	98.93	96.27	92	sp|P60709|ACTB_HUMAN	Actin, cytoplasmic 1 OS=Homo sapiens GN=ACTB PE=1 SV=1	2	99	GILTLKY	iTRAQ8plex@N-term; iTRAQ8plex(K)@6	cleaved Y-P@C-term; missed K-Y@6	-0.00707033	1414.89	472.639	1414.9	472.641	3	10	17.1.1.1134.2	0	40.817	304.603	40.8705
5	129.88	129.88	98.93	96.27	92	sp|P60709|ACTB_HUMAN	Actin, cytoplasmic 1 OS=Homo sapiens GN=ACTB PE=1 SV=1	2	99	GMGQKDSYVGDEAQSK	Formyl@N-term; iTRAQ8plex(K)@5; iTRAQ8plex(K)@16	cleaved V-G@N-term; missed K-D@5	0.00964933	2335.17	779.396	2335.16	779.393	3	16	15.1.1.1597.28	0	20.6789	262.14	20.8129
5	129.88	129.88	98.93	96.27	92	sp|P60709|ACTB_HUMAN	Actin, cytoplasmic 1 OS=Homo sapiens GN=ACTB PE=1 SV=1	2	99	GYSFTTTAER	iTRAQ8plex@N-term		0.00272441	1435.73	479.583	1435.72	479.582	3	12	2.1.1.393.16	0	12.6557	6069.91	12.5007
5	129.88	129.88	98.93	96.27	92	sp|P60709|ACTB_HUMAN	Actin, cytoplasmic 1 OS=Homo sapiens GN=ACTB PE=1 SV=1	2	99	GYSFTTTAEREIVR	Formyl@N-term	missed R-E@10	0.00354212	1656.81	829.414	1656.81	829.413	2	19	2.1.1.569.27	0	23.5111	8447.17	23.5844
5	129.88	129.88	98.93	96.27	92	sp|P60709|ACTB_HUMAN	Actin, cytoplasmic 1 OS=Homo sapiens GN=ACTB PE=1 SV=1	2	99	HQGVMVGMGQ	iTRAQ8plex@N-term	cleaved Q-K@C-term	-0.00191304	1346.67	674.343	1346.67	674.344	2	14	5.1.1.1130.31	0	14.1715	259.891	14.1765
5	129.88	129.88	98.93	96.27	92	sp|P60709|ACTB_HUMAN	Actin, cytoplasmic 1 OS=Homo sapiens GN=ACTB PE=1 SV=1	2	99	HQGVMVGMGQK	iTRAQ8plex@N-term; Oxidation(M)@5; iTRAQ8plex(K)@11		-0.0012752	1794.97	599.33	1794.97	599.33	3	18	2.1.1.347.27	0	9.8404	1956.77	9.8521
5	129.88	129.88	98.93	96.27	92	sp|P60709|ACTB_HUMAN	Actin, cytoplasmic 1 OS=Homo sapiens GN=ACTB PE=1 SV=1	2	99	HQGVMVGMGQKDSYVGDEAQSK	Formyl@N-term; iTRAQ8plex(K)@11; iTRAQ8plex(K)@22	missed K-D@11	0.00840382	2986.48	598.304	2986.47	598.302	5	18	3.1.1.532.17	0	16.4104	4909.96	16.3776
5	129.88	129.88	98.93	96.27	92	sp|P60709|ACTB_HUMAN	Actin, cytoplasmic 1 OS=Homo sapiens GN=ACTB PE=1 SV=1	2	99	HQGVMVGMGQKDSYVGDEAQSKR	Formyl@N-term; iTRAQ8plex(K)@11; iTRAQ8plex(K)@22	missed K-D@11; missed K-R@22	0.0128202	3142.59	629.525	3142.57	629.522	5	22	3.1.1.535.23	0	16.6044	5028.18	16.4388
5	129.88	129.88	98.93	96.27	92	sp|P60709|ACTB_HUMAN	Actin, cytoplasmic 1 OS=Homo sapiens GN=ACTB PE=1 SV=1	2	99	IIAPPER	iTRAQ8plex@N-term		-0.00100018	1098.67	550.342	1098.67	550.342	2	8	21.1.1.1412.7	0	20.046	84.1382	20.0092
5	129.88	129.88	98.93	96.27	92	sp|P60709|ACTB_HUMAN	Actin, cytoplasmic 1 OS=Homo sapiens GN=ACTB PE=1 SV=1	2	99	IKIIAPPER	Formyl@N-term; iTRAQ8plex(K)@2	missed K-I@2	-0.00340292	1367.84	684.928	1367.84	684.929	2	12	12.1.1.906.20	0	29.0468	1865.83	29.3797
5	129.88	129.88	98.93	96.27	92	sp|P60709|ACTB_HUMAN	Actin, cytoplasmic 1 OS=Homo sapiens GN=ACTB PE=1 SV=1	2	99	IWHHTFYNELR	iTRAQ8plex@N-term		-0.00465346	1818.94	607.322	1818.95	607.323	3	14	2.1.1.659.10	0	29.028	1595.63	29.3762
5	129.88	129.88	98.93	96.27	92	sp|P60709|ACTB_HUMAN	Actin, cytoplasmic 1 OS=Homo sapiens GN=ACTB PE=1 SV=1	2	99	KDLYANTVLSGGTTMYPGIADR	iTRAQ8plex@N-term; iTRAQ8plex(K)@1; Oxidation(M)@15	missed K-D@1	0.0298486	2966.59	742.656	2966.56	742.648	4	16	10.1.1.1624.26	0	25.8108	412.999	25.7624
5	129.88	129.88	98.93	96.27	92	sp|P60709|ACTB_HUMAN	Actin, cytoplasmic 1 OS=Homo sapiens GN=ACTB PE=1 SV=1	2	99	LCYVALDFEQEMATAASSSSLEK	iTRAQ8plex@N-term; Methylthio(C)@2; iTRAQ8plex(K)@23		-4.9922	3141.55	1048.19	3146.54	1049.86	3	22	2.1.1.951.27	0	47.1121	408.592	47.0615
5	129.88	129.88	98.93	96.27	92	sp|P60709|ACTB_HUMAN	Actin, cytoplasmic 1 OS=Homo sapiens GN=ACTB PE=1 SV=1	2	99	LDLAGRDLTDYLMK	Formyl@N-term; iTRAQ8plex(K)@14	missed R-D@6	-0.00252216	1955.03	652.684	1955.03	652.685	3	13	17.1.1.2685.3	0	57.8715	1403.99	58.1096
5	129.88	129.88	98.93	96.27	92	sp|P60709|ACTB_HUMAN	Actin, cytoplasmic 1 OS=Homo sapiens GN=ACTB PE=1 SV=1	2	99	MQKEITALAPSTMK	Formyl@N-term; iTRAQ8plex(K)@3; iTRAQ8plex(K)@14	missed K-E@3	-0.00492658	2184.21	729.076	2184.21	729.078	3	18	8.1.1.1764.19	0	27.464	7081.49	27.5507
5	129.88	129.88	98.93	96.27	92	sp|P60709|ACTB_HUMAN	Actin, cytoplasmic 1 OS=Homo sapiens GN=ACTB PE=1 SV=1	2	99	MTQIMFETFN	iTRAQ8plex@N-term	cleaved N-T@C-term	-0.00809562	1564.75	783.382	1564.76	783.386	2	11	2.1.1.789.14	0	37.0575	555.994	37.0909
5	129.88	129.88	98.93	96.27	92	sp|P60709|ACTB_HUMAN	Actin, cytoplasmic 1 OS=Homo sapiens GN=ACTB PE=1 SV=1	2	99	QEYDESGPSIVHR	Formyl@N-term		0.00206789	1543.69	772.854	1543.69	772.852	2	16	10.1.1.1424.30	0	13.4852	2463.84	13.4919
5	129.88	129.88	98.93	96.27	92	sp|P60709|ACTB_HUMAN	Actin, cytoplasmic 1 OS=Homo sapiens GN=ACTB PE=1 SV=1	2	99	RGILTLK	Formyl@N-term; iTRAQ8plex(K)@7	missed R-G@1	-0.00130608	1131.73	566.871	1131.73	566.871	2	11	14.1.1.942.9	0	30.8989	2903.79	30.9408
5	129.88	129.88	98.93	96.27	92	sp|P60709|ACTB_HUMAN	Actin, cytoplasmic 1 OS=Homo sapiens GN=ACTB PE=1 SV=1	2	99	RLDLAGR	iTRAQ8plex@N-term	cleaved L-R@N-term; missed R-L@1	0.000680418	1103.67	368.898	1103.67	368.898	3	12	2.1.1.361.2	0	10.656	1183.01	10.6481
5	129.88	129.88	98.93	96.27	92	sp|P60709|ACTB_HUMAN	Actin, cytoplasmic 1 OS=Homo sapiens GN=ACTB PE=1 SV=1	2	99	RVAPEEHPVLLTEA	iTRAQ8plex@N-term	cleaved L-R@N-term; cleaved A-P@C-term; missed R-V@1	-0.00671311	1864.03	622.35	1864.04	622.353	3	12	20.1.1.1218.5	0	38.9829	689.415	39.0315
5	129.88	129.88	98.93	96.27	92	sp|P60709|ACTB_HUMAN	Actin, cytoplasmic 1 OS=Homo sapiens GN=ACTB PE=1 SV=1	2	99	RVAPEEHPVLLTEAPLNPK	Formyl@N-term; iTRAQ8plex(K)@19	cleaved L-R@N-term; missed R-V@1	-0.00334802	2441.36	611.346	2441.36	611.347	4	17	5.1.1.1327.8	0	26.2903	1800.31	26.2101
5	129.88	129.88	98.93	96.27	92	sp|P60709|ACTB_HUMAN	Actin, cytoplasmic 1 OS=Homo sapiens GN=ACTB PE=1 SV=1	2	99	SGGTTMYPGIADR	iTRAQ8plex@N-term	cleaved L-S@N-term	-0.00299585	1628.81	543.944	1628.81	543.945	3	17	2.1.1.421.19	0	14.3825	2173.28	14.3465
5	129.88	129.88	98.93	96.27	92	sp|P60709|ACTB_HUMAN	Actin, cytoplasmic 1 OS=Homo sapiens GN=ACTB PE=1 SV=1	2	99	SLYASGR	iTRAQ8plex@N-term	cleaved L-S@N-term	-0.00352358	1056.58	529.299	1056.59	529.301	2	12	20.1.1.729.28	0	8.6576	904.15	8.6679
5	129.88	129.88	98.93	96.27	92	sp|P60709|ACTB_HUMAN	Actin, cytoplasmic 1 OS=Homo sapiens GN=ACTB PE=1 SV=1	2	99	SVWIGGSIL	iTRAQ8plex@N-term	cleaved Y-S@N-term; cleaved L-A@C-term	-0.00135912	1234.72	618.368	1234.72	618.369	2	10	2.1.1.772.6	0	35.9937	411.943	35.9786
5	129.88	129.88	98.93	96.27	92	sp|P60709|ACTB_HUMAN	Actin, cytoplasmic 1 OS=Homo sapiens GN=ACTB PE=1 SV=1	2	99	SYELPDGQVITIGNER	No iTRAQ8plex@N-term; Deamidated(N)@14		0.00223442	1790.87	896.443	1790.87	896.442	2	19	2.1.1.613.23	0	26.2247	2611.22	26.1754
5	129.88	129.88	98.93	96.27	92	sp|P60709|ACTB_HUMAN	Actin, cytoplasmic 1 OS=Homo sapiens GN=ACTB PE=1 SV=1	2	99	SYELPDGQVITIGNERFR	Formyl@N-term; Deamidated(N)@14	missed R-F@16	0.00240299	2122.04	1062.03	2122.03	1062.02	2	17	8.1.1.1860.28	0	33.4026	865.313	33.4126
5	129.88	129.88	98.93	96.27	92	sp|P60709|ACTB_HUMAN	Actin, cytoplasmic 1 OS=Homo sapiens GN=ACTB PE=1 SV=1	2	99	TTGIVMDSGDGVTHTVPIYEGYALPH	iTRAQ8plex@N-term	cleaved H-A@C-term	0.0197866	3033.53	759.389	3033.51	759.384	4	15	9.1.1.1732.22	0	30.6456	471.111	30.6656
5	129.88	129.88	98.93	96.27	92	sp|P60709|ACTB_HUMAN	Actin, cytoplasmic 1 OS=Homo sapiens GN=ACTB PE=1 SV=1	2	99	TTGIVMDSGDGVTHTVPIYEGYALPHAILR	Formyl@N-term		0.00240191	3210.61	1071.21	3210.6	1071.21	3	12	2.1.1.750.18	0	34.6794	422.454	34.4397
5	129.88	129.88	98.93	96.27	92	sp|P60709|ACTB_HUMAN	Actin, cytoplasmic 1 OS=Homo sapiens GN=ACTB PE=1 SV=1	2	99	TVLSGGTTMYPGIADR	No iTRAQ8plex@N-term	cleaved N-T@N-term	-0.00332112	1637.81	819.91	1637.81	819.911	2	15	7.1.1.1453.30	0	22.781	161.345	22.726
5	129.88	129.88	98.93	96.27	92	sp|P60709|ACTB_HUMAN	Actin, cytoplasmic 1 OS=Homo sapiens GN=ACTB PE=1 SV=1	2	99	TVPIYEGYALPHAILR	Formyl@N-term	cleaved H-T@N-term	0.00196016	1839.99	921.002	1839.99	921.001	2	15	19.1.1.1227.25	0	41.8132	312.914	41.8284
5	129.88	129.88	98.93	96.27	92	sp|P60709|ACTB_HUMAN	Actin, cytoplasmic 1 OS=Homo sapiens GN=ACTB PE=1 SV=1	2	99	VAPEEHPVLLT	iTRAQ8plex@N-term	cleaved T-E@C-term	0.0120225	1507.87	754.941	1507.86	754.935	2	13	9.1.1.1609.29	0	23.0674	717.557	23.0758
5	129.88	129.88	98.93	96.27	92	sp|P60709|ACTB_HUMAN	Actin, cytoplasmic 1 OS=Homo sapiens GN=ACTB PE=1 SV=1	2	99	VAPEEHPVLLTEA	iTRAQ8plex@N-term	cleaved A-P@C-term	-0.00648527	1707.93	854.972	1707.94	854.975	2	15	20.1.1.1034.17	0	27.5788	984.14	27.4744
5	129.88	129.88	98.93	96.27	92	sp|P60709|ACTB_HUMAN	Actin, cytoplasmic 1 OS=Homo sapiens GN=ACTB PE=1 SV=1	2	99	VAPEEHPVLLTEAPLN	Formyl@N-term	cleaved N-P@C-term	-0.000545893	1755.9	878.959	1755.9	878.959	2	18	3.1.1.775.23	0	31.3932	12215.3	31.1644
5	129.88	129.88	98.93	96.27	92	sp|P60709|ACTB_HUMAN	Actin, cytoplasmic 1 OS=Homo sapiens GN=ACTB PE=1 SV=1	2	99	VAPEEHPVLLTEAPLNPK	No iTRAQ8plex@N-term; No iTRAQ8plex(K)@18		-0.000778247	1953.06	652.026	1953.06	652.026	3	21	3.1.1.631.17	0	22.5099	3070.55	22.5382
5	129.88	129.88	98.93	96.27	92	sp|P60709|ACTB_HUMAN	Actin, cytoplasmic 1 OS=Homo sapiens GN=ACTB PE=1 SV=1	2	99	VAPEEHPVLLTEAPLNPKANR	Formyl@N-term; iTRAQ8plex(K)@18	missed K-A@18	-0.0138746	2626.42	876.482	2626.44	876.487	3	21	6.1.1.1228.26	0	28.1047	871.773	28.118
5	129.88	129.88	98.93	96.27	92	sp|P60709|ACTB_HUMAN	Actin, cytoplasmic 1 OS=Homo sapiens GN=ACTB PE=1 SV=1	2	99	VFPSIVGRPR	iTRAQ8plex@N-term	cleaved A-V@N-term	-0.00191063	1430.86	477.962	1430.87	477.963	3	12	20.1.1.1212.2	0	38.6038	708.565	38.6573
5	129.88	129.88	98.93	96.27	92	sp|P60709|ACTB_HUMAN	Actin, cytoplasmic 1 OS=Homo sapiens GN=ACTB PE=1 SV=1	1.52288	99	YSVWIGGSIL	iTRAQ8plex@N-term	cleaved L-A@C-term	-0.00802415	1397.78	699.896	1397.79	699.9	2	9	5.1.1.1566.3	0	41.0115	232.998	41.0632
5	129.88	129.88	98.93	96.27	92	sp|P60709|ACTB_HUMAN	Actin, cytoplasmic 1 OS=Homo sapiens GN=ACTB PE=1 SV=1	1.35655	99	VAPEEHPVLLTE	iTRAQ8plex@N-term	cleaved E-A@C-term	-0.00330134	1636.89	546.639	1636.9	546.64	3	14	19.1.1.1011.6	0	28.3373	1084.99	28.3842
5	129.88	129.88	98.93	96.27	92	sp|P60709|ACTB_HUMAN	Actin, cytoplasmic 1 OS=Homo sapiens GN=ACTB PE=1 SV=1	1.26761	99	SYELPDGQVITI	iTRAQ8plex@N-term	cleaved I-G@C-term	-0.00676433	1637.88	819.945	1637.88	819.948	2	15	6.1.1.1368.17	0	36.7294	3403.99	36.7577
5	129.88	129.88	98.93	96.27	92	sp|P60709|ACTB_HUMAN	Actin, cytoplasmic 1 OS=Homo sapiens GN=ACTB PE=1 SV=1	1.12494	99	IKIIAPPERK	Formyl@N-term; iTRAQ8plex(K)@2; iTRAQ8plex(K)@10	missed K-I@2; missed R-K@9	-0.0106256	1800.13	601.052	1800.14	601.055	3	14	9.1.1.1599.18	0	22.432	680.105	22.3359
5	129.88	129.88	98.93	96.27	92	sp|P60709|ACTB_HUMAN	Actin, cytoplasmic 1 OS=Homo sapiens GN=ACTB PE=1 SV=1	1.10791	99	PSIVGRPR	No iTRAQ8plex@N-term	cleaved F-P@N-term	0.00183498	880.526	441.27	880.524	441.269	2	11	19.1.1.1298.2	0	46.2074	315.388	46.136
5	129.88	129.88	98.93	96.27	92	sp|P60709|ACTB_HUMAN	Actin, cytoplasmic 1 OS=Homo sapiens GN=ACTB PE=1 SV=1	0.982967	99	AGFAGDDA	iTRAQ8plex@N-term	cleaved A-P@C-term	-0.00344838	1026.49	514.252	1026.49	514.254	2	12	13.1.1.1431.23	0	13.0926	1182.38	13.111
5	129.88	129.88	98.93	96.27	92	sp|P60709|ACTB_HUMAN	Actin, cytoplasmic 1 OS=Homo sapiens GN=ACTB PE=1 SV=1	0.970616	99	MTQIMFETFNTPAMYV	iTRAQ8plex@N-term	cleaved V-A@C-term	-0.0076849	2227.06	1114.54	2227.07	1114.54	2	13	8.1.1.2075.31	0	46.7031	209.948	46.7082
5	129.88	129.88	98.93	96.27	92	sp|P60709|ACTB_HUMAN	Actin, cytoplasmic 1 OS=Homo sapiens GN=ACTB PE=1 SV=1	0.962573	99	TEAPLNPK	iTRAQ8plex@N-term; iTRAQ8plex(K)@8	cleaved L-T@N-term	-0.000959393	1476.88	493.299	1476.88	493.299	3	11	17.1.1.743.11	0	16.5436	187.905	16.5195
5	129.88	129.88	98.93	96.27	92	sp|P60709|ACTB_HUMAN	Actin, cytoplasmic 1 OS=Homo sapiens GN=ACTB PE=1 SV=1	0.946922	99	MTQIMFETF	iTRAQ8plex@N-term	cleaved F-N@C-term	-0.00163835	1450.71	726.364	1450.71	726.364	2	11	19.1.1.1226.12	0	41.7292	3334.46	41.7037
5	129.88	129.88	98.93	96.27	92	sp|P60709|ACTB_HUMAN	Actin, cytoplasmic 1 OS=Homo sapiens GN=ACTB PE=1 SV=1	0.88941	99	FAGDDAPR	iTRAQ8plex@N-term	cleaved G-F@N-term	0.00406046	1151.59	576.803	1151.59	576.801	2	11	16.1.1.695.13	0	13.5552	465.954	13.3998
5	129.88	129.88	98.93	96.27	92	sp|P60709|ACTB_HUMAN	Actin, cytoplasmic 1 OS=Homo sapiens GN=ACTB PE=1 SV=1	0.79588	99	CPEALFQPSFLGMESCGIHET	iTRAQ8plex@N-term; Methylthio(C)@1; Methylthio(C)@16	cleaved T-T@C-term	0.0208657	2691.2	898.075	2691.18	898.068	3	14	4.1.1.1462.22	0	44.5609	247.248	44.519
5	129.88	129.88	98.93	96.27	92	sp|P60709|ACTB_HUMAN	Actin, cytoplasmic 1 OS=Homo sapiens GN=ACTB PE=1 SV=1	0.701147	99	VAPEEHPVL	iTRAQ8plex@N-term	cleaved L-L@C-term	-0.00407403	1293.72	647.867	1293.72	647.869	2	11	17.1.1.865.16	0	24.1557	329.817	23.8743
5	129.88	129.88	98.93	96.27	92	sp|P60709|ACTB_HUMAN	Actin, cytoplasmic 1 OS=Homo sapiens GN=ACTB PE=1 SV=1	0.673664	99	LCYVALDFEQE	iTRAQ8plex@N-term; Methylthio(C)@2	cleaved E-M@C-term	0.0102469	1678.8	840.407	1678.79	840.402	2	10	2.1.1.903.18	0	44.1134	203.487	44.1401
5	129.88	129.88	98.93	96.27	92	sp|P60709|ACTB_HUMAN	Actin, cytoplasmic 1 OS=Homo sapiens GN=ACTB PE=1 SV=1	0.651695	99	VLSLYASGR	iTRAQ8plex@N-term	cleaved A-V@N-term	-0.00865813	1268.73	635.373	1268.74	635.377	2	14	2.1.1.573.16	0	23.7393	1661.94	23.7693
5	129.88	129.88	98.93	96.27	92	sp|P60709|ACTB_HUMAN	Actin, cytoplasmic 1 OS=Homo sapiens GN=ACTB PE=1 SV=1	0.600326	99	VAPEEHPVLLTEAPLNPKANREK	Formyl@N-term; iTRAQ8plex(K)@18; iTRAQ8plex(K)@23	missed K-A@18; missed R-E@21	0.00477311	3187.79	797.954	3187.78	797.953	4	15	5.1.1.1353.26	0	27.9141	411.325	27.9275
5	129.88	129.88	98.93	96.27	92	sp|P60709|ACTB_HUMAN	Actin, cytoplasmic 1 OS=Homo sapiens GN=ACTB PE=1 SV=1	0.207608	99	EHPVLLTEAPLNPK	Glu->pyro-Glu@N-term; iTRAQ8plex(K)@14	cleaved E-E@N-term	-0.0263693	1843.02	615.349	1843.05	615.358	3	14	8.1.1.1757.17	0	27.0306	363.986	27.059
5	129.88	129.88	98.93	96.27	92	sp|P60709|ACTB_HUMAN	Actin, cytoplasmic 1 OS=Homo sapiens GN=ACTB PE=1 SV=1	0.164944	99	IWHHTFYNEL	Formyl@N-term	cleaved L-R@C-term	0.000344368	1386.64	694.325	1386.64	694.325	2	12	20.1.1.1186.11	0	36.9981	2399.53	36.9118
5	129.88	129.88	98.93	96.27	92	sp|P60709|ACTB_HUMAN	Actin, cytoplasmic 1 OS=Homo sapiens GN=ACTB PE=1 SV=1	0.0486625	99	SLSTFQQMWISK	Formyl@N-term; iTRAQ8plex(K)@12	cleaved A-S@N-term	-0.00747982	1786.92	894.465	1786.92	894.469	2	15	3.1.1.848.19	0	35.8856	277.559	35.9106
5	129.88	129.88	98.93	96.27	92	sp|P60709|ACTB_HUMAN	Actin, cytoplasmic 1 OS=Homo sapiens GN=ACTB PE=1 SV=1	0.0404816	99	PIYEGYALPHAILR	Formyl@N-term	cleaved V-P@N-term	0.0061467	1639.88	820.947	1639.87	820.943	2	12	18.1.1.1183.20	0	40.8105	138.114	40.5844
5	129.88	129.88	98.93	96.27	92	sp|P60709|ACTB_HUMAN	Actin, cytoplasmic 1 OS=Homo sapiens GN=ACTB PE=1 SV=1	0.0296531	99	VAPEEHPVLL	Formyl@N-term	cleaved L-T@C-term	0.000937521	1130.6	566.306	1130.6	566.306	2	14	19.1.1.1022.9	0	29.0272	5574.43	29.1313
5	129.88	129.88	98.93	96.27	92	sp|P60709|ACTB_HUMAN	Actin, cytoplasmic 1 OS=Homo sapiens GN=ACTB PE=1 SV=1	0.00833099	99	FPSIVGRPR	Formyl@N-term	cleaved V-F@N-term	0.00278506	1055.59	528.803	1055.59	528.801	2	14	16.1.1.954.5	0	29.6422	2560.88	29.6908
5	129.88	129.88	98.93	96.27	92	sp|P60709|ACTB_HUMAN	Actin, cytoplasmic 1 OS=Homo sapiens GN=ACTB PE=1 SV=1	0.00392635	99	LSGGTTMYPGIADR	Formyl@N-term	cleaved V-L@N-term	0.0129497	1465.7	733.857	1465.69	733.851	2	15	6.1.1.1193.19	0	25.9367	387.197	25.9617
5	129.88	129.88	98.93	96.27	92	sp|P60709|ACTB_HUMAN	Actin, cytoplasmic 1 OS=Homo sapiens GN=ACTB PE=1 SV=1	0.00348833	99	YPIEHGIVTNWDDMEK	Delta:H(2)C(2)@N-term; Oxidation(P)@2; iTRAQ8plex(K)@16		-0.00247934	2292.1	765.041	2292.1	765.042	3	17	7.1.1.1608.12	0	32.3082	35297.7	32.0387
5	129.88	129.88	98.93	96.27	92	sp|P60709|ACTB_HUMAN	Actin, cytoplasmic 1 OS=Homo sapiens GN=ACTB PE=1 SV=1	0.00174066	99	RHQGVMVGMGQK	Carbamyl@N-term; Deamidated(Q)@3; iTRAQ8plex(K)@12	cleaved P-R@N-term; missed R-H@1	0.0157142	1674.88	559.299	1674.86	559.294	3	14	5.1.1.1171.26	0	16.6858	138.655	16.6992
5	129.88	129.88	98.93	96.27	92	sp|P60709|ACTB_HUMAN	Actin, cytoplasmic 1 OS=Homo sapiens GN=ACTB PE=1 SV=1	0.249492	98.96	ATAASSSSLEK	No iTRAQ8plex@N-term; iTRAQ8plex(K)@11	cleaved M-A@N-term	-0.00754186	1354.72	678.366	1354.72	678.37	2	12	20.1.1.717.10	0	7.9238	0	-1
5	129.88	129.88	98.93	96.27	92	sp|P60709|ACTB_HUMAN	Actin, cytoplasmic 1 OS=Homo sapiens GN=ACTB PE=1 SV=1	0.183096	98.89	QAVLSLYASGR	Gln->pyro-Glu@N-term	cleaved I-Q@N-term	-0.012708	1146.59	574.303	1146.6	574.309	2	11	11.1.1.1659.20	0	28.9689	227.475	28.8687
5	129.88	129.88	98.93	96.27	92	sp|P60709|ACTB_HUMAN	Actin, cytoplasmic 1 OS=Homo sapiens GN=ACTB PE=1 SV=1	0.000869459	98.79	EHGIVTNWDDMEK	iTRAQ8plex@N-term; Cation:Na(E)@1; iTRAQ8plex(K)@13	cleaved I-E@N-term	-0.0163366	2203.06	735.362	2203.08	735.367	3	14	3.1.1.740.12	0	29.2186	493.298	29.2553
5	129.88	129.88	98.93	96.27	92	sp|P60709|ACTB_HUMAN	Actin, cytoplasmic 1 OS=Homo sapiens GN=ACTB PE=1 SV=1	0.00305075	98.76	VLSGGTTMYPGIADR	Formyl@N-term	cleaved T-V@N-term	0.000703414	1564.76	783.385	1564.76	783.385	2	12	9.1.1.1705.27	0	28.9862	308.15	28.9979
5	129.88	129.88	98.93	96.27	92	sp|P60709|ACTB_HUMAN	Actin, cytoplasmic 1 OS=Homo sapiens GN=ACTB PE=1 SV=1	0.239578	98.62	FRCPEALFQPSFLGMES	iTRAQ8plex@N-term; Methylthio(C)@3	cleaved S-C@C-term; missed R-C@2	-0.0145338	2308.09	770.369	2308.1	770.374	3	11	8.1.1.2036.13	0	44.2619	221.212	44.235
5	129.88	129.88	98.93	96.27	92	sp|P60709|ACTB_HUMAN	Actin, cytoplasmic 1 OS=Homo sapiens GN=ACTB PE=1 SV=1	0.657577	98.52	RVAPEEHPVLL	iTRAQ8plex@N-term	cleaved L-R@N-term; cleaved L-T@C-term; missed R-V@1	-0.000373786	1562.91	521.977	1562.91	521.977	3	13	2.1.1.512.6	0	19.9689	3533.36	20.1377
5	129.88	129.88	98.93	96.27	92	sp|P60709|ACTB_HUMAN	Actin, cytoplasmic 1 OS=Homo sapiens GN=ACTB PE=1 SV=1	0.600326	98.37	SLSTFQQMWI	iTRAQ8plex@N-term	cleaved A-S@N-term; cleaved I-S@C-term	0.000923857	1543.8	772.908	1543.8	772.908	2	12	4.1.1.1375.15	0	39.1904	447.485	39.2221
5	129.88	129.88	98.93	96.27	92	sp|P60709|ACTB_HUMAN	Actin, cytoplasmic 1 OS=Homo sapiens GN=ACTB PE=1 SV=1	0.367543	98.23	MTQIMFETFNT	iTRAQ8plex@N-term	cleaved T-P@C-term	-0.00250564	1665.8	833.909	1665.8	833.91	2	11	3.1.1.879.18	0	37.801	351.275	37.7659
5	129.88	129.88	98.93	96.27	92	sp|P60709|ACTB_HUMAN	Actin, cytoplasmic 1 OS=Homo sapiens GN=ACTB PE=1 SV=1	0.0472076	98.23	DDDIAALVVDNGSGMCKAGFAGDDAPR	Carbamyl@N-term; Methylthio(C)@16; iTRAQ8plex(K)@17	cleaved M-D@N-term; missed K-A@17	-0.0237101	3072.37	1025.13	3072.39	1025.14	3	13	6.1.1.1393.26	0	38.2922	1235.03	38.3674
5	129.88	129.88	98.93	96.27	92	sp|P60709|ACTB_HUMAN	Actin, cytoplasmic 1 OS=Homo sapiens GN=ACTB PE=1 SV=1	0.573489	98.06	MQKEITAL	iTRAQ8plex@N-term; iTRAQ8plex(K)@3	cleaved L-A@C-term; missed K-E@3	-0.0116375	1540.9	514.64	1540.91	514.644	3	11	3.1.1.612.10	0	21.3305	1650.89	21.3706
5	129.88	129.88	98.93	96.27	92	sp|P60709|ACTB_HUMAN	Actin, cytoplasmic 1 OS=Homo sapiens GN=ACTB PE=1 SV=1	0.201349	97.96	APEEHPVLL	iTRAQ8plex@N-term	cleaved V-A@N-term; cleaved L-T@C-term	-0.00605418	1307.73	654.874	1307.74	654.877	2	11	19.1.1.1044.11	0	30.3994	539.815	30.6248
5	129.88	129.88	98.93	96.27	92	sp|P60709|ACTB_HUMAN	Actin, cytoplasmic 1 OS=Homo sapiens GN=ACTB PE=1 SV=1	0.246417	97.72	CPEALFQPSFLGMES	iTRAQ8plex@N-term; Methylthio(C)@1	cleaved S-C@C-term	0.00876581	2004.94	1003.48	2004.93	1003.47	2	11	3.1.1.967.25	0	43.234	614.074	43.249
5	129.88	129.88	98.93	96.27	92	sp|P60709|ACTB_HUMAN	Actin, cytoplasmic 1 OS=Homo sapiens GN=ACTB PE=1 SV=1	0.294136	97.35	GMESCGIHET	iTRAQ8plex@N-term; Methylthio(C)@5	cleaved L-G@N-term; cleaved T-T@C-term	0.00513567	1412.61	707.312	1412.6	707.309	2	13	3.1.1.516.28	0	15.4442	493.054	15.3926
5	129.88	129.88	98.93	96.27	92	sp|P60709|ACTB_HUMAN	Actin, cytoplasmic 1 OS=Homo sapiens GN=ACTB PE=1 SV=1	0.171985	97.14	AVFPSIVG	iTRAQ8plex@N-term	cleaved G-R@C-term	-0.00351476	1092.65	547.33	1092.65	547.332	2	10	17.1.1.979.9	0	31.2236	1338.11	31.1411
5	129.88	129.88	98.93	96.27	92	sp|P60709|ACTB_HUMAN	Actin, cytoplasmic 1 OS=Homo sapiens GN=ACTB PE=1 SV=1	0.000434512	97.09	ALDFEQEMATAASSSSLEK	Formyl@N-term; iTRAQ8plex(K)@19	cleaved V-A@N-term	-0.00061884	2346.12	783.047	2346.12	783.047	3	14	4.1.1.1287.16	0	33.7513	349.966	33.7195
5	129.88	129.88	98.93	96.27	92	sp|P60709|ACTB_HUMAN	Actin, cytoplasmic 1 OS=Homo sapiens GN=ACTB PE=1 SV=1	0.000869459	96.94	DSGDGVTHTVPIYEGYALPHAILR	Formyl@N-term	cleaved M-D@N-term	0.00711081	2608.3	870.44	2608.29	870.438	3	13	16.1.1.1178.20	0	43.6065	329.075	43.5051
5	129.88	129.88	98.93	96.27	92	sp|P60709|ACTB_HUMAN	Actin, cytoplasmic 1 OS=Homo sapiens GN=ACTB PE=1 SV=1	0.00348833	96.57	ELPDGQVITIGNER	iTRAQ8plex@N-term	cleaved Y-E@N-term	-3.01155	1840.98	921.499	1843.99	923.005	2	13	5.1.1.1422.25	0	32.1544	318.808	32.1694
5	129.88	129.88	98.93	96.27	92	sp|P60709|ACTB_HUMAN	Actin, cytoplasmic 1 OS=Homo sapiens GN=ACTB PE=1 SV=1	0.00877392	96.2	CPEALFQPSFLGMESCGIH	iTRAQ8plex@N-term; Methylthio(C)@1; Methylthio(C)@16	cleaved H-E@C-term	0.068053	2461.16	821.394	2461.09	821.371	3	12	6.1.1.1518.10	0	46.0035	53.8905	45.9199
6	129.53	129.54	68.95	49.71	39.39	sp|Q09666|AHNK_HUMAN	Neuroblast differentiation-associated protein AHNAK OS=Homo sapiens GN=AHNAK PE=1 SV=2	2	99	ADIDISGPNVDVDVPDVNIEGPDAK	iTRAQ8plex@N-term; iTRAQ8plex(K)@25		-0.0240179	3171.62	1058.21	3171.64	1058.22	3	19	2.1.1.679.30	1	30.2969	0	-1
6	129.53	129.54	68.95	49.71	39.39	sp|Q09666|AHNK_HUMAN	Neuroblast differentiation-associated protein AHNAK OS=Homo sapiens GN=AHNAK PE=1 SV=2	2	99	ADIDVSGPK	iTRAQ8plex@N-term; iTRAQ8plex(K)@9		-0.00904821	1508.86	755.436	1508.87	755.44	2	14	17.1.1.758.27	1	17.506	633.142	18.0796
6	129.53	129.54	68.95	49.71	39.39	sp|Q09666|AHNK_HUMAN	Neuroblast differentiation-associated protein AHNAK OS=Homo sapiens GN=AHNAK PE=1 SV=2	2	99	ADVDISGPK	iTRAQ8plex@N-term; No iTRAQ8plex(K)@9		-0.00075588	1204.66	603.337	1204.66	603.338	2	13	16.1.1.732.13	0	15.8297	307.235	15.555
6	129.53	129.54	68.95	49.71	39.39	sp|Q09666|AHNK_HUMAN	Neuroblast differentiation-associated protein AHNAK OS=Homo sapiens GN=AHNAK PE=1 SV=2	2	99	AEGPEVDVNLPK	Formyl@N-term; iTRAQ8plex(K)@12		-0.00245814	1598.84	800.429	1598.85	800.43	2	16	17.1.1.851.25	0	23.2981	2144.75	23.3134
6	129.53	129.54	68.95	49.71	39.39	sp|Q09666|AHNK_HUMAN	Neuroblast differentiation-associated protein AHNAK OS=Homo sapiens GN=AHNAK PE=1 SV=2	2	99	AGAISASGPELQGAGHSK	iTRAQ8plex@N-term; iTRAQ8plex(K)@18		0.00338519	2245.23	562.315	2245.23	562.314	4	17	2.1.1.417.18	1	14.1359	993.993	14.0399
6	129.53	129.54	68.95	49.71	39.39	sp|Q09666|AHNK_HUMAN	Neuroblast differentiation-associated protein AHNAK OS=Homo sapiens GN=AHNAK PE=1 SV=2	2	99	DDGVFVQEVTQNSPAAR	Formyl@N-term; Deamidated(N)@12		0.0133629	1860.86	931.438	1860.85	931.432	2	17	13.1.1.1630.30	0	25.3903	212.709	25.397
6	129.53	129.54	68.95	49.71	39.39	sp|Q09666|AHNK_HUMAN	Neuroblast differentiation-associated protein AHNAK OS=Homo sapiens GN=AHNAK PE=1 SV=2	2	99	ELLLPNWQGSGSHGLTIAQR	Formyl@N-term		-0.00215057	2204.13	735.718	2204.13	735.719	3	15	19.1.1.1205.14	0	40.4234	832.358	41.0177
6	129.53	129.54	68.95	49.71	39.39	sp|Q09666|AHNK_HUMAN	Neuroblast differentiation-associated protein AHNAK OS=Homo sapiens GN=AHNAK PE=1 SV=2	2	99	EMGVDVHFPK	iTRAQ8plex@N-term; iTRAQ8plex(K)@10		-0.0132925	1765.95	589.658	1765.96	589.662	3	11	5.1.1.1277.11	0	23.2045	792.312	23.119
6	129.53	129.54	68.95	49.71	39.39	sp|Q09666|AHNK_HUMAN	Neuroblast differentiation-associated protein AHNAK OS=Homo sapiens GN=AHNAK PE=1 SV=2	2	99	FSMPGFK	iTRAQ8plex@N-term; iTRAQ8plex(K)@7		-0.00765636	1420.79	474.605	1420.8	474.607	3	9	18.1.1.1130.3	1	37.4776	151.349	37.5295
6	129.53	129.54	68.95	49.71	39.39	sp|Q09666|AHNK_HUMAN	Neuroblast differentiation-associated protein AHNAK OS=Homo sapiens GN=AHNAK PE=1 SV=2	2	99	GGQIGLQAPGLSVSGPQGHLESGSGK	Formyl@N-term; iTRAQ8plex(K)@26		0.0298049	2749.46	917.494	2749.43	917.484	3	18	8.1.1.1740.30	0	26.001	373.43	25.9459
6	129.53	129.54	68.95	49.71	39.39	sp|Q09666|AHNK_HUMAN	Neuroblast differentiation-associated protein AHNAK OS=Homo sapiens GN=AHNAK PE=1 SV=2	2	99	GGVQVPAVDISSSLGGR	Formyl@N-term		0.00292099	1625.84	813.927	1625.84	813.926	2	18	9.1.1.1724.24	0	30.1545	1970.37	30.1095
6	129.53	129.54	68.95	49.71	39.39	sp|Q09666|AHNK_HUMAN	Neuroblast differentiation-associated protein AHNAK OS=Homo sapiens GN=AHNAK PE=1 SV=2	2	99	GLDLGGR	iTRAQ8plex@N-term		-0.00325448	990.573	496.294	990.576	496.296	2	12	2.1.1.393.17	1	12.6573	3674.18	12.6241
6	129.53	129.54	68.95	49.71	39.39	sp|Q09666|AHNK_HUMAN	Neuroblast differentiation-associated protein AHNAK OS=Homo sapiens GN=AHNAK PE=1 SV=2	2	99	GPEVDLKGPR	Formyl@N-term; iTRAQ8plex(K)@7	missed K-G@7	-0.00760157	1398.77	700.392	1398.78	700.396	2	13	16.1.1.764.22	0	17.8381	588.104	17.9207
6	129.53	129.54	68.95	49.71	39.39	sp|Q09666|AHNK_HUMAN	Neuroblast differentiation-associated protein AHNAK OS=Homo sapiens GN=AHNAK PE=1 SV=2	2	99	IEGEMQVPDVDIR	iTRAQ8plex@N-term		-0.0106952	1803.92	902.969	1803.93	902.974	2	18	2.1.1.617.26	1	26.4671	248.196	26.4805
6	129.53	129.54	68.95	49.71	39.39	sp|Q09666|AHNK_HUMAN	Neuroblast differentiation-associated protein AHNAK OS=Homo sapiens GN=AHNAK PE=1 SV=2	2	99	IKGDVPSVGLEGPDVDLQGPEAK	Formyl@N-term; iTRAQ8plex(K)@2; iTRAQ8plex(K)@23	missed K-G@2	0.000401069	2955.6	739.908	2955.6	739.908	4	17	4.1.1.1216.17	0	29.3734	520.106	29.3401
6	129.53	129.54	68.95	49.71	39.39	sp|Q09666|AHNK_HUMAN	Neuroblast differentiation-associated protein AHNAK OS=Homo sapiens GN=AHNAK PE=1 SV=2	2	99	ISAPNVDFNLEGPK	iTRAQ8plex@N-term; iTRAQ8plex(K)@14		-0.00900219	2108.16	703.729	2108.17	703.732	3	13	8.1.1.1777.15	1	28.2598	746.37	28.3533
6	129.53	129.54	68.95	49.71	39.39	sp|Q09666|AHNK_HUMAN	Neuroblast differentiation-associated protein AHNAK OS=Homo sapiens GN=AHNAK PE=1 SV=2	2	99	ISIPDVGL	iTRAQ8plex@N-term	cleaved L-H@C-term	-0.00316526	1116.67	559.341	1116.67	559.342	2	10	11.1.1.1799.6	0	37.5656	95.5002	37.4887
6	129.53	129.54	68.95	49.71	39.39	sp|Q09666|AHNK_HUMAN	Neuroblast differentiation-associated protein AHNAK OS=Homo sapiens GN=AHNAK PE=1 SV=2	2	99	ISMPDVDLHMK	iTRAQ8plex@N-term; Oxidation(M)@10; iTRAQ8plex(K)@11		-0.00102527	1909.03	955.52	1909.03	955.52	2	13	10.1.1.1735.28	0	32.6655	1940.28	32.7374
6	129.53	129.54	68.95	49.71	39.39	sp|Q09666|AHNK_HUMAN	Neuroblast differentiation-associated protein AHNAK OS=Homo sapiens GN=AHNAK PE=1 SV=2	2	99	ISMPDVDLHVK	iTRAQ8plex@N-term; iTRAQ8plex(K)@11		-0.000149506	1861.06	621.36	1861.06	621.36	3	15	8.1.1.1763.11	1	27.3889	368.254	27.3658
6	129.53	129.54	68.95	49.71	39.39	sp|Q09666|AHNK_HUMAN	Neuroblast differentiation-associated protein AHNAK OS=Homo sapiens GN=AHNAK PE=1 SV=2	2	99	ISMQDVDLSLGSPK	Formyl@N-term; iTRAQ8plex(K)@14		-0.00921015	1820.94	911.477	1820.95	911.482	2	18	9.1.1.1786.27	0	33.9851	1268.6	33.9968
6	129.53	129.54	68.95	49.71	39.39	sp|Q09666|AHNK_HUMAN	Neuroblast differentiation-associated protein AHNAK OS=Homo sapiens GN=AHNAK PE=1 SV=2	2	99	ISMSEVDLNVAAPK	Formyl@N-term; iTRAQ8plex(K)@14		-0.0126436	1804.94	903.478	1804.95	903.485	2	18	7.1.1.1620.27	0	33.0754	590.832	33.0253
6	129.53	129.54	68.95	49.71	39.39	sp|Q09666|AHNK_HUMAN	Neuroblast differentiation-associated protein AHNAK OS=Homo sapiens GN=AHNAK PE=1 SV=2	2	99	LEGDLTGPSVDVEVPDVELECPDAK	iTRAQ8plex@N-term; Methylthio(C)@21; iTRAQ8plex(K)@25		-0.00218819	3279.63	820.915	3279.64	820.916	4	14	4.1.1.1350.17	1	37.6475	111.56	37.614
6	129.53	129.54	68.95	49.71	39.39	sp|Q09666|AHNK_HUMAN	Neuroblast differentiation-associated protein AHNAK OS=Homo sapiens GN=AHNAK PE=1 SV=2	2	99	LEGDLTGPSVGVEVPDVELECPDAK	Formyl@N-term; Methylthio(C)@21; iTRAQ8plex(K)@25		0.0247698	2945.44	982.822	2945.42	982.814	3	11	5.1.1.1566.19	0	41.0382	491.561	41.0019
6	129.53	129.54	68.95	49.71	39.39	sp|Q09666|AHNK_HUMAN	Neuroblast differentiation-associated protein AHNAK OS=Homo sapiens GN=AHNAK PE=1 SV=2	2	99	LEVPDMNIR	iTRAQ8plex@N-term		0.00621889	1389.77	464.262	1389.76	464.26	3	12	6.1.1.1204.5	1	26.5903	133.368	26.577
6	129.53	129.54	68.95	49.71	39.39	sp|Q09666|AHNK_HUMAN	Neuroblast differentiation-associated protein AHNAK OS=Homo sapiens GN=AHNAK PE=1 SV=2	2	99	LKGEIDASVPELEGDLR	Formyl@N-term; iTRAQ8plex(K)@2	missed K-G@2	0.0156377	2172.17	725.065	2172.16	725.06	3	19	2.1.1.706.15	0	31.9406	382.263	31.9107
6	129.53	129.54	68.95	49.71	39.39	sp|Q09666|AHNK_HUMAN	Neuroblast differentiation-associated protein AHNAK OS=Homo sapiens GN=AHNAK PE=1 SV=2	2	99	LKSEDGVEGDLGETQSR	Formyl@N-term; iTRAQ8plex(K)@2	missed K-S@2	0.00655017	2151.07	718.029	2151.06	718.027	3	15	11.1.1.1556.19	0	22.6094	352.848	22.6963
6	129.53	129.54	68.95	49.71	39.39	sp|Q09666|AHNK_HUMAN	Neuroblast differentiation-associated protein AHNAK OS=Homo sapiens GN=AHNAK PE=1 SV=2	2	99	LNVGAPDVTLR	iTRAQ8plex@N-term		-0.00648667	1457.84	729.929	1457.85	729.933	2	17	7.1.1.1492.25	1	25.1771	826.864	25.1304
6	129.53	129.54	68.95	49.71	39.39	sp|Q09666|AHNK_HUMAN	Neuroblast differentiation-associated protein AHNAK OS=Homo sapiens GN=AHNAK PE=1 SV=2	2	99	LPSGSGAASPTGSAVDIR	iTRAQ8plex@N-term		0.00476684	1946.04	649.688	1946.04	649.686	3	15	3.1.1.548.24	1	17.4058	2012.74	17.3607
6	129.53	129.54	68.95	49.71	39.39	sp|Q09666|AHNK_HUMAN	Neuroblast differentiation-associated protein AHNAK OS=Homo sapiens GN=AHNAK PE=1 SV=2	2	99	LPTGQISGPEIK	iTRAQ8plex@N-term; iTRAQ8plex(K)@12		-0.00525432	1847.09	616.705	1847.1	616.707	3	15	6.1.1.1158.17	1	23.7692	479.747	23.7976
6	129.53	129.54	68.95	49.71	39.39	sp|Q09666|AHNK_HUMAN	Neuroblast differentiation-associated protein AHNAK OS=Homo sapiens GN=AHNAK PE=1 SV=2	2	99	LQVTMPGIK	Formyl@N-term; iTRAQ8plex(K)@9		0.00112549	1317.76	659.889	1317.76	659.889	2	11	14.1.1.939.21	0	30.7323	1371.12	30.8785
6	129.53	129.54	68.95	49.71	39.39	sp|Q09666|AHNK_HUMAN	Neuroblast differentiation-associated protein AHNAK OS=Homo sapiens GN=AHNAK PE=1 SV=2	2	99	MDAEVPDVNIEGPDAK	iTRAQ8plex@N-term; iTRAQ8plex(K)@16		0.00346848	2307.19	770.071	2307.19	770.07	3	13	18.1.1.1021.18	1	30.7143	134.368	30.7411
6	129.53	129.54	68.95	49.71	39.39	sp|Q09666|AHNK_HUMAN	Neuroblast differentiation-associated protein AHNAK OS=Homo sapiens GN=AHNAK PE=1 SV=2	2	99	MDVNVGDIDIEGPEGK	Formyl@N-term; iTRAQ8plex(K)@16		0.00621159	2018.98	1010.5	2018.98	1010.5	2	16	19.1.1.1037.30	0	29.9948	544.078	30.0017
6	129.53	129.54	68.95	49.71	39.39	sp|Q09666|AHNK_HUMAN	Neuroblast differentiation-associated protein AHNAK OS=Homo sapiens GN=AHNAK PE=1 SV=2	2	99	MEGGGAEVHAQLPSLEGDLR	Formyl@N-term		-0.00692242	2092.98	1047.5	2092.98	1047.5	2	17	3.1.1.703.31	0	26.9734	208.218	26.9167
6	129.53	129.54	68.95	49.71	39.39	sp|Q09666|AHNK_HUMAN	Neuroblast differentiation-associated protein AHNAK OS=Homo sapiens GN=AHNAK PE=1 SV=2	2	99	MPSLEISAPK	iTRAQ8plex@N-term; iTRAQ8plex(K)@10		-0.00232233	1679.97	560.998	1679.97	560.999	3	13	8.1.1.1733.9	1	25.5335	703.735	25.5134
6	129.53	129.54	68.95	49.71	39.39	sp|Q09666|AHNK_HUMAN	Neuroblast differentiation-associated protein AHNAK OS=Homo sapiens GN=AHNAK PE=1 SV=2	2	99	RVTAYTVDVTGR	Formyl@N-term	missed R-V@1	0.00270381	1364.71	683.361	1364.7	683.36	2	20	2.1.1.457.26	0	16.6148	3964.8	16.6282
6	129.53	129.54	68.95	49.71	39.39	sp|Q09666|AHNK_HUMAN	Neuroblast differentiation-associated protein AHNAK OS=Homo sapiens GN=AHNAK PE=1 SV=2	2	99	SPSLDVTVPEAELNLETPEISVGGK	Formyl@N-term; iTRAQ8plex(K)@25		-0.0136669	2912.5	971.842	2912.52	971.846	3	16	5.1.1.1525.28	0	38.5163	177.574	38.4025
6	129.53	129.54	68.95	49.71	39.39	sp|Q09666|AHNK_HUMAN	Neuroblast differentiation-associated protein AHNAK OS=Homo sapiens GN=AHNAK PE=1 SV=2	2	99	TVIRLPSGSGAASPTGSAVDIR	Formyl@N-term	missed R-L@4	0.00800501	2139.14	1070.58	2139.13	1070.57	2	24	8.1.1.1768.31	0	27.7305	691.22	27.7356
6	129.53	129.54	68.95	49.71	39.39	sp|Q09666|AHNK_HUMAN	Neuroblast differentiation-associated protein AHNAK OS=Homo sapiens GN=AHNAK PE=1 SV=2	2	99	VDIDAPDVDVHGPDWHLK	iTRAQ8plex@N-term; iTRAQ8plex(K)@18		0.00610468	2635.39	659.855	2635.39	659.854	4	13	4.1.1.1251.11	1	31.5241	208.525	31.5006
6	129.53	129.54	68.95	49.71	39.39	sp|Q09666|AHNK_HUMAN	Neuroblast differentiation-associated protein AHNAK OS=Homo sapiens GN=AHNAK PE=1 SV=2	2	99	VDIDVPDVNIEGPDAK	iTRAQ8plex@N-term; iTRAQ8plex(K)@16		-0.00845124	2303.24	768.754	2303.25	768.756	3	20	2.1.1.632.21	1	27.3801	1463.07	27.3405
6	129.53	129.54	68.95	49.71	39.39	sp|Q09666|AHNK_HUMAN	Neuroblast differentiation-associated protein AHNAK OS=Homo sapiens GN=AHNAK PE=1 SV=2	2	99	VDIDVPDVNIEGPEGK	iTRAQ8plex@N-term; iTRAQ8plex(K)@16		-0.00845124	2303.24	768.754	2303.25	768.756	3	20	2.1.1.632.21	1	27.3801	1463.07	27.3405
6	129.53	129.54	68.95	49.71	39.39	sp|Q09666|AHNK_HUMAN	Neuroblast differentiation-associated protein AHNAK OS=Homo sapiens GN=AHNAK PE=1 SV=2	2	99	VDIDVPDVNLEAPEGK	iTRAQ8plex@N-term; iTRAQ8plex(K)@16		-0.00210559	2317.26	773.428	2317.26	773.428	3	17	3.1.1.717.20	1	27.8208	311.705	27.7824
6	129.53	129.54	68.95	49.71	39.39	sp|Q09666|AHNK_HUMAN	Neuroblast differentiation-associated protein AHNAK OS=Homo sapiens GN=AHNAK PE=1 SV=2	2	99	VDIEAPDVSLEGPEGK	Formyl@N-term; iTRAQ8plex(K)@16		0.00519043	1986.02	994.015	1986.01	994.012	2	16	19.1.1.1016.28	0	28.6854	918.305	28.6333
6	129.53	129.54	68.95	49.71	39.39	sp|Q09666|AHNK_HUMAN	Neuroblast differentiation-associated protein AHNAK OS=Homo sapiens GN=AHNAK PE=1 SV=2	2	99	VDIEGPDVNIEGPEGK	iTRAQ8plex@N-term; iTRAQ8plex(K)@16		-0.00689554	2275.21	759.41	2275.22	759.413	3	16	18.1.1.1006.25	1	29.7995	137.831	29.6899
6	129.53	129.54	68.95	49.71	39.39	sp|Q09666|AHNK_HUMAN	Neuroblast differentiation-associated protein AHNAK OS=Homo sapiens GN=AHNAK PE=1 SV=2	2	99	VDIETPNLEGTLTGPR	Formyl@N-term		-0.00180259	1738.87	870.443	1738.87	870.444	2	18	5.1.1.1434.23	0	32.893	2528.59	32.9114
6	129.53	129.54	68.95	49.71	39.39	sp|Q09666|AHNK_HUMAN	Neuroblast differentiation-associated protein AHNAK OS=Homo sapiens GN=AHNAK PE=1 SV=2	2	99	VDINAPDVDVQGPDWHLK	iTRAQ8plex@N-term; iTRAQ8plex(K)@18		0.0249126	2625.43	657.364	2625.4	657.358	4	17	5.1.1.1373.9	1	29.1196	506.801	29.0996
6	129.53	129.54	68.95	49.71	39.39	sp|Q09666|AHNK_HUMAN	Neuroblast differentiation-associated protein AHNAK OS=Homo sapiens GN=AHNAK PE=1 SV=2	2	99	VDINAPDVDVR	iTRAQ8plex@N-term		0.00112673	1515.82	758.918	1515.82	758.917	2	15	19.1.1.942.22	1	24.0644	756.979	24.2093
6	129.53	129.54	68.95	49.71	39.39	sp|Q09666|AHNK_HUMAN	Neuroblast differentiation-associated protein AHNAK OS=Homo sapiens GN=AHNAK PE=1 SV=2	2	99	VDTNAPDLSLEGPEGK	iTRAQ8plex@N-term; iTRAQ8plex(K)@16		-1.00896	2248.19	750.404	2249.2	750.741	3	17	19.1.1.996.17	0	27.4205	476.706	27.3867
6	129.53	129.54	68.95	49.71	39.39	sp|Q09666|AHNK_HUMAN	Neuroblast differentiation-associated protein AHNAK OS=Homo sapiens GN=AHNAK PE=1 SV=2	2	99	VDVDVPDVNIEGPDAK	iTRAQ8plex@N-term; iTRAQ8plex(K)@16		0.00111511	2289.23	764.085	2289.23	764.084	3	14	20.1.1.1059.18	1	29.1081	252.938	29.0117
6	129.53	129.54	68.95	49.71	39.39	sp|Q09666|AHNK_HUMAN	Neuroblast differentiation-associated protein AHNAK OS=Homo sapiens GN=AHNAK PE=1 SV=2	2	99	VDVECPDVNIEGPEGK	iTRAQ8plex@N-term; Methylthio(C)@5; iTRAQ8plex(K)@16		0.0125855	2353.19	785.403	2353.18	785.399	3	14	2.1.1.632.24	1	27.3851	185.57	27.3405
6	129.53	129.54	68.95	49.71	39.39	sp|Q09666|AHNK_HUMAN	Neuroblast differentiation-associated protein AHNAK OS=Homo sapiens GN=AHNAK PE=1 SV=2	2	99	VDVEVPDVSLEGPEGK	iTRAQ8plex@N-term; iTRAQ8plex(K)@16		-0.998165	2275.24	759.42	2276.24	759.753	3	18	2.1.1.621.21	0	26.7038	1072.36	26.603
6	129.53	129.54	68.95	49.71	39.39	sp|Q09666|AHNK_HUMAN	Neuroblast differentiation-associated protein AHNAK OS=Homo sapiens GN=AHNAK PE=1 SV=2	2	99	VGIDTPDIDIHGPEGK	iTRAQ8plex@N-term; iTRAQ8plex(K)@16		0.00115949	2270.24	568.567	2270.24	568.566	4	13	2.1.1.561.6	1	22.9831	755.21	22.7851
6	129.53	129.54	68.95	49.71	39.39	sp|Q09666|AHNK_HUMAN	Neuroblast differentiation-associated protein AHNAK OS=Homo sapiens GN=AHNAK PE=1 SV=2	2	99	VGVEVPDVNIEGPEGK	iTRAQ8plex@N-term; iTRAQ8plex(K)@16		0.000737501	2245.24	749.421	2245.24	749.421	3	19	3.1.1.674.18	1	25.1678	1251.95	25.1945
6	129.53	129.54	68.95	49.71	39.39	sp|Q09666|AHNK_HUMAN	Neuroblast differentiation-associated protein AHNAK OS=Homo sapiens GN=AHNAK PE=1 SV=2	2	99	VHAPGLNLSGVGGK	Formyl@N-term; iTRAQ8plex(K)@14		-0.00137465	1636.92	546.647	1636.92	546.647	3	16	10.1.1.1604.8	0	24.5454	1199.54	24.5888
6	129.53	129.54	68.95	49.71	39.39	sp|Q09666|AHNK_HUMAN	Neuroblast differentiation-associated protein AHNAK OS=Homo sapiens GN=AHNAK PE=1 SV=2	2	99	VKGGVDVTLPR	Formyl@N-term; iTRAQ8plex(K)@2	missed K-G@2	-0.00559059	1471.86	736.938	1471.87	736.941	2	16	4.1.1.1081.24	0	21.0676	915.716	21.0228
6	129.53	129.54	68.95	49.71	39.39	sp|Q09666|AHNK_HUMAN	Neuroblast differentiation-associated protein AHNAK OS=Homo sapiens GN=AHNAK PE=1 SV=2	2	99	VNVEAPDVNLEGLGGK	iTRAQ8plex@N-term; iTRAQ8plex(K)@16		-0.0136231	2218.23	740.417	2218.24	740.421	3	13	5.1.1.1353.22	1	27.9074	835.835	27.8042
6	129.53	129.54	68.95	49.71	39.39	sp|Q09666|AHNK_HUMAN	Neuroblast differentiation-associated protein AHNAK OS=Homo sapiens GN=AHNAK PE=1 SV=2	2	99	VPDVDIRGPK	iTRAQ8plex@N-term; iTRAQ8plex(K)@10	cleaved Q-V@N-term; missed R-G@7	-0.0108934	1703.01	568.677	1703.02	568.68	3	13	2.1.1.513.4	1	20.0266	2051.32	20.0767
6	129.53	129.54	68.95	49.71	39.39	sp|Q09666|AHNK_HUMAN	Neuroblast differentiation-associated protein AHNAK OS=Homo sapiens GN=AHNAK PE=1 SV=2	2	99	VQANLGAPDINIEGLDAK	Formyl@N-term; iTRAQ8plex(K)@18		0.00449112	2169.16	1085.59	2169.16	1085.59	2	16	5.1.1.1447.29	0	33.707	186.909	33.6536
6	129.53	129.54	68.95	49.71	39.39	sp|Q09666|AHNK_HUMAN	Neuroblast differentiation-associated protein AHNAK OS=Homo sapiens GN=AHNAK PE=1 SV=2	2	99	VSMPDVELNLK	iTRAQ8plex@N-term; iTRAQ8plex(K)@11		-0.0109108	1852.05	618.357	1852.06	618.36	3	14	8.1.1.1806.12	1	30.0418	335.493	30.0167
6	129.53	129.54	68.95	49.71	39.39	sp|Q09666|AHNK_HUMAN	Neuroblast differentiation-associated protein AHNAK OS=Homo sapiens GN=AHNAK PE=1 SV=2	1.85387	99	FGVSTGR	iTRAQ8plex@N-term		-0.00686707	1026.57	514.292	1026.58	514.296	2	12	4.1.1.919.23	1	11.0935	3414.45	11.0502
6	129.53	129.54	68.95	49.71	39.39	sp|Q09666|AHNK_HUMAN	Neuroblast differentiation-associated protein AHNAK OS=Homo sapiens GN=AHNAK PE=1 SV=2	1.35655	99	ADVVVSGPK	iTRAQ8plex@N-term; iTRAQ8plex(K)@9		-0.010368	1478.88	493.968	1478.89	493.971	3	12	19.1.1.888.8	1	20.687	317.978	20.6681
6	129.53	129.54	68.95	49.71	39.39	sp|Q09666|AHNK_HUMAN	Neuroblast differentiation-associated protein AHNAK OS=Homo sapiens GN=AHNAK PE=1 SV=2	1.3098	99	ANVDISAPK	iTRAQ8plex@N-term; iTRAQ8plex(K)@9		0.0177891	1521.92	508.312	1521.9	508.306	3	12	19.1.1.881.7	1	20.2489	609.826	20.0446
6	129.53	129.54	68.95	49.71	39.39	sp|Q09666|AHNK_HUMAN	Neuroblast differentiation-associated protein AHNAK OS=Homo sapiens GN=AHNAK PE=1 SV=2	1.05552	99	MPEMHFRAPK	iTRAQ8plex@N-term; iTRAQ8plex(K)@10	missed R-A@7	-0.0292527	1850.98	618.001	1851.01	618.011	3	12	8.1.1.1685.16	0	22.5835	343.163	22.5516
6	129.53	129.54	68.95	49.71	39.39	sp|Q09666|AHNK_HUMAN	Neuroblast differentiation-associated protein AHNAK OS=Homo sapiens GN=AHNAK PE=1 SV=2	0.970616	99	ADVDVSGPK	iTRAQ8plex@N-term; iTRAQ8plex(K)@9		0.00731462	1494.86	499.293	1494.85	499.291	3	11	14.1.1.776.8	1	20.5704	52.7778	20.614
6	129.53	129.54	68.95	49.71	39.39	sp|Q09666|AHNK_HUMAN	Neuroblast differentiation-associated protein AHNAK OS=Homo sapiens GN=AHNAK PE=1 SV=2	0.826814	99	VKTPSFGISAP	iTRAQ8plex@N-term; iTRAQ8plex(K)@2	cleaved P-Q@C-term; missed K-T@2	-0.00082359	1711.01	571.345	1711.01	571.345	3	11	10.1.1.1608.14	0	24.8024	253.913	24.8358
6	129.53	129.54	68.95	49.71	39.39	sp|Q09666|AHNK_HUMAN	Neuroblast differentiation-associated protein AHNAK OS=Homo sapiens GN=AHNAK PE=1 SV=2	0.38934	99	GSRVDIETPNLEGTLTGPR	Formyl@N-term	missed R-V@3	0.00907505	2039.04	680.686	2039.03	680.683	3	16	3.1.1.675.12	0	25.219	276.566	25.1945
6	129.53	129.54	68.95	49.71	39.39	sp|Q09666|AHNK_HUMAN	Neuroblast differentiation-associated protein AHNAK OS=Homo sapiens GN=AHNAK PE=1 SV=2	0.38405	99	ISMPDVDLHLK	Formyl@N-term; iTRAQ8plex(K)@11		0.00677597	1598.87	800.443	1598.86	800.44	2	12	10.1.1.1750.20	0	33.579	559.082	33.4788
6	129.53	129.54	68.95	49.71	39.39	sp|Q09666|AHNK_HUMAN	Neuroblast differentiation-associated protein AHNAK OS=Homo sapiens GN=AHNAK PE=1 SV=2	0.246417	99	VDVSAPDVEMQGPDWNLK	iTRAQ8plex@N-term; iTRAQ8plex(K)@18		-2.02213	2605.32	652.338	2607.35	652.844	4	14	5.1.1.1384.7	0	29.7923	353.188	29.8373
6	129.53	129.54	68.95	49.71	39.39	sp|Q09666|AHNK_HUMAN	Neuroblast differentiation-associated protein AHNAK OS=Homo sapiens GN=AHNAK PE=1 SV=2	0.231362	99	IDVDAPDIDIHGPDAK	Formyl@N-term; iTRAQ8plex(K)@16		0.00352951	2022.03	675.016	2022.02	675.014	3	15	19.1.1.1075.17	0	32.3414	561.507	32.3076
6	129.53	129.54	68.95	49.71	39.39	sp|Q09666|AHNK_HUMAN	Neuroblast differentiation-associated protein AHNAK OS=Homo sapiens GN=AHNAK PE=1 SV=2	0.222573	99	IDVTAPDVSIEEPEGK	Formyl@N-term; iTRAQ8plex(K)@16		0.00342356	2030.04	1016.03	2030.04	1016.03	2	15	19.1.1.998.28	0	27.5635	1054.66	27.5738
6	129.53	129.54	68.95	49.71	39.39	sp|Q09666|AHNK_HUMAN	Neuroblast differentiation-associated protein AHNAK OS=Homo sapiens GN=AHNAK PE=1 SV=2	0.164309	99	VSAPGVQGDVK	Formyl@N-term; iTRAQ8plex(K)@11		0.00459667	1387.77	694.89	1387.76	694.888	2	12	16.1.1.715.25	0	14.7968	489.33	14.6891
6	129.53	129.54	68.95	49.71	39.39	sp|Q09666|AHNK_HUMAN	Neuroblast differentiation-associated protein AHNAK OS=Homo sapiens GN=AHNAK PE=1 SV=2	0.146302	99	VKVPEVDVR	Formyl@N-term; iTRAQ8plex(K)@2	missed K-V@2	-7.08942e-05	1371.8	686.909	1371.8	686.909	2	12	2.1.1.507.16	0	19.6955	1290.86	19.7105
6	129.53	129.54	68.95	49.71	39.39	sp|Q09666|AHNK_HUMAN	Neuroblast differentiation-associated protein AHNAK OS=Homo sapiens GN=AHNAK PE=1 SV=2	0.115205	99	MSLPDVDLDLKGPK	iTRAQ8plex@N-term; iTRAQ8plex(K)@11; iTRAQ8plex(K)@14	missed K-G@11	-0.0201319	2439.4	610.857	2439.42	610.862	4	13	8.1.1.1810.8	0	30.2818	235.583	30.2634
6	129.53	129.54	68.95	49.71	39.39	sp|Q09666|AHNK_HUMAN	Neuroblast differentiation-associated protein AHNAK OS=Homo sapiens GN=AHNAK PE=1 SV=2	0.076756	99	VGGSGVNVNAK	Formyl@N-term; iTRAQ8plex(K)@11		-0.000585003	1332.73	667.372	1332.73	667.372	2	15	17.1.1.682.26	0	12.7757	1432.41	12.7893
6	129.53	129.54	68.95	49.71	39.39	sp|Q09666|AHNK_HUMAN	Neuroblast differentiation-associated protein AHNAK OS=Homo sapiens GN=AHNAK PE=1 SV=2	0.0614803	99	GEGPEVDVNLPK	Formyl@N-term; iTRAQ8plex(K)@12		-0.0050267	1584.83	793.42	1584.83	793.422	2	14	17.1.1.838.23	0	22.4886	383.144	22.5072
6	129.53	129.54	68.95	49.71	39.39	sp|Q09666|AHNK_HUMAN	Neuroblast differentiation-associated protein AHNAK OS=Homo sapiens GN=AHNAK PE=1 SV=2	0.0438316	99	VTAYTVDVTGR	Formyl@N-term		0.00886101	1208.61	605.313	1208.6	605.309	2	14	3.1.1.610.16	0	21.2172	341.852	21.1858
6	129.53	129.54	68.95	49.71	39.39	sp|Q09666|AHNK_HUMAN	Neuroblast differentiation-associated protein AHNAK OS=Homo sapiens GN=AHNAK PE=1 SV=2	0.0428718	99	VDIDTPDINIEGSEGK	Formyl@N-term; iTRAQ8plex(K)@16		0.00915324	2033.02	1017.52	2033.01	1017.51	2	14	19.1.1.995.29	0	27.3781	335.292	27.3867
6	129.53	129.54	68.95	49.71	39.39	sp|Q09666|AHNK_HUMAN	Neuroblast differentiation-associated protein AHNAK OS=Homo sapiens GN=AHNAK PE=1 SV=2	0.0315171	99	ISMPDIDLNLTGPK	Formyl@N-term; iTRAQ8plex(K)@14		-0.00113003	1844.99	923.5	1844.99	923.5	2	15	16.1.1.1104.29	0	39.0061	800.127	39.1395
6	129.53	129.54	68.95	49.71	39.39	sp|Q09666|AHNK_HUMAN	Neuroblast differentiation-associated protein AHNAK OS=Homo sapiens GN=AHNAK PE=1 SV=2	0.0204516	99	GEGPDVDVNLPK	Formyl@N-term; iTRAQ8plex(K)@12		0.000201065	1570.81	786.415	1570.81	786.415	2	13	17.1.1.827.21	0	21.7993	300.425	21.8834
6	129.53	129.54	68.95	49.71	39.39	sp|Q09666|AHNK_HUMAN	Neuroblast differentiation-associated protein AHNAK OS=Homo sapiens GN=AHNAK PE=1 SV=2	0.0190881	99	GSEVGFHGAAPDISVK	Formyl@N-term; iTRAQ8plex(K)@16		0.0123072	1901.99	635.004	1901.98	635	3	14	3.1.1.606.17	0	20.9733	1136.15	20.9405
6	129.53	129.54	68.95	49.71	39.39	sp|Q09666|AHNK_HUMAN	Neuroblast differentiation-associated protein AHNAK OS=Homo sapiens GN=AHNAK PE=1 SV=2	0.0163737	99	VDIDVPDVDVQGPDWHLK	Formyl@N-term; iTRAQ8plex(K)@18		-0.00379733	2378.2	793.741	2378.21	793.743	3	15	6.1.1.1364.12	0	36.4733	593.41	36.448
6	129.53	129.54	68.95	49.71	39.39	sp|Q09666|AHNK_HUMAN	Neuroblast differentiation-associated protein AHNAK OS=Homo sapiens GN=AHNAK PE=1 SV=2	0.015923	99	FKMPEMHFR	Formyl@N-term; iTRAQ8plex(K)@2	missed K-M@2	-0.0102324	1553.77	777.892	1553.78	777.897	2	11	17.1.1.1151.20	0	41.9076	689.234	41.8688
6	129.53	129.54	68.95	49.71	39.39	sp|Q09666|AHNK_HUMAN	Neuroblast differentiation-associated protein AHNAK OS=Homo sapiens GN=AHNAK PE=1 SV=2	0.0132283	99	VDIDAPDVSIEGPDAK	Formyl@N-term; iTRAQ8plex(K)@16		0.00420214	1972	987.007	1971.99	987.004	2	14	18.1.1.976.10	0	27.9245	104.18	27.8881
6	129.53	129.54	68.95	49.71	39.39	sp|Q09666|AHNK_HUMAN	Neuroblast differentiation-associated protein AHNAK OS=Homo sapiens GN=AHNAK PE=1 SV=2	0.0118872	99	ADIDVSGPKVDVDIPDVNIEGPDAK	Formyl@N-term; iTRAQ8plex(K)@9; iTRAQ8plex(K)@25	missed K-V@9	0.0145293	3213.7	804.433	3213.69	804.429	4	14	3.1.1.783.17	0	31.8778	368.138	31.7826
6	129.53	129.54	68.95	49.71	39.39	sp|Q09666|AHNK_HUMAN	Neuroblast differentiation-associated protein AHNAK OS=Homo sapiens GN=AHNAK PE=1 SV=2	0.0118872	99	ADLDVSGPKVDIDVPDVNIEGPDAK	Formyl@N-term; iTRAQ8plex(K)@9; iTRAQ8plex(K)@25	missed K-V@9	0.0145293	3213.7	804.433	3213.69	804.429	4	14	3.1.1.783.17	0	31.8778	368.138	31.7826
6	129.53	129.54	68.95	49.71	39.39	sp|Q09666|AHNK_HUMAN	Neuroblast differentiation-associated protein AHNAK OS=Homo sapiens GN=AHNAK PE=1 SV=2	0.0118872	99	ADLDVSGPKVDIDVPDVNIEGPEGK	Formyl@N-term; iTRAQ8plex(K)@9; iTRAQ8plex(K)@25	missed K-V@9	0.0145293	3213.7	804.433	3213.69	804.429	4	14	3.1.1.783.17	0	31.8778	368.138	31.7826
6	129.53	129.54	68.95	49.71	39.39	sp|Q09666|AHNK_HUMAN	Neuroblast differentiation-associated protein AHNAK OS=Homo sapiens GN=AHNAK PE=1 SV=2	0.011441	99	GEGPEFDVNLSK	Formyl@N-term; iTRAQ8plex(K)@12		-0.00218442	1622.81	812.411	1622.81	812.412	2	13	19.1.1.933.25	0	23.5082	392.95	23.4614
6	129.53	129.54	68.95	49.71	39.39	sp|Q09666|AHNK_HUMAN	Neuroblast differentiation-associated protein AHNAK OS=Homo sapiens GN=AHNAK PE=1 SV=2	0.00656377	99	GLDLGGRGGVQVPAVDISSSLGGR	Formyl@N-term	missed R-G@7	0.00911073	2294.21	765.743	2294.2	765.74	3	13	16.1.1.1070.18	0	36.8675	227.81	36.7074
6	129.53	129.54	68.95	49.71	39.39	sp|Q09666|AHNK_HUMAN	Neuroblast differentiation-associated protein AHNAK OS=Homo sapiens GN=AHNAK PE=1 SV=2	0.00524306	99	AEGPDVAVDLPK	Formyl@N-term; iTRAQ8plex(K)@12		-0.000987044	1541.82	771.919	1541.82	771.919	2	12	17.1.1.868.19	0	24.3476	105.494	24.3728
6	129.53	129.54	68.95	49.71	39.39	sp|Q09666|AHNK_HUMAN	Neuroblast differentiation-associated protein AHNAK OS=Homo sapiens GN=AHNAK PE=1 SV=2	0.00130484	99	GEIDASVPELEGDLR	iTRAQ8plex@N-term		-7.03405	1895.95	948.982	1902.98	952.499	2	13	20.1.1.1182.28	0	36.7765	405.944	36.7244
6	129.53	129.54	68.95	49.71	39.39	sp|Q09666|AHNK_HUMAN	Neuroblast differentiation-associated protein AHNAK OS=Homo sapiens GN=AHNAK PE=1 SV=2	0.000434512	99	SEDGVEGDLGETQSR	iTRAQ8plex@N-term		-7.03012	1874.86	938.435	1881.89	941.95	2	15	9.1.1.1574.30	0	20.9129	1196.98	20.9196
6	129.53	129.54	68.95	49.71	39.39	sp|Q09666|AHNK_HUMAN	Neuroblast differentiation-associated protein AHNAK OS=Homo sapiens GN=AHNAK PE=1 SV=2	0.00480371	98.93	FGTFGGLGSK	Formyl@N-term; iTRAQ8plex(K)@10		-0.000396777	1301.69	651.853	1301.69	651.853	2	13	18.1.1.997.12	0	29.2165	1227.98	29.378
6	129.53	129.54	68.95	49.71	39.39	sp|Q09666|AHNK_HUMAN	Neuroblast differentiation-associated protein AHNAK OS=Homo sapiens GN=AHNAK PE=1 SV=2	0.879426	98.85	MPEMNIK	iTRAQ8plex@N-term; iTRAQ8plex(K)@7		0.000847032	1469.82	490.947	1469.82	490.947	3	12	5.1.1.1234.11	1	20.5518	4168.72	20.5902
6	129.53	129.54	68.95	49.71	39.39	sp|Q09666|AHNK_HUMAN	Neuroblast differentiation-associated protein AHNAK OS=Homo sapiens GN=AHNAK PE=1 SV=2	0.790485	98.54	MPEMHFR	iTRAQ8plex@N-term		-0.0136957	1250.61	626.311	1250.62	626.318	2	12	7.1.1.1465.24	1	23.5125	3553.56	23.5292
6	129.53	129.54	68.95	49.71	39.39	sp|Q09666|AHNK_HUMAN	Neuroblast differentiation-associated protein AHNAK OS=Homo sapiens GN=AHNAK PE=1 SV=2	0.00261362	98.41	VKGDVDVSLPK	Formyl@N-term; iTRAQ8plex(K)@2; iTRAQ8plex(K)@11	missed K-G@2	-0.0110763	1792.04	598.356	1792.06	598.359	3	14	2.1.1.545.7	0	22.0002	2110.89	21.9835
6	129.53	129.54	68.95	49.71	39.39	sp|Q09666|AHNK_HUMAN	Neuroblast differentiation-associated protein AHNAK OS=Homo sapiens GN=AHNAK PE=1 SV=2	0.00305075	98.37	IKGDVDVTGPK	Formyl@N-term; iTRAQ8plex(K)@2; iTRAQ8plex(K)@11	missed K-G@2	-0.00482792	1764.02	589.014	1764.02	589.015	3	12	19.1.1.946.12	0	24.297	287.286	24.2716
6	129.53	129.54	68.95	49.71	39.39	sp|Q09666|AHNK_HUMAN	Neuroblast differentiation-associated protein AHNAK OS=Homo sapiens GN=AHNAK PE=1 SV=2	0.00217692	98.37	FKAEAPLPSPK	Formyl@N-term; iTRAQ8plex(K)@2; iTRAQ8plex(K)@11	missed K-A@2	-0.015959	1820.05	607.691	1820.07	607.696	3	13	6.1.1.1155.16	0	23.5821	373.597	23.5503
6	129.53	129.54	68.95	49.71	39.39	sp|Q09666|AHNK_HUMAN	Neuroblast differentiation-associated protein AHNAK OS=Homo sapiens GN=AHNAK PE=1 SV=2	0.281498	98.34	EVFSSCSSEVVLSGDDEEYQR	iTRAQ8plex@N-term; Methylthio(C)@6		-0.0340465	2714.17	905.729	2714.2	905.74	3	12	7.1.1.3533.21	0	57.8955	69.0235	57.8548
6	129.53	129.54	68.95	49.71	39.39	sp|Q09666|AHNK_HUMAN	Neuroblast differentiation-associated protein AHNAK OS=Homo sapiens GN=AHNAK PE=1 SV=2	0.0565055	98.15	TPSFGISAP	iTRAQ8plex@N-term	cleaved P-Q@C-term	-0.00358238	1179.64	590.828	1179.64	590.829	2	12	7.1.1.1506.10	0	26.015	760.964	26.055
6	129.53	129.54	68.95	49.71	39.39	sp|Q09666|AHNK_HUMAN	Neuroblast differentiation-associated protein AHNAK OS=Homo sapiens GN=AHNAK PE=1 SV=2	0.686133	98.05	MPEMHFK	iTRAQ8plex@N-term; iTRAQ8plex(K)@7		-0.00372295	1526.82	509.946	1526.82	509.947	3	12	7.1.1.1429.9	1	21.2686	831.607	21.2491
6	129.53	129.54	68.95	49.71	39.39	sp|Q09666|AHNK_HUMAN	Neuroblast differentiation-associated protein AHNAK OS=Homo sapiens GN=AHNAK PE=1 SV=2	0.00261362	97.65	FKMPEMNIK	Formyl@N-term; iTRAQ8plex(K)@2; iTRAQ8plex(K)@9	missed K-M@2	0.000286136	1772.98	592	1772.98	592	3	11	14.1.1.1064.3	0	38.4773	257.166	38.4675
6	129.53	129.54	68.95	49.71	39.39	sp|Q09666|AHNK_HUMAN	Neuroblast differentiation-associated protein AHNAK OS=Homo sapiens GN=AHNAK PE=1 SV=2	0.00217692	97.21	VDINAPDVEVQGK	Formyl@N-term; iTRAQ8plex(K)@13		0.00437066	1714.91	858.462	1714.9	858.459	2	13	18.1.1.903.28	0	23.4056	430.133	23.3535
6	129.53	129.54	68.95	49.71	39.39	sp|Q09666|AHNK_HUMAN	Neuroblast differentiation-associated protein AHNAK OS=Homo sapiens GN=AHNAK PE=1 SV=2	0.00174066	96.93	ADLGVSGPKVDIDVPDVNLEAPEGK	Formyl@N-term; iTRAQ8plex(K)@9; iTRAQ8plex(K)@25	missed K-V@9	0.0267303	3169.72	793.438	3169.7	793.431	4	13	4.1.1.1273.13	0	32.8934	195.158	32.9184
6	129.53	129.54	68.95	49.71	39.39	sp|Q09666|AHNK_HUMAN	Neuroblast differentiation-associated protein AHNAK OS=Homo sapiens GN=AHNAK PE=1 SV=2	0.00174066	96.88	MDIDVPDVEVQGPDWHLK	Formyl@N-term; iTRAQ8plex(K)@18		0.00228364	2424.2	809.073	2424.19	809.072	3	12	6.1.1.1368.15	0	36.726	467.092	36.7577
6	129.53	129.54	68.95	49.71	39.39	sp|Q09666|AHNK_HUMAN	Neuroblast differentiation-associated protein AHNAK OS=Homo sapiens GN=AHNAK PE=1 SV=2	0.00130484	96.55	VDIKAPDVEGQGLDWSLK	Formyl@N-term; iTRAQ8plex(K)@4; iTRAQ8plex(K)@18	missed K-A@4	-0.0084896	2605.41	869.478	2605.42	869.481	3	13	7.1.1.1625.23	0	33.378	198.377	33.3344
6	129.53	129.54	68.95	49.71	39.39	sp|Q09666|AHNK_HUMAN	Neuroblast differentiation-associated protein AHNAK OS=Homo sapiens GN=AHNAK PE=1 SV=2	0.00130484	96.32	MPFLSISSPK	Formyl@N-term; iTRAQ8plex(K)@10		-0.000702661	1437.78	719.899	1437.78	719.899	2	12	4.1.1.1325.9	0	36.0888	327.58	36.1305
7	121.58	121.74	83.5	75.19	70.84	sp|P06396|GELS_HUMAN	Gelsolin OS=Homo sapiens GN=GSN PE=1 SV=1	2	99	AALKTASDFITK	Formyl@N-term; iTRAQ8plex(K)@4; iTRAQ8plex(K)@12	missed K-T@4	-0.0136589	1901.09	634.706	1901.11	634.71	3	13	10.1.1.1654.16	0	27.6465	381.802	27.6151
7	121.58	121.74	83.5	75.19	70.84	sp|P06396|GELS_HUMAN	Gelsolin OS=Homo sapiens GN=GSN PE=1 SV=1	2	99	AGALNSNDAFVLK	iTRAQ8plex@N-term; Deamidated(N)@5; Deamidated(N)@7; iTRAQ8plex(K)@13		-0.00826382	1929.06	644.027	1929.07	644.03	3	18	3.1.1.647.9	0	23.4851	1424.81	23.5268
7	121.58	121.74	83.5	75.19	70.84	sp|P06396|GELS_HUMAN	Gelsolin OS=Homo sapiens GN=GSN PE=1 SV=1	2	99	AGKEPGLQIWR	Formyl@N-term; iTRAQ8plex(K)@3	missed K-E@3	-0.00472998	1585.88	793.949	1585.89	793.951	2	15	9.1.1.1641.23	0	25.0266	11175.3	24.8608
7	121.58	121.74	83.5	75.19	70.84	sp|P06396|GELS_HUMAN	Gelsolin OS=Homo sapiens GN=GSN PE=1 SV=1	2	99	ANSAGATR	iTRAQ8plex@N-term		-0.00787201	1050.56	526.29	1050.57	526.294	2	13	2.1.1.263.29	1	4.6962	274.743	4.7046
7	121.58	121.74	83.5	75.19	70.84	sp|P06396|GELS_HUMAN	Gelsolin OS=Homo sapiens GN=GSN PE=1 SV=1	2	99	AQLDEELGGTPVQSR	Formyl@N-term	cleaved T-A@N-term	0.0143724	1626.8	814.407	1626.78	814.4	2	17	13.1.1.1593.27	0	23.0979	257.325	23.1096
7	121.58	121.74	83.5	75.19	70.84	sp|P06396|GELS_HUMAN	Gelsolin OS=Homo sapiens GN=GSN PE=1 SV=1	2	99	AQPVQVAEGSEPDGFWEALGGK	No iTRAQ8plex@N-term; iTRAQ8plex(K)@22		0.00262892	2575.29	859.437	2575.29	859.436	3	17	7.1.1.1612.21	0	32.5705	1495.88	32.6541
7	121.58	121.74	83.5	75.19	70.84	sp|P06396|GELS_HUMAN	Gelsolin OS=Homo sapiens GN=GSN PE=1 SV=1	2	99	AQPVQVAEGSEPDGFWEALGGKAAYR	Formyl@N-term; iTRAQ8plex(K)@22	missed K-A@22	0.00491112	3064.53	1022.52	3064.52	1022.51	3	19	10.1.1.1764.31	0	34.4621	1202.35	34.529
7	121.58	121.74	83.5	75.19	70.84	sp|P06396|GELS_HUMAN	Gelsolin OS=Homo sapiens GN=GSN PE=1 SV=1	2	99	ATDDVMLLDTW	iTRAQ8plex@N-term	cleaved L-A@N-term; cleaved W-D@C-term	0.022578	1582.81	792.411	1582.79	792.4	2	11	5.1.1.1526.16	0	38.5582	133.103	38.6502
7	121.58	121.74	83.5	75.19	70.84	sp|P06396|GELS_HUMAN	Gelsolin OS=Homo sapiens GN=GSN PE=1 SV=1	2	99	AVEVLPK	iTRAQ8plex@N-term; iTRAQ8plex(K)@7		-0.00742806	1362.86	682.438	1362.87	682.442	2	11	2.1.1.477.28	1	17.8526	6757.57	17.8009
7	121.58	121.74	83.5	75.19	70.84	sp|P06396|GELS_HUMAN	Gelsolin OS=Homo sapiens GN=GSN PE=1 SV=1	2	99	EGGQTAPASTR	iTRAQ8plex@N-term		-0.00157566	1377.71	460.245	1377.72	460.246	3	13	4.1.1.829.21	1	5.5588	131.427	5.5805
7	121.58	121.74	83.5	75.19	70.84	sp|P06396|GELS_HUMAN	Gelsolin OS=Homo sapiens GN=GSN PE=1 SV=1	2	99	EPGLQIWR	iTRAQ8plex@N-term		-0.00966984	1301.73	651.872	1301.74	651.877	2	13	9.1.1.1632.26	1	24.4769	740.832	24.4284
7	121.58	121.74	83.5	75.19	70.84	sp|P06396|GELS_HUMAN	Gelsolin OS=Homo sapiens GN=GSN PE=1 SV=1	2	99	EVQGFESATFLGYFK	Formyl@N-term; iTRAQ8plex(K)@15		0.00396951	2054.03	1028.02	2054.03	1028.02	2	16	18.1.1.1294.9	0	47.7438	324.389	47.6328
7	121.58	121.74	83.5	75.19	70.84	sp|P06396|GELS_HUMAN	Gelsolin OS=Homo sapiens GN=GSN PE=1 SV=1	2	99	FVIEEVPGELMQEDL	iTRAQ8plex@N-term	cleaved L-A@C-term	0.0138856	2051.06	684.693	2051.04	684.689	3	11	5.1.1.1596.4	0	42.8675	127.149	42.8556
7	121.58	121.74	83.5	75.19	70.84	sp|P06396|GELS_HUMAN	Gelsolin OS=Homo sapiens GN=GSN PE=1 SV=1	2	99	FVIEEVPGELMQEDLATD	iTRAQ8plex@N-term	cleaved D-D@C-term	-0.00286335	2338.15	780.391	2338.16	780.393	3	10	5.1.1.1567.16	0	41.0945	153.207	41.0019
7	121.58	121.74	83.5	75.19	70.84	sp|P06396|GELS_HUMAN	Gelsolin OS=Homo sapiens GN=GSN PE=1 SV=1	2	99	GGDSYIILYNYR	Formyl@N-term	cleaved Y-G@N-term	0.0174947	1460.71	731.363	1460.69	731.354	2	14	10.1.1.1696.23	0	30.2478	270.336	30.2044
7	121.58	121.74	83.5	75.19	70.84	sp|P06396|GELS_HUMAN	Gelsolin OS=Homo sapiens GN=GSN PE=1 SV=1	2	99	GGVASGFK	iTRAQ8plex@N-term; iTRAQ8plex(K)@8		-0.00322967	1329.78	444.268	1329.79	444.269	3	12	3.1.1.461.12	1	12.0327	5352.75	12.0076
7	121.58	121.74	83.5	75.19	70.84	sp|P06396|GELS_HUMAN	Gelsolin OS=Homo sapiens GN=GSN PE=1 SV=1	2	99	GGVASGFKHVVPNEVVVQR	Formyl@N-term; iTRAQ8plex(K)@8	missed K-H@8	0.00796338	2310.28	771.102	2310.28	771.099	3	18	8.1.1.1728.27	0	25.255	509.093	25.2048
7	121.58	121.74	83.5	75.19	70.84	sp|P06396|GELS_HUMAN	Gelsolin OS=Homo sapiens GN=GSN PE=1 SV=1	2	99	GIRDNER	iTRAQ8plex@N-term	missed R-D@3	-0.00798045	1162.63	582.321	1162.64	582.325	2	8	1.1.1.665.2	0	12.6529	66.0127	12.0282
7	121.58	121.74	83.5	75.19	70.84	sp|P06396|GELS_HUMAN	Gelsolin OS=Homo sapiens GN=GSN PE=1 SV=1	2	99	GLGLSYLSSHIANVER	iTRAQ8plex@N-term	cleaved D-G@N-term	-0.00289087	2019.1	674.042	2019.11	674.042	3	22	2.1.1.668.7	0	29.5785	641.347	29.3762
7	121.58	121.74	83.5	75.19	70.84	sp|P06396|GELS_HUMAN	Gelsolin OS=Homo sapiens GN=GSN PE=1 SV=1	2	99	GWDDDYWSVDPLDR	Formyl@N-term	cleaved L-G@N-term	-0.00494011	1765.72	883.866	1765.72	883.868	2	17	5.1.1.1487.28	0	36.168	495.765	36.178
7	121.58	121.74	83.5	75.19	70.84	sp|P06396|GELS_HUMAN	Gelsolin OS=Homo sapiens GN=GSN PE=1 SV=1	2	99	HVVPNEVVVQR	iTRAQ8plex@N-term		-0.979094	1577.94	526.986	1578.91	527.312	3	13	2.1.1.406.22	0	13.4694	4758.52	13.2433
7	121.58	121.74	83.5	75.19	70.84	sp|P06396|GELS_HUMAN	Gelsolin OS=Homo sapiens GN=GSN PE=1 SV=1	2	99	IEGSNKVPVDPATYGQFYGGDSYIILYNYR	Formyl@N-term; iTRAQ8plex(K)@6	missed K-V@6	-0.00214024	3730.84	1244.62	3730.85	1244.62	3	15	17.1.1.1192.31	0	44.4846	777.624	44.9268
7	121.58	121.74	83.5	75.19	70.84	sp|P06396|GELS_HUMAN	Gelsolin OS=Homo sapiens GN=GSN PE=1 SV=1	2	99	KGGVASGFK	iTRAQ8plex@N-term; iTRAQ8plex(K)@1; iTRAQ8plex(K)@9	missed K-G@1	-0.00404437	1762.08	588.368	1762.09	588.37	3	14	4.1.1.930.29	1	11.7799	216.142	11.7266
7	121.58	121.74	83.5	75.19	70.84	sp|P06396|GELS_HUMAN	Gelsolin OS=Homo sapiens GN=GSN PE=1 SV=1	2	99	LFACSNK	iTRAQ8plex@N-term; Methylthio(C)@4; iTRAQ8plex(K)@7		-0.00773506	1435.77	479.597	1435.78	479.6	3	11	2.1.1.581.3	1	24.2116	15808.3	24.0161
7	121.58	121.74	83.5	75.19	70.84	sp|P06396|GELS_HUMAN	Gelsolin OS=Homo sapiens GN=GSN PE=1 SV=1	2	99	LSSHIANVER	iTRAQ8plex@N-term	cleaved Y-L@N-term	-0.000431005	1428.8	477.274	1428.8	477.274	3	17	4.1.1.952.6	0	13.1067	1610.12	13.1451
7	121.58	121.74	83.5	75.19	70.84	sp|P06396|GELS_HUMAN	Gelsolin OS=Homo sapiens GN=GSN PE=1 SV=1	2	99	MVVEHPEFLK	iTRAQ8plex@N-term; iTRAQ8plex(K)@10	cleaved S-M@N-term	0.0157956	1836.06	460.022	1836.04	460.018	4	18	6.1.1.1173.2	0	24.6721	1187.86	24.7255
7	121.58	121.74	83.5	75.19	70.84	sp|P06396|GELS_HUMAN	Gelsolin OS=Homo sapiens GN=GSN PE=1 SV=1	2	99	NWRDPDQTDGLGLSYL	iTRAQ8plex@N-term	cleaved L-S@C-term; missed R-D@3	0.00876972	2153.08	718.7	2153.07	718.697	3	15	8.1.1.1828.16	0	31.4073	1387.1	31.4374
7	121.58	121.74	83.5	75.19	70.84	sp|P06396|GELS_HUMAN	Gelsolin OS=Homo sapiens GN=GSN PE=1 SV=1	2	99	NWRDPDQTDGLGLSYLSSHIANVER	Formyl@N-term	missed R-D@3	-0.00219941	2870.36	957.793	2870.36	957.793	3	14	17.1.1.1217.23	0	46.0335	262.272	45.8021
7	121.58	121.74	83.5	75.19	70.84	sp|P06396|GELS_HUMAN	Gelsolin OS=Homo sapiens GN=GSN PE=1 SV=1	2	99	QGQIIYNWQGAQSTQDEVAASAILTAQLDEELGGTPVQSR	Gln->pyro-Glu@N-term		-0.0121562	4255.05	1064.77	4255.07	1064.77	4	17	10.1.1.2093.25	0	49.4337	440.358	49.3856
7	121.58	121.74	83.5	75.19	70.84	sp|P06396|GELS_HUMAN	Gelsolin OS=Homo sapiens GN=GSN PE=1 SV=1	2	99	QLDEELGGTPVQSR	Formyl@N-term	cleaved A-Q@N-term	0.00838566	1555.76	778.885	1555.75	778.881	2	16	14.1.1.753.29	0	19.1702	701.639	19.1163
7	121.58	121.74	83.5	75.19	70.84	sp|P06396|GELS_HUMAN	Gelsolin OS=Homo sapiens GN=GSN PE=1 SV=1	2	99	QTQVSVLPEGGETPLFK	Formyl@N-term; iTRAQ8plex(K)@17		0.00370164	2161.16	721.394	2161.16	721.393	3	17	6.1.1.1311.8	0	33.1862	7269.56	33.2915
7	121.58	121.74	83.5	75.19	70.84	sp|P06396|GELS_HUMAN	Gelsolin OS=Homo sapiens GN=GSN PE=1 SV=1	2	99	RTPITVVK	iTRAQ8plex@N-term; iTRAQ8plex(K)@8	missed R-T@1	-0.00509211	1520.98	508.001	1520.99	508.003	3	13	5.1.1.1170.15	1	16.6055	8850.21	16.3901
7	121.58	121.74	83.5	75.19	70.84	sp|P06396|GELS_HUMAN	Gelsolin OS=Homo sapiens GN=GSN PE=1 SV=1	2	99	RYIETDPANR	Formyl@N-term	missed R-Y@1	-0.00302767	1261.6	631.808	1261.61	631.81	2	17	9.1.1.1419.27	0	11.353	2821.71	11.3647
7	121.58	121.74	83.5	75.19	70.84	sp|P06396|GELS_HUMAN	Gelsolin OS=Homo sapiens GN=GSN PE=1 SV=1	2	99	SEDCFILDHGK	iTRAQ8plex@N-term; Methylthio(C)@4; iTRAQ8plex(K)@11		-0.0102536	1916.95	480.244	1916.96	480.247	4	15	5.1.1.1312.2	1	25.3528	1192.65	25.4062
7	121.58	121.74	83.5	75.19	70.84	sp|P06396|GELS_HUMAN	Gelsolin OS=Homo sapiens GN=GSN PE=1 SV=1	2	99	SVLPEGGETPLFK	iTRAQ8plex@N-term; iTRAQ8plex(K)@13	cleaved V-S@N-term	-0.00424694	1981.13	661.384	1981.13	661.385	3	16	6.1.1.1230.13	0	28.2065	460.791	28.1798
7	121.58	121.74	83.5	75.19	70.84	sp|P06396|GELS_HUMAN	Gelsolin OS=Homo sapiens GN=GSN PE=1 SV=1	2	99	SYLSSHIANVER	Formyl@N-term	cleaved L-S@N-term	0.0061063	1402.69	702.352	1402.68	702.349	2	14	4.1.1.1035.31	0	18.2447	565.694	18.1883
7	121.58	121.74	83.5	75.19	70.84	sp|P06396|GELS_HUMAN	Gelsolin OS=Homo sapiens GN=GSN PE=1 SV=1	2	99	TASDFITK	iTRAQ8plex@N-term; No iTRAQ8plex(K)@8		-0.00628207	1185.65	593.832	1185.65	593.835	2	14	2.1.1.403.29	0	13.2966	1959.58	13.305
7	121.58	121.74	83.5	75.19	70.84	sp|P06396|GELS_HUMAN	Gelsolin OS=Homo sapiens GN=GSN PE=1 SV=1	2	99	TGAQELLR	iTRAQ8plex@N-term		-0.00521135	1190.69	596.351	1190.69	596.354	2	13	2.1.1.436.23	1	15.3127	5957.49	14.6522
7	121.58	121.74	83.5	75.19	70.84	sp|P06396|GELS_HUMAN	Gelsolin OS=Homo sapiens GN=GSN PE=1 SV=1	2	99	TPITVVK	iTRAQ8plex@N-term; iTRAQ8plex(K)@7		-0.00616272	1364.88	683.447	1364.89	683.45	2	12	4.1.1.1013.28	1	16.8845	498.266	16.8328
7	121.58	121.74	83.5	75.19	70.84	sp|P06396|GELS_HUMAN	Gelsolin OS=Homo sapiens GN=GSN PE=1 SV=1	2	99	TPSAAYLWVGTGASEAEK	Formyl@N-term; iTRAQ8plex(K)@18		-0.0155755	2169.07	1085.54	2169.09	1085.55	2	16	11.1.1.1749.31	0	34.5245	228.543	34.4063
7	121.58	121.74	83.5	75.19	70.84	sp|P06396|GELS_HUMAN	Gelsolin OS=Homo sapiens GN=GSN PE=1 SV=1	2	99	TPSAAYLWVGTGASEAEKTGAQELLR	Formyl@N-term; iTRAQ8plex(K)@18	missed K-T@18	-0.0080697	3037.56	1013.53	3037.57	1013.53	3	16	13.1.1.1975.28	0	46.6814	1059.11	46.6914
7	121.58	121.74	83.5	75.19	70.84	sp|P06396|GELS_HUMAN	Gelsolin OS=Homo sapiens GN=GSN PE=1 SV=1	2	99	VHVSEEGTEPEAMLQVLGPK	Formyl@N-term; iTRAQ8plex(K)@20	cleaved K-P@C-term	-0.00339642	2481.27	828.097	2481.27	828.098	3	17	6.1.1.1318.17	0	33.6341	523.721	33.6625
7	121.58	121.74	83.5	75.19	70.84	sp|P06396|GELS_HUMAN	Gelsolin OS=Homo sapiens GN=GSN PE=1 SV=1	2	99	VHVSEEGTEPEAMLQVLGPKPALPAGTEDTAK	Formyl@N-term; iTRAQ8plex(K)@20; iTRAQ8plex(K)@32		0.00368223	3937.06	985.273	3937.06	985.272	4	20	8.1.1.1862.27	0	33.5246	991.036	33.3507
7	121.58	121.74	83.5	75.19	70.84	sp|P06396|GELS_HUMAN	Gelsolin OS=Homo sapiens GN=GSN PE=1 SV=1	2	99	VHVSEEGTEPEAMLQVLGPKPALPAGTEDTAKEDAANR	Formyl@N-term; iTRAQ8plex(K)@20; iTRAQ8plex(K)@32	missed K-E@32	0.0233188	4593.37	919.682	4593.35	919.677	5	20	7.1.1.1623.24	0	33.2559	5152.81	33.2108
7	121.58	121.74	83.5	75.19	70.84	sp|P06396|GELS_HUMAN	Gelsolin OS=Homo sapiens GN=GSN PE=1 SV=1	2	99	VPFDAATLHTST	iTRAQ8plex@N-term	cleaved T-A@C-term	-0.0116999	1562.81	782.414	1562.82	782.42	2	17	8.1.1.1708.30	0	24.0237	904.157	24.0304
7	121.58	121.74	83.5	75.19	70.84	sp|P06396|GELS_HUMAN	Gelsolin OS=Homo sapiens GN=GSN PE=1 SV=1	2	99	VPFDAATLHTSTAM	Formyl@N-term	cleaved M-A@C-term	0.0175032	1488.71	745.362	1488.69	745.353	2	17	10.1.1.1735.17	0	32.6472	414.814	32.6756
7	121.58	121.74	83.5	75.19	70.84	sp|P06396|GELS_HUMAN	Gelsolin OS=Homo sapiens GN=GSN PE=1 SV=1	2	99	VPFDAATLHTSTAMA	Formyl@N-term	cleaved A-A@C-term	0.00222447	1559.73	780.873	1559.73	780.872	2	16	12.1.1.942.27	0	31.293	777.583	31.2426
7	121.58	121.74	83.5	75.19	70.84	sp|P06396|GELS_HUMAN	Gelsolin OS=Homo sapiens GN=GSN PE=1 SV=1	2	99	VPFDAATLHTSTAMAA	Formyl@N-term	cleaved A-Q@C-term	0.00341972	1630.77	816.392	1630.77	816.39	2	15	12.1.1.944.28	0	31.4192	915.794	31.4294
7	121.58	121.74	83.5	75.19	70.84	sp|P06396|GELS_HUMAN	Gelsolin OS=Homo sapiens GN=GSN PE=1 SV=1	2	99	VPFDAATLHTSTAMAAQHGMDDDGTGQK	Formyl@N-term; iTRAQ8plex(K)@28		0.0021691	3204.48	1069.17	3204.48	1069.17	3	19	10.1.1.1634.31	0	26.4362	1864.72	26.6266
7	121.58	121.74	83.5	75.19	70.84	sp|P06396|GELS_HUMAN	Gelsolin OS=Homo sapiens GN=GSN PE=1 SV=1	2	99	VSNGAGTMSVSLVADENPFAQGALK	iTRAQ8plex@N-term; Deamidated(N)@3; iTRAQ8plex(K)@25		0.00228292	3071.61	1024.88	3071.61	1024.88	3	23	9.1.1.1795.30	0	34.5469	1430.29	34.6156
7	121.58	121.74	83.5	75.19	70.84	sp|P06396|GELS_HUMAN	Gelsolin OS=Homo sapiens GN=GSN PE=1 SV=1	2	99	VVEHPEFLK	iTRAQ8plex@N-term; iTRAQ8plex(K)@9	cleaved M-V@N-term	-0.00690733	1705	569.339	1705	569.341	3	15	4.1.1.1053.18	0	19.336	8520.48	19.4244
7	121.58	121.74	83.5	75.19	70.84	sp|P06396|GELS_HUMAN	Gelsolin OS=Homo sapiens GN=GSN PE=1 SV=1	2	99	YIETDPANR	iTRAQ8plex@N-term		-0.00183964	1381.71	691.864	1381.71	691.865	2	13	15.1.1.1562.26	1	18.5117	2957.23	18.3399
7	121.58	121.74	83.5	75.19	70.84	sp|P06396|GELS_HUMAN	Gelsolin OS=Homo sapiens GN=GSN PE=1 SV=1	2	99	YIETDPANRDR	iTRAQ8plex@N-term	missed R-D@9	-0.00663688	1652.84	551.953	1652.84	551.955	3	13	15.1.1.1741.17	1	29.5616	3412.81	29.8993
7	121.58	121.74	83.5	75.19	70.84	sp|P06396|GELS_HUMAN	Gelsolin OS=Homo sapiens GN=GSN PE=1 SV=1	1.79588	99	PDQTDGLGLSYLSSHIANVER	No iTRAQ8plex@N-term	cleaved D-P@N-term	0.00874883	2271.12	758.048	2271.11	758.045	3	23	22.1.1.4958.4	0	43.016	482.388	42.9789
7	121.58	121.74	83.5	75.19	70.84	sp|P06396|GELS_HUMAN	Gelsolin OS=Homo sapiens GN=GSN PE=1 SV=1	1.16115	99	DSQEEEKTEALTSAK	Formyl@N-term; iTRAQ8plex(K)@7; iTRAQ8plex(K)@15	missed K-T@7	0.0124126	2301.19	768.071	2301.18	768.067	3	14	11.1.1.1552.24	0	22.3707	293.411	22.5109
7	121.58	121.74	83.5	75.19	70.84	sp|P06396|GELS_HUMAN	Gelsolin OS=Homo sapiens GN=GSN PE=1 SV=1	1.1549	99	LKATQVSK	Formyl@N-term; iTRAQ8plex(K)@2; iTRAQ8plex(K)@8	missed K-A@2	-0.00714625	1509.93	504.316	1509.93	504.319	3	12	2.1.1.398.15	0	12.964	9788.79	12.9336
7	121.58	121.74	83.5	75.19	70.84	sp|P06396|GELS_HUMAN	Gelsolin OS=Homo sapiens GN=GSN PE=1 SV=1	0.974694	99	AILTAQLDEELGGTPVQSR	iTRAQ8plex@N-term	cleaved S-A@N-term	-0.00834361	2301.24	768.087	2301.25	768.09	3	13	8.1.1.1841.19	0	32.2154	199.676	32.0549
7	121.58	121.74	83.5	75.19	70.84	sp|P06396|GELS_HUMAN	Gelsolin OS=Homo sapiens GN=GSN PE=1 SV=1	0.725842	99	FDLVPVPTNL	iTRAQ8plex@N-term	cleaved L-Y@C-term	-0.00204303	1417.81	709.912	1417.81	709.913	2	10	18.1.1.1193.16	0	41.4277	331.292	41.458
7	121.58	121.74	83.5	75.19	70.84	sp|P06396|GELS_HUMAN	Gelsolin OS=Homo sapiens GN=GSN PE=1 SV=1	0.67162	99	ATEVPVSWESF	iTRAQ8plex@N-term	cleaved F-N@C-term	-0.00652984	1554.78	778.398	1554.79	778.401	2	13	6.1.1.1318.16	0	33.6325	587.014	33.6625
7	121.58	121.74	83.5	75.19	70.84	sp|P06396|GELS_HUMAN	Gelsolin OS=Homo sapiens GN=GSN PE=1 SV=1	0.661543	99	RYIETDPANRDR	Formyl@N-term	missed R-Y@1; missed R-D@10	0.000236835	1532.73	767.374	1532.73	767.374	2	15	9.1.1.1399.30	0	10.1225	1710.99	10.1909
7	121.58	121.74	83.5	75.19	70.84	sp|P06396|GELS_HUMAN	Gelsolin OS=Homo sapiens GN=GSN PE=1 SV=1	0.431798	99	VSNGAGTMSVSL	iTRAQ8plex@N-term; Deamidated(N)@3	cleaved L-V@C-term	-0.0064401	1426.72	714.368	1426.73	714.371	2	13	3.1.1.645.16	0	23.3733	238.182	23.3417
7	121.58	121.74	83.5	75.19	70.84	sp|P06396|GELS_HUMAN	Gelsolin OS=Homo sapiens GN=GSN PE=1 SV=1	0.393619	99	EGGQTAPASTRLFQVR	Formyl@N-term	missed R-L@11	0.0101655	1744.9	873.455	1744.89	873.45	2	15	6.1.1.1133.24	0	22.2482	1134.19	22.2565
7	121.58	121.74	83.5	75.19	70.84	sp|P06396|GELS_HUMAN	Gelsolin OS=Homo sapiens GN=GSN PE=1 SV=1	0.338187	99	TASDFITKMDYPK	iTRAQ8plex@N-term; iTRAQ8plex(K)@8; iTRAQ8plex(K)@13	missed K-M@8	0.965803	2429.31	608.335	2428.34	608.093	4	14	8.1.1.1720.19	0	24.747	240.396	24.7103
7	121.58	121.74	83.5	75.19	70.84	sp|P06396|GELS_HUMAN	Gelsolin OS=Homo sapiens GN=GSN PE=1 SV=1	0.229885	99	EPAHLMSLFGGKPMIIYK	Formyl@N-term; iTRAQ8plex(K)@12; iTRAQ8plex(K)@18		0.00461938	2667.48	667.877	2667.47	667.876	4	13	7.1.1.1762.9	0	41.8123	104.593	41.7301
7	121.58	121.74	83.5	75.19	70.84	sp|P06396|GELS_HUMAN	Gelsolin OS=Homo sapiens GN=GSN PE=1 SV=1	0.149354	99	VQLDDYLNGR	iTRAQ8plex@N-term; Deamidated(N)@8	cleaved T-V@N-term	-0.0184676	1496.76	749.387	1496.78	749.396	2	14	5.1.1.1279.29	0	23.3583	208.265	23.3048
7	121.58	121.74	83.5	75.19	70.84	sp|P06396|GELS_HUMAN	Gelsolin OS=Homo sapiens GN=GSN PE=1 SV=1	0.145694	99	NWRDPDQTDGLGLSY	Formyl@N-term	cleaved Y-L@C-term; missed R-D@3	-0.00348932	1763.77	882.893	1763.78	882.895	2	16	3.1.1.698.29	0	26.6617	1336.31	26.6701
7	121.58	121.74	83.5	75.19	70.84	sp|P06396|GELS_HUMAN	Gelsolin OS=Homo sapiens GN=GSN PE=1 SV=1	0.0990869	99	MDYPKQTQVSVLPEGGETPLFK	Formyl@N-term; iTRAQ8plex(K)@5; iTRAQ8plex(K)@22	missed K-Q@5	0.000718639	3099.64	775.918	3099.64	775.918	4	13	8.1.1.1850.20	0	32.7718	1105.53	32.8568
7	121.58	121.74	83.5	75.19	70.84	sp|P06396|GELS_HUMAN	Gelsolin OS=Homo sapiens GN=GSN PE=1 SV=1	0.0127808	99	VHVSEEGTEPEAMLQVLGPKPALPAGTEDTAKEDAA	iTRAQ8plex@N-term; iTRAQ8plex(K)@20; iTRAQ8plex(K)@32	cleaved A-N@C-term; missed K-E@32	-6.04309	4593.37	919.682	4599.41	920.89	5	16	7.1.1.1617.24	0	32.8849	5152.81	33.2108
7	121.58	121.74	83.5	75.19	70.84	sp|P06396|GELS_HUMAN	Gelsolin OS=Homo sapiens GN=GSN PE=1 SV=1	0.00744648	99	SSHIANVER	Formyl@N-term	cleaved L-S@N-term	0.00298404	1039.51	520.761	1039.5	520.76	2	13	8.1.1.1476.23	0	9.7431	282.724	9.7002
7	121.58	121.74	83.5	75.19	70.84	sp|P06396|GELS_HUMAN	Gelsolin OS=Homo sapiens GN=GSN PE=1 SV=1	0.00305075	99	DPDQTDGLGLSYLSSHIANVER	Formyl@N-term; Deamidated(Q)@4		0.0458884	2415.17	1208.59	2415.12	1208.57	2	15	12.1.1.1017.31	0	35.9663	121.575	35.7844
7	121.58	121.74	83.5	75.19	70.84	sp|P06396|GELS_HUMAN	Gelsolin OS=Homo sapiens GN=GSN PE=1 SV=1	1.30103	98.99	MDAHPPR	iTRAQ8plex@N-term; Oxidation(M)@1		0.0106905	1142.59	381.871	1142.58	381.868	3	10	11.1.1.1612.2	0	26.0397	135.462	26.0931
7	121.58	121.74	83.5	75.19	70.84	sp|P06396|GELS_HUMAN	Gelsolin OS=Homo sapiens GN=GSN PE=1 SV=1	0.118615	98.74	QGFEPPSFVGW	iTRAQ8plex@N-term	cleaved W-F@C-term	0.00394914	1553.79	777.9	1553.78	777.898	2	12	16.1.1.1057.18	0	36.0571	226.484	36.0216
7	121.58	121.74	83.5	75.19	70.84	sp|P06396|GELS_HUMAN	Gelsolin OS=Homo sapiens GN=GSN PE=1 SV=1	0.0830199	98.48	NWRDPDQTDGLGLSYLSS	iTRAQ8plex@N-term	cleaved S-H@C-term; missed R-D@3	0.0266501	2327.16	776.727	2327.13	776.719	3	12	8.1.1.1781.26	0	28.5252	611.091	28.5386
7	121.58	121.74	83.5	75.19	70.84	sp|P06396|GELS_HUMAN	Gelsolin OS=Homo sapiens GN=GSN PE=1 SV=1	0.00174066	98.06	VEKFDLVPVPTNL	Formyl@N-term; iTRAQ8plex(K)@3	cleaved L-Y@C-term; missed K-F@3	0.00264416	1802.02	902.015	1802.01	902.014	2	12	12.1.1.1120.22	0	42.3699	333.455	42.6373
7	121.58	121.74	83.5	75.19	70.84	sp|P06396|GELS_HUMAN	Gelsolin OS=Homo sapiens GN=GSN PE=1 SV=1	0.00174066	97.83	GKEPGLQIWR	Formyl@N-term; iTRAQ8plex(K)@2	cleaved A-G@N-term; missed K-E@2	0.0120828	1514.86	505.962	1514.85	505.958	3	12	8.1.1.1717.9	0	24.5448	214.179	24.5247
7	121.58	121.74	83.5	75.19	70.84	sp|P06396|GELS_HUMAN	Gelsolin OS=Homo sapiens GN=GSN PE=1 SV=1	0.0268721	97.4	SEDCFILDHGKDGK	Formyl@N-term; Methylthio(C)@4; iTRAQ8plex(K)@11; iTRAQ8plex(K)@14	missed K-D@11	0.00574106	2245.1	562.283	2245.1	562.281	4	13	4.1.1.1132.11	0	24.1817	6970	24.0347
7	121.58	121.74	83.5	75.19	70.84	sp|P06396|GELS_HUMAN	Gelsolin OS=Homo sapiens GN=GSN PE=1 SV=1	0.401209	97.25	ATEVPVSWESFN	iTRAQ8plex@N-term	cleaved N-N@C-term	0.00534259	1668.84	835.425	1668.83	835.422	2	12	7.1.1.1578.29	0	30.4891	205.011	30.4975
7	121.58	121.74	83.5	75.19	70.84	sp|P06396|GELS_HUMAN	Gelsolin OS=Homo sapiens GN=GSN PE=1 SV=1	0.000434512	96.76	ELGGTPVQSR	Formyl@N-term	cleaved E-E@N-term	-0.00476283	1070.53	536.273	1070.54	536.275	2	13	10.1.1.1424.14	0	13.4585	891.571	13.6153
7	121.58	121.74	83.5	75.19	70.84	sp|P06396|GELS_HUMAN	Gelsolin OS=Homo sapiens GN=GSN PE=1 SV=1	0.00130484	96.13	GLSYLSSHIANVER	Formyl@N-term	cleaved L-G@N-term	0.00212945	1572.79	787.403	1572.79	787.402	2	13	16.1.1.1012.26	0	33.2659	165.342	33.0925
7	121.58	121.74	83.5	75.19	70.84	sp|P06396|GELS_HUMAN	Gelsolin OS=Homo sapiens GN=GSN PE=1 SV=1	0.307153	95.99	RTPITVVKQ	iTRAQ8plex@N-term; iTRAQ8plex(K)@8	cleaved Q-G@C-term; missed R-T@1; missed K-Q@8	0.000442858	1649.05	413.269	1649.04	413.269	4	11	5.1.1.1157.4	0	15.7859	223.509	15.7748
7	121.58	121.74	83.5	75.19	70.84	sp|P06396|GELS_HUMAN	Gelsolin OS=Homo sapiens GN=GSN PE=1 SV=1	0.276544	95.59	VPFDAATL	iTRAQ8plex@N-term	cleaved L-H@C-term	-0.00882207	1136.63	569.322	1136.64	569.326	2	11	7.1.1.1591.5	0	31.2482	213.814	31.2966
8	105.6	105.6	94.92	90.02	84.37	sp|P14618|KPYM_HUMAN	Pyruvate kinase isozymes M1/M2 OS=Homo sapiens GN=PKM2 PE=1 SV=4	2	99	AEGSDVANAVLDGADCIMLSGETAK	Formyl@N-term; Methylthio(C)@16; iTRAQ8plex(K)@25		-0.0135257	2814.29	939.104	2814.3	939.108	3	19	8.1.1.2034.23	0	44.1547	2316.35	44.235
8	105.6	105.6	94.92	90.02	84.37	sp|P14618|KPYM_HUMAN	Pyruvate kinase isozymes M1/M2 OS=Homo sapiens GN=PKM2 PE=1 SV=4	2	99	AEGSDVANAVLDGADCIMLSGETAKGDYPLEAVR	Formyl@N-term; Methylthio(C)@16; iTRAQ8plex(K)@25	missed K-G@25	0.0054253	3814.81	954.709	3814.8	954.707	4	22	9.1.1.1971.24	0	45.4181	3485.81	45.249
8	105.6	105.6	94.92	90.02	84.37	sp|P14618|KPYM_HUMAN	Pyruvate kinase isozymes M1/M2 OS=Homo sapiens GN=PKM2 PE=1 SV=4	2	99	AGKPVICATQMLESMIK	Formyl@N-term; iTRAQ8plex(K)@3; Methylthio(C)@7; iTRAQ8plex(K)@17		0.00219835	2501.34	626.341	2501.33	626.341	4	21	6.1.1.1536.3	0	47.1037	1588.76	47.093
8	105.6	105.6	94.92	90.02	84.37	sp|P14618|KPYM_HUMAN	Pyruvate kinase isozymes M1/M2 OS=Homo sapiens GN=PKM2 PE=1 SV=4	2	99	AMADTFLEHMCR	Formyl@N-term; Methylthio(C)@11	cleaved A-A@N-term	-0.00128022	1497.59	749.8	1497.59	749.801	2	15	2.1.1.830.12	0	39.5847	378.719	39.6834
8	105.6	105.6	94.92	90.02	84.37	sp|P14618|KPYM_HUMAN	Pyruvate kinase isozymes M1/M2 OS=Homo sapiens GN=PKM2 PE=1 SV=4	2	99	APIIAVTR	iTRAQ8plex@N-term		0.00123259	1143.73	572.872	1143.73	572.871	2	14	8.1.1.1650.23	1	20.4421	75666.2	20.5836
8	105.6	105.6	94.92	90.02	84.37	sp|P14618|KPYM_HUMAN	Pyruvate kinase isozymes M1/M2 OS=Homo sapiens GN=PKM2 PE=1 SV=4	2	99	APIIAVTRNPQTAR	Formyl@N-term	missed R-N@8	0.00209878	1534.86	768.437	1534.86	768.436	2	21	7.1.1.1456.28	0	22.9631	6206.63	22.9113
8	105.6	105.6	94.92	90.02	84.37	sp|P14618|KPYM_HUMAN	Pyruvate kinase isozymes M1/M2 OS=Homo sapiens GN=PKM2 PE=1 SV=4	2	99	ASDVHEVR	Formyl@N-term		-0.00292598	939.438	470.726	939.441	470.728	2	13	4.1.1.844.20	0	6.4771	1498.93	6.4388
8	105.6	105.6	94.92	90.02	84.37	sp|P14618|KPYM_HUMAN	Pyruvate kinase isozymes M1/M2 OS=Homo sapiens GN=PKM2 PE=1 SV=4	2	99	CDENILWLDYK	iTRAQ8plex@N-term; Methylthio(C)@1; iTRAQ8plex(K)@11		-0.000923155	2065.05	689.356	2065.05	689.356	3	15	10.1.1.1775.15	1	35.1156	570.698	35.1473
8	105.6	105.6	94.92	90.02	84.37	sp|P14618|KPYM_HUMAN	Pyruvate kinase isozymes M1/M2 OS=Homo sapiens GN=PKM2 PE=1 SV=4	2	99	DPVQEAWAEDVDLR	Formyl@N-term		0.0034512	1669.76	835.888	1669.76	835.886	2	16	17.1.1.980.29	0	31.319	435.038	31.2655
8	105.6	105.6	94.92	90.02	84.37	sp|P14618|KPYM_HUMAN	Pyruvate kinase isozymes M1/M2 OS=Homo sapiens GN=PKM2 PE=1 SV=4	2	99	EAEAAIYHLQLFEELR	Formyl@N-term		-0.000815979	1958.97	980.494	1958.97	980.494	2	17	13.1.1.2024.21	0	49.4086	56.0102	49.3642
8	105.6	105.6	94.92	90.02	84.37	sp|P14618|KPYM_HUMAN	Pyruvate kinase isozymes M1/M2 OS=Homo sapiens GN=PKM2 PE=1 SV=4	2	99	EAEAAIYHLQLFEELRR	Formyl@N-term	missed R-R@16	0.000218985	2115.07	706.032	2115.07	706.032	3	14	21.1.1.1844.8	0	45.666	114.008	45.6457
8	105.6	105.6	94.92	90.02	84.37	sp|P14618|KPYM_HUMAN	Pyruvate kinase isozymes M1/M2 OS=Homo sapiens GN=PKM2 PE=1 SV=4	2	99	FDEILEASDGIMVAR	Formyl@N-term		-0.00601169	1692.8	847.406	1692.8	847.409	2	14	9.1.1.1941.6	0	43.5331	354.839	43.5798
8	105.6	105.6	94.92	90.02	84.37	sp|P14618|KPYM_HUMAN	Pyruvate kinase isozymes M1/M2 OS=Homo sapiens GN=PKM2 PE=1 SV=4	2	99	FGVEQDVDMVFASFIR	Delta:H(2)C(2)@N-term		0.0371782	1884.95	629.322	1884.91	629.31	3	17	2.1.1.953.3	0	47.1963	420.737	47.1859
8	105.6	105.6	94.92	90.02	84.37	sp|P14618|KPYM_HUMAN	Pyruvate kinase isozymes M1/M2 OS=Homo sapiens GN=PKM2 PE=1 SV=4	2	99	GADFLVTEVENGGSLGSK	Formyl@N-term; Deamidated(N)@11; iTRAQ8plex(K)@18		-0.00493249	2112.05	705.023	2112.05	705.025	3	19	2.1.1.737.11	0	33.8464	2686	33.8848
8	105.6	105.6	94.92	90.02	84.37	sp|P14618|KPYM_HUMAN	Pyruvate kinase isozymes M1/M2 OS=Homo sapiens GN=PKM2 PE=1 SV=4	2	99	GDLGIEIPAEK	iTRAQ8plex@N-term; No iTRAQ8plex(K)@11		-0.00168444	1444.81	723.41	1444.81	723.411	2	19	2.1.1.541.21	0	21.7767	926.222	21.7984
8	105.6	105.6	94.92	90.02	84.37	sp|P14618|KPYM_HUMAN	Pyruvate kinase isozymes M1/M2 OS=Homo sapiens GN=PKM2 PE=1 SV=4	2	99	GDVVIVLTGWRPGSGFTNTMR	Formyl@N-term		0.00630644	2290.16	764.394	2290.15	764.392	3	18	8.1.1.2006.16	0	42.4101	543.502	42.5638
8	105.6	105.6	94.92	90.02	84.37	sp|P14618|KPYM_HUMAN	Pyruvate kinase isozymes M1/M2 OS=Homo sapiens GN=PKM2 PE=1 SV=4	2	99	GDYPLEAVR	iTRAQ8plex@N-term		-0.000790123	1322.71	662.364	1322.71	662.364	2	15	18.1.1.918.15	1	24.3151	4736.26	24.7829
8	105.6	105.6	94.92	90.02	84.37	sp|P14618|KPYM_HUMAN	Pyruvate kinase isozymes M1/M2 OS=Homo sapiens GN=PKM2 PE=1 SV=4	2	99	GIFPVLCKDPVQEAWAEDVDLR	Formyl@N-term; Methylthio(C)@7; iTRAQ8plex(K)@8	missed K-D@8	-0.00516783	2877.43	960.15	2877.43	960.152	3	13	20.1.1.2810.24	0	58.0969	764.161	58.0513
8	105.6	105.6	94.92	90.02	84.37	sp|P14618|KPYM_HUMAN	Pyruvate kinase isozymes M1/M2 OS=Homo sapiens GN=PKM2 PE=1 SV=4	2	99	GSGTAEVELK	Formyl@N-term; iTRAQ8plex(K)@10		0.00178482	1321.71	661.86	1321.7	661.859	2	15	12.1.1.672.15	0	14.4747	3828.63	14.5689
8	105.6	105.6	94.92	90.02	84.37	sp|P14618|KPYM_HUMAN	Pyruvate kinase isozymes M1/M2 OS=Homo sapiens GN=PKM2 PE=1 SV=4	2	99	GVNLPGAAVDLPAVSEK	Formyl@N-term; iTRAQ8plex(K)@17		-0.0160496	1968.07	985.041	1968.08	985.049	2	19	6.1.1.1315.30	0	33.4701	303.833	33.4768
8	105.6	105.6	94.92	90.02	84.37	sp|P14618|KPYM_HUMAN	Pyruvate kinase isozymes M1/M2 OS=Homo sapiens GN=PKM2 PE=1 SV=4	2	99	GVNLPGAAVDLPAVSEKDIQDLK	iTRAQ8plex@N-term; iTRAQ8plex(K)@17; iTRAQ8plex(K)@23	missed K-D@17	0.00774144	3260.88	816.228	3260.87	816.226	4	16	7.1.1.1652.18	1	35.0387	488.08	35.25
8	105.6	105.6	94.92	90.02	84.37	sp|P14618|KPYM_HUMAN	Pyruvate kinase isozymes M1/M2 OS=Homo sapiens GN=PKM2 PE=1 SV=4	2	99	GWRPGSGFTNTMR	Formyl@N-term	cleaved T-G@N-term	0.0158882	1493.7	747.857	1493.68	747.849	2	18	9.1.1.1579.23	0	21.2131	270.857	21.167
8	105.6	105.6	94.92	90.02	84.37	sp|P14618|KPYM_HUMAN	Pyruvate kinase isozymes M1/M2 OS=Homo sapiens GN=PKM2 PE=1 SV=4	2	99	HAAMADTFLEHMCR	Formyl@N-term; Methylthio(C)@13	cleaved L-H@N-term	-0.00826078	1705.68	569.566	1705.68	569.568	3	17	3.1.1.844.5	0	35.6153	212.187	35.9106
8	105.6	105.6	94.92	90.02	84.37	sp|P14618|KPYM_HUMAN	Pyruvate kinase isozymes M1/M2 OS=Homo sapiens GN=PKM2 PE=1 SV=4	2	99	IENHEGVR	Formyl@N-term		0.00066383	980.468	491.241	980.468	491.241	2	12	7.1.1.1228.19	0	9.0228	17685.1	8.8637
8	105.6	105.6	94.92	90.02	84.37	sp|P14618|KPYM_HUMAN	Pyruvate kinase isozymes M1/M2 OS=Homo sapiens GN=PKM2 PE=1 SV=4	2	99	IISKIENHEGVR	Formyl@N-term; iTRAQ8plex(K)@4	missed K-I@4	-0.0101083	1725.96	576.327	1725.97	576.33	3	19	5.1.1.1299.10	0	24.5628	13899.1	24.541
8	105.6	105.6	94.92	90.02	84.37	sp|P14618|KPYM_HUMAN	Pyruvate kinase isozymes M1/M2 OS=Homo sapiens GN=PKM2 PE=1 SV=4	2	99	ITLDNAYMEK	iTRAQ8plex@N-term; Oxidation(M)@8; iTRAQ8plex(K)@10		0.00171811	1820.98	608.001	1820.98	608.001	3	12	3.1.1.551.23	0	17.5898	640.473	17.5464
8	105.6	105.6	94.92	90.02	84.37	sp|P14618|KPYM_HUMAN	Pyruvate kinase isozymes M1/M2 OS=Homo sapiens GN=PKM2 PE=1 SV=4	2	99	IYVDDGLISL	iTRAQ8plex@N-term	cleaved L-Q@C-term	-0.0110871	1410.78	706.397	1410.79	706.403	2	11	9.1.1.1868.10	0	39.0271	373.592	39.0053
8	105.6	105.6	94.92	90.02	84.37	sp|P14618|KPYM_HUMAN	Pyruvate kinase isozymes M1/M2 OS=Homo sapiens GN=PKM2 PE=1 SV=4	2	99	IYVDDGLISLQVK	Formyl@N-term; iTRAQ8plex(K)@13		-0.00808645	1794	898.007	1794.01	898.011	2	17	13.1.1.1943.24	0	44.6956	2218.19	44.0324
8	105.6	105.6	94.92	90.02	84.37	sp|P14618|KPYM_HUMAN	Pyruvate kinase isozymes M1/M2 OS=Homo sapiens GN=PKM2 PE=1 SV=4	2	99	KASDVHEVR	iTRAQ8plex@N-term; iTRAQ8plex(K)@1	missed K-A@1	0.0221329	1647.97	413.001	1647.95	412.995	4	11	15.1.1.3500.2	1	59.1193	32.7113	59.0961
8	105.6	105.6	94.92	90.02	84.37	sp|P14618|KPYM_HUMAN	Pyruvate kinase isozymes M1/M2 OS=Homo sapiens GN=PKM2 PE=1 SV=4	2	99	KGDVVIVLTGWRPGSGFTNTMR	iTRAQ8plex@N-term; iTRAQ8plex(K)@1	missed K-G@1	-0.0126613	2998.65	750.67	2998.66	750.673	4	13	5.1.1.1645.9	1	45.9124	215.462	45.7066
8	105.6	105.6	94.92	90.02	84.37	sp|P14618|KPYM_HUMAN	Pyruvate kinase isozymes M1/M2 OS=Homo sapiens GN=PKM2 PE=1 SV=4	2	99	KGVNLPGAAVDLPAVSEK	iTRAQ8plex@N-term; iTRAQ8plex(K)@1; iTRAQ8plex(K)@18	missed K-G@1	-0.00412059	2676.59	670.155	2676.59	670.156	4	15	7.1.1.1530.19	1	27.5133	624.423	27.4146
8	105.6	105.6	94.92	90.02	84.37	sp|P14618|KPYM_HUMAN	Pyruvate kinase isozymes M1/M2 OS=Homo sapiens GN=PKM2 PE=1 SV=4	2	99	LAPITSDPTEATAVGAVEASFK	iTRAQ8plex@N-term; iTRAQ8plex(K)@22		-0.0157808	2782.51	928.509	2782.52	928.514	3	14	8.1.1.1896.24	1	35.622	171.709	35.577
8	105.6	105.6	94.92	90.02	84.37	sp|P14618|KPYM_HUMAN	Pyruvate kinase isozymes M1/M2 OS=Homo sapiens GN=PKM2 PE=1 SV=4	2	99	LDIDSPPITAR	No iTRAQ8plex@N-term		0.00068671	1196.64	599.328	1196.64	599.327	2	14	2.1.1.495.12	0	18.9364	2743.13	18.9732
8	105.6	105.6	94.92	90.02	84.37	sp|P14618|KPYM_HUMAN	Pyruvate kinase isozymes M1/M2 OS=Homo sapiens GN=PKM2 PE=1 SV=4	2	99	LNFSHGTH	iTRAQ8plex@N-term	cleaved H-E@C-term	-0.00106542	1215.63	406.217	1215.63	406.217	3	12	7.1.1.1308.4	0	13.8228	215.261	13.8728
8	105.6	105.6	94.92	90.02	84.37	sp|P14618|KPYM_HUMAN	Pyruvate kinase isozymes M1/M2 OS=Homo sapiens GN=PKM2 PE=1 SV=4	2	99	LNFSHGTHEYHAETIK	iTRAQ8plex@N-term; iTRAQ8plex(K)@16		-0.0128015	2491.29	499.266	2491.31	499.269	5	16	7.1.1.1515.4	1	26.5602	376.264	26.7342
8	105.6	105.6	94.92	90.02	84.37	sp|P14618|KPYM_HUMAN	Pyruvate kinase isozymes M1/M2 OS=Homo sapiens GN=PKM2 PE=1 SV=4	2	99	NTGIICTIGPASR	Formyl@N-term; Methylthio(C)@6		0.00111942	1375.66	688.837	1375.66	688.837	2	15	17.1.1.1003.14	0	32.7143	169.658	32.8092
8	105.6	105.6	94.92	90.02	84.37	sp|P14618|KPYM_HUMAN	Pyruvate kinase isozymes M1/M2 OS=Homo sapiens GN=PKM2 PE=1 SV=4	2	99	QKGADFLVTEVENGGSLGSK	Gln->pyro-Glu@N-term; iTRAQ8plex(K)@2; iTRAQ8plex(K)@20	missed K-G@2	-0.00833505	2626.4	876.473	2626.41	876.476	3	17	3.1.1.712.25	1	27.52	244.499	27.535
8	105.6	105.6	94.92	90.02	84.37	sp|P14618|KPYM_HUMAN	Pyruvate kinase isozymes M1/M2 OS=Homo sapiens GN=PKM2 PE=1 SV=4	2	99	RFDEILEASDGIMVAR	No iTRAQ8plex@N-term	missed R-F@1	-0.0427428	1820.87	607.963	1820.91	607.977	3	17	8.1.1.1832.9	0	31.6428	113.112	31.6227
8	105.6	105.6	94.92	90.02	84.37	sp|P14618|KPYM_HUMAN	Pyruvate kinase isozymes M1/M2 OS=Homo sapiens GN=PKM2 PE=1 SV=4	2	99	RLDIDSPPITAR	Formyl@N-term	cleaved C-R@N-term; missed R-L@1	-0.000793095	1380.74	691.375	1380.74	691.375	2	19	2.1.1.536.18	0	21.463	2096.17	21.4897
8	105.6	105.6	94.92	90.02	84.37	sp|P14618|KPYM_HUMAN	Pyruvate kinase isozymes M1/M2 OS=Homo sapiens GN=PKM2 PE=1 SV=4	2	99	SGMNVAR	iTRAQ8plex@N-term		-0.00370589	1037.56	519.785	1037.56	519.787	2	12	15.1.1.1438.31	0	10.8968	1890.72	11.0251
8	105.6	105.6	94.92	90.02	84.37	sp|P14618|KPYM_HUMAN	Pyruvate kinase isozymes M1/M2 OS=Homo sapiens GN=PKM2 PE=1 SV=4	2	99	TATESFASDPILYR	iTRAQ8plex@N-term	cleaved R-P@C-term	0.00272692	1873.98	625.666	1873.97	625.665	3	19	5.1.1.1311.11	1	25.306	598.225	25.3444
8	105.6	105.6	94.92	90.02	84.37	sp|P14618|KPYM_HUMAN	Pyruvate kinase isozymes M1/M2 OS=Homo sapiens GN=PKM2 PE=1 SV=4	2	99	TATESFASDPILYRPVAV	Formyl@N-term	cleaved V-A@C-term	-0.0104556	1963.98	982.997	1963.99	983.002	2	18	8.1.1.1917.26	0	36.9238	907.43	36.9372
8	105.6	105.6	94.92	90.02	84.37	sp|P14618|KPYM_HUMAN	Pyruvate kinase isozymes M1/M2 OS=Homo sapiens GN=PKM2 PE=1 SV=4	2	99	TATESFASDPILYRPVAVALDTK	Formyl@N-term; iTRAQ8plex(K)@23		-0.000612369	2796.48	933.169	2796.49	933.169	3	20	11.1.1.1932.24	0	45.8047	3507.89	46.3778
8	105.6	105.6	94.92	90.02	84.37	sp|P14618|KPYM_HUMAN	Pyruvate kinase isozymes M1/M2 OS=Homo sapiens GN=PKM2 PE=1 SV=4	2	99	TGWRPGSGFTNTMR	Formyl@N-term	cleaved L-T@N-term	-0.00480782	1594.73	798.37	1594.73	798.373	2	19	9.1.1.1583.30	0	21.4667	443.998	21.4119
8	105.6	105.6	94.92	90.02	84.37	sp|P14618|KPYM_HUMAN	Pyruvate kinase isozymes M1/M2 OS=Homo sapiens GN=PKM2 PE=1 SV=4	2	99	VFLAQK	iTRAQ8plex@N-term; iTRAQ8plex(K)@6		0.0072986	1312.84	657.427	1312.83	657.424	2	10	15.1.1.1806.8	0	33.5624	171.304	33.472
8	105.6	105.6	94.92	90.02	84.37	sp|P14618|KPYM_HUMAN	Pyruvate kinase isozymes M1/M2 OS=Homo sapiens GN=PKM2 PE=1 SV=4	2	99	VNFAMNVGK	Formyl@N-term; iTRAQ8plex(K)@9		-0.00549236	1310.69	656.352	1310.7	656.355	2	13	10.1.1.1643.24	0	26.9807	3401.02	26.9974
8	105.6	105.6	94.92	90.02	84.37	sp|P14618|KPYM_HUMAN	Pyruvate kinase isozymes M1/M2 OS=Homo sapiens GN=PKM2 PE=1 SV=4	2	99	VVEVGSK	iTRAQ8plex@N-term; iTRAQ8plex(K)@7		-0.00256224	1324.82	663.415	1324.82	663.416	2	12	19.1.1.868.20	1	19.4623	2053.87	19.7339
8	105.6	105.6	94.92	90.02	84.37	sp|P14618|KPYM_HUMAN	Pyruvate kinase isozymes M1/M2 OS=Homo sapiens GN=PKM2 PE=1 SV=4	1.22915	99	RLAPITSDPTEATAVGAVEASFK	Formyl@N-term; iTRAQ8plex(K)@23	missed R-L@1	0.017376	2662.43	888.484	2662.41	888.478	3	17	7.1.1.1648.16	0	34.7885	237.487	34.7567
8	105.6	105.6	94.92	90.02	84.37	sp|P14618|KPYM_HUMAN	Pyruvate kinase isozymes M1/M2 OS=Homo sapiens GN=PKM2 PE=1 SV=4	1.19382	99	SVETLKEMIK	Formyl@N-term; iTRAQ8plex(K)@6; iTRAQ8plex(K)@10	missed K-E@6	-0.00317343	1813.04	605.356	1813.05	605.357	3	16	8.1.1.1819.9	0	30.8397	6458.12	30.8814
8	105.6	105.6	94.92	90.02	84.37	sp|P14618|KPYM_HUMAN	Pyruvate kinase isozymes M1/M2 OS=Homo sapiens GN=PKM2 PE=1 SV=4	1.04576	99	GIFPVL	iTRAQ8plex@N-term	cleaved L-C@C-term	-0.0021488	948.593	475.304	948.595	475.305	2	8	20.1.1.1193.2	0	37.42	680.208	37.536
8	105.6	105.6	94.92	90.02	84.37	sp|P14618|KPYM_HUMAN	Pyruvate kinase isozymes M1/M2 OS=Homo sapiens GN=PKM2 PE=1 SV=4	1.04096	99	EAGTAFIQTQQLHAAMADTFLEHMCR	Glu->pyro-Glu@N-term; Methylthio(C)@25	cleaved S-E@N-term	0.0224249	2947.35	983.456	2947.32	983.449	3	17	8.1.1.2036.27	0	44.2852	300.505	44.359
8	105.6	105.6	94.92	90.02	84.37	sp|P14618|KPYM_HUMAN	Pyruvate kinase isozymes M1/M2 OS=Homo sapiens GN=PKM2 PE=1 SV=4	0.271646	99	TATESFASDPILYRPVAVALDTKGPEIR	Formyl@N-term; iTRAQ8plex(K)@23	missed K-G@23	-0.00296547	3348.78	838.203	3348.79	838.204	4	13	19.1.1.1277.14	0	44.9156	937.616	44.8868
8	105.6	105.6	94.92	90.02	84.37	sp|P14618|KPYM_HUMAN	Pyruvate kinase isozymes M1/M2 OS=Homo sapiens GN=PKM2 PE=1 SV=4	0.0209071	99	TATESFASDPILYRPVAVALDTKGPE	iTRAQ8plex@N-term; iTRAQ8plex(K)@23	cleaved E-I@C-term; missed K-G@23	-8.02781	3347.78	837.953	3355.81	839.96	4	12	20.1.1.1284.18	0	43.1229	256.81	43.0874
8	105.6	105.6	94.92	90.02	84.37	sp|P14618|KPYM_HUMAN	Pyruvate kinase isozymes M1/M2 OS=Homo sapiens GN=PKM2 PE=1 SV=4	0.0352691	98.6	TGLIKGSGTAEVELK	Formyl@N-term; iTRAQ8plex(K)@5; iTRAQ8plex(K)@15	missed K-G@5	-0.00758969	2138.23	713.752	2138.24	713.754	3	13	6.1.1.3246.5	0	57.87	147.574	57.8561
8	105.6	105.6	94.92	90.02	84.37	sp|P14618|KPYM_HUMAN	Pyruvate kinase isozymes M1/M2 OS=Homo sapiens GN=PKM2 PE=1 SV=4	0.0347983	98.41	MQHLIAR	Formyl@N-term		-0.00131472	895.468	448.741	895.47	448.742	2	11	7.1.1.1380.10	0	18.2624	3250.6	18.1189
8	105.6	105.6	94.92	90.02	84.37	sp|P14618|KPYM_HUMAN	Pyruvate kinase isozymes M1/M2 OS=Homo sapiens GN=PKM2 PE=1 SV=4	0.0310503	98.25	GDLGIEIPAEKVFLAQK	Formyl@N-term; iTRAQ8plex(K)@11; iTRAQ8plex(K)@17	missed K-V@11	-0.00647363	2463.41	822.145	2463.42	822.147	3	13	10.1.1.1836.14	0	38.8807	764.561	38.8525
8	105.6	105.6	94.92	90.02	84.37	sp|P14618|KPYM_HUMAN	Pyruvate kinase isozymes M1/M2 OS=Homo sapiens GN=PKM2 PE=1 SV=4	0.50307	97.16	GADFLVTEVEN	iTRAQ8plex@N-term	cleaved N-G@C-term	0.00861109	1496.78	749.395	1496.77	749.391	2	12	2.1.1.624.19	0	26.8845	315.606	26.8481
8	105.6	105.6	94.92	90.02	84.37	sp|P14618|KPYM_HUMAN	Pyruvate kinase isozymes M1/M2 OS=Homo sapiens GN=PKM2 PE=1 SV=4	0.00877392	96.95	GIFPVLCK	Formyl@N-term; Methylthio(C)@7; iTRAQ8plex(K)@8		-0.00893948	1253.67	627.844	1253.68	627.848	2	10	7.1.1.1789.5	0	43.4766	370.801	43.5249
8	105.6	105.6	94.92	90.02	84.37	sp|P14618|KPYM_HUMAN	Pyruvate kinase isozymes M1/M2 OS=Homo sapiens GN=PKM2 PE=1 SV=4	0.0772745	96.78	AWAEDVDLR	iTRAQ8plex@N-term	cleaved E-A@N-term	-0.0041274	1377.72	689.865	1377.72	689.867	2	12	2.1.1.522.24	0	20.61	392.939	20.5041
8	105.6	105.6	94.92	90.02	84.37	sp|P14618|KPYM_HUMAN	Pyruvate kinase isozymes M1/M2 OS=Homo sapiens GN=PKM2 PE=1 SV=4	0.0390538	96.25	RFDEILEASD	iTRAQ8plex@N-term	cleaved D-G@C-term; missed R-F@1	-0.00869279	1497.75	749.884	1497.76	749.888	2	11	3.1.1.631.26	0	22.5249	706.752	22.5382
8	105.6	105.6	94.92	90.02	84.37	sp|P14618|KPYM_HUMAN	Pyruvate kinase isozymes M1/M2 OS=Homo sapiens GN=PKM2 PE=1 SV=4	0.0347983	95.5	LDIDSPPITA	iTRAQ8plex@N-term	cleaved A-R@C-term	-0.00750414	1344.74	673.376	1344.74	673.379	2	11	3.1.1.703.15	0	26.9467	519.83	26.9785
9	101.66	102.03	60.26	38.78	34.13	sp|P35579|MYH9_HUMAN	Myosin-9 OS=Homo sapiens GN=MYH9 PE=1 SV=4	2	99	AGVLAHLEEER	Formyl@N-term		0.00386633	1250.63	626.322	1250.63	626.32	2	18	2.1.1.588.14	0	24.6628	2050.75	24.6344
9	101.66	102.03	60.26	38.78	34.13	sp|P35579|MYH9_HUMAN	Myosin-9 OS=Homo sapiens GN=MYH9 PE=1 SV=4	2	99	ALEEAMEQK	iTRAQ8plex@N-term; iTRAQ8plex(K)@9		-0.00657329	1655.89	552.972	1655.9	552.974	3	12	19.1.1.1011.7	1	28.339	440.314	28.1972
9	101.66	102.03	60.26	38.78	34.13	sp|P35579|MYH9_HUMAN	Myosin-9 OS=Homo sapiens GN=MYH9 PE=1 SV=4	2	99	ALEEAMEQKAELER	iTRAQ8plex@N-term; iTRAQ8plex(K)@9	missed K-A@9	-0.00134764	2254.21	752.41	2254.21	752.41	3	12	2.1.1.613.16	1	26.2064	308.119	26.1143
9	101.66	102.03	60.26	38.78	34.13	sp|P35579|MYH9_HUMAN	Myosin-9 OS=Homo sapiens GN=MYH9 PE=1 SV=4	2	99	ALELDSNLYR	iTRAQ8plex@N-term		-0.0104565	1496.8	749.409	1496.81	749.414	2	17	6.1.1.1178.25	1	25.0193	622.218	25.0344
9	101.66	102.03	60.26	38.78	34.13	sp|P35579|MYH9_HUMAN	Myosin-9 OS=Homo sapiens GN=MYH9 PE=1 SV=4	2	99	ALEQQVEEMK	iTRAQ8plex@N-term; iTRAQ8plex(K)@10		-0.00787434	1811.98	605.002	1811.99	605.004	3	12	18.1.1.1005.12	1	29.7155	119.135	29.7523
9	101.66	102.03	60.26	38.78	34.13	sp|P35579|MYH9_HUMAN	Myosin-9 OS=Homo sapiens GN=MYH9 PE=1 SV=4	2	99	ANLQIDQINTDLNLER	Formyl@N-term		-0.0101459	1896.94	949.479	1896.95	949.484	2	17	6.1.1.1319.25	0	33.7094	372.489	33.7244
9	101.66	102.03	60.26	38.78	34.13	sp|P35579|MYH9_HUMAN	Myosin-9 OS=Homo sapiens GN=MYH9 PE=1 SV=4	2	99	ASITALEAK	iTRAQ8plex@N-term; iTRAQ8plex(K)@9		-0.0126996	1510.91	504.642	1510.92	504.647	3	13	3.1.1.553.10	1	17.6919	2512.02	17.6701
9	101.66	102.03	60.26	38.78	34.13	sp|P35579|MYH9_HUMAN	Myosin-9 OS=Homo sapiens GN=MYH9 PE=1 SV=4	2	99	CNGVLEGIR	iTRAQ8plex@N-term; Methylthio(C)@1; Deamidated(N)@2		-0.00999541	1310.65	656.334	1310.66	656.339	2	14	7.1.1.1497.21	0	25.4793	369.514	25.4393
9	101.66	102.03	60.26	38.78	34.13	sp|P35579|MYH9_HUMAN	Myosin-9 OS=Homo sapiens GN=MYH9 PE=1 SV=4	2	99	DFSALESQLQDTQELLQEENR	iTRAQ8plex@N-term		-0.00323366	2796.37	933.13	2796.37	933.131	3	22	7.1.1.1718.22	1	39.1134	4424.89	39.1953
9	101.66	102.03	60.26	38.78	34.13	sp|P35579|MYH9_HUMAN	Myosin-9 OS=Homo sapiens GN=MYH9 PE=1 SV=4	2	99	DLGEELEALKTELEDTLDSTAAQQELR	Formyl@N-term; iTRAQ8plex(K)@10	missed K-T@10	0.00023031	3348.67	1117.23	3348.67	1117.23	3	20	8.1.1.2085.25	0	47.3157	3015.51	47.2661
9	101.66	102.03	60.26	38.78	34.13	sp|P35579|MYH9_HUMAN	Myosin-9 OS=Homo sapiens GN=MYH9 PE=1 SV=4	2	99	ELEDATETADAMNR	Formyl@N-term; Oxidation(M)@12		0.00789151	1608.67	805.34	1608.66	805.336	2	16	5.1.1.1142.31	0	14.9121	194.78	14.9171
9	101.66	102.03	60.26	38.78	34.13	sp|P35579|MYH9_HUMAN	Myosin-9 OS=Homo sapiens GN=MYH9 PE=1 SV=4	2	99	ELESQISELQEDLESER	Formyl@N-term		0.00915506	2060.95	1031.48	2060.94	1031.48	2	17	17.1.1.1105.30	0	39.0593	534.883	39.1285
9	101.66	102.03	60.26	38.78	34.13	sp|P35579|MYH9_HUMAN	Myosin-9 OS=Homo sapiens GN=MYH9 PE=1 SV=4	2	99	EMEAELEDER	iTRAQ8plex@N-term		0.00205641	1553.72	777.868	1553.72	777.867	2	18	7.1.1.1362.26	1	17.1832	939.055	17.195
9	101.66	102.03	60.26	38.78	34.13	sp|P35579|MYH9_HUMAN	Myosin-9 OS=Homo sapiens GN=MYH9 PE=1 SV=4	2	99	GDLPFVVPR	iTRAQ8plex@N-term		-0.00849601	1302.75	652.383	1302.76	652.387	2	15	10.1.1.1649.16	1	27.3384	811.965	27.3066
9	101.66	102.03	60.26	38.78	34.13	sp|P35579|MYH9_HUMAN	Myosin-9 OS=Homo sapiens GN=MYH9 PE=1 SV=4	2	99	HEMPPHIYAITDTAYR	Formyl@N-term		0.0250358	1941.93	648.317	1941.9	648.309	3	19	8.1.1.1702.22	0	23.6394	801.425	23.4133
9	101.66	102.03	60.26	38.78	34.13	sp|P35579|MYH9_HUMAN	Myosin-9 OS=Homo sapiens GN=MYH9 PE=1 SV=4	2	99	HSQAVEELAEQLEQTKR	Formyl@N-term; iTRAQ8plex(K)@16	missed K-R@16	0.00632876	2327.21	582.809	2327.2	582.808	4	18	4.1.1.1188.5	0	27.6304	410.424	27.8024
9	101.66	102.03	60.26	38.78	34.13	sp|P35579|MYH9_HUMAN	Myosin-9 OS=Homo sapiens GN=MYH9 PE=1 SV=4	2	99	IAQLEEELEEEQGNTELINDR	iTRAQ8plex@N-term		-3.2929e-05	2775.37	926.131	2775.37	926.131	3	18	18.1.1.1252.24	1	45.1234	284.861	45.0778
9	101.66	102.03	60.26	38.78	34.13	sp|P35579|MYH9_HUMAN	Myosin-9 OS=Homo sapiens GN=MYH9 PE=1 SV=4	2	99	IIGLDQVAGMSETALPGAFK	Formyl@N-term; iTRAQ8plex(K)@20		-0.00976476	2349.25	1175.63	2349.26	1175.64	2	16	20.1.1.1300.31	0	44.1426	140.998	44.0854
9	101.66	102.03	60.26	38.78	34.13	sp|P35579|MYH9_HUMAN	Myosin-9 OS=Homo sapiens GN=MYH9 PE=1 SV=4	2	99	IMGIPEEEQMGLLR	iTRAQ8plex@N-term		-0.00171951	1919.01	640.679	1919.02	640.679	3	17	10.1.1.1771.11	1	34.8618	3380.64	34.4053
9	101.66	102.03	60.26	38.78	34.13	sp|P35579|MYH9_HUMAN	Myosin-9 OS=Homo sapiens GN=MYH9 PE=1 SV=4	2	99	IRELESQISELQEDLESER	Formyl@N-term	missed R-E@2	-0.00202082	2330.12	777.715	2330.12	777.715	3	23	4.1.1.1480.15	0	45.6642	421.336	45.634
9	101.66	102.03	60.26	38.78	34.13	sp|P35579|MYH9_HUMAN	Myosin-9 OS=Homo sapiens GN=MYH9 PE=1 SV=4	2	99	KANLQIDQINTDLNLER	iTRAQ8plex@N-term; iTRAQ8plex(K)@1	missed K-A@1	-0.0270866	2605.44	652.367	2605.46	652.373	4	17	7.1.1.1533.13	1	27.6887	329.072	27.6619
9	101.66	102.03	60.26	38.78	34.13	sp|P35579|MYH9_HUMAN	Myosin-9 OS=Homo sapiens GN=MYH9 PE=1 SV=4	2	99	LDPHLVLDQLR	Formyl@N-term		-0.00092524	1345.73	673.875	1345.74	673.875	2	13	17.1.1.1148.16	0	41.7138	172.639	41.6817
9	101.66	102.03	60.26	38.78	34.13	sp|P35579|MYH9_HUMAN	Myosin-9 OS=Homo sapiens GN=MYH9 PE=1 SV=4	2	99	LQQELDDLLVDLDHQR	iTRAQ8plex@N-term		-2.03345	2251.16	751.393	2253.19	752.071	3	20	8.1.1.2086.10	0	47.3487	438.263	47.3274
9	101.66	102.03	60.26	38.78	34.13	sp|P35579|MYH9_HUMAN	Myosin-9 OS=Homo sapiens GN=MYH9 PE=1 SV=4	2	99	LTEMETLQSQLMAEK	Formyl@N-term; iTRAQ8plex(K)@15		-0.00111364	2083.05	695.356	2083.05	695.357	3	13	9.1.1.1870.7	0	39.1459	1607.89	39.3147
9	101.66	102.03	60.26	38.78	34.13	sp|P35579|MYH9_HUMAN	Myosin-9 OS=Homo sapiens GN=MYH9 PE=1 SV=4	2	99	LTKDFSALESQLQDTQELLQEENR	Formyl@N-term; iTRAQ8plex(K)@3	missed K-D@3	-0.00549662	3166.59	1056.54	3166.59	1056.54	3	19	9.1.1.1968.28	0	45.2389	599.515	45.187
9	101.66	102.03	60.26	38.78	34.13	sp|P35579|MYH9_HUMAN	Myosin-9 OS=Homo sapiens GN=MYH9 PE=1 SV=4	2	99	MQQNIQELEEQLEEEESAR	Formyl@N-term		0.0141163	2360.06	787.693	2360.04	787.689	3	18	13.1.1.1845.24	0	38.6425	956.599	38.6592
9	101.66	102.03	60.26	38.78	34.13	sp|P35579|MYH9_HUMAN	Myosin-9 OS=Homo sapiens GN=MYH9 PE=1 SV=4	2	99	NKHEAMITDLEER	Formyl@N-term; iTRAQ8plex(K)@2	missed K-H@2	-0.00359904	1916.95	639.992	1916.96	639.993	3	16	17.1.1.1230.4	0	46.8137	167.741	46.8015
9	101.66	102.03	60.26	38.78	34.13	sp|P35579|MYH9_HUMAN	Myosin-9 OS=Homo sapiens GN=MYH9 PE=1 SV=4	2	99	QIATLHAQVADMK	iTRAQ8plex@N-term; iTRAQ8plex(K)@13		-0.0105355	2033.14	509.293	2033.16	509.296	4	17	9.1.1.1588.9	1	21.7404	763.125	21.7204
9	101.66	102.03	60.26	38.78	34.13	sp|P35579|MYH9_HUMAN	Myosin-9 OS=Homo sapiens GN=MYH9 PE=1 SV=4	2	99	QLAAENR	iTRAQ8plex@N-term		0.000195869	1104.62	553.317	1104.62	553.317	2	10	11.1.1.1331.31	1	8.7743	59.1554	8.7793
9	101.66	102.03	60.26	38.78	34.13	sp|P35579|MYH9_HUMAN	Myosin-9 OS=Homo sapiens GN=MYH9 PE=1 SV=4	2	99	QLEEAEEEAQR	iTRAQ8plex@N-term		-0.00670018	1634.8	545.94	1634.81	545.942	3	16	7.1.1.1337.16	1	15.6264	242.651	15.595
9	101.66	102.03	60.26	38.78	34.13	sp|P35579|MYH9_HUMAN	Myosin-9 OS=Homo sapiens GN=MYH9 PE=1 SV=4	2	99	QLLQANPILEAFGNAK	Formyl@N-term; iTRAQ8plex(K)@16		-0.00517742	2058.14	687.053	2058.14	687.055	3	17	3.1.1.966.5	0	43.1386	1278.29	43.187
9	101.66	102.03	60.26	38.78	34.13	sp|P35579|MYH9_HUMAN	Myosin-9 OS=Homo sapiens GN=MYH9 PE=1 SV=4	2	99	QSACNLEK	iTRAQ8plex@N-term; Methylthio(C)@4; iTRAQ8plex(K)@8		-0.000920851	1545.81	516.277	1545.81	516.277	3	12	2.1.1.428.15	1	14.8046	1174.58	14.7748
9	101.66	102.03	60.26	38.78	34.13	sp|P35579|MYH9_HUMAN	Myosin-9 OS=Homo sapiens GN=MYH9 PE=1 SV=4	2	99	QTLENERGELANEVK	Formyl@N-term; iTRAQ8plex(K)@15	missed R-G@7	-0.00185584	2061.06	688.028	2061.06	688.029	3	15	10.1.1.1499.20	0	18.0911	1129.28	18.0527
9	101.66	102.03	60.26	38.78	34.13	sp|P35579|MYH9_HUMAN	Myosin-9 OS=Homo sapiens GN=MYH9 PE=1 SV=4	2	99	RGDLPFVVPR	Delta:H(2)C(2)@N-term	missed R-G@1	-0.000703822	1180.67	591.343	1180.67	591.343	2	15	9.1.1.1648.15	0	25.4446	597.777	25.4146
9	101.66	102.03	60.26	38.78	34.13	sp|P35579|MYH9_HUMAN	Myosin-9 OS=Homo sapiens GN=MYH9 PE=1 SV=4	2	99	RQLEEAEEEAQR	Formyl@N-term	missed R-Q@1	0.00992211	1514.71	758.36	1514.7	758.355	2	18	3.1.1.456.31	0	11.7548	144.655	11.6979
9	101.66	102.03	60.26	38.78	34.13	sp|P35579|MYH9_HUMAN	Myosin-9 OS=Homo sapiens GN=MYH9 PE=1 SV=4	2	99	SMEAEMIQLQEELAAAER	Formyl@N-term		-0.00377579	2075.95	692.989	2075.95	692.991	3	17	4.1.1.1452.5	0	43.9174	345.877	43.843
9	101.66	102.03	60.26	38.78	34.13	sp|P35579|MYH9_HUMAN	Myosin-9 OS=Homo sapiens GN=MYH9 PE=1 SV=4	2	99	TDLLLEPYNK	iTRAQ8plex@N-term; iTRAQ8plex(K)@10		-0.0193947	1813.03	605.349	1813.04	605.356	3	13	8.1.1.1760.7	1	27.1981	270.861	27.3045
9	101.66	102.03	60.26	38.78	34.13	sp|P35579|MYH9_HUMAN	Myosin-9 OS=Homo sapiens GN=MYH9 PE=1 SV=4	2	99	TELEDTLDSTAAQQELR	Formyl@N-term		-0.00159419	1946.91	974.46	1946.91	974.461	2	16	13.1.1.1693.29	0	29.2709	115.344	29.2176
9	101.66	102.03	60.26	38.78	34.13	sp|P35579|MYH9_HUMAN	Myosin-9 OS=Homo sapiens GN=MYH9 PE=1 SV=4	2	99	THEAQIQEMR	Formyl@N-term		-0.00293723	1269.57	635.794	1269.58	635.796	2	17	9.1.1.1416.27	0	11.1674	2862.84	11.1791
9	101.66	102.03	60.26	38.78	34.13	sp|P35579|MYH9_HUMAN	Myosin-9 OS=Homo sapiens GN=MYH9 PE=1 SV=4	2	99	TRLQQELDDLLVDLDHQR	Formyl@N-term	missed R-L@2	-0.00265547	2234.13	745.716	2234.13	745.717	3	21	8.1.1.2081.4	0	47.0302	646.134	47.0178
9	101.66	102.03	60.26	38.78	34.13	sp|P35579|MYH9_HUMAN	Myosin-9 OS=Homo sapiens GN=MYH9 PE=1 SV=4	2	99	VISGVLQLGNIVFK	Formyl@N-term; iTRAQ8plex(K)@14		-0.00390689	1818.09	910.051	1818.09	910.053	2	18	11.1.1.1962.8	0	47.6326	909.969	47.4915
9	101.66	102.03	60.26	38.78	34.13	sp|P35579|MYH9_HUMAN	Myosin-9 OS=Homo sapiens GN=MYH9 PE=1 SV=4	2	99	VSHLLGINVTDFTR	Formyl@N-term		-0.0100947	1598.83	800.423	1598.84	800.428	2	14	5.1.1.1527.18	0	38.6235	2217.19	38.4025
9	101.66	102.03	60.26	38.78	34.13	sp|P35579|MYH9_HUMAN	Myosin-9 OS=Homo sapiens GN=MYH9 PE=1 SV=4	2	99	VVFQEFR	iTRAQ8plex@N-term		-0.00484928	1227.69	614.851	1227.69	614.853	2	12	10.1.1.1613.23	1	25.1262	1128.27	25.2064
9	101.66	102.03	60.26	38.78	34.13	sp|P35579|MYH9_HUMAN	Myosin-9 OS=Homo sapiens GN=MYH9 PE=1 SV=4	1.26761	99	IAQLEEQLDNETK	iTRAQ8plex@N-term; iTRAQ8plex(K)@13		-1.03519	2137.13	713.385	2138.17	713.73	3	12	20.1.1.1169.15	0	35.9446	209.724	35.8517
9	101.66	102.03	60.26	38.78	34.13	sp|P35579|MYH9_HUMAN	Myosin-9 OS=Homo sapiens GN=MYH9 PE=1 SV=4	0.744727	99	RGDLPFVVP	iTRAQ8plex@N-term	cleaved P-R@C-term; missed R-G@1	-0.00248703	1302.76	652.386	1302.76	652.387	2	11	9.1.1.1725.17	0	30.2047	1485.99	30.233
9	101.66	102.03	60.26	38.78	34.13	sp|P35579|MYH9_HUMAN	Myosin-9 OS=Homo sapiens GN=MYH9 PE=1 SV=4	0.721246	99	LQVELDNVTGLLSQSDSK	Formyl@N-term; iTRAQ8plex(K)@18		-0.0102837	2277.19	760.071	2277.2	760.074	3	15	13.1.1.1936.8	0	44.2365	1158.78	44.3417
9	101.66	102.03	60.26	38.78	34.13	sp|P35579|MYH9_HUMAN	Myosin-9 OS=Homo sapiens GN=MYH9 PE=1 SV=4	0.484126	99	EQADFAIEALAK	Formyl@N-term; iTRAQ8plex(K)@12		-0.00648935	1636.86	819.435	1636.86	819.438	2	15	3.1.1.762.23	0	30.5901	348.886	30.6702
9	101.66	102.03	60.26	38.78	34.13	sp|P35579|MYH9_HUMAN	Myosin-9 OS=Homo sapiens GN=MYH9 PE=1 SV=4	0.482804	99	IAEFTTNLTEEEEK	Formyl@N-term; iTRAQ8plex(K)@14		-0.00424572	1984.97	993.494	1984.98	993.496	2	16	4.1.1.1240.31	0	30.8777	481.385	31.0061
9	101.66	102.03	60.26	38.78	34.13	sp|P35579|MYH9_HUMAN	Myosin-9 OS=Homo sapiens GN=MYH9 PE=1 SV=4	0.221849	99	DFSALESQLQDTQELLQEENRQK	Formyl@N-term; iTRAQ8plex(K)@23	missed R-Q@21	-0.00748747	3080.51	1027.85	3080.52	1027.85	3	17	7.1.1.1739.24	0	40.4148	359.041	40.3697
9	101.66	102.03	60.26	38.78	34.13	sp|P35579|MYH9_HUMAN	Myosin-9 OS=Homo sapiens GN=MYH9 PE=1 SV=4	0.0746879	99	DVLLQVDDER	Formyl@N-term		0.00380092	1228.6	615.306	1228.59	615.304	2	12	17.1.1.893.8	0	25.8883	87.6195	25.8692
9	101.66	102.03	60.26	38.78	34.13	sp|P35579|MYH9_HUMAN	Myosin-9 OS=Homo sapiens GN=MYH9 PE=1 SV=4	0.0565055	99	NTDQASMPDNTAAQK	Formyl@N-term; iTRAQ8plex(K)@15		0.0156855	1922.91	962.462	1922.89	962.455	2	12	7.1.1.1275.18	0	11.8515	202.999	11.8566
9	101.66	102.03	60.26	38.78	34.13	sp|P35579|MYH9_HUMAN	Myosin-9 OS=Homo sapiens GN=MYH9 PE=1 SV=4	0.0540393	99	QLEEAEEEAQRANASR	Formyl@N-term	missed R-A@11	0.0503131	1857.9	929.955	1857.85	929.93	2	13	7.1.1.1375.31	0	17.9916	129.251	17.9349
9	101.66	102.03	60.26	38.78	34.13	sp|P35579|MYH9_HUMAN	Myosin-9 OS=Homo sapiens GN=MYH9 PE=1 SV=4	0.0310503	99	TQLEELEDELQATEDAK	Formyl@N-term; iTRAQ8plex(K)@17		-0.0250108	2293.09	1147.55	2293.11	1147.56	2	14	13.1.1.1850.31	0	38.9629	0	-1
9	101.66	102.03	60.26	38.78	34.13	sp|P35579|MYH9_HUMAN	Myosin-9 OS=Homo sapiens GN=MYH9 PE=1 SV=4	0.0319843	98.88	TEMEDLMSSK	Formyl@N-term; iTRAQ8plex(K)@10		0.00209447	1501.7	751.856	1501.69	751.855	2	12	19.1.1.929.17	0	23.2465	700.019	23.3374
9	101.66	102.03	60.26	38.78	34.13	sp|P35579|MYH9_HUMAN	Myosin-9 OS=Homo sapiens GN=MYH9 PE=1 SV=4	0.0199966	98.87	VEAQLQELQVK	Formyl@N-term; iTRAQ8plex(K)@11		-0.0100918	1615.9	808.957	1615.91	808.962	2	13	3.1.1.705.25	0	27.0869	144.193	27.1019
9	101.66	102.03	60.26	38.78	34.13	sp|P35579|MYH9_HUMAN	Myosin-9 OS=Homo sapiens GN=MYH9 PE=1 SV=4	0.034328	98.63	LKDVLLQVDDERR	Formyl@N-term; iTRAQ8plex(K)@2	missed K-D@2; missed R-R@12	0.0190636	1930.1	644.373	1930.08	644.367	3	12	8.1.1.1824.6	0	31.1438	464.302	31.1287
9	101.66	102.03	60.26	38.78	34.13	sp|P35579|MYH9_HUMAN	Myosin-9 OS=Homo sapiens GN=MYH9 PE=1 SV=4	0.032452	98.58	VKLQEMEGTVK	Formyl@N-term; iTRAQ8plex(K)@2; iTRAQ8plex(K)@11	missed K-L@2	-0.000258013	1897.08	633.367	1897.08	633.367	3	14	2.1.1.531.14	0	21.1476	325.722	21.1193
9	101.66	102.03	60.26	38.78	34.13	sp|P35579|MYH9_HUMAN	Myosin-9 OS=Homo sapiens GN=MYH9 PE=1 SV=4	0.0241089	98.44	LQEMEGTVK	Formyl@N-term; iTRAQ8plex(K)@9		-0.00231185	1365.71	683.862	1365.71	683.863	2	11	17.1.1.816.16	0	21.105	571.271	21.1352
9	101.66	102.03	60.26	38.78	34.13	sp|P35579|MYH9_HUMAN	Myosin-9 OS=Homo sapiens GN=MYH9 PE=1 SV=4	1.56864	98.22	EQEVNILK	iTRAQ8plex@N-term; iTRAQ8plex(K)@8		-0.00691456	1579.93	527.652	1579.94	527.654	3	11	19.1.1.990.6	0	27.0278	470.555	26.9501
9	101.66	102.03	60.26	38.78	34.13	sp|P35579|MYH9_HUMAN	Myosin-9 OS=Homo sapiens GN=MYH9 PE=1 SV=4	0.0181814	97.74	HSQAVEELAEQLEQTK	Formyl@N-term; iTRAQ8plex(K)@16		-0.00557727	2171.1	724.706	2171.1	724.708	3	12	20.1.1.1124.19	0	33.1475	159.928	33.1105
9	101.66	102.03	60.26	38.78	34.13	sp|P35579|MYH9_HUMAN	Myosin-9 OS=Homo sapiens GN=MYH9 PE=1 SV=4	1.42022	97.49	LMATLR	iTRAQ8plex@N-term		-0.00405178	1007.61	504.81	1007.61	504.812	2	10	17.1.1.972.9	0	30.7881	1840.18	30.83
9	101.66	102.03	60.26	38.78	34.13	sp|P35579|MYH9_HUMAN	Myosin-9 OS=Homo sapiens GN=MYH9 PE=1 SV=4	0.0177288	97.21	TLEEEAKTHEAQIQEMR	Formyl@N-term; iTRAQ8plex(K)@7	missed K-T@7	0.00497435	2374.18	792.4	2374.17	792.399	3	12	15.1.1.1944.19	0	42.0857	210.719	42.1107
9	101.66	102.03	60.26	38.78	34.13	sp|P35579|MYH9_HUMAN	Myosin-9 OS=Homo sapiens GN=MYH9 PE=1 SV=4	0.00921731	97.01	LEVNLQAMK	Formyl@N-term; iTRAQ8plex(K)@9		-0.00734315	1376.76	689.386	1376.76	689.389	2	11	8.1.1.1831.15	0	31.591	527.873	31.5611
9	101.66	102.03	60.26	38.78	34.13	sp|P35579|MYH9_HUMAN	Myosin-9 OS=Homo sapiens GN=MYH9 PE=1 SV=4	0.0132283	96.49	HEAMITDLEER	Formyl@N-term		0.00369377	1370.62	686.316	1370.61	686.314	2	12	16.1.1.844.17	0	22.8111	80.5379	22.715
9	101.66	102.03	60.26	38.78	34.13	sp|P35579|MYH9_HUMAN	Myosin-9 OS=Homo sapiens GN=MYH9 PE=1 SV=4	1.17393	95.56	GILTPR	iTRAQ8plex@N-term		-0.00645266	959.601	480.808	959.607	480.811	2	10	6.1.1.1025.14	1	15.5733	3822.59	15.6067
10	89.07	89.07	90.45	86.87	82.39	sp|P04406|G3P_HUMAN	Glyceraldehyde-3-phosphate dehydrogenase OS=Homo sapiens GN=GAPDH PE=1 SV=3	2	99	AAFNSGK	iTRAQ8plex@N-term; iTRAQ8plex(K)@7		-0.00611393	1301.75	651.882	1301.76	651.885	2	12	2.1.1.331.31	1	8.8632	550.478	8.8683
10	89.07	89.07	90.45	86.87	82.39	sp|P04406|G3P_HUMAN	Glyceraldehyde-3-phosphate dehydrogenase OS=Homo sapiens GN=GAPDH PE=1 SV=3	2	99	AENGKLVINGNPITIFQER	Formyl@N-term; Deamidated(N)@3; iTRAQ8plex(K)@5; Deamidated(N)@9	missed K-L@5	-0.00413895	2446.3	816.44	2446.3	816.441	3	18	9.1.1.1803.18	0	35.0223	533.223	34.9871
10	89.07	89.07	90.45	86.87	82.39	sp|P04406|G3P_HUMAN	Glyceraldehyde-3-phosphate dehydrogenase OS=Homo sapiens GN=GAPDH PE=1 SV=3	2	99	AFRVPTANVSVVDLTCR	Formyl@N-term; Methylthio(C)@16	cleaved M-A@N-term; missed R-V@3	-0.0169261	1920.94	961.476	1920.95	961.485	2	13	2.1.1.780.30	0	36.5282	129.536	36.473
10	89.07	89.07	90.45	86.87	82.39	sp|P04406|G3P_HUMAN	Glyceraldehyde-3-phosphate dehydrogenase OS=Homo sapiens GN=GAPDH PE=1 SV=3	2	99	AGAHLQGGAK	Formyl@N-term; iTRAQ8plex(K)@10		-0.0012592	1240.68	621.348	1240.68	621.349	2	15	14.1.1.611.29	0	10.344	1809.99	10.3526
10	89.07	89.07	90.45	86.87	82.39	sp|P04406|G3P_HUMAN	Glyceraldehyde-3-phosphate dehydrogenase OS=Homo sapiens GN=GAPDH PE=1 SV=3	2	99	DGRGALQNIIPASTGAAK	Formyl@N-term; iTRAQ8plex(K)@18	missed R-G@3	0.00249003	2071.14	691.386	2071.13	691.385	3	19	8.1.1.1723.26	0	24.9442	11309.6	24.772
10	89.07	89.07	90.45	86.87	82.39	sp|P04406|G3P_HUMAN	Glyceraldehyde-3-phosphate dehydrogenase OS=Homo sapiens GN=GAPDH PE=1 SV=3	2	99	GALQNIIPAST	iTRAQ8plex@N-term	cleaved T-G@C-term	-0.0033496	1387.79	694.904	1387.8	694.906	2	12	12.1.1.864.28	0	26.4643	231.839	26.4122
10	89.07	89.07	90.45	86.87	82.39	sp|P04406|G3P_HUMAN	Glyceraldehyde-3-phosphate dehydrogenase OS=Homo sapiens GN=GAPDH PE=1 SV=3	2	99	GALQNIIPASTGAAK	Formyl@N-term; iTRAQ8plex(K)@15		-0.00849169	1742.97	872.495	1742.98	872.499	2	16	10.1.1.1677.27	0	29.0853	1956.45	29.0351
10	89.07	89.07	90.45	86.87	82.39	sp|P04406|G3P_HUMAN	Glyceraldehyde-3-phosphate dehydrogenase OS=Homo sapiens GN=GAPDH PE=1 SV=3	2	99	GILGYTEH	iTRAQ8plex@N-term	cleaved H-Q@C-term	-0.00391719	1192.64	597.325	1192.64	597.327	2	12	7.1.1.1400.22	0	19.5134	390.546	19.5334
10	89.07	89.07	90.45	86.87	82.39	sp|P04406|G3P_HUMAN	Glyceraldehyde-3-phosphate dehydrogenase OS=Homo sapiens GN=GAPDH PE=1 SV=3	2	99	GKVKVGVNGFGR	Formyl@N-term; iTRAQ8plex(K)@2; iTRAQ8plex(K)@4; Deamidated(N)@8	cleaved M-G@N-term; missed K-V@2; missed K-V@4	0.0103966	1854.1	464.533	1854.09	464.531	4	14	4.1.1.996.8	0	15.8049	1138.77	15.9103
10	89.07	89.07	90.45	86.87	82.39	sp|P04406|G3P_HUMAN	Glyceraldehyde-3-phosphate dehydrogenase OS=Homo sapiens GN=GAPDH PE=1 SV=3	2	99	IIPASTGAAK	iTRAQ8plex@N-term; iTRAQ8plex(K)@10	cleaved N-I@N-term	-0.00896588	1535.94	512.987	1535.95	512.99	3	16	7.1.1.1384.11	0	18.5099	277.91	18.425
10	89.07	89.07	90.45	86.87	82.39	sp|P04406|G3P_HUMAN	Glyceraldehyde-3-phosphate dehydrogenase OS=Homo sapiens GN=GAPDH PE=1 SV=3	2	99	IISNASCTTNCLAPLAK	Formyl@N-term; Deamidated(N)@4; Methylthio(C)@7; Methylthio(C)@11; iTRAQ8plex(K)@17		-0.00331426	2144.03	1073.02	2144.03	1073.02	2	15	2.1.1.843.27	0	40.4133	494.972	40.425
10	89.07	89.07	90.45	86.87	82.39	sp|P04406|G3P_HUMAN	Glyceraldehyde-3-phosphate dehydrogenase OS=Homo sapiens GN=GAPDH PE=1 SV=3	2	99	ISWYDNEFGYSNR	Formyl@N-term	cleaved L-I@N-term	0.00162784	1677.71	839.861	1677.71	839.86	2	15	10.1.1.1724.26	0	31.9825	592.192	31.9958
10	89.07	89.07	90.45	86.87	82.39	sp|P04406|G3P_HUMAN	Glyceraldehyde-3-phosphate dehydrogenase OS=Homo sapiens GN=GAPDH PE=1 SV=3	2	99	LISWYDNEFGYSNR	iTRAQ8plex@N-term; Deamidated(N)@7		-0.0010249	2067.98	690.335	2067.98	690.335	3	18	15.1.1.1938.11	0	41.7018	909.216	41.6166
10	89.07	89.07	90.45	86.87	82.39	sp|P04406|G3P_HUMAN	Glyceraldehyde-3-phosphate dehydrogenase OS=Homo sapiens GN=GAPDH PE=1 SV=3	2	99	LTGMAFR	Formyl@N-term		0.0012352	822.407	412.211	822.406	412.21	2	11	14.1.1.872.2	0	26.5328	12966.1	26.6482
10	89.07	89.07	90.45	86.87	82.39	sp|P04406|G3P_HUMAN	Glyceraldehyde-3-phosphate dehydrogenase OS=Homo sapiens GN=GAPDH PE=1 SV=3	2	99	LVINGNPITIFQER	iTRAQ8plex@N-term; Deamidated(N)@4		-0.000972266	1918.08	640.368	1918.08	640.368	3	15	3.1.1.842.9	0	35.4985	365.336	35.5402
10	89.07	89.07	90.45	86.87	82.39	sp|P04406|G3P_HUMAN	Glyceraldehyde-3-phosphate dehydrogenase OS=Homo sapiens GN=GAPDH PE=1 SV=3	2	99	LVINGNPITIFQERDPSK	iTRAQ8plex@N-term; Deamidated(N)@4; iTRAQ8plex(K)@18	missed R-D@14	-0.0100509	2649.48	663.379	2649.5	663.381	4	10	21.1.1.1729.12	0	38.4958	136.604	38.4702
10	89.07	89.07	90.45	86.87	82.39	sp|P04406|G3P_HUMAN	Glyceraldehyde-3-phosphate dehydrogenase OS=Homo sapiens GN=GAPDH PE=1 SV=3	2	99	NVSVVDLTCR	iTRAQ8plex@N-term; Methylthio(C)@9	cleaved A-N@N-term	0.0127338	1454.77	728.39	1454.75	728.384	2	13	10.1.1.1638.26	0	26.675	349.651	26.6884
10	89.07	89.07	90.45	86.87	82.39	sp|P04406|G3P_HUMAN	Glyceraldehyde-3-phosphate dehydrogenase OS=Homo sapiens GN=GAPDH PE=1 SV=3	2	99	PTANVSVVDLTCR	Formyl@N-term; Methylthio(C)@12	cleaved V-P@N-term	0.0274249	1447.71	724.861	1447.68	724.847	2	15	10.1.1.1751.11	0	33.6256	158.209	33.664
10	89.07	89.07	90.45	86.87	82.39	sp|P04406|G3P_HUMAN	Glyceraldehyde-3-phosphate dehydrogenase OS=Homo sapiens GN=GAPDH PE=1 SV=3	2	99	QASEGPLK	iTRAQ8plex@N-term; iTRAQ8plex(K)@8		-0.0113642	1436.83	479.952	1436.84	479.956	3	12	15.1.1.1601.5	1	20.8882	717.941	20.9366
10	89.07	89.07	90.45	86.87	82.39	sp|P04406|G3P_HUMAN	Glyceraldehyde-3-phosphate dehydrogenase OS=Homo sapiens GN=GAPDH PE=1 SV=3	2	99	TVDGPSGK	iTRAQ8plex@N-term; iTRAQ8plex(K)@8		-0.0106027	1367.78	684.895	1367.79	684.901	2	12	11.1.1.1381.31	1	11.8394	426.74	11.783
10	89.07	89.07	90.45	86.87	82.39	sp|P04406|G3P_HUMAN	Glyceraldehyde-3-phosphate dehydrogenase OS=Homo sapiens GN=GAPDH PE=1 SV=3	2	99	TVDGPSGKLWR	iTRAQ8plex@N-term; iTRAQ8plex(K)@8	missed K-L@8	-5.5589e-05	1823.05	608.691	1823.05	608.691	3	16	7.1.1.1388.25	1	18.7802	1010.77	18.8571
10	89.07	89.07	90.45	86.87	82.39	sp|P04406|G3P_HUMAN	Glyceraldehyde-3-phosphate dehydrogenase OS=Homo sapiens GN=GAPDH PE=1 SV=3	2	99	VGVNGFGR	iTRAQ8plex@N-term; Deamidated(N)@4		-0.00576686	1109.61	555.811	1109.61	555.814	2	14	2.1.1.422.23	0	14.4503	3840.21	14.3465
10	89.07	89.07	90.45	86.87	82.39	sp|P04406|G3P_HUMAN	Glyceraldehyde-3-phosphate dehydrogenase OS=Homo sapiens GN=GAPDH PE=1 SV=3	2	99	VIHDNFGIVEGL	Formyl@N-term	cleaved L-M@C-term	0.0054075	1339.68	670.849	1339.68	670.846	2	11	9.1.1.1861.7	0	38.5888	439.53	38.6339
10	89.07	89.07	90.45	86.87	82.39	sp|P04406|G3P_HUMAN	Glyceraldehyde-3-phosphate dehydrogenase OS=Homo sapiens GN=GAPDH PE=1 SV=3	2	99	VIHDNFGIVEGLMT	Formyl@N-term	cleaved T-T@C-term	0.00502073	1571.77	786.893	1571.77	786.89	2	13	17.1.1.1148.21	0	41.7222	299.027	41.744
10	89.07	89.07	90.45	86.87	82.39	sp|P04406|G3P_HUMAN	Glyceraldehyde-3-phosphate dehydrogenase OS=Homo sapiens GN=GAPDH PE=1 SV=3	2	99	VIHDNFGIVEGLMTTVH	Formyl@N-term	cleaved H-A@C-term	-0.00682478	1908.93	955.474	1908.94	955.477	2	13	2.1.1.841.24	0	40.2852	143.637	40.3019
10	89.07	89.07	90.45	86.87	82.39	sp|P04406|G3P_HUMAN	Glyceraldehyde-3-phosphate dehydrogenase OS=Homo sapiens GN=GAPDH PE=1 SV=3	2	99	VIISAPSADAPMFVMGVNHEK	Formyl@N-term; iTRAQ8plex(K)@21		0.00591352	2544.31	849.11	2544.3	849.108	3	15	18.1.1.2764.13	0	58.3578	849.97	58.0517
10	89.07	89.07	90.45	86.87	82.39	sp|P04406|G3P_HUMAN	Glyceraldehyde-3-phosphate dehydrogenase OS=Homo sapiens GN=GAPDH PE=1 SV=3	2	99	VIPELNGK	iTRAQ8plex@N-term; Deamidated(N)@6; iTRAQ8plex(K)@8		-0.00396984	1477.89	493.638	1477.9	493.639	3	14	4.1.1.1077.5	0	20.7894	8433.15	20.8378
10	89.07	89.07	90.45	86.87	82.39	sp|P04406|G3P_HUMAN	Glyceraldehyde-3-phosphate dehydrogenase OS=Homo sapiens GN=GAPDH PE=1 SV=3	2	99	VIPELNGKLTGM	iTRAQ8plex@N-term; Deamidated(N)@6; iTRAQ8plex(K)@8	cleaved M-A@C-term; missed K-L@8	-0.0273106	1880.06	627.695	1880.09	627.704	3	15	9.1.1.1745.6	0	31.4204	373.82	31.4054
10	89.07	89.07	90.45	86.87	82.39	sp|P04406|G3P_HUMAN	Glyceraldehyde-3-phosphate dehydrogenase OS=Homo sapiens GN=GAPDH PE=1 SV=3	2	99	VIPELNGKLTGMAFR	iTRAQ8plex@N-term; Deamidated(N)@6; iTRAQ8plex(K)@8	missed K-L@8	-0.0129861	2254.28	564.578	2254.3	564.581	4	10	21.1.1.1735.6	0	38.8605	239.221	38.8449
10	89.07	89.07	90.45	86.87	82.39	sp|P04406|G3P_HUMAN	Glyceraldehyde-3-phosphate dehydrogenase OS=Homo sapiens GN=GAPDH PE=1 SV=3	2	99	VIPELNGKLTGMAFRVPTANVSVVDLTCR	Formyl@N-term; Deamidated(N)@6; iTRAQ8plex(K)@8; Methylthio(C)@28	missed K-L@8; missed R-V@15	-0.00142284	3478.83	870.714	3478.83	870.715	4	17	5.1.1.1662.12	0	46.972	1350.98	47.0087
10	89.07	89.07	90.45	86.87	82.39	sp|P04406|G3P_HUMAN	Glyceraldehyde-3-phosphate dehydrogenase OS=Homo sapiens GN=GAPDH PE=1 SV=3	2	99	VPTANVSVVDLTCR	iTRAQ8plex@N-term; Deamidated(N)@5; Methylthio(C)@13		0.00269428	1823.95	608.989	1823.94	608.988	3	15	10.1.1.1725.7	0	32.0124	296.65	32.0574
10	89.07	89.07	90.45	86.87	82.39	sp|P04406|G3P_HUMAN	Glyceraldehyde-3-phosphate dehydrogenase OS=Homo sapiens GN=GAPDH PE=1 SV=3	2	99	VSVVDLTCR	Formyl@N-term; Methylthio(C)@8	cleaved N-V@N-term	0.00530443	1064.5	533.26	1064.5	533.257	2	10	14.1.1.991.6	0	33.9378	322.544	33.9847
10	89.07	89.07	90.45	86.87	82.39	sp|P04406|G3P_HUMAN	Glyceraldehyde-3-phosphate dehydrogenase OS=Homo sapiens GN=GAPDH PE=1 SV=3	2	99	VVDLMAHMA	Formyl@N-term	cleaved A-S@C-term	0.000662244	1013.47	507.741	1013.47	507.741	2	12	17.1.1.1115.4	0	39.6398	1933.31	39.7523
10	89.07	89.07	90.45	86.87	82.39	sp|P04406|G3P_HUMAN	Glyceraldehyde-3-phosphate dehydrogenase OS=Homo sapiens GN=GAPDH PE=1 SV=3	2	99	VVDLMAHMASK	Formyl@N-term; iTRAQ8plex(K)@11		-0.00586808	1532.79	511.939	1532.8	511.941	3	16	19.1.1.1291.4	0	45.7736	415.966	45.6365
10	89.07	89.07	90.45	86.87	82.39	sp|P04406|G3P_HUMAN	Glyceraldehyde-3-phosphate dehydrogenase OS=Homo sapiens GN=GAPDH PE=1 SV=3	2	99	VVDLMAHMASKE	Formyl@N-term; iTRAQ8plex(K)@11	missed K-E@11	-0.00498904	1661.84	831.926	1661.84	831.928	2	14	17.1.1.1211.14	0	45.6433	617.222	45.6769
10	89.07	89.07	90.45	86.87	82.39	sp|P04406|G3P_HUMAN	Glyceraldehyde-3-phosphate dehydrogenase OS=Homo sapiens GN=GAPDH PE=1 SV=3	2	99	WGDAGAEYVVESTGVFTTMEK	Formyl@N-term; iTRAQ8plex(K)@21		0.00118346	2608.23	870.418	2608.23	870.418	3	14	9.1.1.1900.21	0	41.0215	348.417	41.0432
10	89.07	89.07	90.45	86.87	82.39	sp|P04406|G3P_HUMAN	Glyceraldehyde-3-phosphate dehydrogenase OS=Homo sapiens GN=GAPDH PE=1 SV=3	1.85387	99	VVDLMAH	iTRAQ8plex@N-term	cleaved H-M@C-term	-0.00634752	1087.59	544.804	1087.6	544.807	2	12	9.1.1.1637.16	0	24.7691	877.255	24.7992
10	89.07	89.07	90.45	86.87	82.39	sp|P04406|G3P_HUMAN	Glyceraldehyde-3-phosphate dehydrogenase OS=Homo sapiens GN=GAPDH PE=1 SV=3	1.82391	99	AFRVPTANV	iTRAQ8plex@N-term	cleaved M-A@N-term; cleaved V-S@C-term; missed R-V@3	-0.00957699	1277.73	639.872	1277.74	639.877	2	13	9.1.1.1599.21	0	22.437	519.383	22.4587
10	89.07	89.07	90.45	86.87	82.39	sp|P04406|G3P_HUMAN	Glyceraldehyde-3-phosphate dehydrogenase OS=Homo sapiens GN=GAPDH PE=1 SV=3	1.82391	99	VKVGVNGFGR	iTRAQ8plex@N-term; iTRAQ8plex(K)@2; Deamidated(N)@6	missed K-V@2	-0.00327143	1640.98	411.252	1640.98	411.253	4	13	6.1.1.1071.2	0	18.3853	216.863	18.3161
10	89.07	89.07	90.45	86.87	82.39	sp|P04406|G3P_HUMAN	Glyceraldehyde-3-phosphate dehydrogenase OS=Homo sapiens GN=GAPDH PE=1 SV=3	1.72125	99	GALQNIIPASTGA	iTRAQ8plex@N-term	cleaved A-A@C-term	-0.00399022	1515.85	758.933	1515.86	758.935	2	12	11.1.1.1669.28	0	29.5979	308.429	29.5467
10	89.07	89.07	90.45	86.87	82.39	sp|P04406|G3P_HUMAN	Glyceraldehyde-3-phosphate dehydrogenase OS=Homo sapiens GN=GAPDH PE=1 SV=3	1.3279	99	SVVDLTCR	iTRAQ8plex@N-term; Methylthio(C)@7	cleaved V-S@N-term	-0.00467446	1241.64	621.826	1241.64	621.828	2	12	9.1.1.1618.11	0	23.5908	770.005	23.5681
10	89.07	89.07	90.45	86.87	82.39	sp|P04406|G3P_HUMAN	Glyceraldehyde-3-phosphate dehydrogenase OS=Homo sapiens GN=GAPDH PE=1 SV=3	1.03621	99	GALQNIIPASTG	iTRAQ8plex@N-term	cleaved G-A@C-term	-0.0016188	1444.82	723.416	1444.82	723.417	2	11	12.1.1.856.25	0	25.9607	359.602	25.9759
10	89.07	89.07	90.45	86.87	82.39	sp|P04406|G3P_HUMAN	Glyceraldehyde-3-phosphate dehydrogenase OS=Homo sapiens GN=GAPDH PE=1 SV=3	0.89279	99	GILGYTEHQVVS	iTRAQ8plex@N-term	cleaved S-S@C-term	0.0180676	1605.88	536.302	1605.87	536.296	3	13	8.1.1.1713.13	0	24.3043	426.01	24.2776
10	89.07	89.07	90.45	86.87	82.39	sp|P04406|G3P_HUMAN	Glyceraldehyde-3-phosphate dehydrogenase OS=Homo sapiens GN=GAPDH PE=1 SV=3	0.850781	99	GILGYTEHQVVSSDFNSDTHSS	iTRAQ8plex@N-term	cleaved S-T@C-term	0.020602	2683.29	895.436	2683.27	895.43	3	16	7.1.1.1514.29	0	26.5402	170.552	26.4867
10	89.07	89.07	90.45	86.87	82.39	sp|P04406|G3P_HUMAN	Glyceraldehyde-3-phosphate dehydrogenase OS=Homo sapiens GN=GAPDH PE=1 SV=3	0.732828	99	RVIISAPSAD	iTRAQ8plex@N-term	cleaved D-A@C-term; missed R-V@1	0.00497737	1331.78	666.896	1331.77	666.893	2	12	5.1.1.1180.31	0	17.2505	165.055	17.2556
10	89.07	89.07	90.45	86.87	82.39	sp|P04406|G3P_HUMAN	Glyceraldehyde-3-phosphate dehydrogenase OS=Homo sapiens GN=GAPDH PE=1 SV=3	0.329754	99	LTGMAFRVPTANVSVVDLTCR	Formyl@N-term; Methylthio(C)@20	missed R-V@7	-0.00174837	2323.15	1162.58	2323.15	1162.58	2	18	7.1.1.1802.28	0	44.3145	222.17	44.3245
10	89.07	89.07	90.45	86.87	82.39	sp|P04406|G3P_HUMAN	Glyceraldehyde-3-phosphate dehydrogenase OS=Homo sapiens GN=GAPDH PE=1 SV=3	0.153045	99	LISWYDNEFGYSN	iTRAQ8plex@N-term	cleaved N-R@C-term	-0.00778463	1910.89	956.453	1910.9	956.457	2	12	19.1.1.1183.26	0	39.0715	276.725	39.0851
10	89.07	89.07	90.45	86.87	82.39	sp|P04406|G3P_HUMAN	Glyceraldehyde-3-phosphate dehydrogenase OS=Homo sapiens GN=GAPDH PE=1 SV=3	0.015923	99	AENGKLVINGNPITIFQERDPSK	Formyl@N-term; Deamidated(N)@3; iTRAQ8plex(K)@5; Deamidated(N)@11; iTRAQ8plex(K)@23	missed K-L@5; missed R-D@19	-0.00551127	3177.71	795.434	3177.71	795.436	4	14	9.1.1.1783.23	0	33.7929	595.589	33.7493
10	89.07	89.07	90.45	86.87	82.39	sp|P04406|G3P_HUMAN	Glyceraldehyde-3-phosphate dehydrogenase OS=Homo sapiens GN=GAPDH PE=1 SV=3	0.744727	98.57	VPTANVSVVDL	iTRAQ8plex@N-term	cleaved L-T@C-term	0.00119959	1416.81	709.414	1416.81	709.414	2	12	6.1.1.1289.10	0	31.8294	321.598	31.746
10	89.07	89.07	90.45	86.87	82.39	sp|P04406|G3P_HUMAN	Glyceraldehyde-3-phosphate dehydrogenase OS=Homo sapiens GN=GAPDH PE=1 SV=3	0.00788851	98.4	VVDLMAHM	Formyl@N-term	cleaved M-A@C-term	-0.00107725	942.429	472.222	942.43	472.222	2	11	14.1.1.1073.3	0	39.0347	753.627	39.0866
10	89.07	89.07	90.45	86.87	82.39	sp|P04406|G3P_HUMAN	Glyceraldehyde-3-phosphate dehydrogenase OS=Homo sapiens GN=GAPDH PE=1 SV=3	0.00305075	98.29	AFRVPTANVSVVDL	Formyl@N-term	cleaved M-A@N-term; cleaved L-T@C-term; missed R-V@3	0.0018658	1514.81	758.413	1514.81	758.412	2	12	14.1.1.1061.15	0	38.3109	265.458	38.2804
10	89.07	89.07	90.45	86.87	82.39	sp|P04406|G3P_HUMAN	Glyceraldehyde-3-phosphate dehydrogenase OS=Homo sapiens GN=GAPDH PE=1 SV=3	0.614394	98.25	IISNASCTTN	iTRAQ8plex@N-term; Methylthio(C)@7	cleaved N-C@C-term	-0.0112945	1372.65	687.333	1372.66	687.339	2	10	9.1.1.1588.26	0	21.7687	1368.72	21.7821
10	89.07	89.07	90.45	86.87	82.39	sp|P04406|G3P_HUMAN	Glyceraldehyde-3-phosphate dehydrogenase OS=Homo sapiens GN=GAPDH PE=1 SV=3	0.369572	98.16	SSTFDAGAGIAL	iTRAQ8plex@N-term	cleaved H-S@N-term; cleaved L-N@C-term	-0.0107383	1412.73	707.375	1412.75	707.38	2	12	5.1.1.1376.13	0	29.3119	299.323	29.2851
10	89.07	89.07	90.45	86.87	82.39	sp|P04406|G3P_HUMAN	Glyceraldehyde-3-phosphate dehydrogenase OS=Homo sapiens GN=GAPDH PE=1 SV=3	0.394695	98.1	WGDAGAEYVVE	iTRAQ8plex@N-term	cleaved E-S@C-term	0.00481703	1498.73	750.372	1498.72	750.37	2	11	20.1.1.964.19	0	23.2293	247.787	23.2546
10	89.07	89.07	90.45	86.87	82.39	sp|P04406|G3P_HUMAN	Glyceraldehyde-3-phosphate dehydrogenase OS=Homo sapiens GN=GAPDH PE=1 SV=3	0.135489	97.85	AINDPFIDLNYM	iTRAQ8plex@N-term	cleaved V-A@N-term; cleaved M-V@C-term	-0.0103224	1728.86	865.437	1728.87	865.442	2	12	10.1.1.1856.15	0	40.116	552.969	40.1477
10	89.07	89.07	90.45	86.87	82.39	sp|P04406|G3P_HUMAN	Glyceraldehyde-3-phosphate dehydrogenase OS=Homo sapiens GN=GAPDH PE=1 SV=3	0.0254883	97.67	LEKPAKYDDIK	Formyl@N-term; iTRAQ8plex(K)@3; iTRAQ8plex(K)@6; iTRAQ8plex(K)@11	missed K-Y@6	-0.00226902	2259.32	565.838	2259.32	565.838	4	10	20.1.1.1168.4	0	35.8638	257.303	35.914
10	89.07	89.07	90.45	86.87	82.39	sp|P04406|G3P_HUMAN	Glyceraldehyde-3-phosphate dehydrogenase OS=Homo sapiens GN=GAPDH PE=1 SV=3	0.000434512	97.66	LMAHMASKE	Formyl@N-term; iTRAQ8plex(K)@8	cleaved D-L@N-term; missed K-E@8	-0.00318062	1348.68	450.566	1348.68	450.567	3	13	8.1.1.1647.8	0	20.2319	487.747	20.2135
10	89.07	89.07	90.45	86.87	82.39	sp|P04406|G3P_HUMAN	Glyceraldehyde-3-phosphate dehydrogenase OS=Homo sapiens GN=GAPDH PE=1 SV=3	0.0814455	96.36	VIHDNFGIVEG	iTRAQ8plex@N-term	cleaved G-L@C-term	-0.0138166	1502.79	752.402	1502.8	752.409	2	12	7.1.1.1502.26	0	25.7966	468.582	25.81
10	89.07	89.07	90.45	86.87	82.39	sp|P04406|G3P_HUMAN	Glyceraldehyde-3-phosphate dehydrogenase OS=Homo sapiens GN=GAPDH PE=1 SV=3	0.123782	95.98	VIISAPSADAPMFV	iTRAQ8plex@N-term	cleaved V-M@C-term	-0.00440012	1720.93	861.474	1720.94	861.476	2	11	16.1.1.1082.23	0	37.6239	312.642	37.6424
10	89.07	89.07	90.45	86.87	82.39	sp|P04406|G3P_HUMAN	Glyceraldehyde-3-phosphate dehydrogenase OS=Homo sapiens GN=GAPDH PE=1 SV=3	0.166216	95.77	VIISAPSAD	iTRAQ8plex@N-term	cleaved D-A@C-term	0.0022355	1175.67	588.844	1175.67	588.843	2	11	6.1.1.1136.17	0	22.4117	664.764	22.4401
11	88.68	88.86	95.62	88.25	80.88	sp|P06733|ENOA_HUMAN	Alpha-enolase OS=Homo sapiens GN=ENO1 PE=1 SV=2	2	99	AAVPSGASTGIYE	iTRAQ8plex@N-term	cleaved E-A@C-term	0.00412673	1525.8	763.906	1525.79	763.904	2	15	19.1.1.807.29	0	15.6815	3281	15.69
11	88.68	88.86	95.62	88.25	80.88	sp|P06733|ENOA_HUMAN	Alpha-enolase OS=Homo sapiens GN=ENO1 PE=1 SV=2	2	99	AAVPSGASTGIYEALELR	No iTRAQ8plex@N-term		0.00469594	1803.94	902.978	1803.94	902.976	2	17	8.1.1.1825.23	0	31.2339	385.77	31.1287
11	88.68	88.86	95.62	88.25	80.88	sp|P06733|ENOA_HUMAN	Alpha-enolase OS=Homo sapiens GN=ENO1 PE=1 SV=2	2	99	AAVPSGASTGIYEALELRDNDKTR	Formyl@N-term; iTRAQ8plex(K)@22	missed R-D@18; missed K-T@22	-0.00574615	2865.47	956.165	2865.48	956.166	3	18	6.1.1.1244.29	0	29.0948	1831.66	29.1644
11	88.68	88.86	95.62	88.25	80.88	sp|P06733|ENOA_HUMAN	Alpha-enolase OS=Homo sapiens GN=ENO1 PE=1 SV=2	2	99	ADLAGNSEVILPVPAFNVI	iTRAQ8plex@N-term	cleaved I-A@N-term; cleaved I-N@C-term	0.00404062	2242.26	748.426	2242.25	748.424	3	14	19.1.1.1306.10	0	46.7205	172.065	46.6982
11	88.68	88.86	95.62	88.25	80.88	sp|P06733|ENOA_HUMAN	Alpha-enolase OS=Homo sapiens GN=ENO1 PE=1 SV=2	2	99	AMQEFMILPVGA	iTRAQ8plex@N-term	cleaved L-A@N-term; cleaved A-A@C-term	-0.000485791	1609.85	805.933	1609.85	805.933	2	12	20.1.1.1272.13	0	42.366	606.973	42.2763
11	88.68	88.86	95.62	88.25	80.88	sp|P06733|ENOA_HUMAN	Alpha-enolase OS=Homo sapiens GN=ENO1 PE=1 SV=2	2	99	AMQEFMILPVGAANFR	iTRAQ8plex@N-term	cleaved L-A@N-term	-0.00233747	2098.1	700.374	2098.1	700.374	3	16	5.1.1.1571.4	0	41.3212	501.515	41.2477
11	88.68	88.86	95.62	88.25	80.88	sp|P06733|ENOA_HUMAN	Alpha-enolase OS=Homo sapiens GN=ENO1 PE=1 SV=2	2	99	AVEHINK	iTRAQ8plex@N-term; iTRAQ8plex(K)@7		-0.00839805	1417.84	473.621	1417.85	473.624	3	10	18.1.1.2766.2	0	58.437	315.079	58.5494
11	88.68	88.86	95.62	88.25	80.88	sp|P06733|ENOA_HUMAN	Alpha-enolase OS=Homo sapiens GN=ENO1 PE=1 SV=2	2	99	AVPSGASTGIYEALELR	iTRAQ8plex@N-term	cleaved A-A@N-term	0.040467	2037.15	680.056	2037.1	680.042	3	19	9.1.1.1748.14	0	31.6186	154.253	31.5905
11	88.68	88.86	95.62	88.25	80.88	sp|P06733|ENOA_HUMAN	Alpha-enolase OS=Homo sapiens GN=ENO1 PE=1 SV=2	2	99	DATNVGDEGGFAPNILENK	Formyl@N-term; iTRAQ8plex(K)@19		0.000803825	2292.12	1147.07	2292.12	1147.07	2	21	2.1.1.634.30	0	27.518	957.083	27.5247
11	88.68	88.86	95.62	88.25	80.88	sp|P06733|ENOA_HUMAN	Alpha-enolase OS=Homo sapiens GN=ENO1 PE=1 SV=2	2	99	DYPVVSIEDPFDQDDWGAWQK	iTRAQ8plex@N-term; iTRAQ8plex(K)@21		-0.00141286	3117.52	1040.18	3117.52	1040.18	3	17	7.1.1.1710.27	1	38.6272	224.849	38.5771
11	88.68	88.86	95.62	88.25	80.88	sp|P06733|ENOA_HUMAN	Alpha-enolase OS=Homo sapiens GN=ENO1 PE=1 SV=2	2	99	EFMILPVGAANFR	iTRAQ8plex@N-term	cleaved Q-E@N-term	-0.00194301	1767.96	590.328	1767.96	590.329	3	11	2.1.1.766.7	0	35.6247	51.3778	35.6081
11	88.68	88.86	95.62	88.25	80.88	sp|P06733|ENOA_HUMAN	Alpha-enolase OS=Homo sapiens GN=ENO1 PE=1 SV=2	2	99	EIFDSRGNPTVEVDLFTSK	Formyl@N-term; iTRAQ8plex(K)@19	missed R-G@6	-0.00538386	2485.26	829.427	2485.26	829.429	3	17	8.1.1.1896.15	0	35.607	6670.92	35.7004
11	88.68	88.86	95.62	88.25	80.88	sp|P06733|ENOA_HUMAN	Alpha-enolase OS=Homo sapiens GN=ENO1 PE=1 SV=2	2	99	FTASAGIQVVGDDLTVTNPK	Formyl@N-term; iTRAQ8plex(K)@20		-0.00505208	2364.24	789.088	2364.25	789.09	3	18	8.1.1.1907.15	0	36.2867	244.511	36.3184
11	88.68	88.86	95.62	88.25	80.88	sp|P06733|ENOA_HUMAN	Alpha-enolase OS=Homo sapiens GN=ENO1 PE=1 SV=2	2	99	FTASAGIQVVGDDLTVTNPKR	Formyl@N-term; iTRAQ8plex(K)@20	missed K-R@20	0.0267119	2520.38	841.133	2520.35	841.124	3	18	9.1.1.3593.8	0	58.0048	249.463	57.9861
11	88.68	88.86	95.62	88.25	80.88	sp|P06733|ENOA_HUMAN	Alpha-enolase OS=Homo sapiens GN=ENO1 PE=1 SV=2	2	99	GMDVAASEFFR	Formyl@N-term	cleaved I-G@N-term	-0.0112327	1256.54	629.276	1256.55	629.282	2	13	10.1.1.1758.4	0	34.0459	145.379	33.9723
11	88.68	88.86	95.62	88.25	80.88	sp|P06733|ENOA_HUMAN	Alpha-enolase OS=Homo sapiens GN=ENO1 PE=1 SV=2	2	99	GNPTVEVDLFTSK	Formyl@N-term; iTRAQ8plex(K)@13		-0.00941414	1737.9	869.957	1737.91	869.962	2	19	5.1.1.1407.14	0	31.225	21154.2	31.1889
11	88.68	88.86	95.62	88.25	80.88	sp|P06733|ENOA_HUMAN	Alpha-enolase OS=Homo sapiens GN=ENO1 PE=1 SV=2	2	99	HIADLAGNSEVILPVPAFNVI	iTRAQ8plex@N-term	cleaved I-N@C-term	0.000283064	2492.39	831.806	2492.39	831.805	3	11	2.1.1.916.13	0	44.9119	133.224	44.8847
11	88.68	88.86	95.62	88.25	80.88	sp|P06733|ENOA_HUMAN	Alpha-enolase OS=Homo sapiens GN=ENO1 PE=1 SV=2	2	99	HIADLAGNSEVILPVPAFNVIN	Formyl@N-term	cleaved N-G@C-term	0.00301378	2330.23	777.751	2330.23	777.75	3	13	2.1.1.917.7	0	44.9641	165.322	44.947
11	88.68	88.86	95.62	88.25	80.88	sp|P06733|ENOA_HUMAN	Alpha-enolase OS=Homo sapiens GN=ENO1 PE=1 SV=2	2	99	IDKLMIEMDGTENK	Formyl@N-term; iTRAQ8plex(K)@3; iTRAQ8plex(K)@14	missed K-L@3	0.0029638	2272.19	758.405	2272.19	758.404	3	18	7.1.1.1626.16	0	33.4285	607.733	33.3964
11	88.68	88.86	95.62	88.25	80.88	sp|P06733|ENOA_HUMAN	Alpha-enolase OS=Homo sapiens GN=ENO1 PE=1 SV=2	2	99	IEEELGSK	iTRAQ8plex@N-term; iTRAQ8plex(K)@8		-0.00895373	1511.86	504.959	1511.87	504.962	3	13	15.1.1.1720.10	1	28.2519	1648.84	28.8484
11	88.68	88.86	95.62	88.25	80.88	sp|P06733|ENOA_HUMAN	Alpha-enolase OS=Homo sapiens GN=ENO1 PE=1 SV=2	2	99	IGAEVYHNLK	iTRAQ8plex@N-term; iTRAQ8plex(K)@10		-0.00290862	1751.02	438.761	1751.02	438.762	4	16	7.1.1.1454.4	1	22.7995	3448.04	22.9113
11	88.68	88.86	95.62	88.25	80.88	sp|P06733|ENOA_HUMAN	Alpha-enolase OS=Homo sapiens GN=ENO1 PE=1 SV=2	2	99	LAMQEFMILPVGA	Formyl@N-term	cleaved A-A@C-term	-0.00426966	1446.72	724.368	1446.73	724.37	2	13	5.1.1.1671.5	0	47.5191	1071.76	47.5056
11	88.68	88.86	95.62	88.25	80.88	sp|P06733|ENOA_HUMAN	Alpha-enolase OS=Homo sapiens GN=ENO1 PE=1 SV=2	2	99	LAMQEFMILPVGAANFR	Formyl@N-term; Oxidation(M)@7; Deamidated(N)@15		-0.00457822	1951.95	976.982	1951.95	976.984	2	18	2.1.1.914.23	0	44.8043	131.011	44.7605
11	88.68	88.86	95.62	88.25	80.88	sp|P06733|ENOA_HUMAN	Alpha-enolase OS=Homo sapiens GN=ENO1 PE=1 SV=2	2	99	LAQANGWGVMVSHR	Formyl@N-term; Deamidated(N)@5; Oxidation(M)@10		0.00523277	1569.74	785.878	1569.74	785.875	2	17	7.1.1.1461.30	0	23.2753	467.461	23.282
11	88.68	88.86	95.62	88.25	80.88	sp|P06733|ENOA_HUMAN	Alpha-enolase OS=Homo sapiens GN=ENO1 PE=1 SV=2	2	99	LMIEMDGTENK	iTRAQ8plex@N-term; iTRAQ8plex(K)@11		0.00398526	1887.99	630.338	1887.99	630.337	3	16	6.1.1.1177.14	1	24.9392	974.527	24.9726
11	88.68	88.86	95.62	88.25	80.88	sp|P06733|ENOA_HUMAN	Alpha-enolase OS=Homo sapiens GN=ENO1 PE=1 SV=2	2	99	MILPVGAANFR	iTRAQ8plex@N-term	cleaved F-M@N-term	0.00253213	1491.86	498.293	1491.85	498.292	3	14	2.1.1.665.3	0	29.3864	460.038	29.3762
11	88.68	88.86	95.62	88.25	80.88	sp|P06733|ENOA_HUMAN	Alpha-enolase OS=Homo sapiens GN=ENO1 PE=1 SV=2	2	99	PTVEVDLFTSK	Formyl@N-term; iTRAQ8plex(K)@11	cleaved N-P@N-term	-0.0124071	1566.83	784.423	1566.84	784.43	2	18	7.1.1.1636.14	0	34.0438	1581.75	34.0772
11	88.68	88.86	95.62	88.25	80.88	sp|P06733|ENOA_HUMAN	Alpha-enolase OS=Homo sapiens GN=ENO1 PE=1 SV=2	2	99	SGETEDTFIADLVVGLCTGQIK	Formyl@N-term; Methylthio(C)@17; iTRAQ8plex(K)@22		0.017726	2673.34	892.119	2673.32	892.113	3	12	9.1.1.2005.7	0	47.5109	291.49	47.4848
11	88.68	88.86	95.62	88.25	80.88	sp|P06733|ENOA_HUMAN	Alpha-enolase OS=Homo sapiens GN=ENO1 PE=1 SV=2	2	99	SGKYDLDFK	iTRAQ8plex@N-term; iTRAQ8plex(K)@3; iTRAQ8plex(K)@9	missed K-Y@3	0.010615	1984.15	497.045	1984.14	497.042	4	11	3.1.1.549.9	1	17.4427	582.013	17.4844
11	88.68	88.86	95.62	88.25	80.88	sp|P06733|ENOA_HUMAN	Alpha-enolase OS=Homo sapiens GN=ENO1 PE=1 SV=2	2	99	SGKYDLDFKSPDDPSR	Formyl@N-term; iTRAQ8plex(K)@3; iTRAQ8plex(K)@9	missed K-Y@3; missed K-S@9	0.00619491	2462.26	616.572	2462.25	616.571	4	15	2.1.1.482.18	0	18.1447	15767.3	17.9243
11	88.68	88.86	95.62	88.25	80.88	sp|P06733|ENOA_HUMAN	Alpha-enolase OS=Homo sapiens GN=ENO1 PE=1 SV=2	2	99	TIAPALVSK	iTRAQ8plex@N-term; iTRAQ8plex(K)@9		-0.00240492	1506.96	503.326	1506.96	503.327	3	15	8.1.1.1666.11	1	21.405	20902.7	21.4434
11	88.68	88.86	95.62	88.25	80.88	sp|P06733|ENOA_HUMAN	Alpha-enolase OS=Homo sapiens GN=ENO1 PE=1 SV=2	2	99	VNQIGSVTESLQACK	iTRAQ8plex@N-term; Deamidated(N)@2; Methylthio(C)@14; iTRAQ8plex(K)@15		-0.00242372	2231.17	744.731	2231.18	744.732	3	17	9.1.1.1712.21	0	29.4089	419.629	29.3689
11	88.68	88.86	95.62	88.25	80.88	sp|P06733|ENOA_HUMAN	Alpha-enolase OS=Homo sapiens GN=ENO1 PE=1 SV=2	2	99	VVIGMDVAASEFFR	Formyl@N-term		-0.000275074	1567.77	784.892	1567.77	784.893	2	16	20.1.1.2803.13	0	57.6393	201.156	57.6745
11	88.68	88.86	95.62	88.25	80.88	sp|P06733|ENOA_HUMAN	Alpha-enolase OS=Homo sapiens GN=ENO1 PE=1 SV=2	2	99	YISPDQLADLYK	Formyl@N-term; iTRAQ8plex(K)@12		0.00340806	1756.92	879.468	1756.92	879.467	2	15	10.1.1.1772.24	0	34.9453	20198	34.9002
11	88.68	88.86	95.62	88.25	80.88	sp|P06733|ENOA_HUMAN	Alpha-enolase OS=Homo sapiens GN=ENO1 PE=1 SV=2	2	99	YNQLLRIEEELGSK	Formyl@N-term; iTRAQ8plex(K)@14	missed R-I@6	-0.00253794	2023.09	675.37	2023.09	675.37	3	19	8.1.1.1925.4	0	37.3828	1816.67	37.4328
11	88.68	88.86	95.62	88.25	80.88	sp|P06733|ENOA_HUMAN	Alpha-enolase OS=Homo sapiens GN=ENO1 PE=1 SV=2	1.16749	99	AGAVEKGVPLYR	Formyl@N-term; iTRAQ8plex(K)@6	missed K-G@6	-0.00356988	1590.9	531.307	1590.9	531.308	3	16	3.1.1.569.11	0	18.6807	1103.35	18.7191
11	88.68	88.86	95.62	88.25	80.88	sp|P06733|ENOA_HUMAN	Alpha-enolase OS=Homo sapiens GN=ENO1 PE=1 SV=2	0.692504	99	FGANAILGVSLAVCK	Formyl@N-term; Methylthio(C)@14; iTRAQ8plex(K)@15		0.00601482	1840	921.005	1839.99	921.002	2	12	1.1.1.3271.10	0	57.6559	69.4793	57.6257
11	88.68	88.86	95.62	88.25	80.88	sp|P06733|ENOA_HUMAN	Alpha-enolase OS=Homo sapiens GN=ENO1 PE=1 SV=2	0.625252	99	YISPDQLADLY	iTRAQ8plex@N-term	cleaved Y-K@C-term	-0.00364797	1600.83	801.42	1600.83	801.422	2	12	8.1.1.1874.15	0	34.2463	845.05	34.278
11	88.68	88.86	95.62	88.25	80.88	sp|P06733|ENOA_HUMAN	Alpha-enolase OS=Homo sapiens GN=ENO1 PE=1 SV=2	0.486782	99	DATNVGDEGGFAPNILENKEGLELLK	Formyl@N-term; iTRAQ8plex(K)@19; iTRAQ8plex(K)@26	missed K-E@19	0.016835	3378.79	845.706	3378.78	845.701	4	18	6.1.1.1380.18	0	37.4747	2194.95	37.5634
11	88.68	88.86	95.62	88.25	80.88	sp|P06733|ENOA_HUMAN	Alpha-enolase OS=Homo sapiens GN=ENO1 PE=1 SV=2	0.414539	99	FGANAILGV	iTRAQ8plex@N-term; Deamidated(N)@4	cleaved V-S@C-term	-0.00629267	1165.66	583.837	1165.67	583.84	2	11	10.1.1.1754.5	0	33.8004	247.496	33.7872
11	88.68	88.86	95.62	88.25	80.88	sp|P06733|ENOA_HUMAN	Alpha-enolase OS=Homo sapiens GN=ENO1 PE=1 SV=2	0.319665	99	AAVPSGASTGIYEALEL	iTRAQ8plex@N-term	cleaved L-R@C-term	-0.019918	1952.02	977.018	1952.04	977.028	2	11	7.1.1.1686.27	0	37.1489	187.292	37.2225
11	88.68	88.86	95.62	88.25	80.88	sp|P06733|ENOA_HUMAN	Alpha-enolase OS=Homo sapiens GN=ENO1 PE=1 SV=2	0.304518	99	HIADLAGNSEVILPVPAFNVINGGSHAGNK	Formyl@N-term; Deamidated(N)@22; iTRAQ8plex(K)@30		0.00581471	3343.75	836.945	3343.75	836.944	4	19	1.1.1.2907.15	0	43.9462	612.209	43.8433
11	88.68	88.86	95.62	88.25	80.88	sp|P06733|ENOA_HUMAN	Alpha-enolase OS=Homo sapiens GN=ENO1 PE=1 SV=2	0.270026	99	AVEHINKTIAPALVSK	Formyl@N-term; iTRAQ8plex(K)@7; iTRAQ8plex(K)@16	missed K-T@7	-0.00349929	2326.38	582.602	2326.38	582.603	4	12	10.1.1.1624.10	0	25.7842	372.231	25.7006
11	88.68	88.86	95.62	88.25	80.88	sp|P06733|ENOA_HUMAN	Alpha-enolase OS=Homo sapiens GN=ENO1 PE=1 SV=2	0.266001	99	HIADLAGNSEVILPVPAFNVINGGSHAGNKLAMQEFM	iTRAQ8plex@N-term; iTRAQ8plex(K)@30	cleaved M-I@C-term; missed K-L@30	-11.0157	4458.33	1115.59	4469.34	1118.34	4	12	1.1.1.2860.23	0	41.0268	357.348	41.5969
11	88.68	88.86	95.62	88.25	80.88	sp|P06733|ENOA_HUMAN	Alpha-enolase OS=Homo sapiens GN=ENO1 PE=1 SV=2	0.117475	99	AAVPSGASTGIYEALELRDNDK	Formyl@N-term; iTRAQ8plex(K)@22	missed R-D@18	-0.000675772	2608.33	870.45	2608.33	870.45	3	14	5.1.1.1396.28	0	30.562	1674.85	30.572
11	88.68	88.86	95.62	88.25	80.88	sp|P06733|ENOA_HUMAN	Alpha-enolase OS=Homo sapiens GN=ENO1 PE=1 SV=2	0.112383	99	PSGASTGIYEALELR	No iTRAQ8plex@N-term	cleaved V-P@N-term	-0.018678	1562.78	782.395	1562.79	782.404	2	12	8.1.1.1907.13	0	36.2833	116.173	36.3184
11	88.68	88.86	95.62	88.25	80.88	sp|P06733|ENOA_HUMAN	Alpha-enolase OS=Homo sapiens GN=ENO1 PE=1 SV=2	0.0376307	99	HIADLAGNSEVILPVPAFNV	Formyl@N-term	cleaved V-I@C-term	0.00911433	2103.11	1052.56	2103.1	1052.56	2	14	19.1.1.1278.28	0	45.0014	250.303	45.0117
11	88.68	88.86	95.62	88.25	80.88	sp|P06733|ENOA_HUMAN	Alpha-enolase OS=Homo sapiens GN=ENO1 PE=1 SV=2	0.00348833	99	IGAEVYHNL	Formyl@N-term	cleaved L-K@C-term	-0.00213933	1042.51	522.26	1042.51	522.261	2	14	3.1.1.694.7	0	26.3786	371.346	26.4237
11	88.68	88.86	95.62	88.25	80.88	sp|P06733|ENOA_HUMAN	Alpha-enolase OS=Homo sapiens GN=ENO1 PE=1 SV=2	0.000434512	99	DATNVGDEGGFAPNILENKEGLEL	iTRAQ8plex@N-term; iTRAQ8plex(K)@19	cleaved L-L@C-term; missed K-E@19	-7.04609	3102.56	1035.19	3109.6	1037.54	3	13	7.1.1.1763.26	0	41.9025	3853.51	42.0397
11	88.68	88.86	95.62	88.25	80.88	sp|P06733|ENOA_HUMAN	Alpha-enolase OS=Homo sapiens GN=ENO1 PE=1 SV=2	0.355561	98.96	FMILPVGA	iTRAQ8plex@N-term	cleaved E-F@N-term; cleaved A-A@C-term	-0.0047138	1150.67	576.341	1150.67	576.344	2	12	6.1.1.1438.3	0	41.0389	517.791	41.0906
11	88.68	88.86	95.62	88.25	80.88	sp|P06733|ENOA_HUMAN	Alpha-enolase OS=Homo sapiens GN=ENO1 PE=1 SV=2	0.281498	98.86	AASEFFR	iTRAQ8plex@N-term	cleaved V-A@N-term	-0.00675181	1130.6	566.305	1130.6	566.309	2	12	9.1.1.1572.19	0	20.771	585.492	20.7342
11	88.68	88.86	95.62	88.25	80.88	sp|P06733|ENOA_HUMAN	Alpha-enolase OS=Homo sapiens GN=ENO1 PE=1 SV=2	0.598599	98.46	MILPVGA	iTRAQ8plex@N-term	cleaved F-M@N-term; cleaved A-A@C-term	-0.00159741	1003.6	502.809	1003.6	502.809	2	11	16.1.1.952.5	0	29.5183	921.95	29.5669
11	88.68	88.86	95.62	88.25	80.88	sp|P06733|ENOA_HUMAN	Alpha-enolase OS=Homo sapiens GN=ENO1 PE=1 SV=2	0.74958	98.28	GNPTVEVDLF	iTRAQ8plex@N-term	cleaved F-T@C-term	-0.00219942	1393.74	697.876	1393.74	697.877	2	12	4.1.1.1247.14	0	31.2817	922.78	31.2532
11	88.68	88.86	95.62	88.25	80.88	sp|P06733|ENOA_HUMAN	Alpha-enolase OS=Homo sapiens GN=ENO1 PE=1 SV=2	1.65758	98.15	YMGKGVSK	iTRAQ8plex@N-term; iTRAQ8plex(K)@4; iTRAQ8plex(K)@8	missed K-G@4	-0.00253458	1781.06	446.273	1781.06	446.273	4	12	5.1.1.1117.7	1	13.3319	776.386	13.3156
11	88.68	88.86	95.62	88.25	80.88	sp|P06733|ENOA_HUMAN	Alpha-enolase OS=Homo sapiens GN=ENO1 PE=1 SV=2	0.158015	98.04	AVPSGASTGIYE	iTRAQ8plex@N-term	cleaved A-A@N-term; cleaved E-A@C-term	0.00539821	1454.76	728.388	1454.76	728.385	2	12	19.1.1.800.29	0	15.2467	504.253	15.2552
11	88.68	88.86	95.62	88.25	80.88	sp|P06733|ENOA_HUMAN	Alpha-enolase OS=Homo sapiens GN=ENO1 PE=1 SV=2	0.185752	97.32	HIADLAGNSE	iTRAQ8plex@N-term	cleaved E-V@C-term	-0.00699601	1329.68	665.845	1329.68	665.849	2	11	2.1.1.393.31	0	12.6807	433.73	12.6241
[truncated: 8,273 more rows]

## Sheet: S3
Protein Group	Unused Protein Score	Total Protein Score	%Cov(95)	Accession Number	Accession Name	Accession Name	Molecular Weight	Unique Peptides for ID (95% FDR)	Peptides used for Quant	Unique Peptides used for Quant	114:113	116:115	118:117	121:119
[truncated: 1,125 more rows]

[truncated: 2 more sheets: S4, S5]
